# Supplementary material for: Asymmetric Sonogashira C(sp3)–C(sp) bond coupling enabled by a copper(i) complex of a new guanidine-hybrid ligand
Source: Royal Society of Chemistry journal article supplement (doi:10.1039/d2qo01283a), 2022-01-01
Supplement: d2qo01283a1.pdf [file d2qo01283a1.pdf]

## Supplementary Information for

# Asymmetric Sonogashira C(sp<sup>3</sup>)-C(sp) Bond Coupling Enabled by Copper(I) Complex of New Guanidine-Hybrid Ligand

Jinzhao Li, Lichao Ning, Qingfa Tan, Xiaoming Feng, and Xiaohua Liu\*

Key Laboratory of Green Chemistry & Technology, Ministry of Education, College of  
Chemistry, Sichuan University, Chengdu 610064, China

\*Corresponding Author: Xiaohua Liu: liuxh@scu.edu.cn

## Table of Contents

|                                                                                             |     |
|---------------------------------------------------------------------------------------------|-----|
| 1. General Information .....                                                                | 3   |
| 2. General procedure for the synthesis of 2-picoylamine-based guanidine-amide ligands ..... | 3   |
| 3. Optimization of reaction conditions.....                                                 | 8   |
| 4. Full list of the coupling products. ....                                                 | 11  |
| 5. General procedure for the catalytic reactions.....                                       | 12  |
| 6. Characterization of the products .....                                                   | 13  |
| 7. X-ray crystal data .....                                                                 | 47  |
| 8. Mechanistic Studies .....                                                                | 49  |
| 9. Computational details.....                                                               | 60  |
| 10. Copies of NMR spectra for the ligands and the products .....                            | 74  |
| 11. References .....                                                                        | 121 |
| 12. Author Contributions .....                                                              | 121 |

## 1. General Information

Unless otherwise noted, reagents were obtained from commercial sources and used without further purification. Column chromatography was generally performed on silica gel (300–400 mesh) and reactions were monitored with thin-layer chromatography (TLC) using 254 nm UV light and basic KMnO<sub>4</sub> aqueous.

NMR characterization data were collected on Bruker ASCENDTM operating at 400 MHz for <sup>1</sup>H NMR, 101 MHz for <sup>13</sup>C{<sup>1</sup>H} NMR (with complete proton decoupling), and 376 MHz for <sup>19</sup>F{<sup>1</sup>H} NMR (with complete proton decoupling). <sup>1</sup>H NMR chemical shifts were reported in ppm from tetramethylsilane with the TMS resonance as the internal standard ( $\delta = 0.00$ ). <sup>13</sup>C NMR spectra chemical shifts are reported in ppm from the tetramethylsilane with the solvent resonance as internal standard (CDCl<sub>3</sub>,  $\delta = 77.0$ , CD<sub>2</sub>Cl<sub>2</sub>,  $\delta = 53.8$ , (CD<sub>3</sub>)<sub>2</sub>CO,  $\delta = 206.3$ ,  $\delta = 29.8$ , CD<sub>3</sub>CN,  $\delta = 118.3$ ,  $\delta = 1.3$ ). Spectra were reported as follows: chemical shift ( $\delta$  ppm), multiplicity (s = singlet, d = doublet, t = triplet, q = quartet, m = multiplet), coupling constants (Hz), integration and assignment. Enantiomeric ratios (er) were determined by high-performance liquid chromatography (HPLC) analysis using the corresponding commercial chiral column as stated in the experimental procedures at 25 °C.

Optical rotations were measured on Rudolph Research Analytic Automatic Polarimeter, and reported as follows:  $[\alpha]_D^{25}$  (c g/100 mL, in solvent).

High-resolution mass spectra (HRMS) were performed on Thermo Q-Exactive Focus (FTMS+c ESI) and data were reported as (m/z).

Infrared spectra (IR) were recorded on Bruker Tensor II spectrometer with Plantium ATR accessory and the peaks are reported as absorption maxima ( $\nu$ , cm<sup>-1</sup>).

All catalytic reactions were run in over-dried glassware. Tetrahydrofuran (THF), toluene, and diethyl ether (Et<sub>2</sub>O) were distilled from sodium benzophenone ketyl. Ethyl acetate (EtOAc), and dichloromethane (DCM) were distilled over CaH<sub>2</sub>.

The preparation of alkyl halide<sup>1</sup> followed the literature.

## 2. General procedure for the synthesis of 2-picolyamine-based guanidine-amide ligands

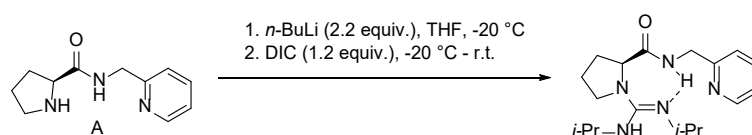

**General Procedure for the synthesis of guanidine G.** In an over-dried RB flask, amide A (1.0 mmol, 1.0 equiv.) was dissolved in THF (20 mL) and cooled to -20 °C under nitrogen atmosphere. *n*-BuLi (2.4 M in hexane, 2.2 mmol, 2.2 equiv.) was added dropwise. After stirring at -20 °C for 20 mins, *N,N*-diisopropylcarbodiimide (1.2 mmol, 1.2 equiv.) was added dropwise. The reaction mixture was slowly warmed up to rt and further stirred for 48 h. The reaction was quenched with water (25 mL) at 0 °C and extracted with dichloromethane (3 × 20 mL). The combined organic layer was washed with brine, then dried over anhydrous Na<sub>2</sub>SO<sub>4</sub>, filtered and concentrated under reduced pressure. The residue was then purified by flash chromatography on silica gel (eluent: DCM/MeOH/NEt<sub>3</sub> = 85:15:1) to afford the corresponding guanidine.

### Guanidine G-PrPy

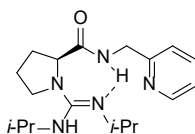

1.0 mmol scale, 130 mg, pale yellow oil, 39% yield.  $[\alpha]_{\text{D}}^{20} = -15.0$  (c 0.60,  $\text{CH}_2\text{Cl}_2$ ).

**$^1\text{H NMR}$**  (400 MHz,  $\text{CDCl}_3$ )  $\delta$  8.94 (brs, 1H), 8.56 (t,  $J = 5.9$  Hz, 1H), 7.66 (t,  $J = 7.6$  Hz, 1H), 7.34 (dd,  $J = 12.4$ , 8.0 Hz, 1H), 7.25 - 7.13 (m, 1H), 5.88 (brs, 1H), 4.15 - 3.42 (m, 4H), 3.10 - 2.92 (m, 2H), 2.14 - 2.07 (m, 1H), 1.95 - 1.83 (m, 1H), 1.76 - 1.67 (m, 2H), 1.22 - 0.88 (m, 12H).

**$^{13}\text{C NMR}$**  (101 MHz,  $\text{CDCl}_3$ )  $\delta$  174.4, 152.2, 149.1, 149.0, 136.9, 122.57, 121.96, 60.7, 60.6, 47.3, 47.2, 30.8, 30.6, 26.1, 26.0, 24.8, 23.3.

**HR-MS** (ESI) calcd for  $\text{C}_{18}\text{H}_{30}\text{N}_5\text{O}^+$  ( $[\text{M}+\text{H}]^+$ ): 332.2445, found 332.2441;

**IR** (neat) 13326, 2964, 2868, 1639, 1589, 1499, 1436, 1169, 1124, 995, 735  $\text{cm}^{-1}$ .

### Guanidine G-qPrPy

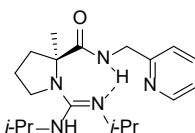

1.0 mmol scale, 157 mg, pale yellow oil, 45% yield.  $[\alpha]_{\text{D}}^{20} = -16.3$  (c 0.44,  $\text{CH}_2\text{Cl}_2$ ).

**$^1\text{H NMR}$**  (400 MHz,  $\text{CDCl}_3$ )  $\delta$  9.21 (brs, 1H), 8.58 - 8.56 (m, 1H), 7.66 (t,  $J = 8.0$  Hz, 1H), 7.33 (t,  $J = 7.2$  Hz, 1H), 7.20 (t,  $J = 6.2$  Hz, 1H), 5.90 (brs, 1H), 4.17 (m, 3H), 3.15 - 3.07 (m, 1H), 3.00 - 2.83 (m, 1H), 2.29 - 2.22 (m, 1H), 1.86 - 1.55 (m, 4H), 1.40 (d,  $J = 16.8$  Hz, 3H), 1.11 - 1.01 (m, 12H).

**$^{13}\text{C NMR}$**  (101 MHz,  $\text{CDCl}_3$ )  $\delta$  176.6, 156.9, 152.1, 149.1, 136.9, 122.5, 122.0, 66.4, 47.2, 47.1, 38.0, 37.4, 26.5, 26.4, 25.8, 25.7, 25.0, 22.4.

**HR-MS** (ESI) calcd for  $\text{C}_{19}\text{H}_{32}\text{N}_5\text{O}^+$  ( $[\text{M}+\text{H}]^+$ ): 346.2601, found 346.2600;

**IR** (neat) 3326, 2963, 2688, 1643, 1590, 1570, 1495, 1365, 1170, 1052, 753  $\text{cm}^{-1}$ .

### Guanidine G-PePy

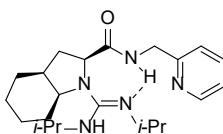

3.0 mmol scale, 719 mg, pale yellow oil, 62% yield.  $[\alpha]_{\text{D}}^{20} = +8.2$  (c 0.33,  $\text{CH}_2\text{Cl}_2$ ).

**$^1\text{H NMR}$**  (400 MHz,  $\text{CDCl}_3$ )  $\delta$  9.19 (brs, 1H), 8.57 - 8.53 (m, 1H), 7.65 (t,  $J = 7.2$  Hz, 1H), 7.37 - 7.32 (m, 1H), 7.20 - 7.17 (m, 1H), 5.96 (s, 1H), 4.61 - 3.47 (m, 4H), 3.31 (dt,  $J = 9.6$ , 4.8 Hz, 1H), 2.34 - 2.20 (m, 1H), 1.99 - 1.89 (m, 1H), 1.83 - 1.60 (m, 4H), 1.55 - 1.43 (m, 2H), 1.39 - 1.23 (m, 4H), 1.18 - 0.94 (m, 12H).

**$^{13}\text{C NMR}$**  (101 MHz,  $\text{CDCl}_3$ )  $\delta$  175.1, 157.4, 152.2, 149.1, 136.9, 122.4, 122.2, 58.9, 57.4, 38.0, 37.6, 35.9, 35.6, 29.4, 29.3, 27.8, 27.4, 25.0, 24.2, 23.8, 22.6, 21.6, 20.9.

**HR-MS** (ESI) calcd for  $\text{C}_{22}\text{H}_{35}\text{N}_5\text{O}^+$  ( $[\text{M}+\text{H}]^+$ ): 386.2914, found 386.2910;

**IR** (neat) 3323, 2961, 2927, 2858, 1642, 1590, 1570, 1496, 1378, 1305, 1172, 1124, 751, 624  $\text{cm}^{-1}$ .



### Guanidine G-PiPy

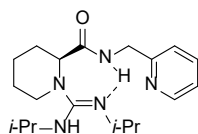

1.4 mmol scale, 243 mg, pale yellow oil, 49% yield.  $[\alpha]_D^{20} = -14.0$  (c 0.60, CH<sub>2</sub>Cl<sub>2</sub>).

**<sup>1</sup>H NMR** (400 MHz, CDCl<sub>3</sub>)  $\delta$  8.55 (d,  $J = 4.8$  Hz, 1H), 8.24 (brs, 1H), 7.65 (t,  $J = 7.6$  Hz, 1H), 7.36 (d,  $J = 8.0$  Hz, 1H), 7.25 - 7.12 (m, 1H), 5.85 (brs, 1H), 3.99 (brs, 3H), 3.28 - 3.23 (m, 1H), 3.13 - 3.03 (m, 1H), 2.75 - 2.61 (m, 1H), 1.96 - 1.89 (m, 1H), 1.81 - 1.78 (m, 1H), 1.57 - 1.55 (m, 1H), 1.52 - 1.38 (m, 3H), 1.19 - 0.92 (m, 12H).

**<sup>13</sup>C NMR** (101 MHz, CDCl<sub>3</sub>)  $\delta$  173.0, 152.2, 148.9, 148.8, 136.9, 122.6, 121.8, 60.1, 45.9, 45.8, 29.8, 26.1, 26.0, 24.8, 24.1, 24.0, 23.3, 22.6.

**HR-MS** (ESI) calcd for C<sub>19</sub>H<sub>32</sub>N<sub>5</sub>O<sup>+</sup> ([M+H]<sup>+</sup>): 346.2601, found 346.2596;

**IR** (neat) 3344, 2961, 2929, 2857, 1638, 2589, 1498, 1436, 1378, 1171, 1126, 752, 619 cm<sup>-1</sup>.

### Guanidine G-TqPy

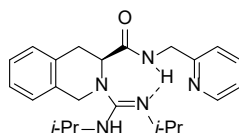

2.0 mmol scale, 258 mg, pale yellow oil, 33% yield.  $[\alpha]_D^{21} = -58.3$  (c 0.40, CH<sub>2</sub>Cl<sub>2</sub>).

**<sup>1</sup>H NMR** (400 MHz, CDCl<sub>3</sub>)  $\delta$  8.82 (s, 1H), 8.61 - 8.50 (m, 1H), 7.65 (q,  $J = 8.0$  Hz, 1H), 7.41 - 7.31 (m, 1H), 7.21 - 7.20 (m, 1H), 7.17 - 7.13 (m, 3H), 7.08 - 7.02 (m, 1H), 5.88 (s, 1H), 4.23 - 3.36 (m, 6H), 3.24 - 3.12 (m, 1H), 2.92 - 2.81 (m, 1H), 1.20 - 0.93 (m, 12H).

**<sup>13</sup>C NMR** (101 MHz, CDCl<sub>3</sub>)  $\delta$  172.2, 152.4, 149.0, 148.9, 137.0, 135.9, 135.8, 134.2, 134.1, 129.2, 126.4, 126.3, 126.1, 125.7, 125.6, 122.7, 121.8, 56.6, 56.5, 47.6, 47.5, 45.0, 31.1, 24.8, 23.3.

**HR-MS** (ESI) calcd for C<sub>23</sub>H<sub>32</sub>N<sub>5</sub>O<sup>+</sup> ([M+H]<sup>+</sup>): 394.2601, found 394.2599;

**IR** (neat) 3338, 2963, 2927, 1638, 1589, 1495, 1435, 1379, 1249, 1172, 1125, 996, 747, 626 cm<sup>-1</sup>.

### Guanidine G-TqPy-oMe

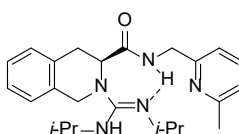

1.0 mmol scale, 283 mg, pale yellow oil, 70% yield.  $[\alpha]_D^{21} = -59.8$  (c 0.40, CH<sub>2</sub>Cl<sub>2</sub>).

**<sup>1</sup>H NMR** (400 MHz, CDCl<sub>3</sub>)  $\delta$  8.59 (s, 1H), 7.52 (q,  $J = 8.2$  Hz, 1H), 7.21 - 7.08 (m, 4H), 7.06 - 7.02 (m, 2H), 5.85 (s, 1H), 4.43 - 3.37 (m, 7H), 3.16 (dt,  $J = 12.8, 4.4$  Hz, 1H), 2.87 (dt,  $J = 16.4, 10.8$  Hz, 1H), 2.54 (d,  $J = 4.8$  Hz, 3H), 1.18 - 0.96 (m, 12H).

**<sup>13</sup>C NMR** (101 MHz, CDCl<sub>3</sub>)  $\delta$  172.1, 157.7, 152.2, 137.2, 135.8, 135.7, 134.2, 134.1, 129.3, 129.2, 126.4, 126.1, 125.6, 122.1, 118.6, 56.6, 47.6, 31.1, 24.4, 24.4, 24.4, 22.4.

**HR-MS** (ESI) calcd for C<sub>24</sub>H<sub>34</sub>N<sub>5</sub>O<sup>+</sup> ([M+H]<sup>+</sup>): 408.2758, found 408.2752;

**IR** (neat) 3335, 2963, 2926, 1640, 1576, 1496, 1455, 1377, 1257, 1173, 1125, 747 cm<sup>-1</sup>.

### Guanidine G-TqPy<sup>Me2</sup>

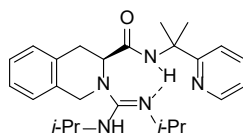

2.0 mmol scale, 455 mg, white solid, m. p. 88.3-89.3 °C, 54% yield.  $[\alpha]_D^{21} = -69.0$  (c 0.20, CH<sub>2</sub>Cl<sub>2</sub>).

**<sup>1</sup>H NMR** (400 MHz, CDCl<sub>3</sub>) δ 9.80 (s, 1H), 8.51 - 8.42 (m, 1H), 7.53 (td, *J* = 7.6, 2.0 Hz, 1H), 7.29 (d, *J* = 8.0 Hz, 1H), 7.15 - 7.09 (m, 3H), 7.06 - 7.01 (m, 2H), 4.81 (d, *J* = 6.0 Hz, 1H), 4.47 - 4.28 (m, 2H), 3.55 - 3.22 (m, 4H), 2.95 (dd, *J* = 16.0, 6.4 Hz, 1H), 1.66 (s, 3H), 1.63 (s, 3H), 1.13 (m, 12H).

**<sup>13</sup>C NMR** (101 MHz, CDCl<sub>3</sub>) δ 171.2, 165.2, 155.5, 148.1, 136.2, 134.4, 132.8, 128.8, 126.5, 125.6, 125.4, 121.1, 119.3, 57.0, 55.5, 47.2, 47.0, 29.4, 28.5, 27.9, 24.4.

**HR-MS** (ESI) calcd for C<sub>25</sub>H<sub>36</sub>N<sub>5</sub>O<sup>+</sup> ([M+H]<sup>+</sup>): 422.2914, found 422.2909;

**IR** (neat) 3346, 2964, 1672, 1620, 1502, 1457, 1398, 1360, 1310, 1274, 1237, 1125, 1084, 990, 748 cm<sup>-1</sup>.

### Guanidine G-TqPy<sup>(S)-tBu</sup>

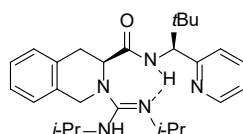

2.0 mmol scale, 433 mg, white solid, m. p. 150.1-151.7 °C, 48% yield.  $[\alpha]_D^{21} = -112.5$  (c 0.20, CH<sub>2</sub>Cl<sub>2</sub>).

**<sup>1</sup>H NMR** (400 MHz, CDCl<sub>3</sub>) δ 9.65 (d, *J* = 9.2 Hz, 1H), 8.54 (dd, *J* = 4.8, 1.8 Hz, 1H), 7.55 (td, *J* = 7.6, 1.9 Hz, 1H), 7.21 - 7.08 (m, 5H), 7.06 - 7.03 (m, 1H), 4.85 - 4.80 (m, 2H), 4.56 - 4.28 (m, 2H), 3.46 (s, 1H), 3.37 - 3.31 (m, 3H), 2.91 (dd, *J* = 15.9, 6.4 Hz, 1H), 1.25 - 1.23 (m, 6H), 1.15 - 1.13 (m, 3H), 1.09 - 0.98 (m, 3H), 0.85 (s, 9H).

**<sup>13</sup>C NMR** (101 MHz, CDCl<sub>3</sub>) δ 171.9, 159.9, 155.2, 148.4, 135.2, 134.6, 132.7, 128.9, 126.4, 125.7, 125.4, 123.4, 121.6, 62.5, 55.4, 47.6, 47.1, 46.7, 35.2, 29.6, 27.2, 25.5, 24.4, 24.2, 23.2.

**HR-MS** (ESI) calcd for C<sub>27</sub>H<sub>40</sub>N<sub>5</sub>O<sup>+</sup> ([M+H]<sup>+</sup>): 450.3227, found 450.3225;

**IR** (neat) 13354, 2963, 2867, 1667, 1624, 1537, 1472, 1398, 1362, 1309, 1228, 1164, 1084, 992, 749 cm<sup>-1</sup>.

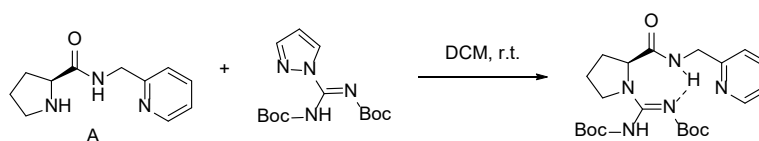

**General Procedure for the synthesis of N-EWG guanidine.** In an over-dried RB flask, amide A (1.0 mmol, 1.0 equiv.) and *N,N*-di-Boc-pyrazole-1-carbodiimide (1 mmol, 1.0 equiv.) was dissolved in DCM (10 mL). The reaction mixture was stirred for 48 h. Then, concentrated under reduced pressure. The residue was then purified by flash chromatography on silica gel (eluent: PE/EtOAc = 2:1) afforded the corresponding guanidine.

### Guanidine G<sup>3</sup>-PrPy

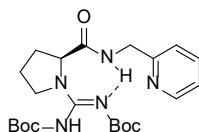

1.0 mmol scale, 173 mg, colorless oil, 39% yield.  $[\alpha]_D^{22} = -84.0$  (c 0.20, CH<sub>2</sub>Cl<sub>2</sub>).

**<sup>1</sup>H NMR** (400 MHz, CDCl<sub>3</sub>) δ 10.04 (s, 1H), 8.52 (d, *J* = 4.8 Hz, 1H), 7.81 (s, 1H), 7.65 - 7.61 (m, 1H), 7.34 - 7.25 (m, 1H), 7.17 - 7.14 (m, 1H), 4.96 (s, 1H), 4.70 (dd, *J* = 16.2, 6.4 Hz, 1H), 4.48 (dd, *J* = 16.2, 5.2 Hz, 1H), 3.71 (dt, *J* = 11.2, 7.2 Hz, 1H), 3.55 (dt, *J* = 12.0, 6.6 Hz, 1H), 2.47 (s, 1H), 2.30 - 2.17 (m, 2H), 2.06 - 1.99 (m, 1H), 1.94 - 1.83 (m, 1H), 1.45 (s, 18H).

**<sup>13</sup>C NMR** δ 171.5, 157.4, 154.6, 148.9, 136.6, 122.0, 121.3, 61.6, 49.7, 44.8, 29.2, 28.0, 24.4.

**HR-MS** (ESI) calcd for C<sub>22</sub>H<sub>34</sub>N<sub>5</sub>O<sub>5</sub><sup>+</sup> ([M+H]<sup>+</sup>): 448.2554, found 448.2548;

**IR** (neat) 3299, 2976, 1726, 1649, 1595, 1544, 1453, 1389, 1364, 1304, 1252, 1169, 1132, 803, 755 cm<sup>-1</sup>.

#### Guanidine G<sup>4</sup>-PrPy

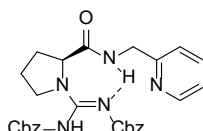

1.0 mmol scale, 195 mg, white solid, m. p. 136.2-137.6 °C, 38% yield. [ $\alpha$ ]<sub>D</sub><sup>21</sup> = -87.0 (c 0.20, CH<sub>2</sub>Cl<sub>2</sub>).

**<sup>1</sup>H NMR** (400 MHz, CDCl<sub>3</sub>) δ 10.45 (s, 1H), 8.41 (d, *J* = 4.8 Hz, 1H), 7.58 (s, 1H), 7.42 - 7.19 (m, 12H), 7.05 (t, *J* = 6.2 Hz, 1H), 5.11 (s, 4H), 4.89 (t, *J* = 7.2 Hz, 1H), 4.63 (dd, *J* = 16.2, 6.0 Hz, 1H), 4.46 (dd, *J* = 16.2, 5.2 Hz, 1H), 3.78 - 3.72 (m, 1H), 3.65 - 3.50 (m, 1H), 2.28 - 2.18 (m, 2H), 2.10 - 1.98 (m, 1H), 1.91 - 1.86 (m, 1H).

**<sup>13</sup>C NMR** (101 MHz, CDCl<sub>3</sub>) δ 171.0, 156.9, 154.8, 148.9, 136.7, 128.4, 128.1, 122.0, 121.3, 67.8, 62.1, 50.1, 44.6, 29.3, 24.4.

**HR-MS** (ESI) calcd for C<sub>28</sub>H<sub>30</sub>N<sub>5</sub>O<sub>5</sub><sup>+</sup> ([M+H]<sup>+</sup>): 516.2241, found 516.2239;

**IR** (neat) 2951, 1751, 1677, 1599, 1503, 1454, 1376, 1268, 1219, 1192, 1128, 1049, 751, 698 cm<sup>-1</sup>.

### 3. Optimization of reaction conditions

Table S1: Screening of chiral guanidines<sup>[a]</sup>.

Reaction scheme: **A1** + **B1**  $\xrightarrow[\text{THF (0.1 M), N}_2, 30\text{ }^\circ\text{C}]{\text{CuI (10 mol\%), Guanidine (12 mol\%), Cs}_2\text{CO}_3 \text{ (2.0 equiv.)}}$  **C1**

**G<sub>2</sub>**

**G<sub>3</sub>**

**G-PrPy**, R<sup>1</sup> = *i*-Pr  
**G<sup>2</sup>-PrPy**, R<sup>1</sup> = Boc  
**G<sup>3</sup>-PrPy**, R<sup>1</sup> = Cbz

**G-qPrPy**

**G-RaPy**, n = 1  
**G-PePy**, n = 2

**G-PiPy**

**G-TqPy<sup>Me2</sup>**

**G-TqPy(S)-*t*Bu**

**G-TqPy**, R<sup>2</sup> = H  
**G-TqPy-OMe**, R<sup>2</sup> = Me  
**G-TqPy-oEt**, R<sup>2</sup> = Et  
**G-TqPy-o<sup>n</sup>Pr**, R<sup>2</sup> = *n*-Pr  
**G-TqPy-o<sup>i</sup>Pr**, R<sup>2</sup> = *i*-Pr

| Entry <sup>[a]</sup> | guanidine                     | Yield [%] <sup>[b]</sup> | <i>er</i> <sup>[c]</sup> |
|----------------------|-------------------------------|--------------------------|--------------------------|
| 1                    | <b>G<sub>2</sub></b>          | -                        | -                        |
| 2                    | <b>G<sub>3</sub></b>          | -                        | -                        |
| 3                    | <b>G-PrPy</b>                 | 34                       | 85:15                    |
| 4                    | <b>G<sup>2</sup>-PrPy</b>     | -                        | -                        |
| 5                    | <b>G<sup>3</sup>-PrPy</b>     | -                        | -                        |
| 6                    | <b>G-qPrPy</b>                | 15                       | 78:22                    |
| 7                    | <b>G-RaPy</b>                 | 33                       | 82:18                    |
| 8                    | <b>G-PePy</b>                 | 22                       | 83:17                    |
| 9                    | <b>G-PiPy</b>                 | 55                       | 82:18                    |
| 10                   | <b>G-TqPy</b>                 | 60                       | 92:8                     |
| 11                   | <b>G-TqPy-oMe</b>             | 81                       | 94:6                     |
| 12                   | <b>G-TqPy-oEt</b>             | 72                       | 93.5:6.5                 |
| 13                   | <b>G-TqPy-o<sup>n</sup>Pr</b> | 53                       | 93.5:6.5                 |
| 14                   | <b>G-TqPy-o<sup>i</sup>Pr</b> | 47                       | 93.5:6.5                 |
| 15                   | <b>G-TqPy<sup>Me2</sup></b>   | -                        | -                        |
| 16                   | <b>G-TqPy(S)-<i>t</i>Bu</b>   | -                        | -                        |

[a] Reaction conditions: CuI (10 mol %), Guanidine (12 mol %), **A1** (0.05 mmol), **B1** (0.075 mmol) and Cs<sub>2</sub>CO<sub>3</sub> (0.1 mmol) in THF (0.1 M) under N<sub>2</sub> at 30 °C. [b] <sup>1</sup>H NMR yields using CH<sub>2</sub>Br<sub>2</sub> as an internal standard. [c] the *er* value was determined by HPLC on a chiral stationary phase.

**Table S2: Screening of copper salts and other metal salts.**

| Entry <sup>[a]</sup> | metal salts                                         | Yield [%] <sup>[b]</sup> | <i>er</i> <sup>[c]</sup> |
|----------------------|-----------------------------------------------------|--------------------------|--------------------------|
| 1                    | CuCl                                                | 40                       | 93.5:6.5                 |
| 2                    | CuBr                                                | 69                       | 93.5:6.5                 |
| 3                    | CuI                                                 | 81                       | 94:6                     |
| 4                    | CuTc                                                | 53                       | 94:6                     |
| 5                    | CuOAc                                               | 35                       | 93:7                     |
| 6                    | (CuOTf) <sub>2</sub> PhH                            | 8                        | 93:7                     |
| 7                    | Cu(CH <sub>3</sub> CN) <sub>4</sub> BF <sub>4</sub> | 61                       | 94:6                     |
| 8                    | Cu(CH <sub>3</sub> CN) <sub>4</sub> PF <sub>6</sub> | 51                       | 94:6                     |
| 9                    | Cu(PPh <sub>3</sub> ) <sub>2</sub> BH <sub>4</sub>  | 50                       | 94:6                     |
| 10                   | CuPhenylethynyl                                     | 48                       | 94:6                     |
| 11                   | CuBr <sub>2</sub>                                   | 41                       | 94:6                     |
| 12                   | FeCl <sub>2</sub>                                   | -                        | -                        |
| 13                   | CoCl <sub>2</sub>                                   | -                        | -                        |
| 14                   | NiCl <sub>2</sub>                                   | -                        | -                        |

[a] Reaction conditions: [M] (10 mol %), **G<sup>2</sup>-TqPy-oMe** (12 mol %), **A1** (0.05 mmol), **B1** (0.075 mmol) and Cs<sub>2</sub>CO<sub>3</sub> (0.1 mmol) in THF (0.1 M) under N<sub>2</sub> at 30 °C. [b] <sup>1</sup>H NMR yields using CH<sub>2</sub>Br<sub>2</sub> as an internal standard. [c] the *er* value was determined by HPLC on a chiral stationary phase.

**Table S3: Screening of solvent.**

| Entry <sup>[a]</sup> | Solvent           | Yield [%] <sup>[b]</sup> | <i>er</i> <sup>[c]</sup> |
|----------------------|-------------------|--------------------------|--------------------------|
| 1                    | THF               | 81                       | 94:6                     |
| 2                    | Et <sub>2</sub> O | trace                    | ND                       |
| 3                    | DCM               | 54                       | 91:9                     |
| 4                    | Toluene           | trace                    | ND                       |
| 5                    | MeCN              | 57                       | 79:21                    |
| 6                    | EtOAc             | 66                       | 88:12                    |
| 7                    | 1,4-dioxane       | 63                       | 93:7                     |
| 8                    | DME               | 45                       | 91:9                     |

[a] Reaction conditions: CuI (10 mol %), **G<sup>2</sup>-TqPy-oMe** (12 mol %), **A1** (0.05 mmol), **B1** (0.075 mmol) and Cs<sub>2</sub>CO<sub>3</sub> (0.1 mmol) in solvent (0.1 M) under N<sub>2</sub> at 30 °C. [b] <sup>1</sup>H NMR yields using CH<sub>2</sub>Br<sub>2</sub> as an internal standard. [c] the *er* value was determined by HPLC on a chiral stationary phase.

**Table S4: Screening of base.**

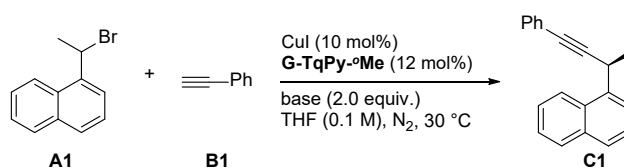

| Entry <sup>[a]</sup> | base                                          | Yield [%] <sup>[b]</sup> | <i>er</i> <sup>[c]</sup> |
|----------------------|-----------------------------------------------|--------------------------|--------------------------|
| 1                    | Na <sub>2</sub> CO <sub>3</sub>               | trace                    | ND                       |
| 2                    | K <sub>2</sub> CO <sub>3</sub>                | 36                       | 91:9                     |
| 3                    | K <sub>3</sub> PO <sub>4</sub>                | 50                       | 93:7                     |
| 4                    | Cs <sub>2</sub> CO <sub>3</sub>               | 81                       | 94:6                     |
| 5                    | Cs <sub>2</sub> CO <sub>3</sub> + KI (0.5 eq) | -                        | -                        |
| 6                    | KO <sup>t</sup> Bu                            | -                        | -                        |
| 7                    | KOH                                           | 19                       | 77:23                    |
| 8                    | DABCO                                         | -                        | -                        |
| 9                    | DIPEA                                         | -                        | -                        |

[a] Reaction conditions: Cul (10 mol %), **G<sup>2</sup>-TqPy-*o*Me** (12 mol %), **A1** (0.05 mmol), **B1** (0.075 mmol) and base (0.1 mmol) in THF (0.1 M) under N<sub>2</sub> at 30 °C. [b] <sup>1</sup>H NMR yields using CH<sub>2</sub>Br<sub>2</sub> as an internal standard. [c] the *er* value was determined by HPLC on a chiral stationary phase.

## 4. Full list of the coupling products.

Table S5: Full list of the scope of alkynes.

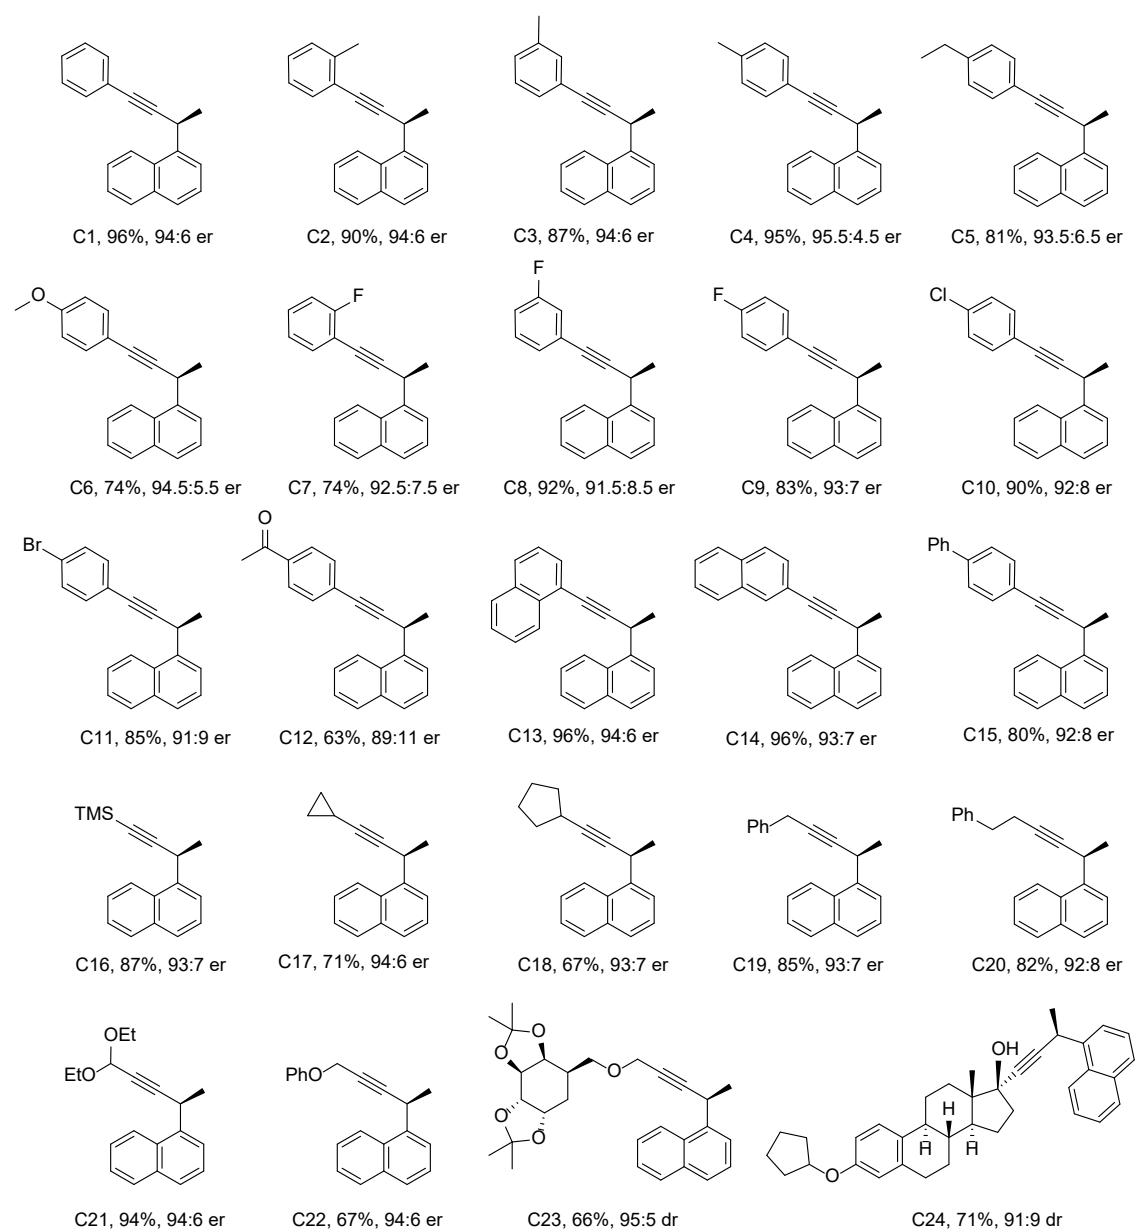

Table S6: Full list of the scope of alkyl bromides.

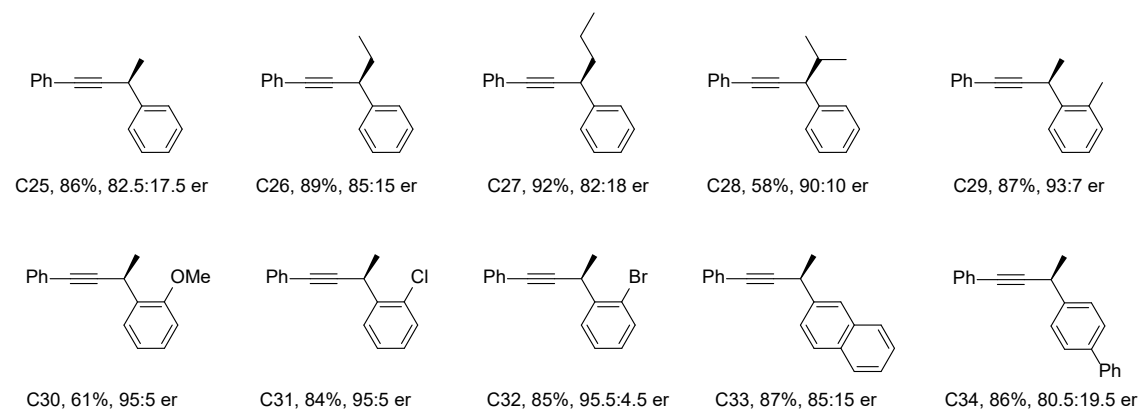

## 5. General procedure for the catalytic reactions

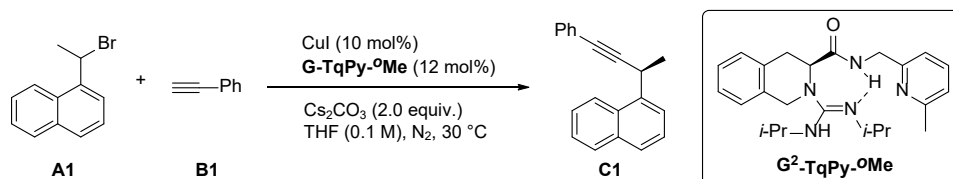

### 1. General procedure A:

Under nitrogen atmosphere, an over-dried reaction tube charged with alkyl halide (0.20 mmol, 1.0 equiv.), **CuI** (10 mol %), **G<sup>2</sup>-TqPy-OMe** (12 mol %), **Cs<sub>2</sub>CO<sub>3</sub>** (2.0 equiv.), and anhydrous THF (1.0 mL). Then, alkyne (0.24 mmol, 1.2 equiv.) was sequentially added to the mixture and the reaction mixture was stirred at 30 °C for 24 to 72 h. Upon completion (monitored by TLC), THF was evaporated in vacuo, then the crude mixture was purified by flash chromatography on silica gel (eluent: PE) to afford the desired product.

### 2. General procedure B:

Under nitrogen atmosphere, an over-dried reaction tube charged with alkyl halide (0.24 mmol, 1.2 equiv.), **CuI** (10 mol %), **G<sup>2</sup>-TqPy-OMe** (12 mol %), **Cs<sub>2</sub>CO<sub>3</sub>** (2.0 equiv.), and anhydrous THF (1.0 mL). Then, alkyne (0.20 mmol, 1.0 equiv.) was sequentially added to the mixture and the reaction mixture was stirred at 30 °C for 24 to 72 h. Upon completion (monitored by TLC), THF was evaporated in vacuo, then the crude mixture was purified by flash chromatography on silica gel (eluent: PE) to afford the desired product.

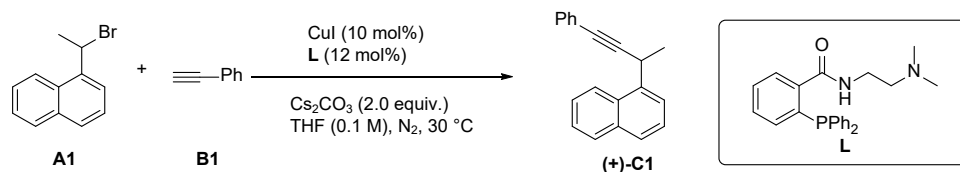

### 3. General procedure for the racemic coupling reaction:

Under nitrogen atmosphere, an over-dried reaction tube charged with alkyl halide (0.10 mmol, 1.0 equiv.), **CuI** (10 mol %), **L** (12 mol %), **Cs<sub>2</sub>CO<sub>3</sub>** (2.0 equiv.), and anhydrous THF (1.0 mL). Then, alkyne (0.15 mmol, 1.5 equiv.) was sequentially added to the mixture and the reaction mixture was stirred at 30 °C for 24 h. Upon completion (monitored by TLC), THF was evaporated in vacuo, then the crude mixture was purified by flash chromatography on silica gel (eluent: PE) to afford the desired product.



## 6. Characterization of the products

### (S)-1-(4-phenylbut-3-yn-2-yl)naphthalene (C1)

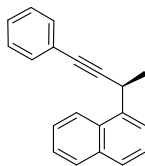

General procedure A for 48 h.

0.2 mmol scale; 49.1 mg, colorless oil, 96% yield, 94:6 *er*,  $[\alpha]_D^{20} = +73.4$  (c 0.98, CH<sub>2</sub>Cl<sub>2</sub>).

**HPLC** Chiralcel OD-H, hexane/isopropanol = 99/1, 1.0 mL/min,  $\lambda = 254$  nm,  $t_1 = 6.70$  min,  $t_2 = 8.10$  min.

**<sup>1</sup>H NMR** (400 MHz, CDCl<sub>3</sub>)  $\delta$  8.16 (d,  $J = 8.0$  Hz, 1H), 7.86 (d,  $J = 8.0$  Hz, 1H), 7.81 (d,  $J = 7.2$  Hz, 1H), 7.75 (d,  $J = 8.0$  Hz, 1H), 7.55 - 7.50 (m, 1H), 7.49 - 7.43 (m, 4H), 7.27 - 7.26 (m, 3H), 4.72 (q,  $J = 7.2$  Hz, 1H), 1.72 (d,  $J = 7.2$  Hz, 3H).

**<sup>13</sup>C NMR** (101 MHz, CDCl<sub>3</sub>)  $\delta$  138.8, 134.0, 131.6, 130.5, 129.0, 128.2, 127.7, 127.5, 126.0, 125.7, 125.5, 124.3, 123.8, 123.2, 92.8, 82.7, 29.1, 23.4.

**HR-MS** (ESI) calcd for C<sub>16</sub>H<sub>17</sub><sup>+</sup> ( $[M+H]^+$ ): 257.1325, found 257.1329;

**IR** (neat) 3054, 2977, 2929, 1597, 1489, 1445, 1395, 1263, 896, 798, 776, 731, 701, 456 cm<sup>-1</sup>.

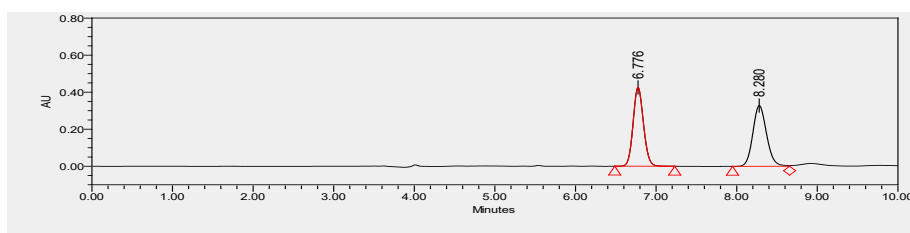

|   | Retention Time | Area    | % Area |
|---|----------------|---------|--------|
| 1 | 6.776          | 3806864 | 49.53  |
| 2 | 8.280          | 3879831 | 50.47  |

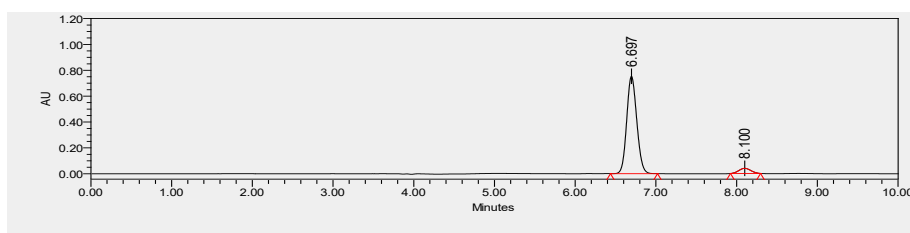

|   | Retention Time | Area    | % Area |
|---|----------------|---------|--------|
| 1 | 6.697          | 6523769 | 94.05  |
| 2 | 8.100          | 413072  | 5.95   |

**(S)-1-(4-(o-tolyl)but-3-yn-2-yl)naphthalene (C2)**

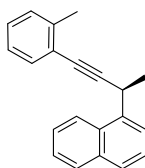

General procedure A for 48 h.

0.2 mmol scale; 48.9 mg, colorless oil, 90% yield, 94:6 *er*,  $[\alpha]_D^{20} = +72.3$  (c 0.98, CH<sub>2</sub>Cl<sub>2</sub>).

**HPLC** Chiralcel OD-H, hexane/isopropanol = 99/1, 1.0 mL/min,  $\lambda = 254$  nm,  $t_1 = 5.75$  min,  $t_2 = 7.21$  min

**<sup>1</sup>H NMR** (400 MHz, CDCl<sub>3</sub>)  $\delta$  8.18 (d,  $J = 8.4$  Hz, 1H), 7.87 (d,  $J = 8.0$  Hz, 1H), 7.83 (d,  $J = 7.2$  Hz, 1H), 7.75 (d,  $J = 8.0$  Hz, 1H), 7.55 - 7.51 (m, 1H), 7.49 - 7.44 (m, 2H), 7.42 (d,  $J = 7.2$  Hz, 1H), 7.17 - 7.16 (m, 2H), 7.12 - 7.08 (m, 1H), 4.77 (q,  $J = 7.2$  Hz, 1H), 2.43 (s, 3H), 1.74 (d,  $J = 7.2$  Hz, 3H).

**<sup>13</sup>C NMR** (101 MHz, CDCl<sub>3</sub>)  $\delta$  140.0, 139.0, 134.0, 131.9, 130.6, 129.3, 129.0, 127.7, 127.4, 126.0, 125.6, 125.5, 125.4, 124.3, 123.5, 123.2, 96.8, 81.6, 29.3, 23.5, 20.8.

**HR-MS** (ESI) calcd for C<sub>21</sub>H<sub>19</sub><sup>+</sup> ([M+H]<sup>+</sup>): 271.1481, found 271.1489;

**IR** (neat) 3058, 2975, 2928, 1597, 1510, 1485, 1452, 1395, 1309, 1164, 1118, 985, 797, 776, 756, 451 cm<sup>-1</sup>.

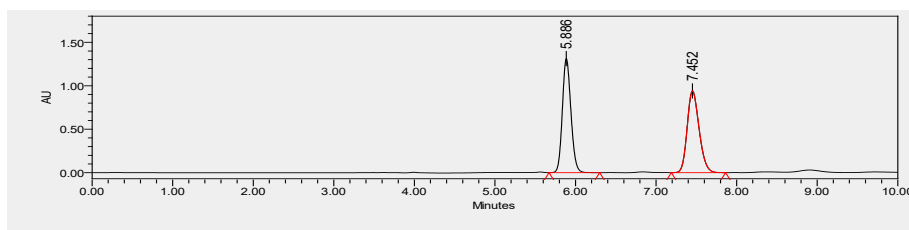

|   | Retention Time | Area    | % Area |
|---|----------------|---------|--------|
| 1 | 5.886          | 9713938 | 50.12  |
| 2 | 7.452          | 9666508 | 49.88  |

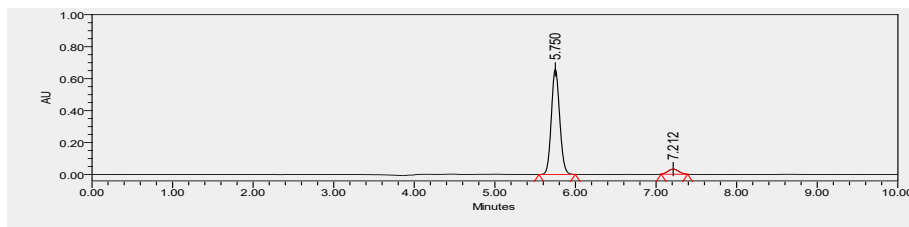

|   | Retention Time | Area    | % Area |
|---|----------------|---------|--------|
| 1 | 5.750          | 4731770 | 94.05  |
| 2 | 7.212          | 299471  | 5.95   |

**(S)-1-(4-(m-tolyl)but-3-yn-2-yl)naphthalene (C3)**

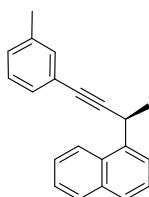

General procedure A for 48 h.

0.2 mmol scale; 46.9 mg, colorless oil, 87% yield, 94:6 *er*,  $[\alpha]_D^{20} = +76.4$  (c 0.94, CH<sub>2</sub>Cl<sub>2</sub>).

**HPLC** Chiralcel OD-H, hexane/isopropanol = 99/1, 1.0 mL/min,  $\lambda = 254$  nm,  $t_1 = 6.27$  min,  $t_2 = 7.66$  min

**<sup>1</sup>H NMR** (400 MHz, CDCl<sub>3</sub>)  $\delta$  8.16 (d,  $J = 8.4$  Hz, 1H), 7.86 (d,  $J = 8.0$  Hz, 1H), 7.81 (d,  $J = 7.2$  Hz, 1H), 7.75 (d,  $J = 8.0$  Hz, 1H), 7.55 – 7.51 (m, 1H), 7.49 - 7.44 (m, 2H), 7.28 - 7.25 (m, 2H), 7.17 (t,  $J = 7.6$  Hz, 1H), 7.08 - 7.07 (m, 1H), 4.72 (q,  $J = 7.2$  Hz, 1H), 2.30 (s, 3H), 1.72 (d,  $J = 7.2$  Hz, 3H).

**<sup>13</sup>C NMR** (101 MHz, CDCl<sub>3</sub>)  $\delta$  138.9, 137.8, 134.0, 132.2, 130.6, 129.0, 128.7, 128.6, 128.1, 127.4, 126.0, 125.7, 125.5, 124.3, 123.5, 123.2, 92.4, 82.8, 29.1, 23.4, 21.2.

**HR-MS** (ESI) calcd for C<sub>21</sub>H<sub>19</sub><sup>+</sup> ([M+H]<sup>+</sup>): 271.1481, found 271.1487;

**IR** (neat) 3044, 2975, 2927, 1599, 1510, 1484, 1450, 1395, 1372, 1309, 1000, 860, 777, 691, 503, 455 cm<sup>-1</sup>.

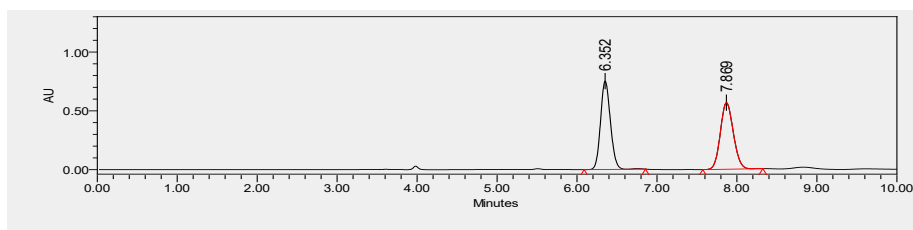

|   | Retention Time | Area    | % Area |
|---|----------------|---------|--------|
| 1 | 6.352          | 6482340 | 50.40  |
| 2 | 7.869          | 6378385 | 49.60  |

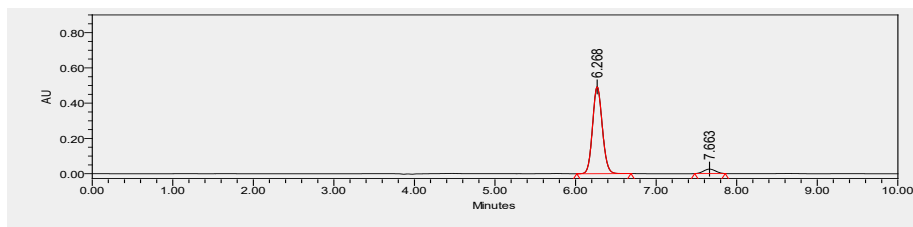

|   | Retention Time | Area    | % Area |
|---|----------------|---------|--------|
| 1 | 6.268          | 4144309 | 94.03  |
| 2 | 7.663          | 263231  | 5.97   |

**(S)-1-(4-(p-tolyl)but-3-yn-2-yl)naphthalene (C4)**

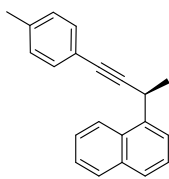

General procedure A for 48 h.

0.2 mmol scale; 51.1 mg, colorless oil, 95% yield, 94.5:5.5 *er*;  $[\alpha]_D^{20} = +81.1$  (*c* 1.02, CH<sub>2</sub>Cl<sub>2</sub>).

**HPLC** Chiralcel OD-H, hexane/isopropanol = 99/1, 1.0 mL/min,  $\lambda = 254$  nm,  $t_1 = 6.42$  min,  $t_2 = 8.36$  min

**<sup>1</sup>H NMR** (400 MHz, CDCl<sub>3</sub>)  $\delta$  8.16 (d, *J* = 8.4 Hz, 1H), 7.87 - 7.85 (m, 1H), 7.82 - 7.80 (m, 1H), 7.75 (d, *J* = 8.0 Hz, 1H), 7.55 - 7.50 (m, 1H), 7.49 - 7.44 (m, 2H), 7.34 (d, *J* = 8.0 Hz, 2H), 7.08 (d, *J* = 8.0 Hz, 2H), 4.71 (q, *J* = 7.2 Hz, 1H), 2.32 (s, 3H), 1.71 (d, *J* = 7.2 Hz, 3H).

**<sup>13</sup>C NMR** (101 MHz, CDCl<sub>3</sub>)  $\delta$  139.0, 137.7, 134.0, 131.5, 130.6, 128.9, 127.4, 126.0, 125.7, 125.4, 124.3, 123.2, 120.7, 92.0, 82.7, 29.1, 23.4, 21.4.

**HR-MS** (ESI) calcd for C<sub>21</sub>H<sub>19</sub><sup>+</sup> ([M+H]<sup>+</sup>): 271.1481, found 271.1482;

**IR** (neat) 3047, 2975, 2926, 1596, 1509, 1450, 1395, 1372, 1308, 1103, 816, 797, 776, 533, 447 cm<sup>-1</sup>.

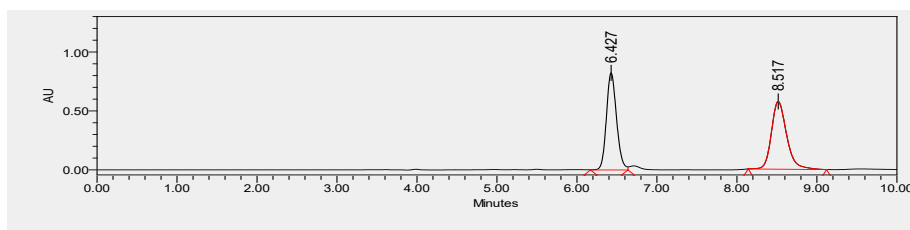

|   | Retention Time | Area    | % Area |
|---|----------------|---------|--------|
| 1 | 6.427          | 7238632 | 48.83  |
| 2 | 8.517          | 7584342 | 51.17  |

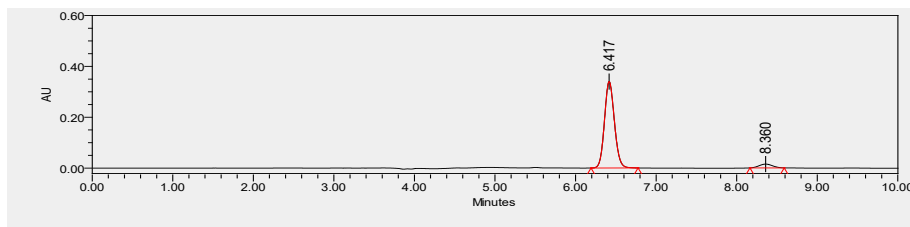

|   | Retention Time | Area    | % Area |
|---|----------------|---------|--------|
| 1 | 6.417          | 2911585 | 94.47  |
| 2 | 8.360          | 170302  | 5.53   |

**(S)-1-(4-(4-ethylphenyl)but-3-yn-2-yl)naphthalene (C5)**

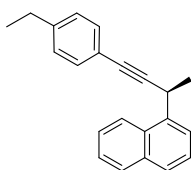

General procedure A for 48 h.

0.2 mmol scale; 46.2 mg, colorless oil, 81% yield, 93.5:6.5 *er*,  $[\alpha]_D^{20} = +77.8$  (c 0.92, CH<sub>2</sub>Cl<sub>2</sub>).

**HPLC** Chiralcel OD-H, hexane/isopropanol = 99/1, 1.0 mL/min,  $\lambda = 254$  nm,  $t_1 = 6.03$  min,  $t_2 = 8.15$  min

**<sup>1</sup>H NMR** (400 MHz, CDCl<sub>3</sub>)  $\delta$  8.16 (d,  $J = 8.4$  Hz, 1H), 7.88 - 7.81 (m, 2H), 7.75 (d,  $J = 8.2$  Hz, 1H), 7.55 - 7.51 (m, 1H), 7.50 - 7.44 (m, 2H), 7.41 - 7.34 (m, 2H), 7.12 - 7.10 (m, 2H), 4.72 (q,  $J = 7.2$  Hz, 1H), 2.61 (q,  $J = 7.6$  Hz, 2H), 1.72 (d,  $J = 7.2$  Hz, 3H), 1.20 (t,  $J = 7.6$  Hz, 3H).

**<sup>13</sup>C NMR** (101 MHz, CDCl<sub>3</sub>)  $\delta$  144.1, 139.0, 133.9, 131.6, 130.5, 128.9, 127.8, 127.4, 126.0, 125.7, 125.4, 124.3, 123.2, 120.9, 92.0, 82.7, 29.1, 28.7, 23.4, 15.4.

**HR-MS** (ESI) calcd for C<sub>22</sub>H<sub>21</sub><sup>+</sup> ([M+H]<sup>+</sup>): 285.1638, found 285.1635;

**IR** (neat) 3051, 2968, 2930, 1596, 1510, 1451, 1395, 1263, 833, 798, 776, 733, 703, 553, 436 cm<sup>-1</sup>.

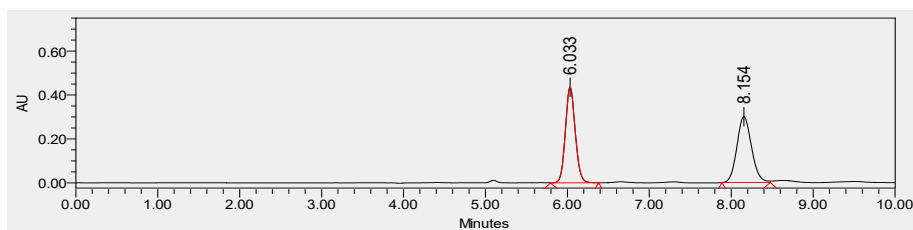

|   | Retention Time | Area    | % Area |
|---|----------------|---------|--------|
| 1 | 6.033          | 3630806 | 49.33  |
| 2 | 8.154          | 3728751 | 50.67  |

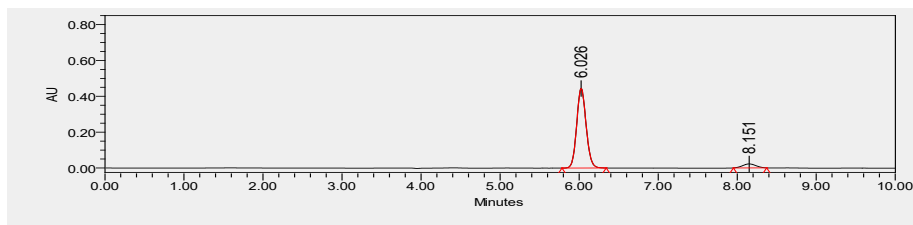

|   | Retention Time | Area    | % Area |
|---|----------------|---------|--------|
| 1 | 6.026          | 3694660 | 93.49  |
| 2 | 8.151          | 257202  | 6.51   |

**(S)-1-(4-(4-methoxyphenyl)but-3-yn-2-yl)naphthalene (C6)**

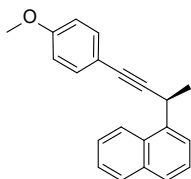

General procedure A for 48 h.

0.2 mmol scale; 41.4 mg, colorless oil, 74% yield, 94.5:5.5 *er*,  $[\alpha]_D^{20} = +85.7$  (c 0.83, CH<sub>2</sub>Cl<sub>2</sub>).

**HPLC** Chiralcel OD-H, hexane/isopropanol = 99/1, 1.0 mL/min,  $\lambda = 254$  nm,  $t_1 = 11.58$  min,  $t_2 = 14.41$  min

**<sup>1</sup>H NMR** (400 MHz, CDCl<sub>3</sub>)  $\delta$  8.18 (d,  $J = 8.4$  Hz, 1H), 7.88 (d,  $J = 7.6$  Hz, 1H), 7.82 (d,  $J = 7.2$  Hz, 1H), 7.76 (d,  $J = 8.2$  Hz, 1H), 7.56 - 7.52 (m, 1H), 7.51 - 7.45 (m, 2H), 7.43 - 7.36 (m, 2H), 6.87 - 6.78 (m, 2H), 4.72 (q,  $J = 7.2$  Hz, 1H), 3.78 (s, 3H), 1.72 (d,  $J = 7.2$  Hz, 3H).

**<sup>13</sup>C NMR** (101 MHz, CDCl<sub>3</sub>)  $\delta$  159.1, 139.0, 133.9, 133.0, 130.5, 128.9, 127.4, 126.0, 125.6, 125.4, 124.3, 123.2, 115.8, 113.8, 91.2, 82.4, 55.2, 29.0, 23.4.

**HR-MS** (ESI) calcd for C<sub>21</sub>H<sub>19</sub>O<sup>+</sup> ([M+H]<sup>+</sup>): 287.1430, found 287.1429;

**IR** (neat) 3045, 2974, 2931, 1604, 1508, 1459, 1287, 1247, 1173, 1031, 832, 797, 777, 538, 436 cm<sup>-1</sup>.

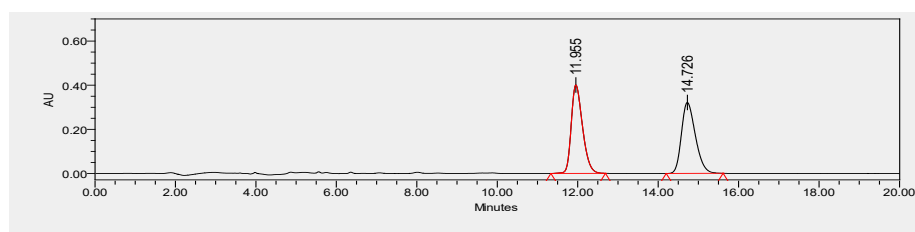

|   | Retention Time | Area    | % Area |
|---|----------------|---------|--------|
| 1 | 11.955         | 7811420 | 50.23  |
| 2 | 14.726         | 7740419 | 49.77  |

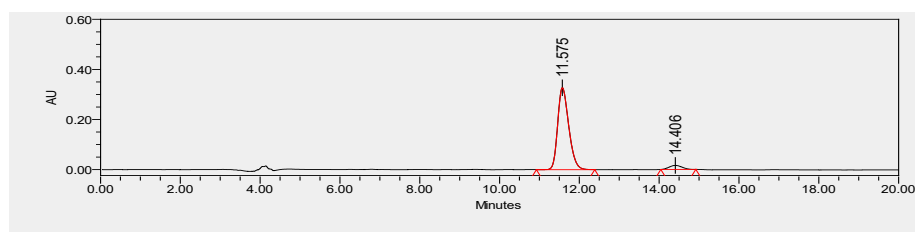

|   | Retention Time | Area    | % Area |
|---|----------------|---------|--------|
| 1 | 11.575         | 6294102 | 94.58  |
| 2 | 14.406         | 360499  | 5.42   |

**(S)-1-(4-(2-fluorophenyl)but-3-yn-2-yl)naphthalene (C7)**

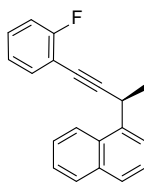

General procedure B for 48 h.

0.2 mmol scale; 40.5 mg, colorless oil, 74% yield, 92.5:7.5 *er*;  $[\alpha]_D^{20} = +65.1$  (c 0.81, CH<sub>2</sub>Cl<sub>2</sub>).

**HPLC** Chiralcel OD-H, hexane/isopropanol = 99/1, 1.0 mL/min,  $\lambda = 254$  nm,  $t_1 = 6.71$  min,  $t_2 = 7.70$  min

**<sup>1</sup>H NMR** (400 MHz, CDCl<sub>3</sub>)  $\delta$  8.16 (d,  $J = 8.4$  Hz, 1H), 7.88 - 7.83 (m, 2H), 7.76 (d,  $J = 8.0$  Hz, 1H), 7.56 - 7.52 (m, 1H), 7.50 - 7.41 (m, 3H), 7.29 - 7.20 (m, 1H), 7.10 - 7.00 (m, 2H), 4.77 (q,  $J = 7.2$  Hz, 1H), 1.74 (d,  $J = 7.2$  Hz, 3H).

**<sup>13</sup>C NMR** (101 MHz, CDCl<sub>3</sub>)  $\delta$  164.1 (d,  $J = 251.6$  Hz, 1C), 138.4, 134.0, 133.5, 130.4, 129.4 (d,  $J = 8.1$  Hz, 1C), 129.0, 127.5, 126.0, 125.7, 125.5, 124.4, 123.8 (d,  $J = 3.7$  Hz, 1C), 123.1, 115.5 (d,  $J = 21.0$  Hz), 112.3 (d,  $J = 15.5$  Hz, 1C), 98.2 (d,  $J = 3.5$  Hz, 1C), 76.1, 29.3, 23.3.

**<sup>19</sup>F NMR** (377 MHz, CDCl<sub>3</sub>)  $\delta$  -110.42.

**HR-MS** (ESI) calcd for C<sub>20</sub>H<sub>16</sub>F<sup>+</sup> ( $[M+H]^+$ ): 275.1231, found 275.1239;

**IR** (neat) 3058, 2977, 2932, 1573, 1491, 1450, 1256, 1214, 1106, 800, 776, 756, 571, 449 cm<sup>-1</sup>.

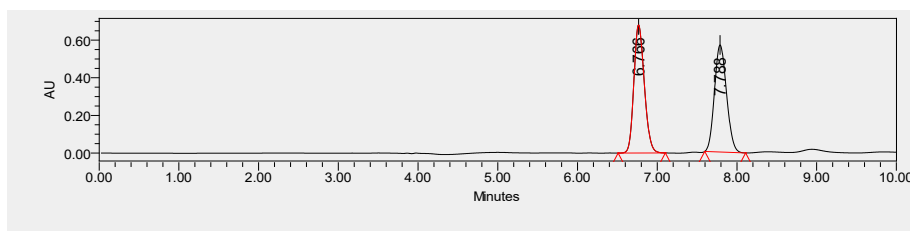

|   | Retention Time | Area    | % Area |
|---|----------------|---------|--------|
| 1 | 6.766          | 6194964 | 50.87  |
| 2 | 7.788          | 5984229 | 49.13  |

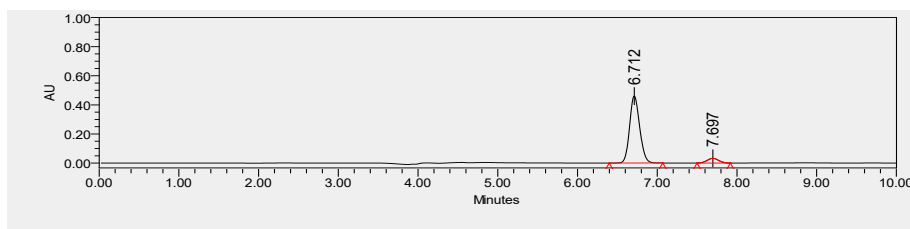

|   | Retention Time | Area    | % Area |
|---|----------------|---------|--------|
| 1 | 6.712          | 4041019 | 92.58  |
| 2 | 7.697          | 323851  | 7.42   |

**(S)-1-(4-(3-fluorophenyl)but-3-yn-2-yl)naphthalene (C8)**

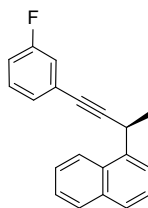

General procedure B for 48 h.

0.2 mmol scale; 50.4 mg, colorless oil, 92% yield, 91.5:8.5 *er*;  $[\alpha]_D^{20} = +80.5$  (c 1.0, CH<sub>2</sub>Cl<sub>2</sub>).

**HPLC** Chiralcel OD-H, hexane/isopropanol = 99/1, 1.0 mL/min,  $\lambda = 254$  nm,  $t_1 = 6.81$  min,  $t_2 = 8.26$  min

**<sup>1</sup>H NMR** (400 MHz, CDCl<sub>3</sub>)  $\delta$  8.14 (d,  $J = 8.4$  Hz, 1H), 7.88 - 7.86 (m, 1H), 7.81 - 7.72 (m, 2H), 7.56 - 7.52 (m, 1H), 7.50 - 7.44 (m, 2H), 7.24 - 7.19 (m, 2H), 7.18 - 7.09 (m, 1H), 7.03 - 6.92 (m, 1H), 4.71 (q,  $J = 7.2$  Hz, 1H), 1.72 (d,  $J = 7.2$  Hz, 3H).

**<sup>13</sup>C NMR** (101 MHz, CDCl<sub>3</sub>)  $\delta$  163.5 (d,  $J = 246.7$  Hz, 1C), 138.4, 134.0, 130.5, 129.8 (d,  $J = 8.7$  Hz, 1C), 129.0, 127.6, 127.50 (d,  $J = 3.0$  Hz, 1C), 126.1, 125.6, 125.4, 124.2, 123.1, 118.5 (d,  $J = 22.5$  Hz, 1C), 115.2 (d,  $J = 21.4$  Hz, 1C), 93.9, 81.5 (d,  $J = 3.5$  Hz, 1C), 29.0, 23.2.

**<sup>19</sup>F NMR** (377 MHz, CDCl<sub>3</sub>)  $\delta$  -113.16

**HR-MS** (ESI) calcd for C<sub>20</sub>H<sub>16</sub>F<sup>+</sup> ( $[M+H]^+$ ): 275.1231, found 275.1232;

**IR** (neat) 3064, 2977, 2931, 1606, 1578, 1485, 1431, 1265, 1150, 1000, 945, 868, 777, 681, 519 cm<sup>-1</sup>.

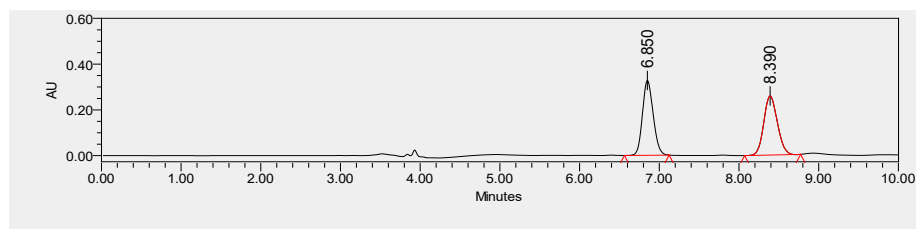

|   | Retention Time | Area    | % Area |
|---|----------------|---------|--------|
| 1 | 6.850          | 3060489 | 50.07  |
| 2 | 8.390          | 3051688 | 49.93  |

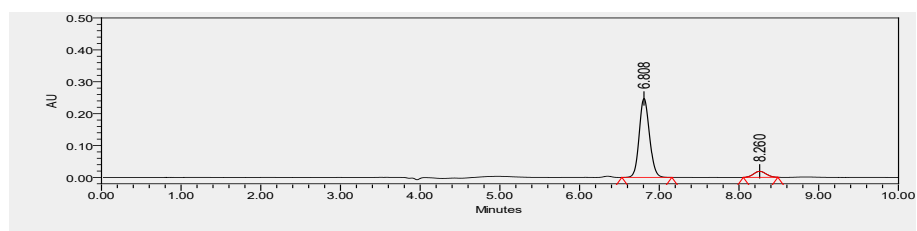

|   | Retention Time | Area    | % Area |
|---|----------------|---------|--------|
| 1 | 6.808          | 2216069 | 91.49  |
| 2 | 8.260          | 206148  | 8.51   |



**(S)-1-(4-(4-fluorophenyl)but-3-yn-2-yl)naphthalene (C9)**

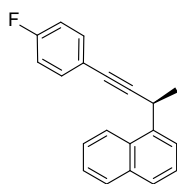

General procedure B for 48 h.

0.2 mmol scale; 45.7 mg, colorless oil, 83% yield, 93:7 *er*,  $[\alpha]_D^{20} = +67.6$  (c 0.91, CH<sub>2</sub>Cl<sub>2</sub>).

**HPLC** Chiralcel OD-H, hexane/isopropanol = 99/1, 1.0 mL/min,  $\lambda = 254$  nm,  $t_1 = 6.57$  min,  $t_2 = 8.64$  min

**<sup>1</sup>H NMR** (400 MHz, CDCl<sub>3</sub>)  $\delta$  8.16 (d,  $J = 8.4$  Hz, 1H), 7.88 - 7.86 (m, 1H), 7.82 - 7.73 (m, 2H), 7.56 - 7.52 (m, 1H), 7.51 - 7.45 (m, 2H), 7.44 - 7.38 (m, 2H), 6.99 - 6.95 (m, 2H), 4.71 (q,  $J = 7.2$  Hz, 1H), 1.72 (d,  $J = 7.2$  Hz, 3H).

**<sup>13</sup>C NMR** (101 MHz, CDCl<sub>3</sub>)  $\delta$  163.39 (d,  $J = 249.3$  Hz, 1C), 138.69, 133.96, 133.45 (d,  $J = 8.1$  Hz, 1C), 130.50, 128.99, 127.53, 126.04, 125.64, 125.52, 124.22, 123.11, 119.77 (d,  $J = 3.6$  Hz, 1C), 115.51 (d,  $J = 21.9$  Hz, 2C), 92.43, 81.53, 28.98, 23.26.

**<sup>19</sup>F NMR** (377 MHz, CDCl<sub>3</sub>)  $\delta$  -111.81

**HR-MS** (ESI) calcd for C<sub>20</sub>H<sub>16</sub>F<sup>+</sup> ( $[M+H]^+$ ): 275.1231, found 275.1237;

**IR** (neat) 3050, 2976, 2929, 1598, 1506, 1451, 1228, 1156, 1094, 835, 798, 776, 532, 446 cm<sup>-1</sup>.

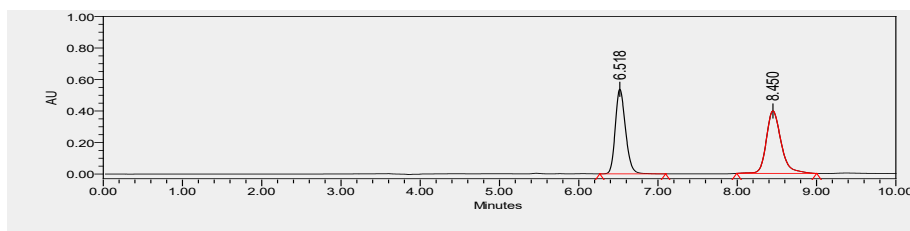

|   | Retention Time | Area    | % Area |
|---|----------------|---------|--------|
| 1 | 6.518          | 4814040 | 48.34  |
| 2 | 8.450          | 5144257 | 51.66  |

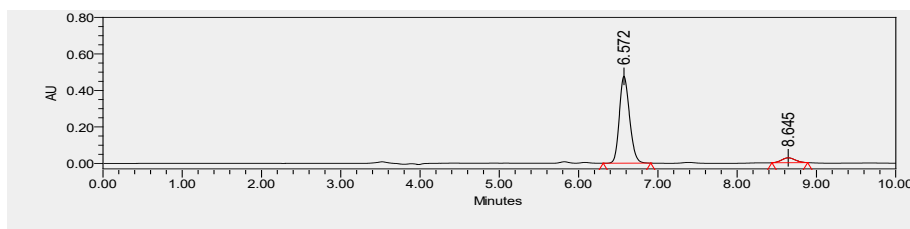

|   | Retention Time | Area    | % Area |
|---|----------------|---------|--------|
| 1 | 6.572          | 4256561 | 93.07  |
| 2 | 8.645          | 317051  | 6.93   |

**(S)-1-(4-(4-chlorophenyl)but-3-yn-2-yl)naphthalene (C10)**

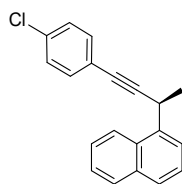

General procedure B for 48 h.

0.2 mmol scale; 52.5 mg, colorless oil, 90% yield, 92:8 *er*,  $[\alpha]_D^{20} = +82.8$  (c 1.05, CH<sub>2</sub>Cl<sub>2</sub>).

**HPLC** Chiralcel OD-H, hexane/isopropanol = 99/1, 1.0 mL/min,  $\lambda = 254$  nm,  $t_1 = 6.74$  min,  $t_2 = 8.96$  min

**<sup>1</sup>H NMR** (400 MHz, CDCl<sub>3</sub>)  $\delta$  8.14 (d,  $J = 8.4$  Hz, 1H), 7.87 (d,  $J = 7.8$  Hz, 1H), 7.77 (t,  $J = 6.8$  Hz, 2H), 7.56 - 7.51 (m, 1H), 7.50 - 7.44 (m, 2H), 7.36 - 7.34 (m, 2H), 7.25 - 7.23 (m, 2H), 4.71 (q,  $J = 7.2$  Hz, 1H), 1.71 (d,  $J = 7.2$  Hz, 3H).

**<sup>13</sup>C NMR** (101 MHz, CDCl<sub>3</sub>)  $\delta$  138.5, 134.0, 133.7, 132.8, 130.5, 129.0, 128.5, 127.6, 126.1, 125.6, 125.5, 124.2, 123.1, 122.2, 93.8, 81.5, 29.0, 23.2.

**HR-MS** (ESI) calcd for C<sub>20</sub>H<sub>16</sub>Cl<sup>+</sup> ([M+H]<sup>+</sup>): 291.0935, found 291.0927;

**IR** (neat) 3052, 2976, 2929, 1595, 1510, 1488, 1395, 1090, 1013, 827, 797, 776, 748, 525, 428 cm<sup>-1</sup>.

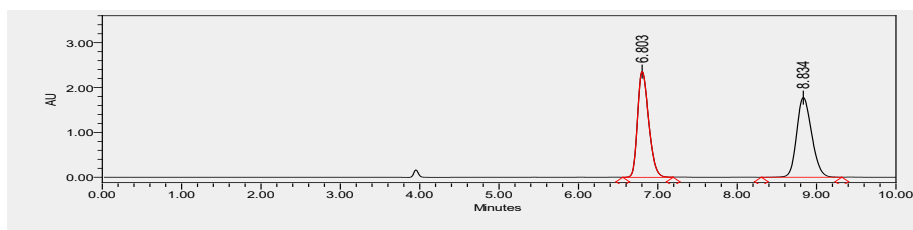

|   | Retention Time | Area     | % Area |
|---|----------------|----------|--------|
| 1 | 6.803          | 23034943 | 49.56  |
| 2 | 8.834          | 23444272 | 50.44  |

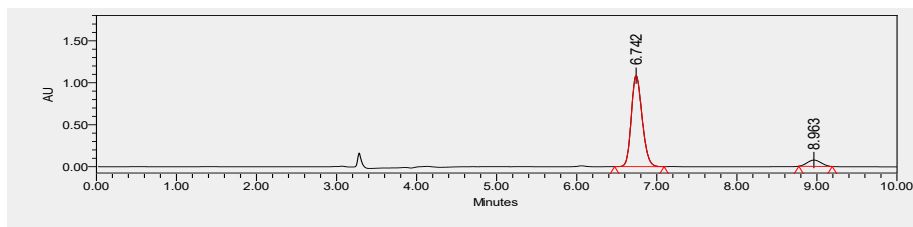

|   | Retention Time | Area     | % Area |
|---|----------------|----------|--------|
| 1 | 6.742          | 10180453 | 91.92  |
| 2 | 8.963          | 894764   | 8.08   |

**(S)-1-(4-(4-bromophenyl)but-3-yn-2-yl)naphthalene (C11)**

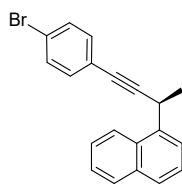

General procedure B for 48 h.

0.2 mmol scale; 56.8 mg, colorless oil, 85% yield, 91:9 *er*,  $[\alpha]_D^{20} = +77.0$  (c 1.14, CH<sub>2</sub>Cl<sub>2</sub>).

**HPLC** Chiralcel OD-H, hexane/isopropanol = 99/1, 1.0 mL/min,  $\lambda = 254$  nm,  $t_1 = 7.35$  min,  $t_2 = 9.83$  min

**<sup>1</sup>H NMR** (400 MHz, CDCl<sub>3</sub>)  $\delta$  8.14 (d,  $J = 8.4$  Hz, 1H), 7.87 (d,  $J = 8.3$  Hz, 1H), 7.80 - 7.74 (m, 2H), 7.56 - 7.51 (m, 1H), 7.50 - 7.44 (m, 2H), 7.42 - 7.37 (m, 2H), 7.30 - 7.28 (m, 2H), 4.70 (q,  $J = 7.2$  Hz, 1H), 1.71 (d,  $J = 7.2$  Hz, 3H).

**<sup>13</sup>C NMR** (101 MHz, CDCl<sub>3</sub>)  $\delta$  138.5, 134.0, 133.1, 131.4, 130.5, 129.0, 127.6, 126.1, 125.6, 125.5, 124.2, 123.1, 122.6, 121.9, 94.0, 81.6, 29.0, 23.2.

**HR-MS** (ESI) calcd for C<sub>20</sub>H<sub>16</sub>Br<sup>+</sup> ([M+H]<sup>+</sup>): 335.0430, 337.0409, found 335.0438, 337.0400;

**IR** (neat) 3050, 2978, 2920, 2850, 1595, 1510, 1394, 1263, 1069, 1009, 824, 798, 777, 738, 523 cm<sup>-1</sup>.

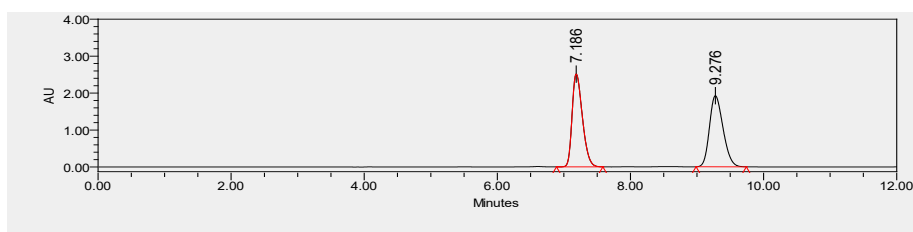

|   | Retention Time | Area     | % Area |
|---|----------------|----------|--------|
| 1 | 7.186          | 27157463 | 49.80  |
| 2 | 9.276          | 27371338 | 50.20  |

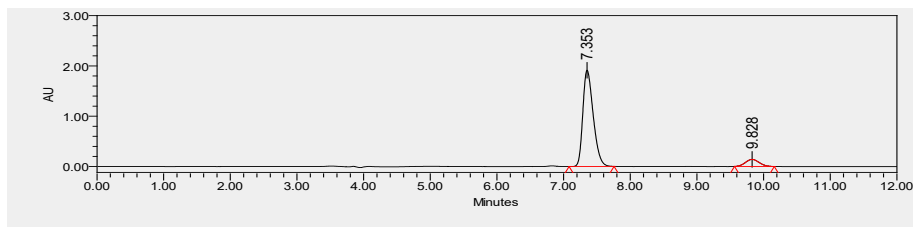

|   | Retention Time | Area     | % Area |
|---|----------------|----------|--------|
| 1 | 7.353          | 20705183 | 91.10  |
| 2 | 9.828          | 2023100  | 8.90   |

**(S)-1-(4-(3-(naphthalen-1-yl)but-1-yn-1-yl)phenyl)ethan-1-one (C12)**

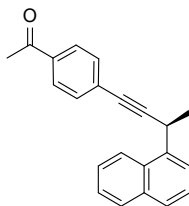

General procedure B for 48 h.

0.2 mmol scale; 37.9 mg, colorless oil, 63% yield, 89:11 *er*;  $[\alpha]_D^{20} = +98.7$  (c 0.76, CH<sub>2</sub>Cl<sub>2</sub>).

**HPLC** Chiralcel OD-H, hexane/isopropanol = 95/5, 1.0 mL/min,  $\lambda = 254$  nm,  $t_1 = 12.55$  min,  $t_2 = 14.33$  min

**<sup>1</sup>H NMR** (400 MHz, CDCl<sub>3</sub>)  $\delta$  8.16 (d,  $J = 8.4$  Hz, 1H), 7.92 - 7.84 (m, 3H), 7.80 - 7.77 (m, 2H), 7.58 - 7.44 (m, 5H), 4.75 (q,  $J = 7.2$  Hz, 1H), 2.57 (s, 3H), 1.74 (d,  $J = 7.2$  Hz, 3H).

**<sup>13</sup>C NMR** (101 MHz, CDCl<sub>3</sub>)  $\delta$  197.4, 138.3, 135.8, 134.0, 131.7, 130.4, 129.0, 128.7, 128.1, 127.6, 126.1, 125.6, 125.6, 124.2, 123.0, 96.5, 82.0, 29.1, 26.6, 23.1.

**HR-MS** (ESI) calcd for C<sub>22</sub>H<sub>19</sub>O<sup>+</sup> ([M+H]<sup>+</sup>): 299.1430, found 299.1430;

**IR** (neat) 3048, 2977, 2931, 2231, 1682, 1600, 1510, 1400, 1357, 1262, 836, 799, 777, 592 cm<sup>-1</sup>.

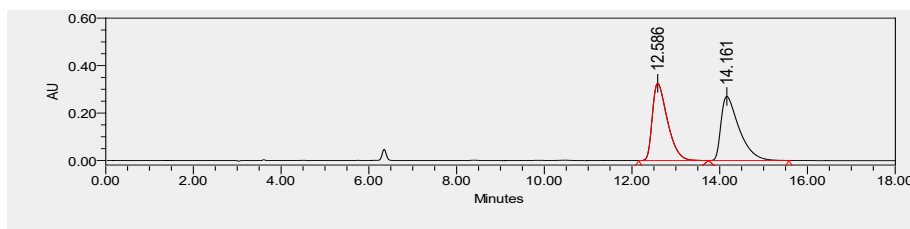

|   | Retention Time | Area    | % Area |
|---|----------------|---------|--------|
| 1 | 12.586         | 7785414 | 50.10  |
| 2 | 14.161         | 7754731 | 49.90  |

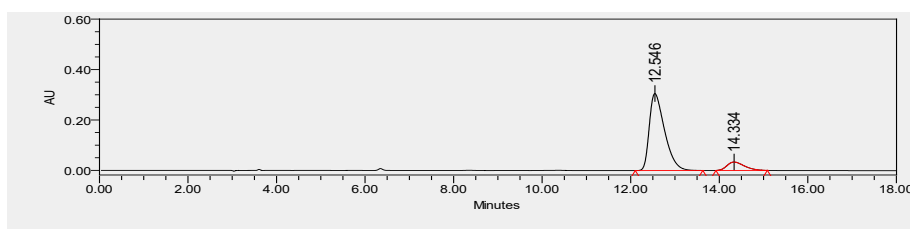

|   | Retention Time | Area    | % Area |
|---|----------------|---------|--------|
| 1 | 12.546         | 7318545 | 88.97  |
| 2 | 14.334         | 907579  | 11.03  |

**(S)-1,1'-(but-1-yne-1,3-diyl)dinaphthalene (C13)**

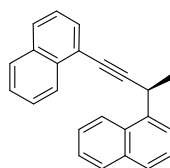

General procedure A for 48 h.

0.2 mmol scale; 59.0 mg, colorless oil, 96% yield, 94:6 *er*,  $[\alpha]_D^{20} = +80.1$  (c 1.18, CH<sub>2</sub>Cl<sub>2</sub>).

**HPLC** Chiralcel OD-H, hexane/isopropanol = 99/1, 1.0 mL/min,  $\lambda = 254$  nm,  $t_1 = 10.70$  min,  $t_2 = 12.41$  min

**<sup>1</sup>H NMR** (400 MHz, CDCl<sub>3</sub>)  $\delta$  8.36 (d,  $J = 8.4$  Hz, 1H), 8.22 (d,  $J = 8.4$  Hz, 1H), 7.92 - 7.86 (m, 2H), 7.81 - 7.45 (m, 3H), 7.68 - 7.66 (m, 1H), 7.58 - 7.44 (m, 5H), 7.39 - 7.36 (m, 1H), 4.88 (q,  $J = 7.2$  Hz, 1H), 1.83 (d,  $J = 7.2$  Hz, 3H).

**<sup>13</sup>C NMR** (101 MHz, CDCl<sub>3</sub>)  $\delta$  138.8, 134.0, 133.5, 133.2, 130.6, 130.2, 129.0, 128.2, 127.5, 126.6, 126.3, 126.2, 126.1, 125.7, 125.5, 125.2, 124.3, 123.2, 121.4, 97.8, 80.8, 29.4, 23.5.

**HR-MS** (ESI) calcd for C<sub>24</sub>H<sub>19</sub><sup>+</sup> ([M+H]<sup>+</sup>): 307.1481, found 304.1485;

**IR** (neat) 3054, 2976, 2930, 1591, 1508, 1394, 861, 797, 773, 736, 568, 452 cm<sup>-1</sup>.

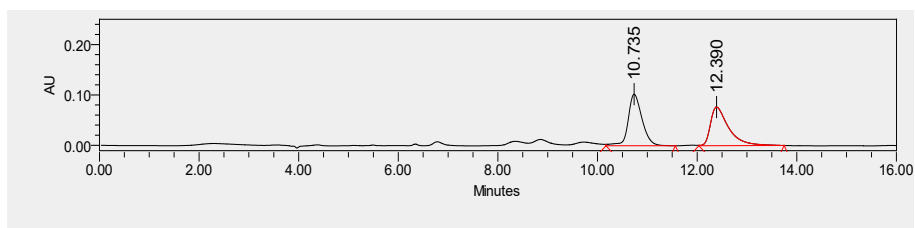

|   | Retention Time | Area    | % Area |
|---|----------------|---------|--------|
| 1 | 10.735         | 1979438 | 50.48  |
| 2 | 12.390         | 1941582 | 49.52  |

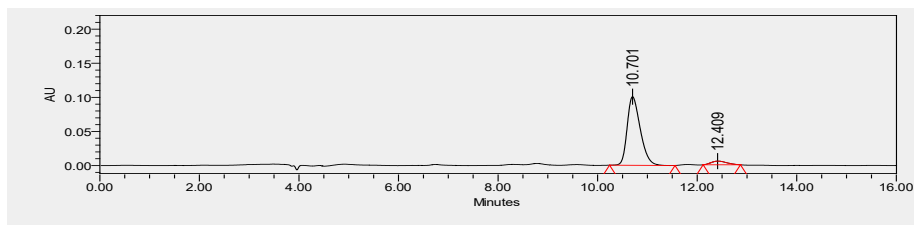

|   | Retention Time | Area    | % Area |
|---|----------------|---------|--------|
| 1 | 10.701         | 1835615 | 93.88  |
| 2 | 12.409         | 119582  | 6.12   |

**(S)-1-(4-(naphthalen-2-yl)but-3-yn-2-yl)naphthalene (C14)**

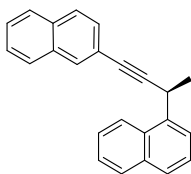

General procedure A for 48 h.

0.2 mmol scale; 58.7 mg, colorless oil, 96% yield, 93:7 *er*,  $[\alpha]_D^{20} = +117.5$  (c 1.17, CH<sub>2</sub>Cl<sub>2</sub>).

**HPLC** Chiralcel OD-H, hexane/isopropanol = 99/1, 1.0 mL/min,  $\lambda = 254$  nm,  $t_1 = 10.70$  min,  $t_2 = 12.41$  min

**<sup>1</sup>H NMR** (400 MHz, CDCl<sub>3</sub>)  $\delta$  8.17 (d,  $J = 8.4$  Hz, 1H), 7.96 - 7.95 (m, 1H), 7.87 - 7.85 (m, 2H), 7.79 - 7.69 (m, 4H), 7.59 - 7.39 (m, 6H), 4.76 (q,  $J = 7.2$  Hz, 1H), 1.76 - 1.74 (m, 3H).

**<sup>13</sup>C NMR** (101 MHz, CDCl<sub>3</sub>)  $\delta$  138.8, 134.0, 133.0, 132.5, 131.2, 130.5, 129.0, 128.7, 127.8, 127.7, 127.6, 127.5, 126.4, 126.3, 126.0, 125.7, 125.5, 124.3, 123.2, 121.0, 93.2, 83.0, 29.1, 23.4.

**HR-MS** (ESI) calcd for C<sub>24</sub>H<sub>19</sub><sup>+</sup> ( $[M+H]^+$ ): 307.1481, found 307.1485;

**IR** (neat) 3054, 2976, 2930, 1596, 1505, 1451, 1395, 1264, 893, 858, 797, 776, 754, 475, 445 cm<sup>-1</sup>.

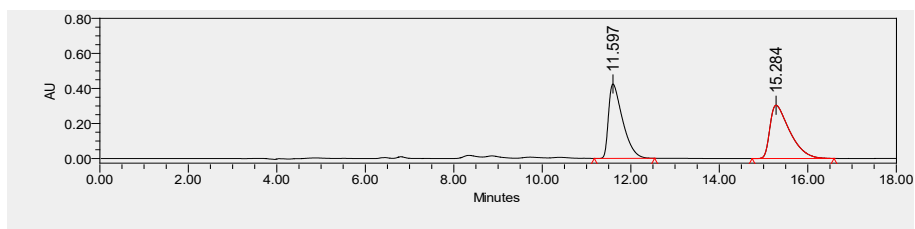

|   | Retention Time | Area    | % Area |
|---|----------------|---------|--------|
| 1 | 11.597         | 9374701 | 49.85  |
| 2 | 15.284         | 9431577 | 50.15  |

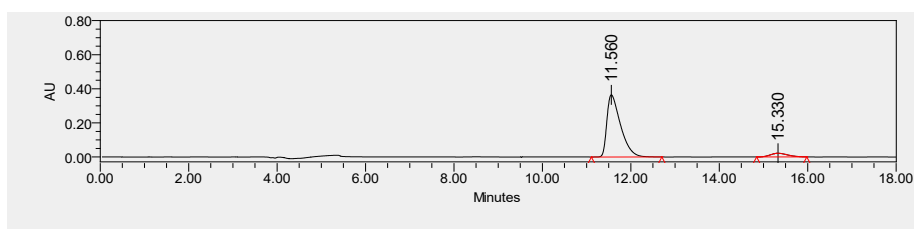

|   | Retention Time | Area    | % Area |
|---|----------------|---------|--------|
| 1 | 11.560         | 7823080 | 93.01  |
| 2 | 15.330         | 588343  | 6.99   |

**(S)-1-(4-([1,1'-biphenyl]-4-yl)but-3-yn-2-yl)naphthalene (C15)**

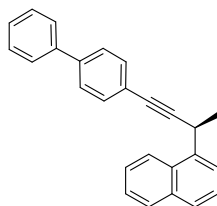

General procedure A for 48 h.

0.2 mmol scale; 53.2 mg, colorless oil, 80% yield, 92:8 *er*,  $[\alpha]_D^{20} = +99.1$  (c 1.06, CH<sub>2</sub>Cl<sub>2</sub>).

**HPLC** Chiralcel OD-H, hexane/isopropanol = 97/3, 1.0 mL/min,  $\lambda = 254$  nm,  $t_1 = 10.70$  min,  $t_2 = 12.41$  min

**<sup>1</sup>H NMR** (400 MHz, CDCl<sub>3</sub>)  $\delta$  8.17 (d,  $J = 8.4$  Hz, 1H), 7.91 - 7.81 (m, 2H), 7.76 (d,  $J = 8.0$  Hz, 1H), 7.60 - 7.53 (m, 3H), 7.52 (s, 4H), 7.50 - 7.46 (m, 2H), 7.43 - 7.40 (m, 2H), 7.36 - 7.30 (m, 1H), 4.75 (q,  $J = 7.2$  Hz, 1H), 1.74 (d,  $J = 7.2$  Hz, 3H).

**<sup>13</sup>C NMR** (101 MHz, CDCl<sub>3</sub>)  $\delta$  140.4, 138.8, 134.0, 132.0, 130.5, 129.0, 128.8, 127.5, 127.0, 126.9, 126.0, 125.7, 125.5, 124.3, 123.2, 122.6, 93.5, 82.5, 29.1, 23.4.

**HR-MS** (ESI) calcd for C<sub>26</sub>H<sub>21</sub><sup>+</sup> ([M+H]<sup>+</sup>): 333.1638, found 333.1642;

**IR** (neat) 3055, 2976, 2929, 1597, 1485, 1396, 1308, 1004, 840, 798, 764, 724, 696, 558, 501 cm<sup>-1</sup>.

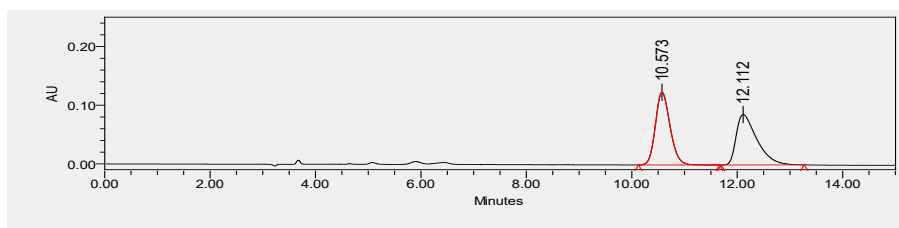

|   | Retention Time | Area    | % Area |
|---|----------------|---------|--------|
| 1 | 10.573         | 2390465 | 50.47  |
| 2 | 12.112         | 2345706 | 49.53  |

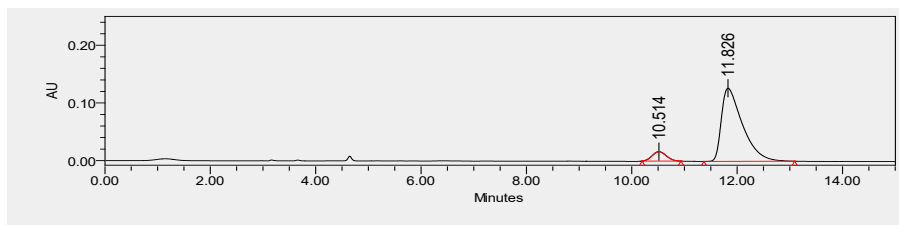

|   | Retention Time | Area    | % Area |
|---|----------------|---------|--------|
| 1 | 10.514         | 306253  | 8.00   |
| 2 | 11.826         | 3520541 | 92.00  |

**(S)-trimethyl(3-(naphthalen-1-yl)but-1-yn-1-yl)silane (C16)**

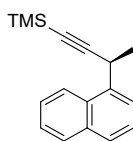

General procedure A for 72 h.

0.2 mmol scale; 43.7 mg, colorless oil, 87% yield, 93:7 *er*,  $[\alpha]_D^{20} = +5.6$  (c 0.87, CH<sub>2</sub>Cl<sub>2</sub>).

**HPLC** Chiralcel OD-H, hexane/isopropanol = 99/1, 1.0 mL/min,  $\lambda = 254$  nm,  $t_1 = 3.86$  min,  $t_2 = 4.08$  min

**<sup>1</sup>H NMR** (400 MHz, CDCl<sub>3</sub>)  $\delta$  8.07 (d,  $J = 8.4$  Hz, 1H), 7.91 - 7.83 (m, 1H), 7.80 - 7.70 (m, 2H), 7.57 - 7.40 (m, 3H), 4.53 (q,  $J = 7.2$  Hz, 1H), 1.62 (d,  $J = 7.2$  Hz, 3H), 0.19 (s, 9H).

**<sup>13</sup>C NMR** (101 MHz, CDCl<sub>3</sub>)  $\delta$  138.6, 133.9, 130.4, 128.9, 127.4, 125.9, 125.6, 125.4, 124.3, 123.1, 109.7, 86.55, 29.5, 23.6, 0.2.

**HR-MS** (ESI) calcd for C<sub>17</sub>H<sub>21</sub>Si<sup>+</sup> ([M+H]<sup>+</sup>): 253.1407, found 253.1411;

**IR** (neat) 2960, 2166, 1263, 1114, 1005, 913, 844, 798, 775, 732, 703 cm<sup>-1</sup>.

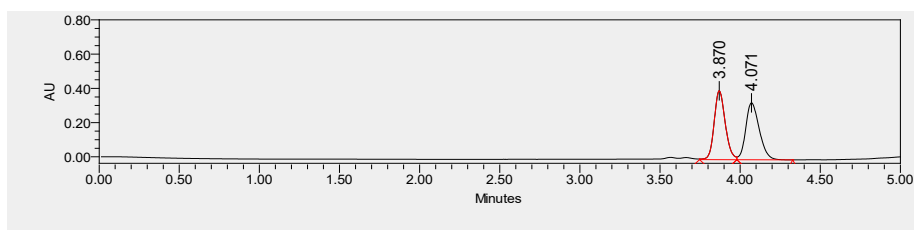

|   | Retention Time | Area    | % Area |
|---|----------------|---------|--------|
| 1 | 3.870          | 1933852 | 49.72  |
| 2 | 4.071          | 1955355 | 50.28  |

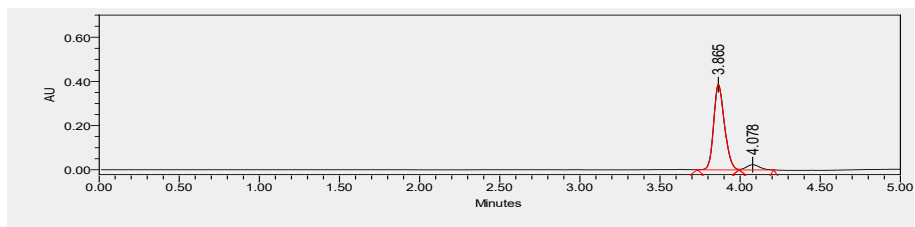

|   | Retention Time | Area    | % Area |
|---|----------------|---------|--------|
| 1 | 3.865          | 1810589 | 93.02  |
| 2 | 4.078          | 135852  | 6.98   |



**(S)-1-(4-cyclopropylbut-3-yn-2-yl)naphthalene (C17)**

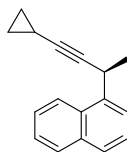

General procedure A for 72 h.

0.2 mmol scale; 31.4 mg, colorless oil, 71% yield, 94:6 er,  $[\alpha]_D^{20} = +14.3$  (c 0.63, CH<sub>2</sub>Cl<sub>2</sub>).

**HPLC** Chiralcel AD-H, hexane/isopropanol = 99.5/0.5, 1.0 mL/min,  $\lambda = 214$  nm,  $t_1 = 6.01$  min,  $t_2 = 9.30$  min

**<sup>1</sup>H NMR** (400 MHz, CDCl<sub>3</sub>)  $\delta$  8.09 (d,  $J = 8.4$  Hz, 1H), 7.86 - 7.84 (m, 1H), 7.74- 7.70 (m, 2H), 7.54 - 7.42 (m, 3H), 4.46 (qd,  $J = 7.2, 1.6$  Hz, 1H), 1.58 (d,  $J = 7.2$  Hz, 3H), 1.33 - 1.25 (m, 1H), 0.78 - 0.71 (m, 2H), 0.71 - 0.64 (m, 2H).

**<sup>13</sup>C NMR** (101 MHz, CDCl<sub>3</sub>)  $\delta$  139.5, 133.9, 130.5, 128.9, 127.2, 125.8, 125.6, 125.4, 124.1, 123.2, 85.5, 78.32, 28.4, 23.7, 8.2, 8.1, -0.3.

**HR-MS** (ESI) calcd for C<sub>17</sub>H<sub>17</sub><sup>+</sup> ( $[M+H]^+$ ): 221.1325, found 221.1326;

**IR** (neat) 3051, 2976, 2931, 1596, 1510, 1450, 1395, 1362, 1264, 1052, 1026, 798, 777, 736, 704 cm<sup>-1</sup>.

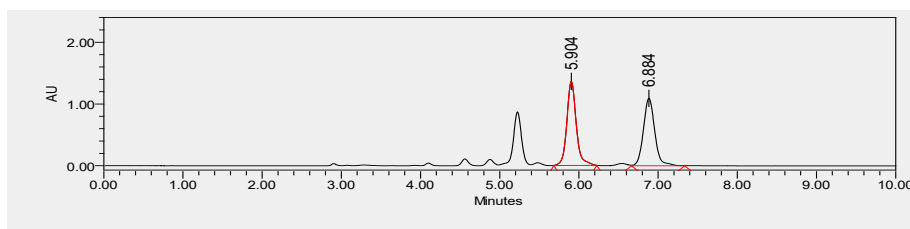

|   | Retention Time | Area     | % Area |
|---|----------------|----------|--------|
| 1 | 5.904          | 11214667 | 50.73  |
| 2 | 6.884          | 10891985 | 49.27  |

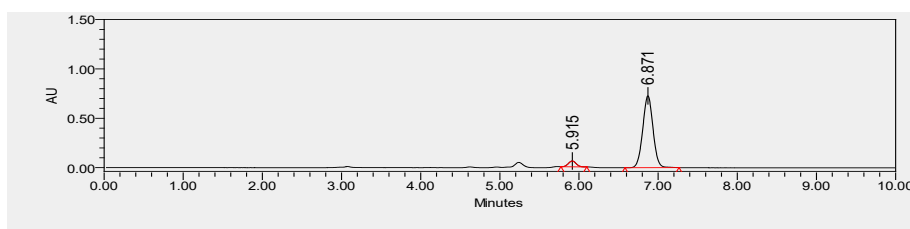

|   | Retention Time | Area    | % Area |
|---|----------------|---------|--------|
| 1 | 5.915          | 403566  | 5.78   |
| 2 | 6.871          | 6578801 | 94.22  |

**(S)-1-(4-cyclopentylbut-3-yn-2-yl)naphthalene (C18)**

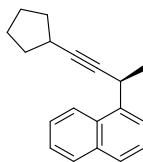

General procedure A for 72 h.

0.2 mmol scale; 33.3 mg, colorless oil, 67% yield, 93:7 *er*,  $[\alpha]_D^{20} = +4.1$  (c 0.67, CH<sub>2</sub>Cl<sub>2</sub>).

**HPLC** Chiralcel OD-H, hexane/isopropanol = 99/1, 1.0 mL/min,  $\lambda = 214$  nm,  $t_1 = 4.98$  min,  $t_2 = 5.71$  min

**<sup>1</sup>H NMR** (400 MHz, CDCl<sub>3</sub>)  $\delta$  8.11 (d,  $J = 8.4$  Hz, 1H), 7.86 - 7.84 (m, 1H), 7.76 - 7.72 (m, 2H), 7.53 - 7.42 (m, 3H), 4.49 (qd,  $J = 7.2, 2.0$  Hz, 1H), 2.67 (pd,  $J = 7.2, 2.0$  Hz, 1H), 2.00 - 1.85 (m, 2H), 1.75 - 1.69 (m, 2H), 1.67 - 1.47 (m, 7H).

**<sup>13</sup>C NMR** (101 MHz, CDCl<sub>3</sub>)  $\delta$  139.8, 133.9, 130.5, 128.9, 127.2, 125.8, 125.6, 125.3, 124.1, 123.2, 87.0, 82.6, 34.1, 30.4, 28.6, 24.9, 23.9.

**HR-MS** (ESI) calcd for C<sub>19</sub>H<sub>21</sub><sup>+</sup> ( $[M+H]^+$ ): 249.1638, found 249.1638;

**IR** (neat) 2962, 1263, 895, 731, 703 cm<sup>-1</sup>.

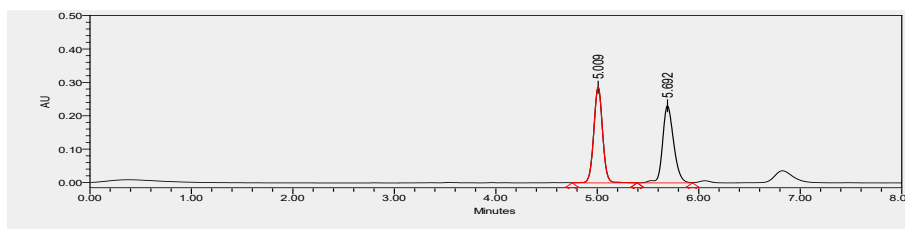

|   | Retention Time | Area    | % Area |
|---|----------------|---------|--------|
| 1 | 5.009          | 1733216 | 49.77  |
| 2 | 5.692          | 1749523 | 50.23  |

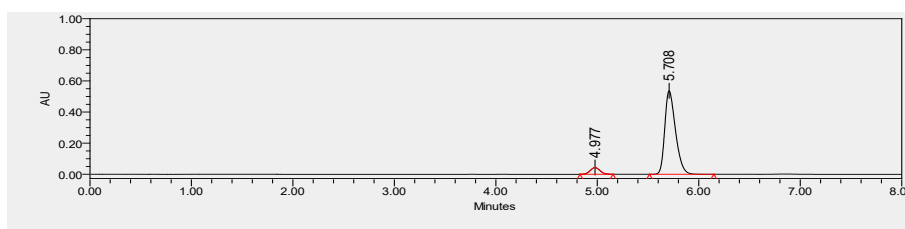

|   | Retention Time | Area    | % Area |
|---|----------------|---------|--------|
| 1 | 4.977          | 286553  | 6.80   |
| 2 | 5.708          | 3930035 | 93.20  |

**(S)-1-(5-phenylpent-3-yn-2-yl)naphthalene (C19)**

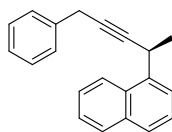

General procedure B for 72 h.

0.2 mmol scale; 46.0 mg, colorless oil, 85% yield, 93:7 *er*,  $[\alpha]_D^{20} = +16.4$  (c 0.92, CH<sub>2</sub>Cl<sub>2</sub>).

**HPLC** Chiralcel OD-H, hexane/isopropanol = 99/1, 1.0 mL/min,  $\lambda = 214$  nm,  $t_1 = 9.96$  min,  $t_2 = 18.40$  min

**<sup>1</sup>H NMR** (400 MHz, CDCl<sub>3</sub>)  $\delta$  8.13 (d,  $J = 8.4$  Hz, 1H), 7.89 - 7.83 (m, 1H), 7.78 - 7.73 (m, 2H), 7.54 - 7.44 (m, 3H), 7.38 - 7.36 (m, 2H), 7.32 - 7.28 (m, 2H), 7.25 - 7.19 (m, 1H), 4.57 (qt,  $J = 7.2, 2.0$  Hz, 1H), 3.67 (d,  $J = 2.4$  Hz, 2H), 1.65 (d,  $J = 7.2$  Hz, 3H).

**<sup>13</sup>C NMR** (101 MHz, CDCl<sub>3</sub>)  $\delta$  139.3, 137.3, 133.9, 130.5, 128.9, 128.4, 127.9, 127.3, 126.4, 125.9, 125.6, 125.4, 124.1, 123.2, 85.4, 79.9, 28.5, 25.2, 23.5.

**HR-MS** (ESI) calcd for C<sub>21</sub>H<sub>19</sub><sup>+</sup> ( $[M+H]^+$ ): 271.1481, found 271.1489;

**IR** (neat) 3057, 2975, 1598, 1494, 1451, 1263, 1029, 798, 777, 729, 700 cm<sup>-1</sup>.

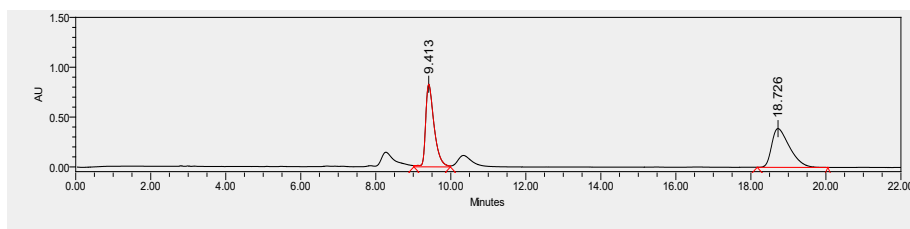

|   | Retention Time | Area     | % Area |
|---|----------------|----------|--------|
| 1 | 9.413          | 13024397 | 50.38  |
| 2 | 18.726         | 12830277 | 49.62  |

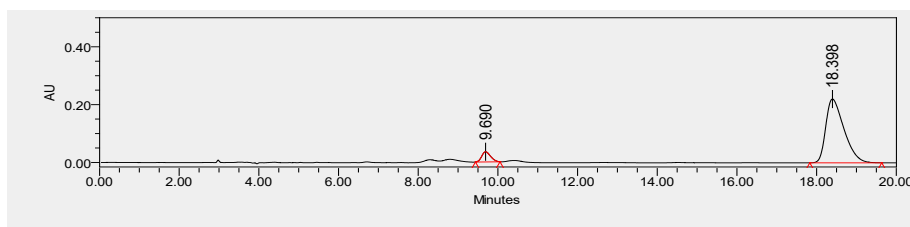

|   | Retention Time | Area    | % Area |
|---|----------------|---------|--------|
| 1 | 9.690          | 540199  | 7.16   |
| 2 | 18.398         | 7001993 | 92.84  |

**(S)-1-(6-phenylhex-3-yn-2-yl)naphthalene (C20)**

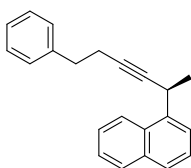

General procedure B for 72 h.

0.2 mmol scale; 46.5 mg, colorless oil, 82% yield, 92:8 *er*,  $[\alpha]_D^{20} = +14.6$  (c 0.93, CH<sub>2</sub>Cl<sub>2</sub>).

**HPLC** Chiralcel OD-H, hexane/isopropanol = 99/1, 1.0 mL/min,  $\lambda = 214$  nm,  $t_1 = 10.64$  min,  $t_2 = 20.36$  min

**<sup>1</sup>H NMR** (400 MHz, CDCl<sub>3</sub>)  $\delta$  8.07 (d,  $J = 8.4$  Hz, 1H), 7.87 - 7.82 (m, 1H), 7.72 (d,  $J = 8.0$  Hz, 1H), 7.63 (d,  $J = 6.8$  Hz, 1H), 7.52 - 7.39 (m, 3H), 7.31 - 7.24 (m, 2H), 7.24 - 7.17 (m, 3H), 4.52 - 4.42 (m, 1H), 2.84 (t,  $J = 7.6$  Hz, 2H), 2.53 (td,  $J = 7.6, 2.4$  Hz, 2H), 1.58 (d,  $J = 7.2$  Hz, 3H).

**<sup>13</sup>C NMR** (101 MHz, CDCl<sub>3</sub>)  $\delta$  140.9, 139.3, 133.9, 130.5, 128.9, 128.6, 128.3, 127.2, 126.1, 125.8, 125.6, 125.4, 124.1, 123.2, 83.9, 81.8, 35.4, 28.4, 23.6, 21.1.

**HR-MS** (ESI) calcd for C<sub>22</sub>H<sub>21</sub><sup>+</sup> ([M+H]<sup>+</sup>): 285.1638, found 285.1644;

**IR** (neat) 3059, 2974, 2928, 1598, 1495, 1451, 1394, 1029, 798, 777, 745, 698, 577, 499 cm<sup>-1</sup>.

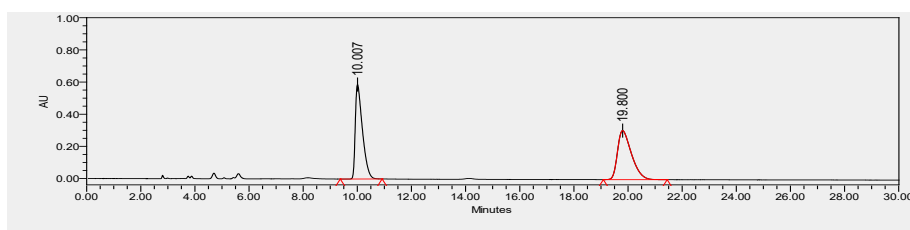

|   | Retention Time | Area     | % Area |
|---|----------------|----------|--------|
| 1 | 10.007         | 10780042 | 49.67  |
| 2 | 19.800         | 10922504 | 50.33  |

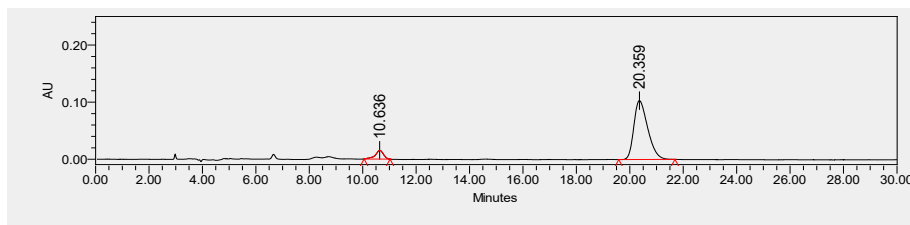

|   | Retention Time | Area    | % Area |
|---|----------------|---------|--------|
| 1 | 10.636         | 324528  | 8.02   |
| 2 | 20.359         | 3723608 | 91.98  |

**(S)-1-(5,5-diethoxypent-3-yn-2-yl)naphthalene (C21)**

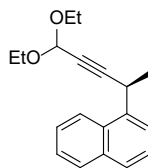

General procedure B for 72 h.

0.2 mmol scale; 53.0 mg, colorless oil, 94% yield, 94:6 er,  $[\alpha]_D^{20} = +16.2$  (c 1.06, CH<sub>2</sub>Cl<sub>2</sub>).

**HPLC** Chiralcel OD-H, hexane/isopropanol = 99/1, 1.0 mL/min,  $\lambda = 280$  nm,  $t_1 = 7.86$  min,  $t_2 = 9.33$  min

**<sup>1</sup>H NMR** (400 MHz, CDCl<sub>3</sub>)  $\delta$  8.07 (d,  $J = 8.4$  Hz, 1H), 7.89 - 7.83 (m, 1H), 7.76 - 7.71 (m, 2H), 7.54 - 7.43 (m, 3H), 5.35 (s, 1H), 4.59 (q,  $J = 6.8$  Hz, 1H), 3.76 (dp,  $J = 9.6, 7.2$  Hz, 2H), 3.59 (dp,  $J = 9.6, 7.2$  Hz, 2H), 1.65 (d,  $J = 7.2$  Hz, 3H), 1.23 (q,  $J = 7.2$  Hz, 6H).

**<sup>13</sup>C NMR** (101 MHz, CDCl<sub>3</sub>)  $\delta$  138.0, 133.9, 130.4, 128.9, 127.5, 126.0, 125.6, 125.5, 124.2, 123.0, 91.5, 88.7, 77.8, 60.7, 60.6, 28.3, 22.9, 15.1, 15.0.

**HR-MS** (ESI) calcd for C<sub>19</sub>H<sub>23</sub>O<sub>2</sub><sup>+</sup> ([M+H]<sup>+</sup>): 283.1693, found 283.1690;

**IR** (neat) 2975, 2930, 2881, 2246, 1597, 1511, 1448, 1394, 1356, 1329, 1149, 1097, 1051, 1007, 799, 777 cm<sup>-1</sup>.

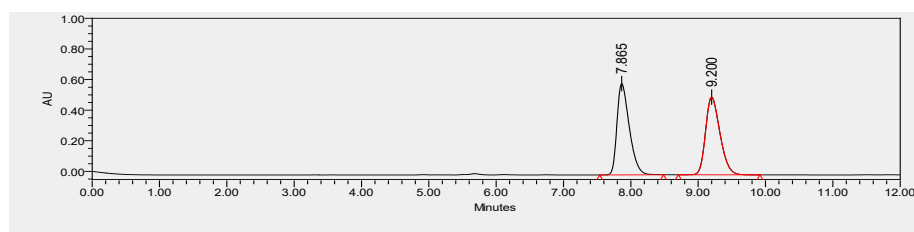

|   | Retention Time | Area    | % Area |
|---|----------------|---------|--------|
| 1 | 7.865          | 7587706 | 50.13  |
| 2 | 9.200          | 7547750 | 49.87  |

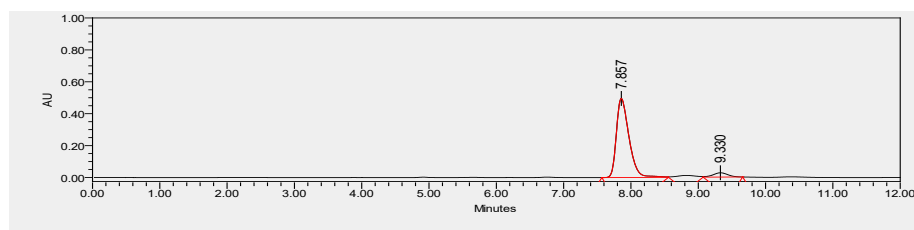

|   | Retention Time | Area    | % Area |
|---|----------------|---------|--------|
| 1 | 7.857          | 6448420 | 93.99  |
| 2 | 9.330          | 412629  | 6.01   |

**(S)-1-(5-phenoxy-3-yn-2-yl)naphthalene (C22)**

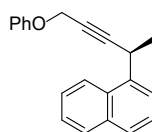

General procedure B for 48 h.

0.2 mmol scale; 38.7 mg, colorless oil, 67% yield, 94:6 *er*,  $[\alpha]_D^{20} = +15.2$  (c 0.77, CH<sub>2</sub>Cl<sub>2</sub>).

**HPLC** Chiralcel OD-H, hexane/isopropanol = 95/5, 1.0 mL/min,  $\lambda = 220$  nm,  $t_1 = 12.32$  min,  $t_2 = 17.61$  min

**<sup>1</sup>H NMR** (400 MHz, CDCl<sub>3</sub>)  $\delta$  8.08 - 8.00 (m, 1H), 7.86 - 7.84 (m, 1H), 7.73 (d,  $J = 8.4$  Hz, 1H), 7.64 (d,  $J = 6.8$  Hz, 1H), 7.52 - 7.38 (m, 3H), 7.31 - 7.26 (m, 2H), 7.00 - 6.96 (m, 3H), 4.74 (d,  $J = 2.0$  Hz, 2H), 4.54 (q,  $J = 7.2$  Hz, 1H), 1.62 (d,  $J = 7.2$  Hz, 3H).

**<sup>13</sup>C NMR** (101 MHz, CDCl<sub>3</sub>)  $\delta$  157.7, 138.2, 133.9, 130.4, 129.4, 128.9, 127.5, 126.0, 125.6, 125.4, 124.2, 123.0, 121.2, 115.0, 90.7, 56.4, 28.4, 22.9.

**HR-MS** (ESI) calcd for C<sub>21</sub>H<sub>18</sub>ONa<sup>+</sup> ( $[M+Na]^+$ ): 309.1250, found 309.1246;

**IR** (neat) 3059, 2977, 2931, 2870, 2246, 1595, 1493, 1452, 1372, 1215, 1174, 1030, 1009, 799, 777, 753, 690, 506, 432 cm<sup>-1</sup>.

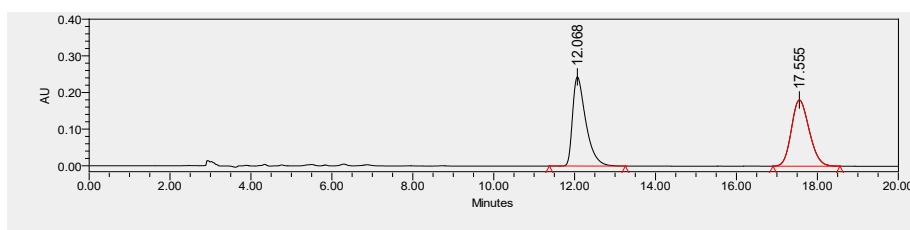

|   | Retention Time | Area    | % Area |
|---|----------------|---------|--------|
| 1 | 12.068         | 5528583 | 50.02  |
| 2 | 17.555         | 5523197 | 49.98  |

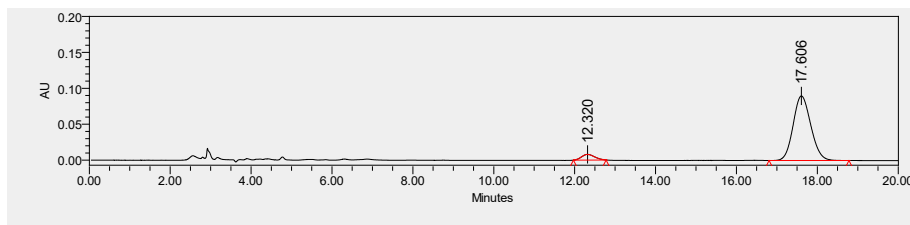

|   | Retention Time | Area    | % Area |
|---|----------------|---------|--------|
| 1 | 12.320         | 177576  | 6.12   |
| 2 | 17.606         | 2725414 | 93.88  |

**(3a*S*,4*R*,5a*S*,8a*S*,8b*S*)-2,2,7,7-tetramethyl-4-(((*S*)-4-(naphthalen-1-yl)pent-2-yn-1-yl)oxy)methyl)hexahydrobenzo[1,2-*d*:3,4-*d'*]bis[1,3]dioxole (C23)**

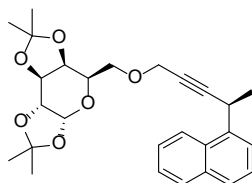

General procedure B for 72 h.

0.1 mmol scale; 29.9 mg, colorless oil, 66% yield, 95:5 *dr*,  $[\alpha]_{\text{D}}^{20} = -40.8$  (c 0.60, CH<sub>2</sub>Cl<sub>2</sub>).

**HPLC** Chiralcel OD-H, hexane/isopropanol = 80/20, 1.0 mL/min,  $\lambda = 220$  nm,  $t_1 = 9.33$  min,  $t_2 = 11.17$  min

**<sup>1</sup>H NMR** (400 MHz, CDCl<sub>3</sub>)  $\delta$  8.10 (d,  $J = 8.4$  Hz, 1H), 7.87 (d,  $J = 8.0$  Hz, 1H), 7.74 (t,  $J = 8.0$  Hz, 2H), 7.57 - 7.42 (m, 3H), 5.55 (d,  $J = 5.2$  Hz, 1H), 4.63 - 4.52 (m, 2H), 4.36 - 4.20 (m, 4H), 4.04 - 3.97 (m, 1H), 3.80 - (dd,  $J = 10.0, 5.2$  Hz, 1H), 3.69 (dd,  $J = 10.0, 7.2$  Hz, 1H), 1.64 (d,  $J = 7.2$  Hz, 3H), 1.53 (s, 3H), 1.44 (s, 3H), 1.33 (d,  $J = 4.4$  Hz, 6H).

**<sup>13</sup>C NMR** (101 MHz, CDCl<sub>3</sub>)  $\delta$  138.5, 133.9, 130.4, 128.9, 127.4, 126.0, 125.6, 125.4, 124.2, 123., 109.2, 108.6, 96.3, 89.7, 78.0, 71.1, 70.6, 70.4, 68.3, 66.6, 59.0, 28.4, 26.0, 25.9, 24.9, 24.4, 23.1.

**HR-MS** (ESI) calcd for C<sub>27</sub>H<sub>32</sub>O<sub>6</sub>Na<sup>+</sup> ([M+Na]<sup>+</sup>): 475.2091, found 475.2086;

**IR** (neat) 2983, 2932, 1511, 1454, 1377, 1254, 1211, 1171, 1102, 1070, 1004, 891, 862, 801, 777, 511 cm<sup>-1</sup>.

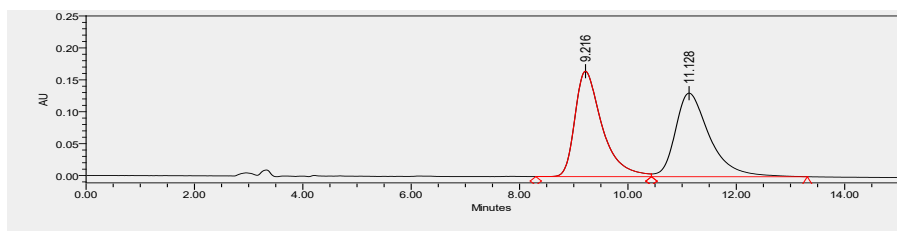

|   | Retention Time | Area    | % Area |
|---|----------------|---------|--------|
| 1 | 9.216          | 5776675 | 50.12  |
| 2 | 11.128         | 5749801 | 49.88  |

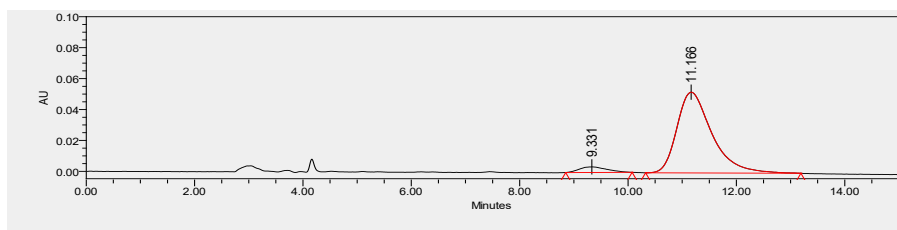

|   | Retention Time | Area    | % Area |
|---|----------------|---------|--------|
| 1 | 9.331          | 128837  | 5.21   |
| 2 | 11.166         | 2342912 | 94.79  |

**(8R,9S,13S,14S,17S)-3-(cyclopentyloxy)-13-methyl-17-((S)-3-(naphthalen-1-yl)but-1-yn-1-yl)-7,8,9,11,12,13,14,15,16,17-decahydro-6H-cyclopenta[a]phenanthren-17-ol (C24)**

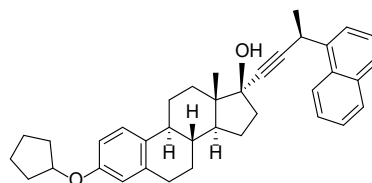

General procedure B for 72 h.

0.1 mmol scale; 36.9 mg, colorless oil, 71% yield, 91:9 *dr*;  $[\alpha]_D^{20} = +4.9$  (c 0.74, CH<sub>2</sub>Cl<sub>2</sub>).

**HPLC** Chiralcel OD-H, hexane/isopropanol = 90/10, 1.0 mL/min,  $\lambda = 220$  nm,  $t_1 = 12.32$  min,  $t_2 = 17.61$  min

**<sup>1</sup>H NMR** (400 MHz, CDCl<sub>3</sub>)  $\delta$  8.12 (d,  $J = 8.4$  Hz, 1H), 7.85 (d,  $J = 8.4$  Hz, 1H), 7.77 - 7.69 (m, 2H), 7.57 - 7.40 (m, 3H), 7.16 (d,  $J = 8.4$  Hz, 1H), 6.67 (dd,  $J = 8.4, 2.4$  Hz, 1H), 6.60 (d,  $J = 2.4$  Hz, 1H), 4.71 (dt,  $J = 5.6, 2.8$  Hz, 1H), 4.58 (q,  $J = 7.2$  Hz, 1H), 3.74 (brs, 1H), 2.83 - 2.81 (m, 2H), 2.36 - 2.26 (m, 2H), 2.12 - 1.99 (m, 2H), 1.90 - 1.82 (m, 6H), 1.81 - 1.71 (m, 4H), 1.70 - 1.64 (m, 5H), 1.61 - 1.57 (m,  $J = 7.1, 6.7, 3.6$  Hz, 2H), 1.50 - 1.28 (m, 4H), 0.87 (s, 3H).

**<sup>13</sup>C NMR** (101 MHz, CDCl<sub>3</sub>)  $\delta$  155.8, 138.9, 137.8, 133.9, 132.1, 130.4, 128.9, 127.4, 126.2, 125.9, 125.5, 125.4, 124.1, 123.2, 115.5, 112.8, 89.0, 86.0, 80.0, 78.9, 49.5, 47.4, 43.6, 39.4, 39.1, 32.8, 29.8, 28.6, 27.3, 26.4, 24.0, 23.4, 22.8, 12.8.

**HR-MS** (ESI) calcd for C<sub>37</sub>H<sub>42</sub>O<sub>2</sub>Na<sup>+</sup> ([M+Na]<sup>+</sup>): 541.3077, found 541.3083;

**IR** (neat) 3446, 2932, 2869, 1609, 1497, 1450, 1280, 1251, 1166, 1047, 1001, 867, 798, 777, 452 cm<sup>-1</sup>.

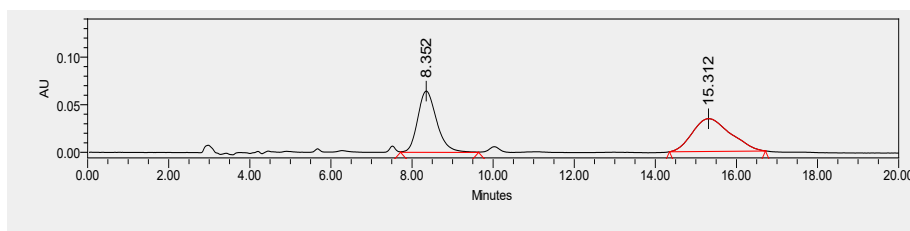

|   | Retention Time | Area    | % Area |
|---|----------------|---------|--------|
| 1 | 8.352          | 2095898 | 48.37  |
| 2 | 15.312         | 2237060 | 51.63  |

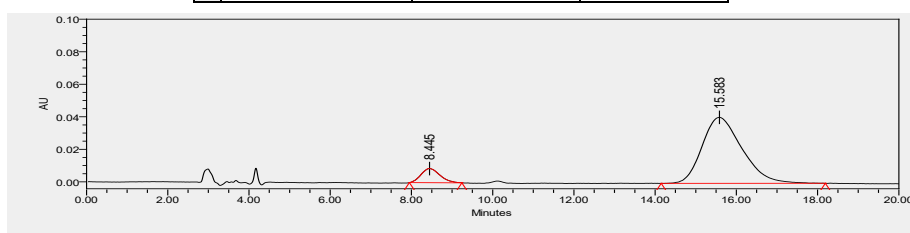

|   | Retention Time | Area    | % Area |
|---|----------------|---------|--------|
| 1 | 8.445          | 279036  | 9.15   |
| 2 | 15.583         | 2769399 | 90.85  |



**(S)-but-1-yne-1,3-diylidibenzene (C25)**

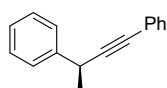

General procedure A for 24 h.

0.2 mmol scale; 35.5 mg, colorless oil, 86% yield, 82.5:17.5 er,  $[\alpha]_D^{20} = +25.5$  (c 0.71, CH<sub>2</sub>Cl<sub>2</sub>).

**HPLC** Chiralcel OD-H, hexane/isopropanol = 99/1, 1.0 mL/min,  $\lambda = 254$  nm,  $t_1 = 5.46$  min,  $t_2 = 6.19$  min

**<sup>1</sup>H NMR** (600 MHz, CDCl<sub>3</sub>)  $\delta$  7.46 - 7.43 (m, 4H), 7.34 (t,  $J = 7.2$  Hz, 2H), 7.30 - 7.21 (m, 4H), 3.98 (q,  $J = 7.2$  Hz, 1H), 1.58 (d,  $J = 7.2$  Hz, 3H).

**<sup>13</sup>C NMR** (151 MHz, CDCl<sub>3</sub>)  $\delta$  143.3, 131.6, 128.5, 128.2, 127.7, 126.9, 126.6, 123.7, 92.6, 82.4, 32.4, 24.5.

**HR-MS** (ESI) calcd for C<sub>16</sub>H<sub>15</sub><sup>+</sup> ( $[M+H]^+$ ): 207.1168, found 207.1166;

**IR** (neat) 3059, 3027, 2975, 2929, 2870, 1598, 1489, 1448, 1299, 1071, 1028, 911, 755, 694, 556, 527 cm<sup>-1</sup>.

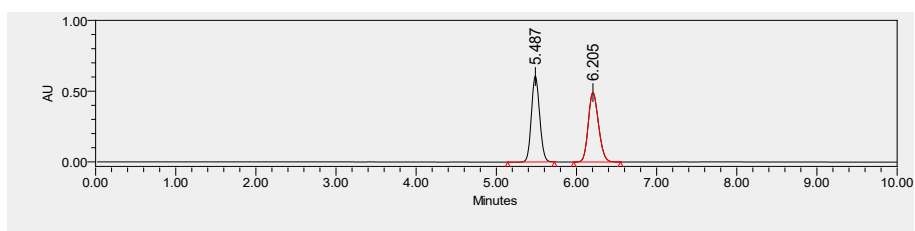

|   | Retention Time | Area    | % Area |
|---|----------------|---------|--------|
| 1 | 5.487          | 4342230 | 49.79  |
| 2 | 6.205          | 4378735 | 50.21  |

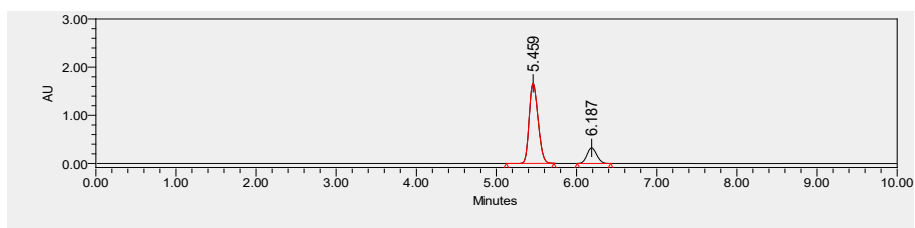

|   | Retention Time | Area     | % Area |
|---|----------------|----------|--------|
| 1 | 5.459          | 12792927 | 82.42  |
| 2 | 6.187          | 2728630  | 17.58  |

**(S)-pent-1-yne-1,3-diylidbenzene (C26)**

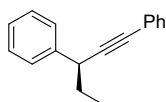

General procedure A for 48 h.

0.2 mmol scale; 39.1 mg, colorless oil, 89% yield, 85:15 *er*;  $[\alpha]_D^{20} = +15.9$  (c 0.78, CH<sub>2</sub>Cl<sub>2</sub>).

**HPLC** Chiralcel OD-H, hexane/isopropanol = 99.5/0.5, 1.0 mL/min,  $\lambda = 254$  nm,  $t_1 = 4.63$  min,  $t_2 = 5.26$  min

**<sup>1</sup>H NMR** (400 MHz, CDCl<sub>3</sub>)  $\delta$  7.49 - 7.38 (m, 4H), 7.35 - 7.31 (m, 2H), 7.31 - 7.19 (m, 4H), 3.83 - 3.75 (m, 1H), 1.94 - 1.78 (m, 2H), 1.05 (t,  $J = 7.2$  Hz, 3H).

**<sup>13</sup>C NMR** (101 MHz, CDCl<sub>3</sub>)  $\delta$  142.0, 131.6, 128.4, 128.2, 127.7, 127.5, 126.6, 123.8, 91.4, 83.3, 39.9, 31.7, 11.8.

**HR-MS** (ESI) calcd for C<sub>17</sub>H<sub>17</sub><sup>+</sup> ([M+H]<sup>+</sup>): 221.1325, found 221.1321;

**IR** (neat) 3060, 3028, 2965, 2930, 2871, 1599, 1490, 1450, 1378, 1344, 1070, 1027, 913, 754, 694, 543 cm<sup>-1</sup>.

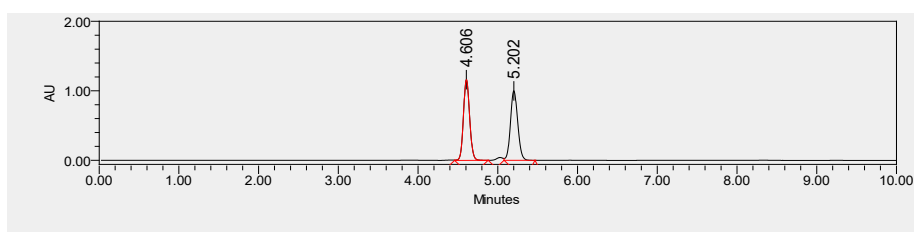

|   | Retention Time | Area    | % Area |
|---|----------------|---------|--------|
| 1 | 4.606          | 6292936 | 49.78  |
| 2 | 5.202          | 6348174 | 50.22  |

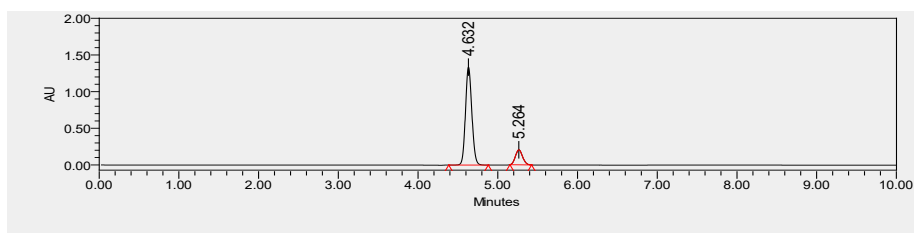

|   | Retention Time | Area    | % Area |
|---|----------------|---------|--------|
| 1 | 4.632          | 7422572 | 85.26  |
| 2 | 5.264          | 1282884 | 14.74  |

**(S)-hex-1-yne-1,3-diylidibenzene (C27)**

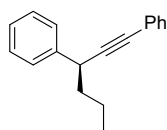

General procedure A for 48 h.

0.2 mmol scale; 43.2 mg, colorless oil, 92% yield, 82:18 *er*;  $[\alpha]_D^{20} = +13.0$  (c 0.86, CH<sub>2</sub>Cl<sub>2</sub>).

**HPLC** Chiralcel OD-H, hexane/isopropanol = 99.5/0.5, 1.0 mL/min,  $\lambda = 254$  nm,  $t_1 = 4.34$  min,  $t_2 = 4.99$  min

**<sup>1</sup>H NMR** (400 MHz, CDCl<sub>3</sub>)  $\delta$  7.45 - 7.40 (m, 4H), 7.35 - 7.31 (m, 2H), 7.30 - 7.20 (m, 4H), 3.84 (dd,  $J = 8.0, 6.0$  Hz, 1H), 1.84 - 1.76 (m, 2H), 1.63 - 1.44 (m, 2H), 0.95 (t,  $J = 7.2$  Hz, 3H).

**<sup>13</sup>C NMR** (101 MHz, CDCl<sub>3</sub>)  $\delta$  142.3, 131.6, 128.4, 128.2, 127.7, 127.4, 126.6, 123.8, 91.6, 83.1, 40.8, 38.2, 20.6, 13.8.

**HR-MS** (ESI) calcd for C<sub>18</sub>H<sub>19</sub><sup>+</sup> ( $[M+H]^+$ ): 235.1481, found 235.1477;

**IR** (neat) 2958, 2931, 2869, 1599, 1490, 1453, 1342, 1070, 1028, 754, 694, 539 cm<sup>-1</sup>.

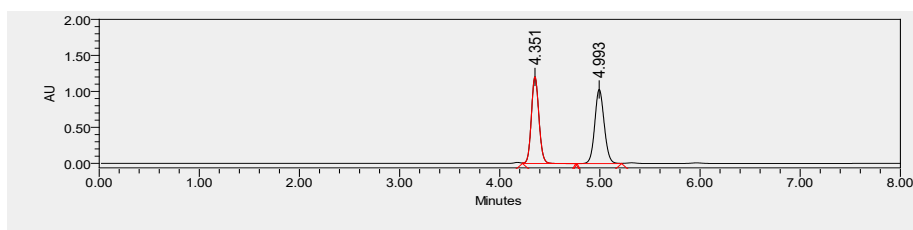

|   | Retention Time | Area    | % Area |
|---|----------------|---------|--------|
| 1 | 4.351          | 6317732 | 48.41  |
| 2 | 4.993          | 6733481 | 51.59  |

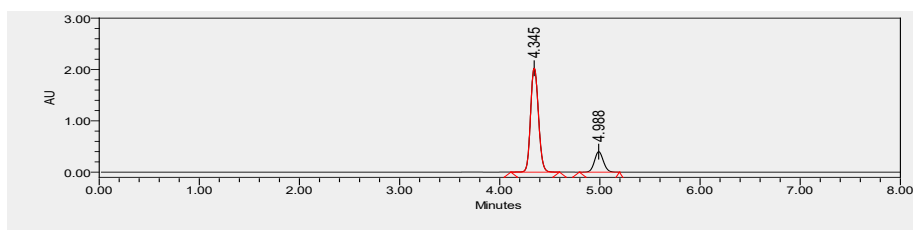

|   | Retention Time | Area     | % Area |
|---|----------------|----------|--------|
| 1 | 4.345          | 11136935 | 81.97  |
| 2 | 4.988          | 2449216  | 18.03  |

**(S)-(4-methylpent-1-yne-1,3-diyl)dibenzene (C28)**

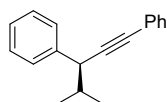

General procedure A for 48 h.

0.2 mmol scale; 27.0 mg, colorless oil, 58% yield, 90:10 *er*;  $[\alpha]_D^{20} = +28.3$  (c 0.54, CH<sub>2</sub>Cl<sub>2</sub>).

**HPLC** Chiralcel OD-H, hexane/isopropanol = 100/0, 1.0 mL/min,  $\lambda = 254$  nm,  $t_1 = 8.84$  min,  $t_2 = 10.55$  min

**<sup>1</sup>H NMR** (400 MHz, CDCl<sub>3</sub>)  $\delta$  7.48 - 7.43 (m, 2H), 7.42 - 7.36 (m, 2H), 7.35 - 7.21 (m, 6H), 3.73 (d,  $J = 6.0$  Hz, 1H), 2.05 (dq,  $J = 13.2, 6.4$  Hz, 1H), 1.04 (d,  $J = 6.8$  Hz, 3H), 0.99 (d,  $J = 6.8$  Hz, 3H).

**<sup>13</sup>C NMR** (101 MHz, CDCl<sub>3</sub>)  $\delta$  141.0, 131.6, 128.2, 128.2, 127.7, 126.6, 123.9, 90.2, 84.2, 45.7, 35.2, 21.3, 18.7.

**HR-MS** (ESI) calcd for C<sub>18</sub>H<sub>19</sub><sup>+</sup> ( $[M+H]^+$ ): 235.1481, found 235.1471;

**IR** (neat) 3028, 2960, 2927, 2869, 2361, 1599, 1490, 1450, 1384, 1348, 1273, 1069, 1029, 912, 754, 694, 542 cm<sup>-1</sup>.

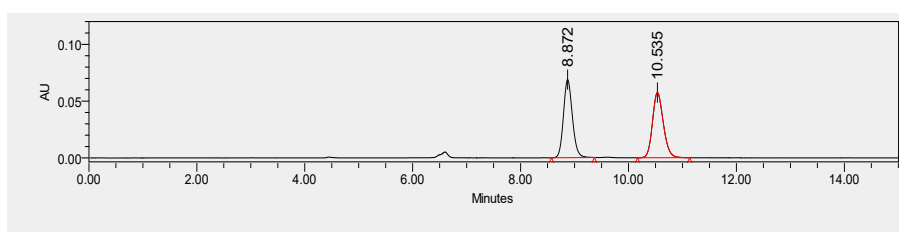

|   | Retention Time | Area   | % Area |
|---|----------------|--------|--------|
| 1 | 8.872          | 788779 | 49.59  |
| 2 | 10.535         | 801851 | 50.41  |

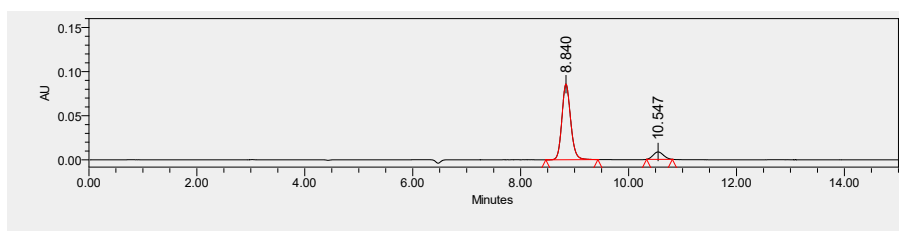

|   | Retention Time | Area   | % Area |
|---|----------------|--------|--------|
| 1 | 8.840          | 971793 | 89.86  |
| 2 | 10.547         | 109710 | 10.14  |

**(S)-1-methyl-2-(4-phenylbut-3-yn-2-yl)benzene (C29)**

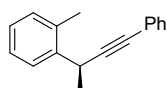

General procedure A for 48 h.

0.2 mmol scale; 38.2 mg, colorless oil, 87% yield, 93:7 *er*,  $[\alpha]_D^{20} = +36.1$  (c 0.76, CH<sub>2</sub>Cl<sub>2</sub>).

**HPLC** Chiralcel OD-H, hexane/isopropanol = 99.5/0.5, 1.0 mL/min,  $\lambda = 254$  nm,  $t_1 = 5.04$  min,  $t_2 = 5.66$  min

**<sup>1</sup>H NMR** (400 MHz, CDCl<sub>3</sub>)  $\delta$  7.60 (d,  $J = 7.5$  Hz, 1H), 7.45 - 7.39 (m, 2H), 7.30 - 7.24 (m, 3H), 7.24 - 7.19 (m, 1H), 7.18 - 7.14 (m, 2H), 4.14 (q,  $J = 7.2$  Hz, 1H), 2.40 (s, 3H), 1.54 (d,  $J = 7.2$  Hz, 3H).

**<sup>13</sup>C NMR** (101 MHz, CDCl<sub>3</sub>)  $\delta$  141.3, 134.7, 131.6, 130.4, 128.2, 127.7, 126.8, 126.6, 126.4, 123.8, 92.9, 81.7, 29.1, 22.8, 19.1.

**HR-MS** (ESI) calcd for C<sub>17</sub>H<sub>17</sub><sup>+</sup> ([M+H]<sup>+</sup>): 221.1325, found 221.1322;

**IR** (neat) 3021, 2974, 2930, 1599, 1488, 1458, 1374, 1327, 1290, 1073, 912, 756, 728, 691, 563, 465 cm<sup>-1</sup>.

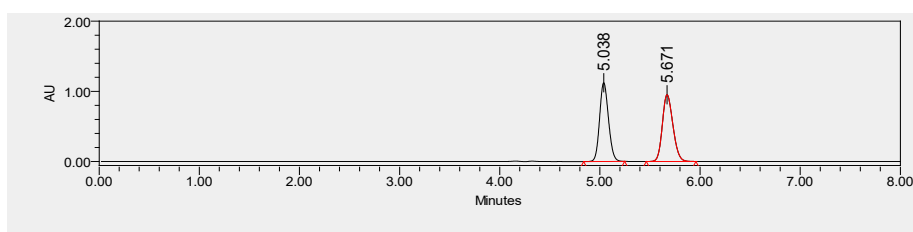

|   | Retention Time | Area    | % Area |
|---|----------------|---------|--------|
| 1 | 5.038          | 6908571 | 49.72  |
| 2 | 5.671          | 6985366 | 50.28  |

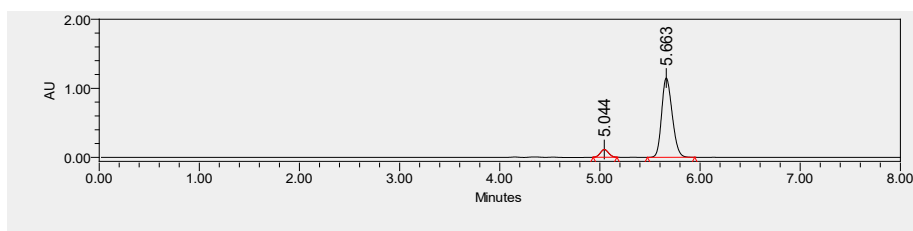

|   | Retention Time | Area    | % Area |
|---|----------------|---------|--------|
| 1 | 5.044          | 642035  | 7.09   |
| 2 | 5.663          | 8409506 | 92.91  |

**(S)-1-methoxy-2-(4-phenylbut-3-yn-2-yl)benzene (C30)**

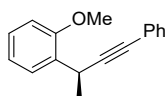

General procedure A for 48 h.

0.2 mmol scale; 28.8 mg, colorless oil, 61% yield, 95:5 *er*,  $[\alpha]_D^{20} = +53.5$  (c 0.58, CH<sub>2</sub>Cl<sub>2</sub>).

**HPLC** Chiralcel OD-H, hexane/isopropanol = 100/0, 1.0 mL/min,  $\lambda = 254$  nm,  $t_1 = 16.25$  min,  $t_2 = 20.34$  min

**<sup>1</sup>H NMR** (400 MHz, CDCl<sub>3</sub>)  $\delta$  7.66 - 7.64 (m, 1H), 7.48 - 7.40 (m, 2H), 7.32 - 7.19 (m, 4H), 7.00 - 6.96 (m, 1H), 6.91 - 6.82 (m, 1H), 4.39 (q,  $J = 7.2$  Hz, 1H), 3.84 (s, 3H), 1.50 (d,  $J = 7.2$  Hz, 3H).

**<sup>13</sup>C NMR** (101 MHz, CDCl<sub>3</sub>)  $\delta$  156.0, 131.6, 131.6, 128.1, 127.8, 127.7, 127.6, 123.9, 120.7, 110.3, 93.1, 81.7, 55.3, 26.1, 22.9.

**HR-MS** (ESI) calcd for C<sub>17</sub>H<sub>17</sub>O<sup>+</sup> ([M+H]<sup>+</sup>): 237.1274, found 237.1269;

**IR** (neat) 2973, 2932, 2836, 1596, 1491, 1459, 1242, 1115, 1075, 1051, 1029, 753, 691, 502 cm<sup>-1</sup>.

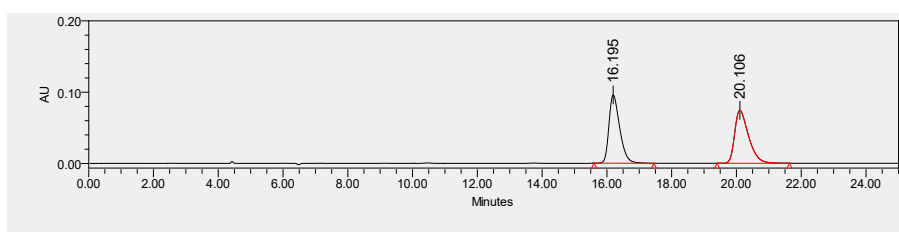

|   | Retention Time | Area    | % Area |
|---|----------------|---------|--------|
| 1 | 16.195         | 2210758 | 50.01  |
| 2 | 20.106         | 2210017 | 49.99  |

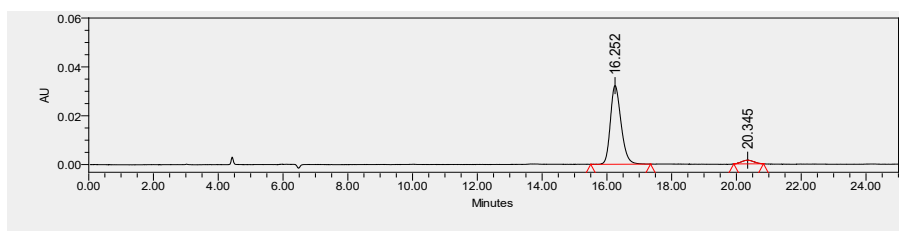

|   | Retention Time | Area   | % Area |
|---|----------------|--------|--------|
| 1 | 16.252         | 736009 | 94.80  |
| 2 | 20.345         | 40408  | 5.20   |

**(S)-1-chloro-2-(4-phenylbut-3-yn-2-yl)benzene (C31)**

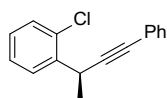

General procedure A for 48 h.

0.2 mmol scale; 40.2 mg, colorless oil, 84% yield, 95:5 *er*,  $[\alpha]_D^{20} = +55.8$  (c 0.80, CH<sub>2</sub>Cl<sub>2</sub>).

**HPLC** Chiralcel OD-H, hexane/isopropanol = 100/0, 1.0 mL/min,  $\lambda = 254$  nm,  $t_1 = 8.05$  min,  $t_2 = 8.85$  min

**<sup>1</sup>H NMR** (400 MHz, CDCl<sub>3</sub>)  $\delta$  7.74 (dd,  $J = 7.6, 1.6$  Hz, 1H), 7.48 - 7.41 (m, 2H), 7.36 - 7.33 (m, 1H), 7.32 - 7.25 (m, 4H), 7.20 - 7.15 (m, 1H), 4.44 (q,  $J = 7.2$  Hz, 1H), 1.55 (d,  $J = 7.2$  Hz, 3H).

**<sup>13</sup>C NMR** (101 MHz, CDCl<sub>3</sub>)  $\delta$  140.7, 132.5, 131.6, 129.5, 128.6, 128.2, 128.0, 127.9, 127.2, 123.5, 91.8, 82.4, 29.7, 22.9.

**HR-MS** (APCI) calcd for C<sub>16</sub>H<sub>14</sub>Cl<sup>+</sup> ( $[M+H]^+$ ): 241.0779, 243.0749, found 241.0780, 243.0752;

**IR** (neat) 3060, 2978, 2931, 1596, 1472, 1440, 1324, 1036, 753, 691, 562, 469 cm<sup>-1</sup>.

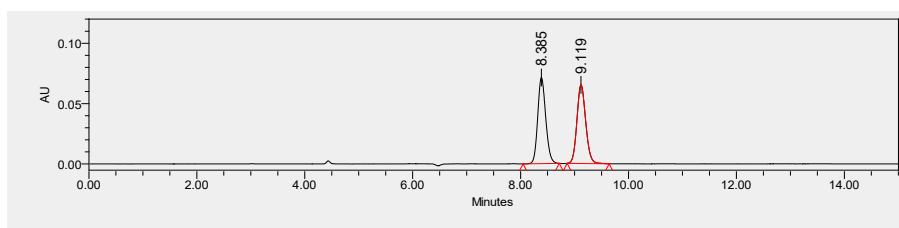

|   | Retention Time | Area   | % Area |
|---|----------------|--------|--------|
| 1 | 8.385          | 738749 | 49.97  |
| 2 | 9.119          | 739767 | 50.03  |

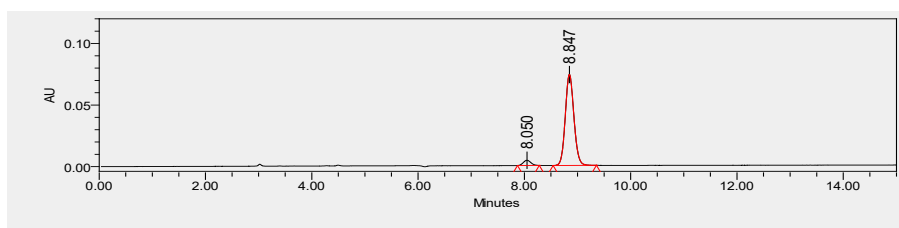

|   | Retention Time | Area   | % Area |
|---|----------------|--------|--------|
| 1 | 8.050          | 41657  | 4.77   |
| 2 | 8.847          | 832202 | 95.23  |

**(S)-1-bromo-2-(4-phenylbut-3-yn-2-yl)benzene (C32)**

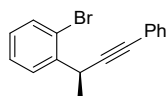

General procedure A for 48 h.

0.2 mmol scale; 48.6 mg, colorless oil, 85% yield, 95.5:4.5 *er*,  $[\alpha]_D^{20} = +62.3$  (c 0.97, CH<sub>2</sub>Cl<sub>2</sub>).

**HPLC** Chiralcel OD-H, hexane/isopropanol = 100/0, 1.0 mL/min,  $\lambda = 254$  nm,  $t_1 = 8.05$  min,  $t_2 = 8.85$  min

**<sup>1</sup>H NMR** (400 MHz, CDCl<sub>3</sub>)  $\delta$  7.75 (dd,  $J = 8.0, 1.6$  Hz, 1H), 7.53 (dd,  $J = 8.0, 1.2$  Hz, 1H), 7.48 - 7.41 (m, 2H), 7.36 - 7.25 (m, 4H), 7.14 - 7.06 (m, 1H), 4.42 (q,  $J = 7.2$  Hz, 1H), 1.54 (d,  $J = 7.2$  Hz, 3H).

**<sup>13</sup>C NMR** (101 MHz, CDCl<sub>3</sub>)  $\delta$  142.4, 132.8, 131.6, 128.8, 128.3, 128.2, 127.9, 123.5, 123.0, 91.9, 82.5, 32.3, 23.1.

**HR-MS** (ESI) calcd for C<sub>16</sub>H<sub>14</sub>Br<sup>+</sup> ([M+H]<sup>+</sup>): 285.0273, found 285.0268;

**IR** (neat) 3058, 2977, 2930, 1595, 1567, 1489, 1469, 1438, 1323, 1023, 753, 691, 561, 461 cm<sup>-1</sup>.

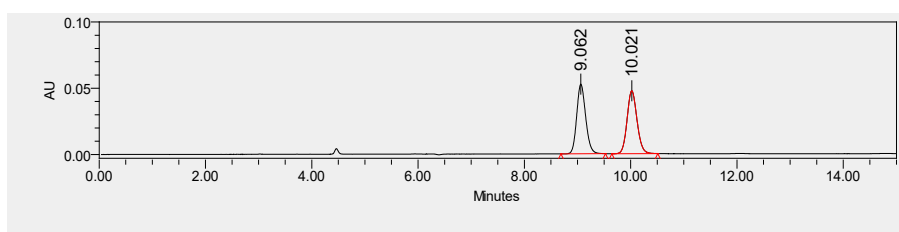

|   | Retention Time | Area   | % Area |
|---|----------------|--------|--------|
| 1 | 9.062          | 615860 | 50.00  |
| 2 | 10.021         | 615763 | 50.00  |

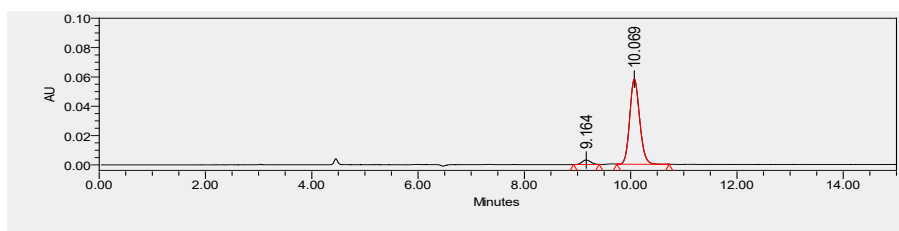

|   | Retention Time | Area   | % Area |
|---|----------------|--------|--------|
| 1 | 9.164          | 35119  | 4.46   |
| 2 | 10.069         | 751486 | 95.54  |



**(S)-2-(4-phenylbut-3-yn-2-yl)naphthalene (C33)**

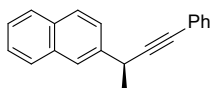

General procedure A for 48 h.

0.2 mmol scale; 44.4 mg, white solid, m.p. 81.9-83.1 °C, 87% yield, 85:15 *er*,  $[\alpha]_D^{20} = +17.1$  (c 0.89, CH<sub>2</sub>Cl<sub>2</sub>).

**HPLC** Chiralcel OD-H, hexane/isopropanol = 99/1, 1.0 mL/min,  $\lambda = 254$  nm,  $t_1 = 6.18$  min,  $t_2 = 6.68$  min

**<sup>1</sup>H NMR** (400 MHz, CDCl<sub>3</sub>) 7.88 - 7.87(m, 1H), 7.85 - 7.78 (m, 3H), 7.58 - 7.55 (m, 1H), 7.45 (m, 4H), 4.13 (q,  $J = 7.2$  Hz, 1H), 1.65 (d,  $J = 7.2$  Hz, 3H).

**<sup>13</sup>C NMR** (101 MHz, CDCl<sub>3</sub>)  $\delta$  140.6, 133.5, 132.4, 131.6, 131.4, 128.3, 128.2, 127.8, 127.7, 127.6, 126.0, 125.6, 125.1, 123.7, 92.5, 82.6, 32.6, 24.3.

**HR-MS** (ESI) calcd for C<sub>20</sub>H<sub>17</sub><sup>+</sup> ([M+H]<sup>+</sup>): 257.1325, found 257.1335;

**IR** (neat) 3054,2975, 2929, 1599, 1489, 1445, 1368, 1302, 1072, 856, 818, 751, 691, 478 cm<sup>-1</sup>.

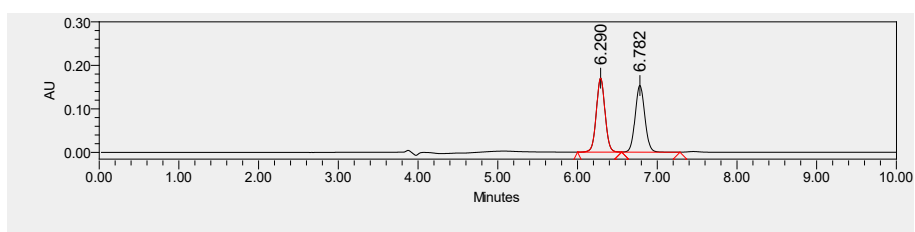

|   | Retention Time | Area    | % Area |
|---|----------------|---------|--------|
| 1 | 6.290          | 1300656 | 50.09  |
| 2 | 6.782          | 1296053 | 49.91  |

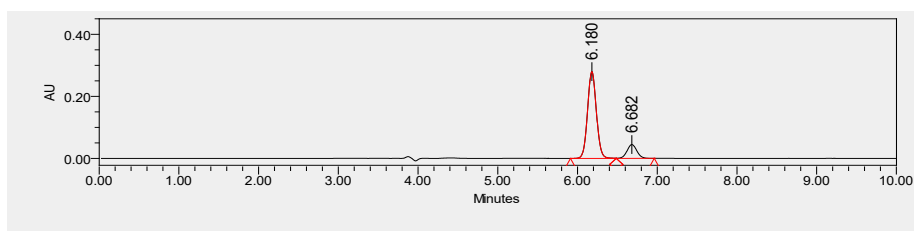

|   | Retention Time | Area    | % Area |
|---|----------------|---------|--------|
| 1 | 6.180          | 2159212 | 85.00  |
| 2 | 6.682          | 381110  | 15.00  |

**(S)-4-(4-phenylbut-3-yn-2-yl)-1,1'-biphenyl (C34)**

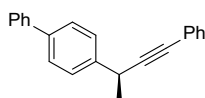

General procedure A for 48 h.

0.2 mmol scale; 48.7 mg, colorless oil, 86% yield, 80.5:19.5 *er*;  $[\alpha]_D^{20} = +12.3$  (c 0.97, CH<sub>2</sub>Cl<sub>2</sub>).

**HPLC** Chiralcel OD-H, hexane/isopropanol = 99/1, 1.0 mL/min,  $\lambda = 254$  nm,  $t_1 = 7.58$  min,  $t_2 = 10.75$  min

**<sup>1</sup>H NMR** (400 MHz, CDCl<sub>3</sub>)  $\delta$  7.61 - 7.55 (m, 4H), 7.53 - 7.50 (m, 2H), 7.48 - 7.39 (m, 4H), 7.36 - 7.24 (m, 4H), 4.02 (q,  $J = 7.2$  Hz, 1H), 1.61 (d,  $J = 7.2$  Hz, 3H).

**<sup>13</sup>C NMR** (101 MHz, CDCl<sub>3</sub>)  $\delta$  142.4, 140.9, 139.6, 131.6, 128.7, 128.5, 128.2, 127.8, 127.4, 127.3, 127.1, 127.0, 123.6, 92.5, 82.5, 32.1, 24.4.

**HR-MS** (ESI) calcd for C<sub>22</sub>H<sub>19</sub><sup>+</sup> ([M+H]<sup>+</sup>): 283.1481, found 283.1490;

**IR** (neat) 3028, 2975, 2929, 1685, 1599, 1486, 1447, 1299, 1075, 1005, 838, 759, 694, 570, 510 cm<sup>-1</sup>.

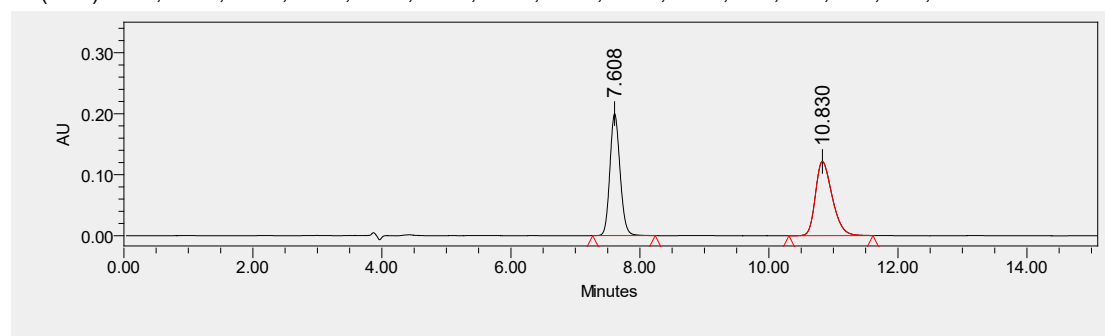

|   | Retention Time | Area    | % Area |
|---|----------------|---------|--------|
| 1 | 7.608          | 2185618 | 50.03  |
| 2 | 10.830         | 2182923 | 49.97  |

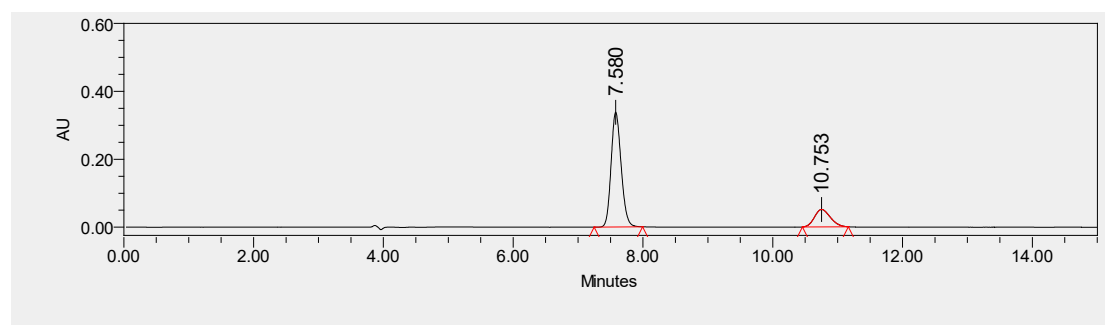

|   | Retention Time | Area    | % Area |
|---|----------------|---------|--------|
| 1 | 7.580          | 3637457 | 80.66  |
| 2 | 10.753         | 872335  | 19.34  |

## 7. X-ray crystal data

The structure of the catalyst **G-TqPy**<sup>(S)-tBu</sup> was determined by X-ray chromatography analysis.

Single crystal of **G-TqPy**<sup>(S)-tBu</sup> was obtained by recrystallization in petroleum ether and ethyl acetate at room temperature in a 10 mL glassware bottle.

The crystal data and further details are listed in Table S8.

CCDC 2182833 (**G-TqPy**<sup>(S)-tBu</sup>) contains the supplementary crystallographic data for this paper. These data are provided free of charge by The Cambridge Crystallographic Data Centre.

The colourless crystal in block-shape, with approximate dimensions of 0.279 × 0.234 × 0.160 mm<sup>3</sup>, was selected and mounted for the single-crystal X-ray diffraction. The data set was collected by Bruker D8 Venture Photon II diffractometer at 173(2)K equipped with micro-focus Cu radiation source ( $K_{\alpha} = 1.54178\text{\AA}$ ). Applied with face-indexed numerical absorption correction, the structure solution was solved and refinement was processed by SHELXTL (version 6.14) and OLEX 2.3 program package<sup>a, b, c, d</sup>. The structure was analyzed by ADDSYM routine implemented in PLATON suite and no higher symmetry was suggested<sup>e</sup>.

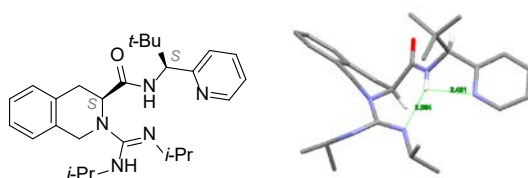

Datablock lj008 - ellipsoid plot

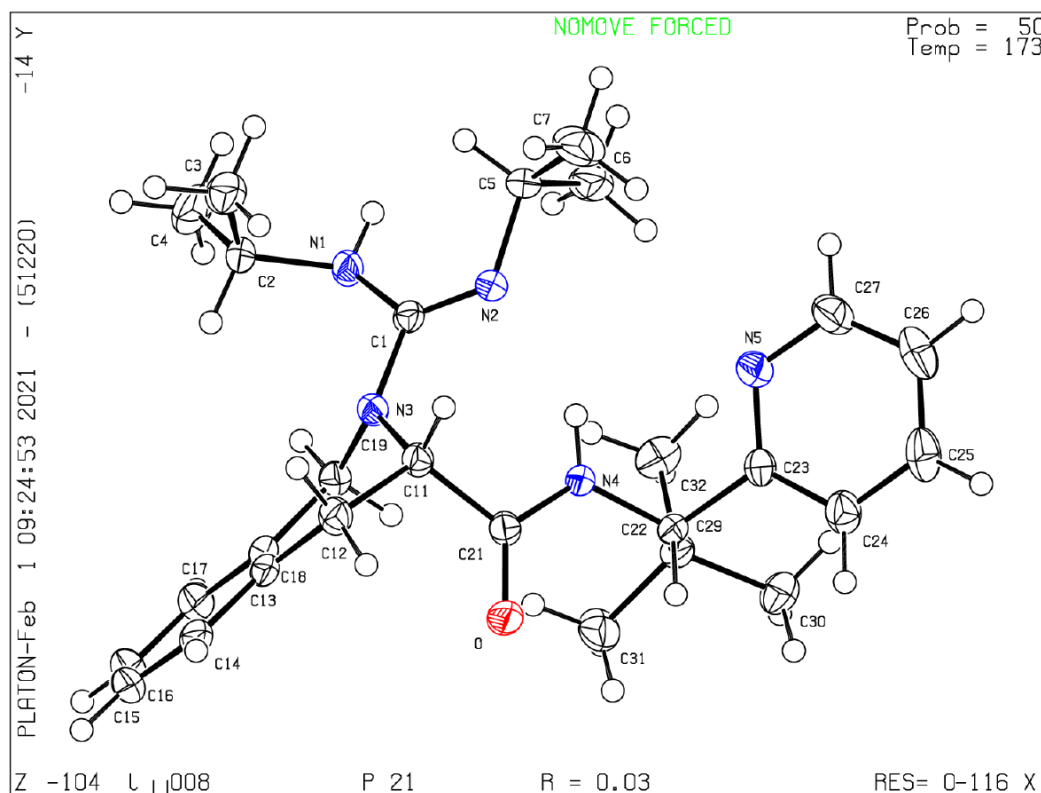

**Figure S7.** the thermal ellipsoid figure of **G-TqPy**<sup>(S)-tBu</sup> with 50% probabilities

**Table S8.** Crystallographic Data for C<sub>27</sub>H<sub>39</sub>N<sub>5</sub>O

|                                                   |                                                  |
|---------------------------------------------------|--------------------------------------------------|
| Formula                                           | C <sub>27</sub> H <sub>39</sub> N <sub>5</sub> O |
| Formula mass (amu)                                | 449.63                                           |
| Space group                                       | P 21                                             |
| <i>a</i> (Å)                                      | 9.0124(2)                                        |
| <i>c</i> (Å)                                      | 14.6098(4)                                       |
| <i>c</i> (Å)                                      | 10.7090(3)                                       |
| $\alpha$ (deg)                                    | 90                                               |
| $\beta$ (deg)                                     | 110.238(1)                                       |
| $\gamma$ (deg)                                    | 90                                               |
| <i>V</i> (Å <sup>3</sup> )                        | 1323.00(6)                                       |
| <i>Z</i>                                          | 2                                                |
| $\lambda$ (Å)                                     | 1.54178                                          |
| <i>T</i> (K)                                      | 173 K                                            |
| $\rho_{\text{calcd}}$ (g cm <sup>-3</sup> )       | 1.129                                            |
| $\mu$ (mm <sup>-1</sup> )                         | 0.548                                            |
| Transmission factors                              | 0.860, 0.970                                     |
| $2\theta_{\text{max}}$ (deg)                      | 68.264                                           |
| No. of unique data, including $F_o^2 < 0$         | 4774                                             |
| No. of unique data, with $F_o^2 > 2\sigma(F_o^2)$ | 4722                                             |
| No. of variables                                  | 313                                              |
| $R(F)$ for $F_o^2 > 2\sigma(F_o^2)$ <sup>a</sup>  | 0.0261                                           |
| $R_w(F_o^2)$ <sup>b</sup>                         | 0.0669                                           |
| Goodness of fit                                   | 1.083                                            |

<sup>a</sup>  $R(F) = \sum ||F_o| - |F_c|| / \sum |F_o|$ .

<sup>b</sup>  $R_w(F_o^2) = [\sum [w(F_o^2 - F_c^2)^2] / \sum wF_o^4]^{1/2}$ ;  $w^{-1} = [\sigma^2(F_o^2) + (A\rho)^2 + B\rho]$ , where  $\rho = [\max(F_o^2, 0) + 2F_c^2] / 3$ .

References:

<sup>a</sup> Sheldrick, G. M. *Acta Cryst.* **2008**, *A64*, 112–122.

<sup>b</sup> Sheldrick, G. M. *Acta Cryst.* **2015**, *A71*, 3–8.

<sup>c</sup> Sheldrick, G. M. *Acta Cryst.* **2015**, *C71*, 3–8.

<sup>d</sup> Dolomanov, O.V., Bourhis, L.J., Gildea, R.J., Howard, J. A. K., Puschmann, H. *J. Appl. Cryst.* **2009**, *42*, 339–341.

<sup>e</sup> Spek, A. L. *J. Appl. Cryst.* **2003**, *36*, 7–13.

## 8. Mechanistic Studies

### 8.1 Radical trapping experiment with TEMPO:

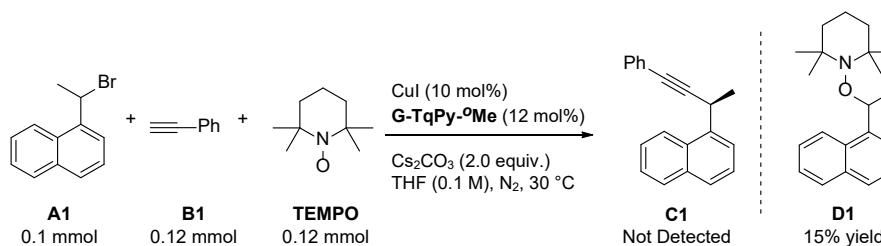

Under nitrogen atmosphere, an over-dried reaction tube charged with alkyl halide (0.10 mmol, 1.0 equiv.), TEMPO (0.12 mmol, 0.2 equiv.),  $\text{CuI}$  (10 mol %), **G<sup>2</sup>-TqPy-oMe** (12 mol %),  $\text{Cs}_2\text{CO}_3$  (2.0 equiv.), and anhydrous THF (1.0 mL). Then, alkyne (0.12 mmol, 1.2 equiv.) was sequentially added to the mixture and the reaction mixture was stirred at 30 °C for 24 h. Upon completion (monitored by TLC), THF was evaporated in vacuo, then the crude mixture was purified by flash chromatography on silica gel (eluent: PE/EtOAc = 19:1) to afford the TEMPO adduct (4.6 mg, 15%yield).

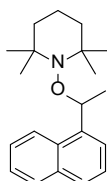

**<sup>1</sup>H NMR** (400 MHz, Chloroform-*d*)  $\delta$  8.19 - 8.16 (m, 1H), 7.88 - 7.82 (m, 1H), 7.74 - 7.71 (m, 1H), 7.57 - 7.55 (m, 1H), 7.51 - 7.42 (m, 3H), 5.45 (q,  $J$  = 6.8 Hz, 1H), 1.65 (d,  $J$  = 6.8 Hz, 3H), 1.53 (brs, 3H), 1.42 - 1.40 (m, 5H), 1.25 - 1.24 (m, 4H), 1.01 (brs, 3H), 0.62 (brs, 3H).

**<sup>13</sup>C NMR** (101 MHz,  $\text{CDCl}_3$ )  $\delta$  142.4, 133.8, 130.3, 128.7, 127.0, 125.5, 125.4, 125.2, 124.4, 123.8, 82.2, 59.80, 40.3, 34.7, 33.6, 23.8, 20.5, 17.18.

**HR-MS** (ESI) calcd for  $\text{C}_{21}\text{H}_{30}\text{NO}^+$  ( $[\text{M}+\text{H}]^+$ ): 312.2322, found 312.2317;

## 8.2 NMR Analysis of G and G/Cu<sup>I</sup>:

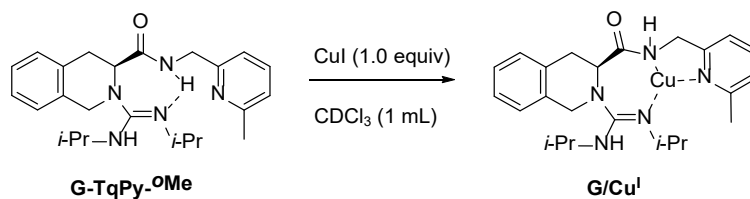

Under nitrogen atmosphere, an over-dried reaction tube charged with CuI (7.6 mg, 0.04 mmol), **G-TqPy-OMe** (16.3 mg, 0.04 mmol) and CDCl<sub>3</sub> (1.0 mL). The mixture was stirred at r.t. for 30 mins. The mixture was filtered through a syringe filter and transferred into an NMR tube for recording the <sup>1</sup>H NMR.

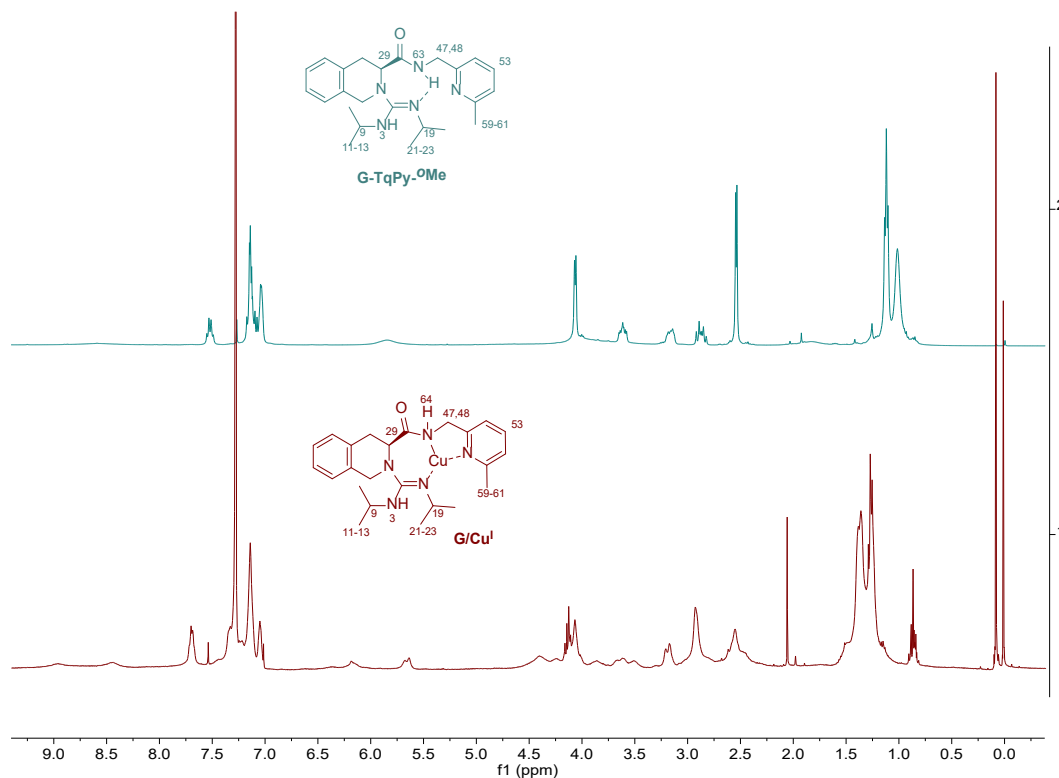

**Figure S9.** Stacking <sup>1</sup>H NMR spectrum of G and CuI/G . (green color: G; red color: CuI/G)

|                   | H <sub>3</sub> | H <sub>9</sub> | H <sub>11-13</sub> | H <sub>19</sub> | H <sub>21-23</sub> | H <sub>53</sub> | H <sub>59-61</sub> | H <sub>64</sub> |
|-------------------|----------------|----------------|--------------------|-----------------|--------------------|-----------------|--------------------|-----------------|
| G                 | 5.86           | ~              | 1.02               | ~               | 1.12               | 7.52            | 2.54               | 8.58            |
| G/Cu <sup>I</sup> | 6.16, 5.63     | 2.94           | 1.28               | 2.94            | 1.39               | 7.68            | 2.56               | 8.98, 8.45      |
| δ                 |                | ~              | 0.26               | ~               | 0.27               | 0.16            | 0.02               |                 |

### 8.3 ESI-MS analysis of catalytic system:

Under nitrogen atmosphere, an over-dried reaction tube charged with **A1** (11.7 mg, 0.05 mmol, 1.0 equiv.), CuI (0.9 mg, 0.005 mmol, 10 mol %), **G-TqPy-oMe** (2.4 mg, 0.006 mmol, 12 mol %), Cs<sub>2</sub>CO<sub>3</sub> (32.6 mg, 0.1 mmol, 2.0 equiv.), and anhydrous THF (0.5 mL). Then, alkyne **B1** (8.4 μL, 0.075 mmol, 1.5 equiv.) was sequentially added to the mixture. The reaction mixture was stirred at 30 °C for 30 mins. An aliquot was taken up with the syringe through the filter and diluted 1000 times in the dilution vial. Lastly, the mixture was transferred to a glass syringe and taken for mass measurement. The mass spectra are listed in accordance as: the free catalyst **G-TqPy-oMe**, G/Cu<sup>I</sup>, G/Cu<sup>II</sup>Br, G/Cu<sup>II</sup>I, G/Cu<sup>III</sup>/A1/B1 adduct.

ESI-MS (m/z) calculated for [**G-TqPy-oMe**/H<sup>+</sup>]<sup>+</sup> (C<sub>24</sub>H<sub>34</sub>N<sub>5</sub>O<sup>+</sup>): 408.28, found 408.37;

ESI-MS (m/z) calculated for [(**G-H**<sup>+</sup>)/Cu<sup>2+</sup>]<sup>+</sup> (C<sub>24</sub>H<sub>32</sub>CuN<sub>5</sub>O<sup>+</sup>): 469.19, found 469.28;

ESI-MS (m/z) calculated for [**G**/Cu<sup>2+</sup>Br]<sup>+</sup> (C<sub>24</sub>H<sub>33</sub>BrCuN<sub>5</sub>O<sup>+</sup>): 549.11, 551.11, found 549.18, 551.23;

ESI-MS (m/z) calculated for [**G**/Cu<sup>2+</sup>I]<sup>+</sup> (C<sub>24</sub>H<sub>33</sub>ICuN<sub>5</sub>O<sup>+</sup>): 597.10, 599.10; found 597.18, 599.22;

ESI-MS (m/z) calculated for [(**G-H**<sup>+</sup>)/Cu<sup>3+</sup>/PhCC/**R**]<sup>+</sup> (C<sub>44</sub>H<sub>48</sub>CuN<sub>5</sub>O<sup>+</sup>): 725.32, found 725.54;

Cu #804 RT: 7.0826 AV: 1 NL: 5.29E6  
T: + c ESIQ1MS [400.000-700.000]

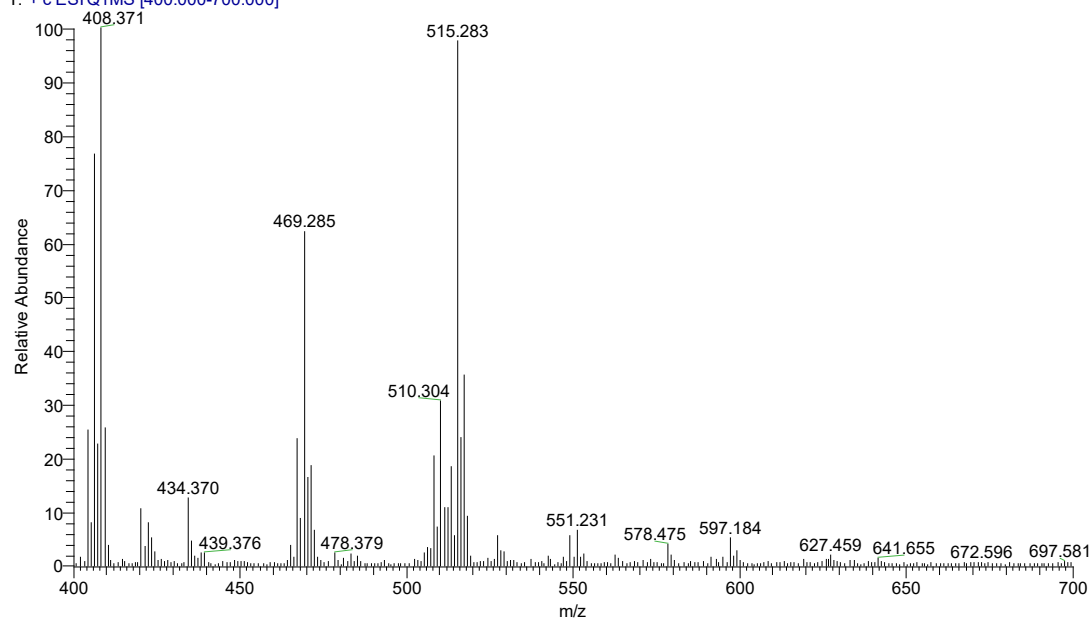

Figure S10. Overview of the ESI-MS (positive mode) of catalytic system.

Cu #804 RT: 7.0826 AV: 1 NL: 5.29E6  
T: + cESI Q1MS [400.000-700.000]

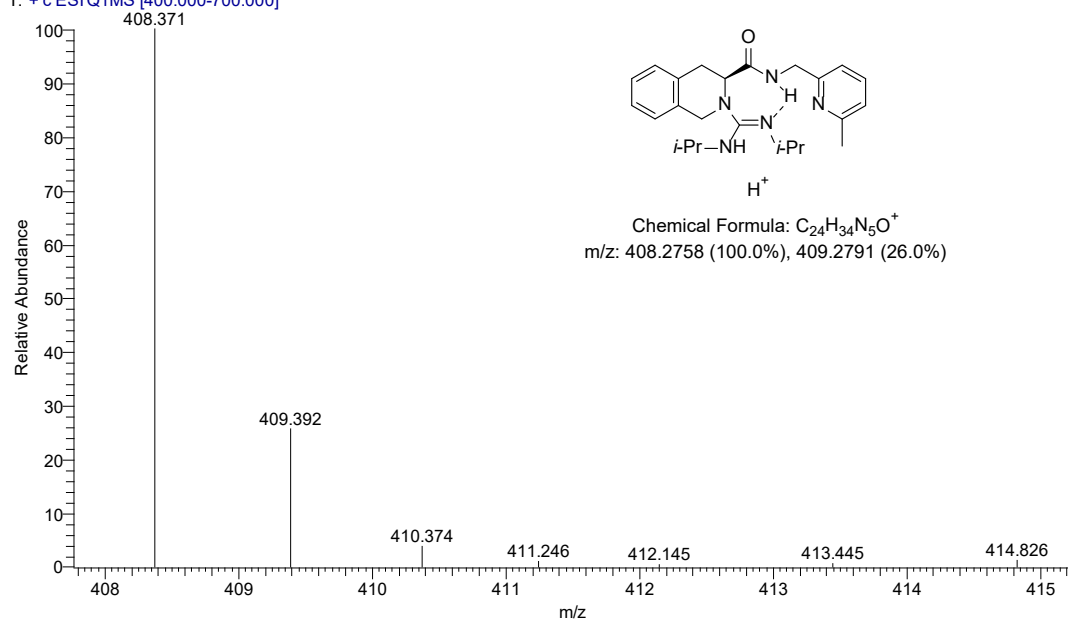

C<sub>24</sub>H<sub>33</sub>N<sub>5</sub>O +H: C<sub>24</sub> H<sub>34</sub> N<sub>5</sub> O<sub>1</sub> pa Chrg 1

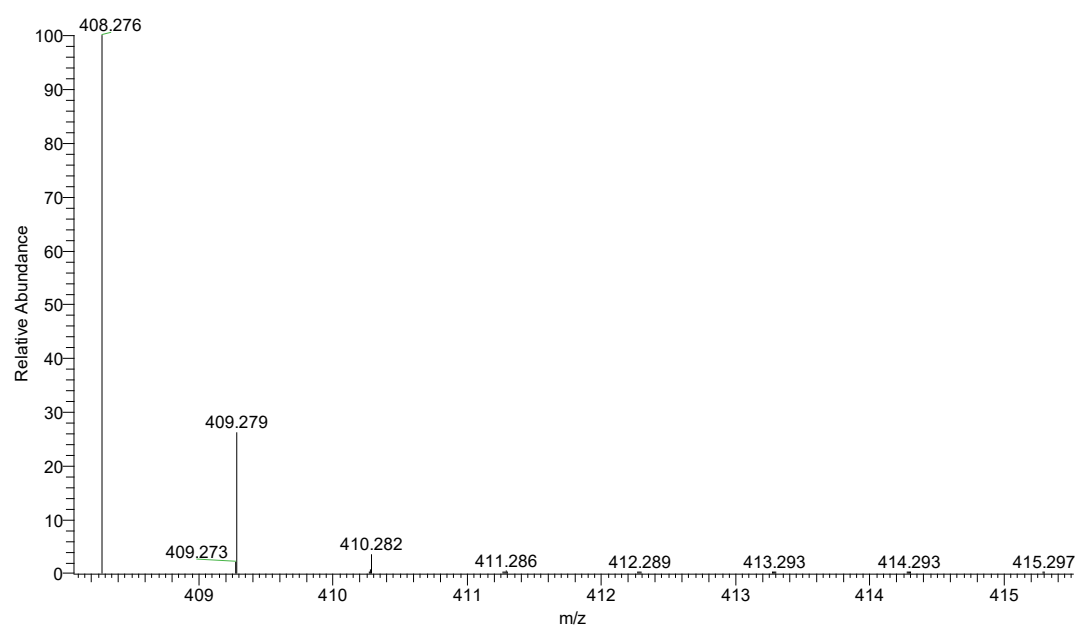

**Figure S11.** Zoomed-in view of the ESI-MS (positive mode) of **G<sup>2</sup>-TqPy-oMe** (top) and simulation of [M]<sup>+</sup> below.



Cu #804 RT: 7.0826 AV: 1 NL: 3.29E6  
T: + cESI Q1MS [400.000-700.000]

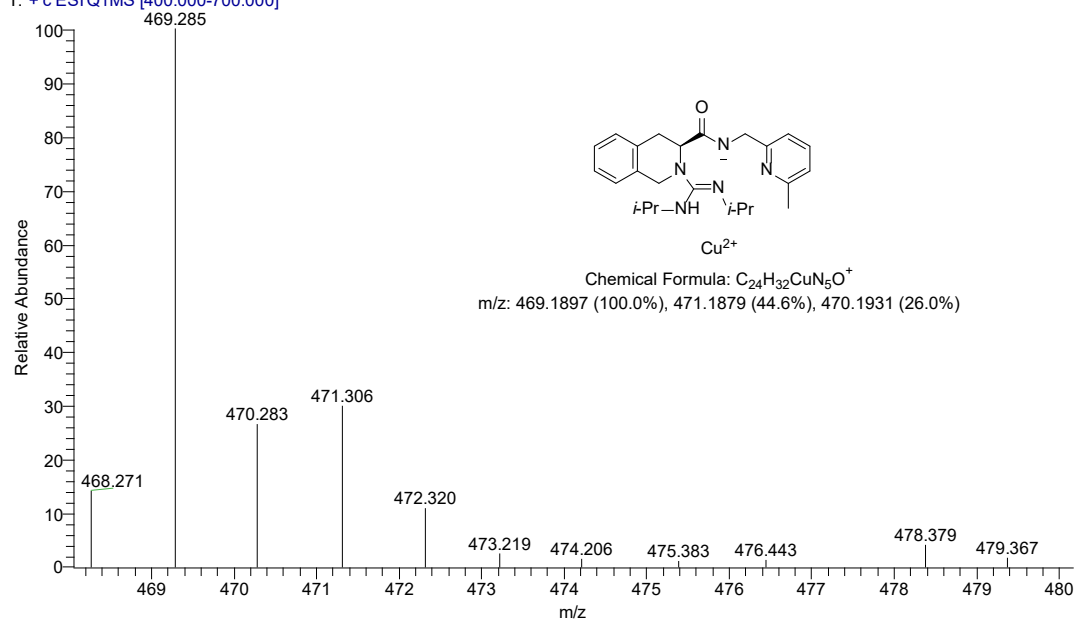

C<sub>24</sub>H<sub>32</sub>CuN<sub>5</sub>O<sup>+</sup>: C<sub>24</sub> H<sub>32</sub> Cu<sub>1</sub> N<sub>5</sub> O<sub>1</sub> pa Chrg 1

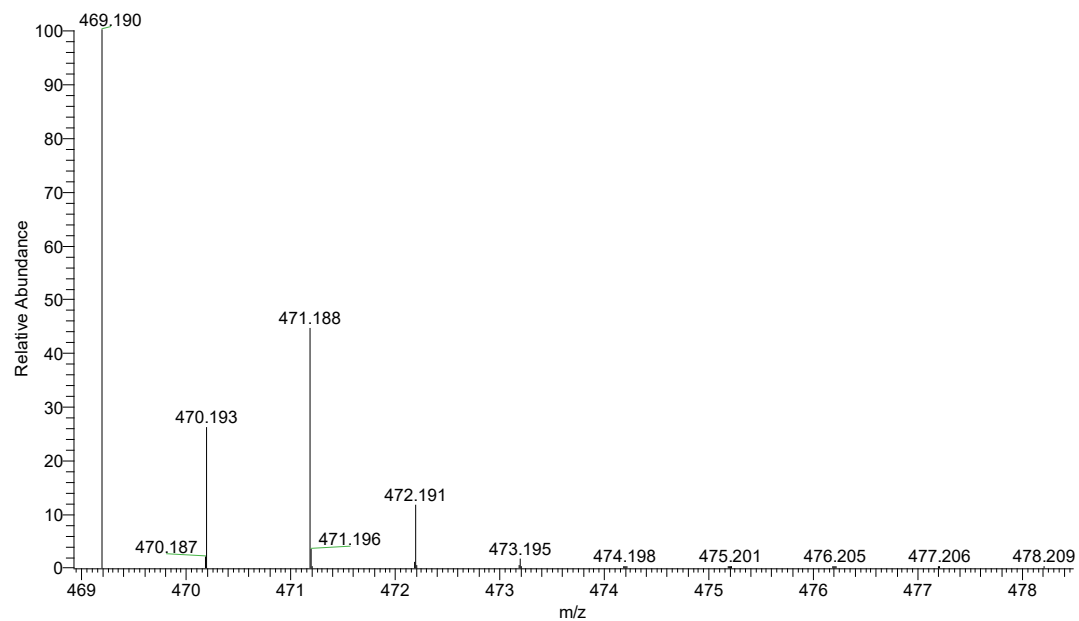

**Figure S12.** Zoomed-in view of the ESI-MS (positive mode) of  $(G-H)^+/Cu^{2+}$  (top) and simulation of  $[M]^+$  below.

Cu #804 RT: 7.0826 AV: 1 NL: 3.47E5  
T: + cESI Q1MS [400.000-700.000]

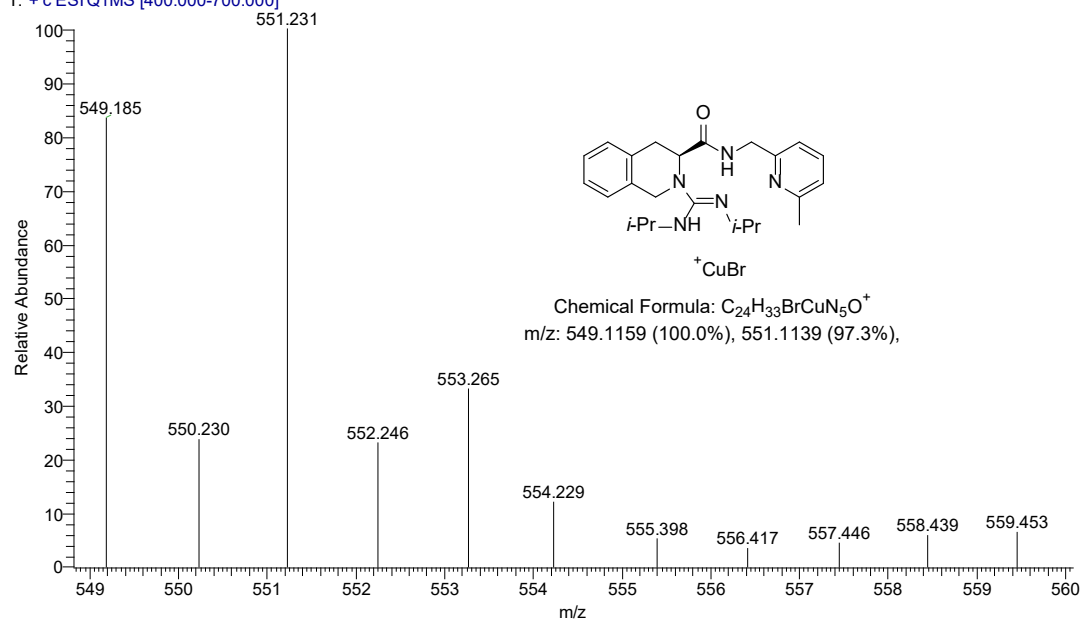

C24H33BrCuN5O+: C24 H33 Br1 Cu1 N5 O1 pa Chrg 1

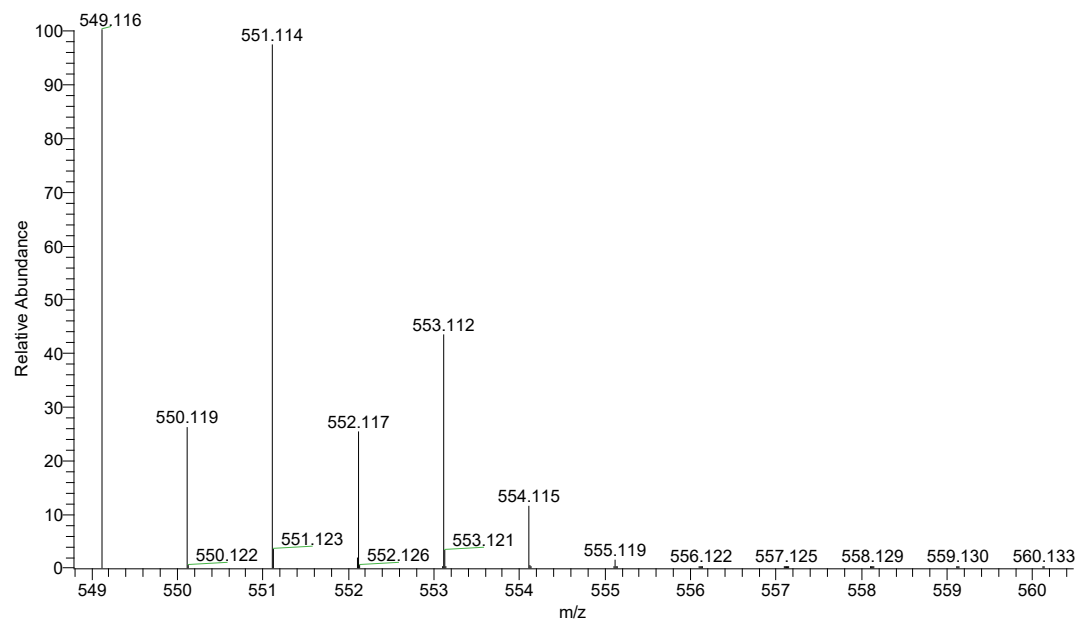

**Figure S13.** Zoomed-in view of the ESI-MS (positive mode) of  $G/Cu^{2+}Br$  (top) and simulation of  $[M]^+$  below.

Cu #804 RT: 7.0826 AV: 1 NL: 2.71E5  
T: + cESI Q1MS [400.000-700.000]

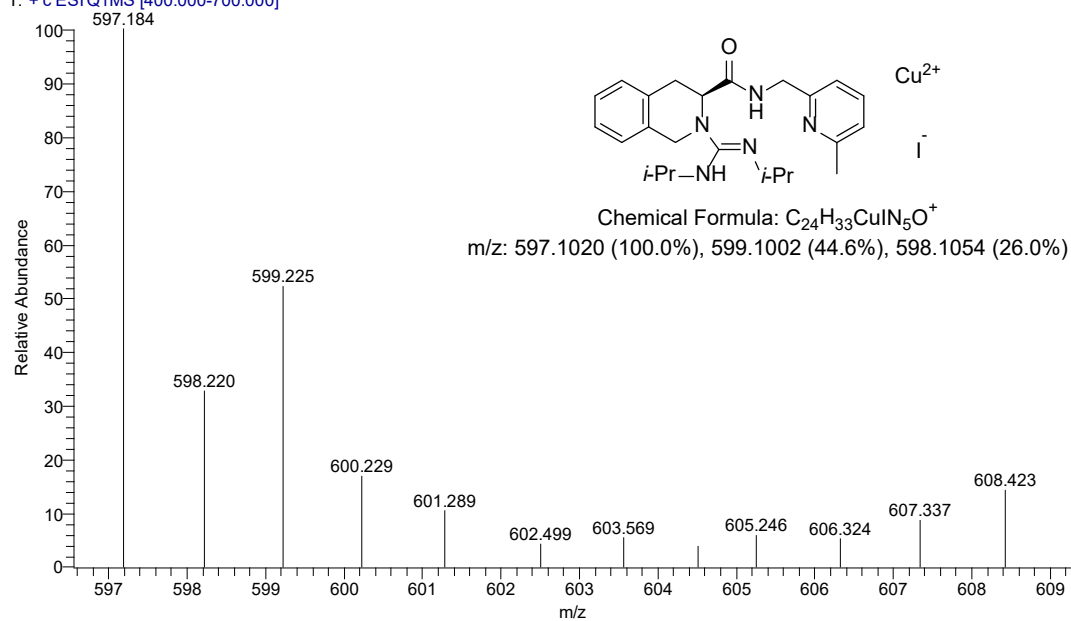

C24H33CuIN5O+: C24 H33 Cu1 I1 N5 O1 pa Chrg 1

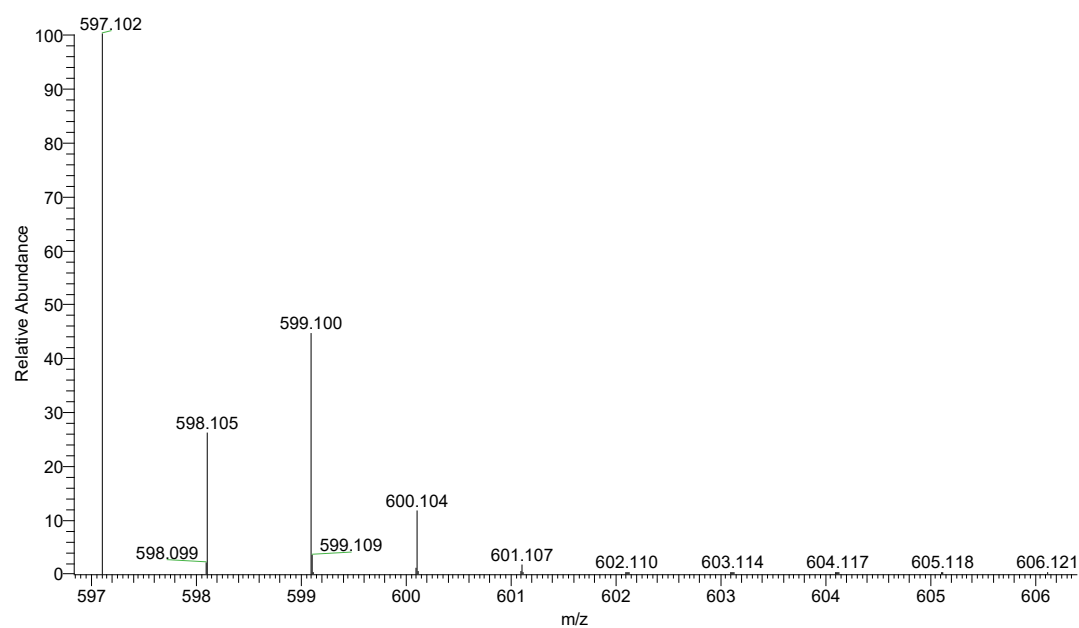

**Figure S13.** Zoomed-in view of the ESI-MS (positive mode) of  $G/Cu^{2+}I$  (top) and simulation of  $[M]^+$  below.

Cu #1213 RT: 10.7128 AV: 1 NL: 1.53E6  
T: +cESI Q1MS [700.000-750.000]

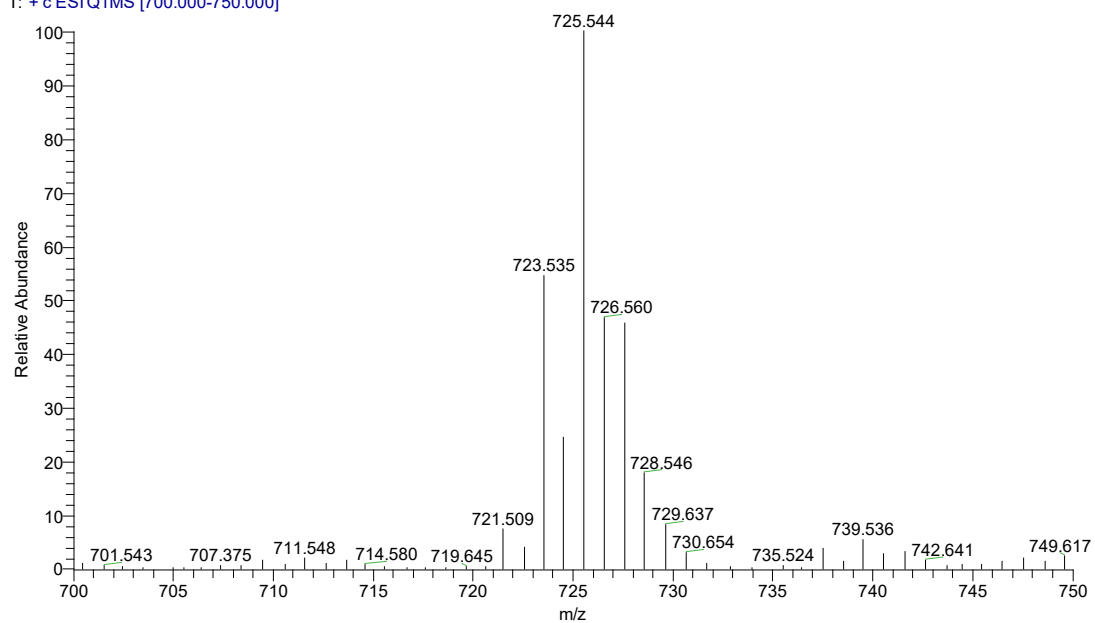

**Figure S14.** Overview of the ESI-MS (positive mode) of catalytic system.

Cu #1213 RT: 10.7128 AV: 1 NL: 1.53E6  
T: +cESI Q1MS [700.000-750.000]

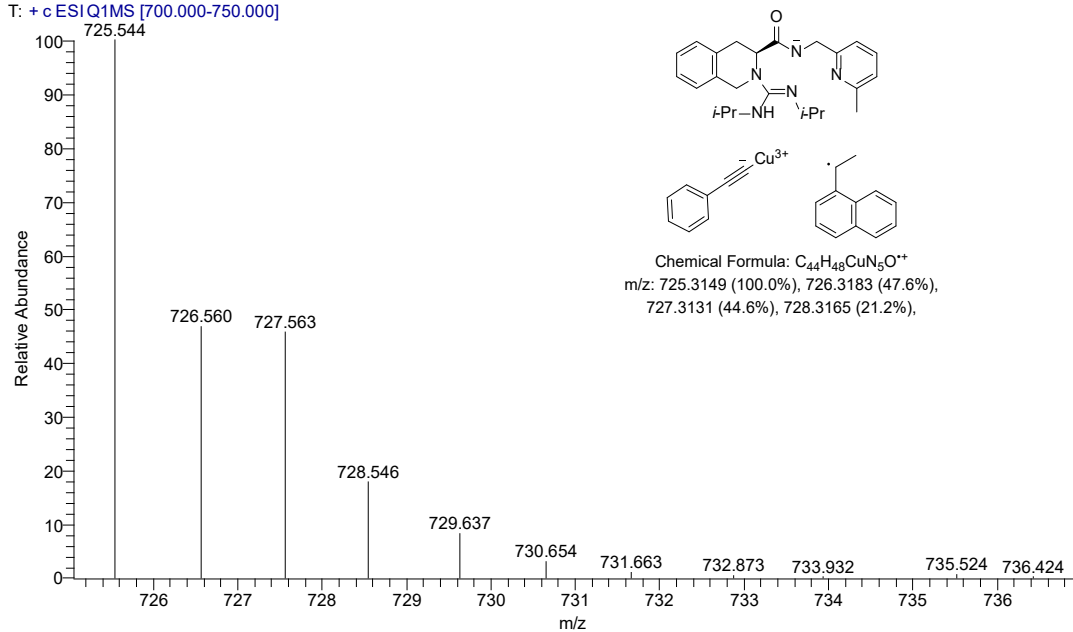

C44H48CuN5O+: C44 H48 Cu1 N5 O1 pa Chrg 1

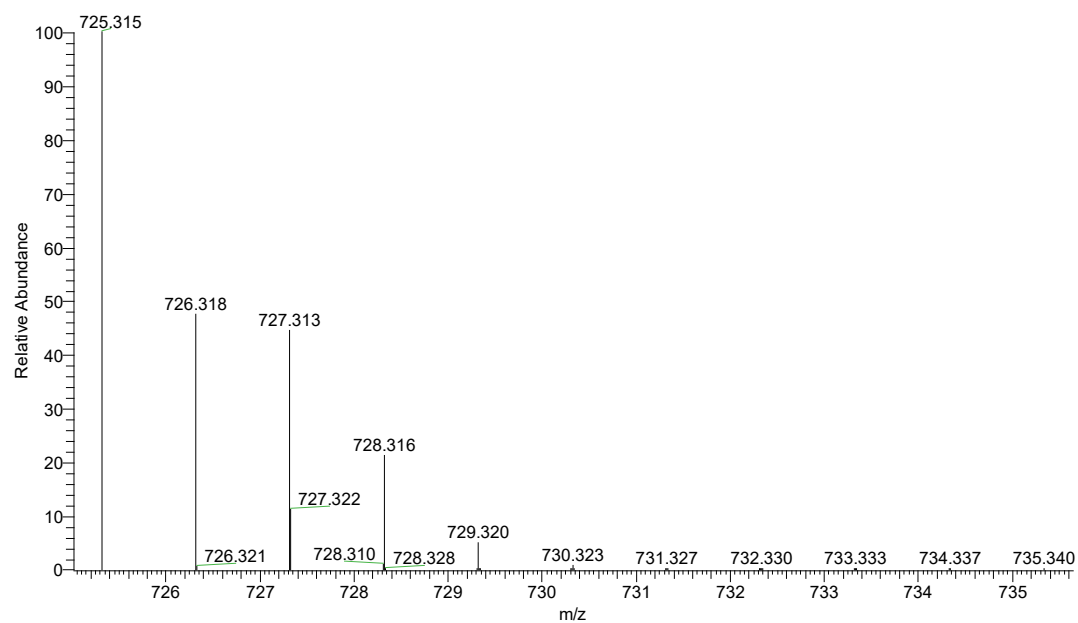

**Figure S15.** Zoomed-in view of the ESI-MS (positive mode) of  $(G-H)^+/Cu^{3+}/PhCC/R^+$  (top) and simulation of  $[M]^+$  below.

#### 8.4 EPR analysis of catalytic system:

##### Experiment for independent synthesis of the Cu<sup>II</sup> intermediate.

Under nitrogen atmosphere, an over-dried reaction tube charged with CuBr<sub>2</sub> (1.1 mg, 0.005 mmol), **G-TqPy-oMe** (2.0 mg, 0.005 mmol), alkyne **B1** (8.4 μL, 0.075 mmol, 15.0 equiv.) and anhydrous THF (0.5 mL). The reaction mixture was stirred at 30 °C for 30 mins. An aliquot of the reaction mixture (0.50 mL) was transferred to an EPR tube under a nitrogen atmosphere for X-band EPR measurement at 100K.

##### Experiment for detection of the Cu<sup>II</sup> species in the reaction system without **B1**.

Under nitrogen atmosphere, an over-dried reaction tube charged with **A1** (11.7 mg, 0.05 mmol, 1.0 equiv.), CuBr (0.6 mg, 0.005 mmol, 10 mol %), **G-TqPy-oMe** (2.4 mg, 0.006 mmol, 12 mol %), Cs<sub>2</sub>CO<sub>3</sub> (32.6 mg, 0.1 mmol, 2.0 equiv.), and anhydrous THF (0.5 mL). The reaction mixture was stirred at 30 °C for 30 mins. An aliquot of the reaction mixture (0.50 mL) was transferred to an EPR tube under a nitrogen atmosphere for X-band EPR measurement at 100K.

##### Experiment for detection of the Cu<sup>II</sup> species in the reaction system.

Under nitrogen atmosphere, an over-dried reaction tube charged with **A1** (11.7 mg, 0.05 mmol, 1.0 equiv.), CuBr (0.6 mg, 0.005 mmol, 10 mol %), **G-TqPy-oMe** (2.4 mg, 0.006 mmol, 12 mol %), Cs<sub>2</sub>CO<sub>3</sub> (32.6 mg, 0.1 mmol, 2.0 equiv.), and anhydrous THF (0.5 mL). Then, alkyne **B1** (8.4 μL, 0.075 mmol, 1.5 equiv.) was sequentially added to the mixture. The reaction mixture was stirred at 30 °C for 30 mins. An aliquot of the reaction mixture (0.50 mL) was transferred to an EPR tube under a nitrogen atmosphere for X-band EPR measurement at 100K.

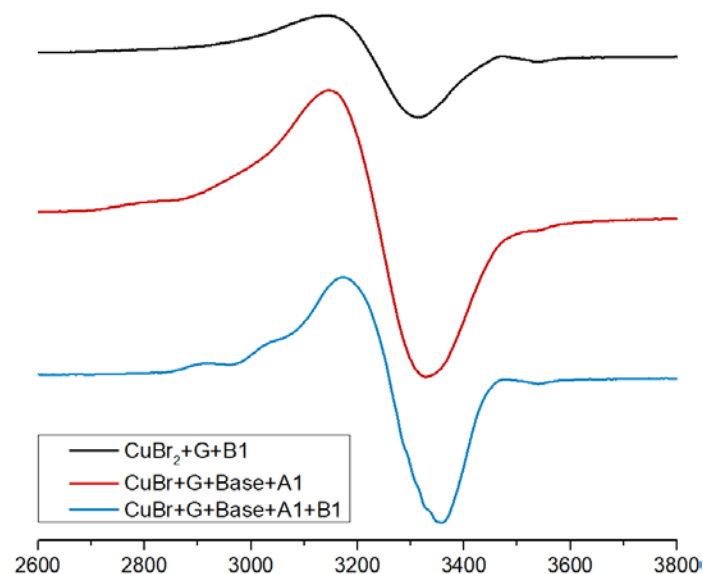

**Figure S16.** X-band EPR spectrum (9.42 GHz, 100K). Black: a mixture of CuBr<sub>2</sub>, **G-TqPy-oMe** and **B1**. Red: a mixture of CuBr, **G-TqPy-oMe**, Cs<sub>2</sub>CO<sub>3</sub> and **A1**. Blue: a mixture of CuBr, **G-TqPy-oMe**, Cs<sub>2</sub>CO<sub>3</sub>, **A1** and **B1**.

#### 8.5 Cyclic voltammogram (CV) analysis of the catalysts

Cyclic Voltammetry experiments were performed using a CH Instruments Electrochemical Workstation model CHI620E, scan rate = 0.1 V/s, 2 sweep segments, sample interval = 0.001 V. The electrochemical cell was equipped with a glassy carbon disk working electrode (3mm diameter) and a Pt wire counter electrode and the potentials were calibrated with Fc as an internal standard. The samples (CuBr 10nM, CuBr/G 5nM) were

prepared under the protection of the  $N_2$  by dissolving them in degassed  $CH_3CN$  (0.1 M  $Bu_4NPF_6$ ) directly and stirred for 1min.

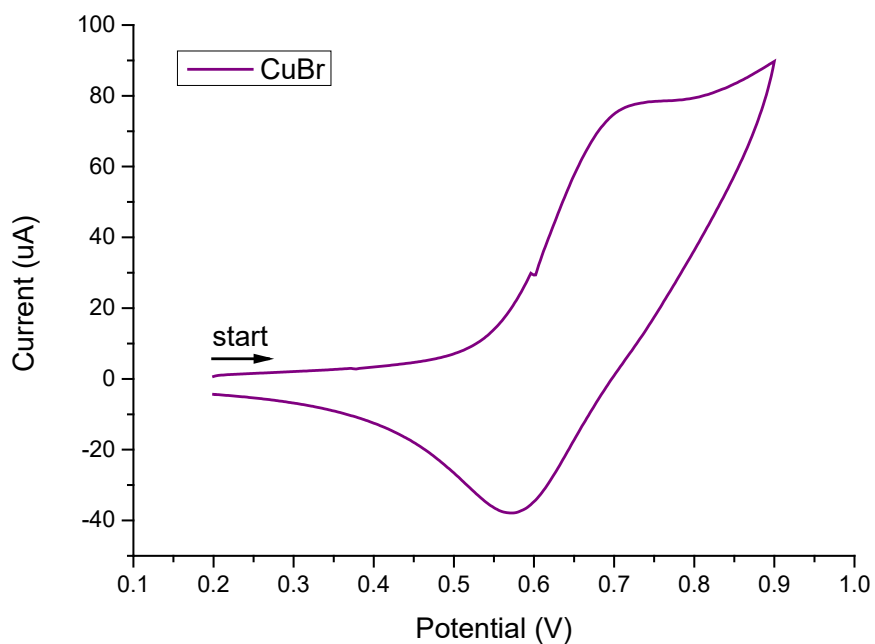

**Figure S17.** CVs of the CuBr (10 mM), calibrated with Fc as an internal standard.

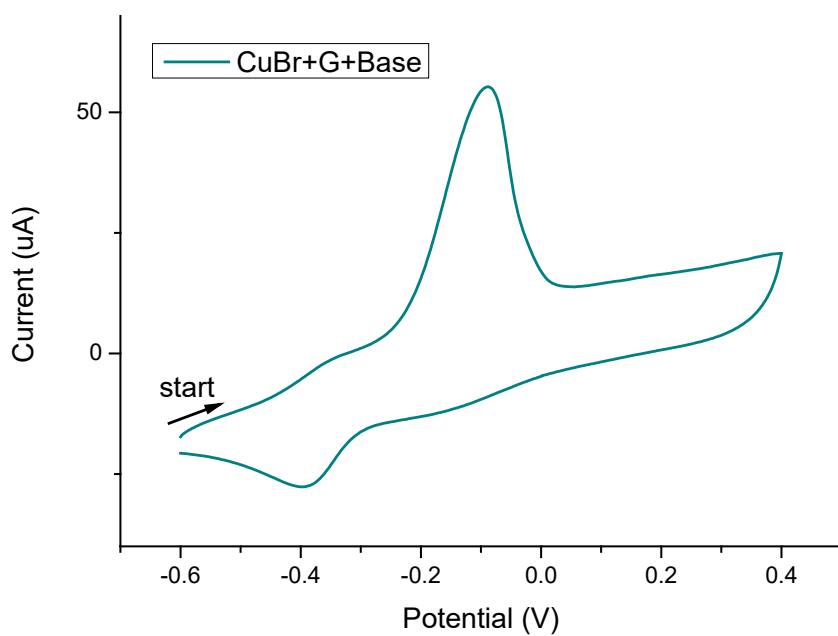

**Figure S18.** CVs of the CuBr/guanidine complex (5 mM), calibrated with Fc as an internal standard.

## 9. Computational details

### 9.1 DFT calculations of guanidine and possible guanidine-metal complex structures.

DFT calculations were conducted to evaluate the coordination of guanidine-CuI complexes, as listed in Scheme S19. Various coordination form and valence states were involved [Cu(I) in **E1-E5**, Cu(II) in **E6**], and the simulated  $^1\text{H}$  NMR of **E1** & **E2** are consistent with the experimental results (see 9.1).

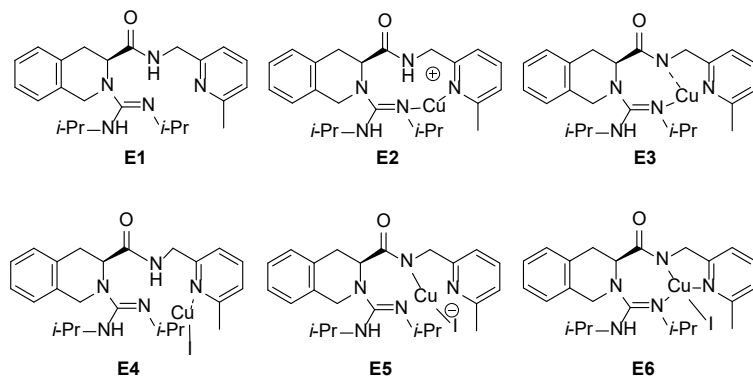

**Scheme S19.** Possible coordination structures of guanidine and CuI.

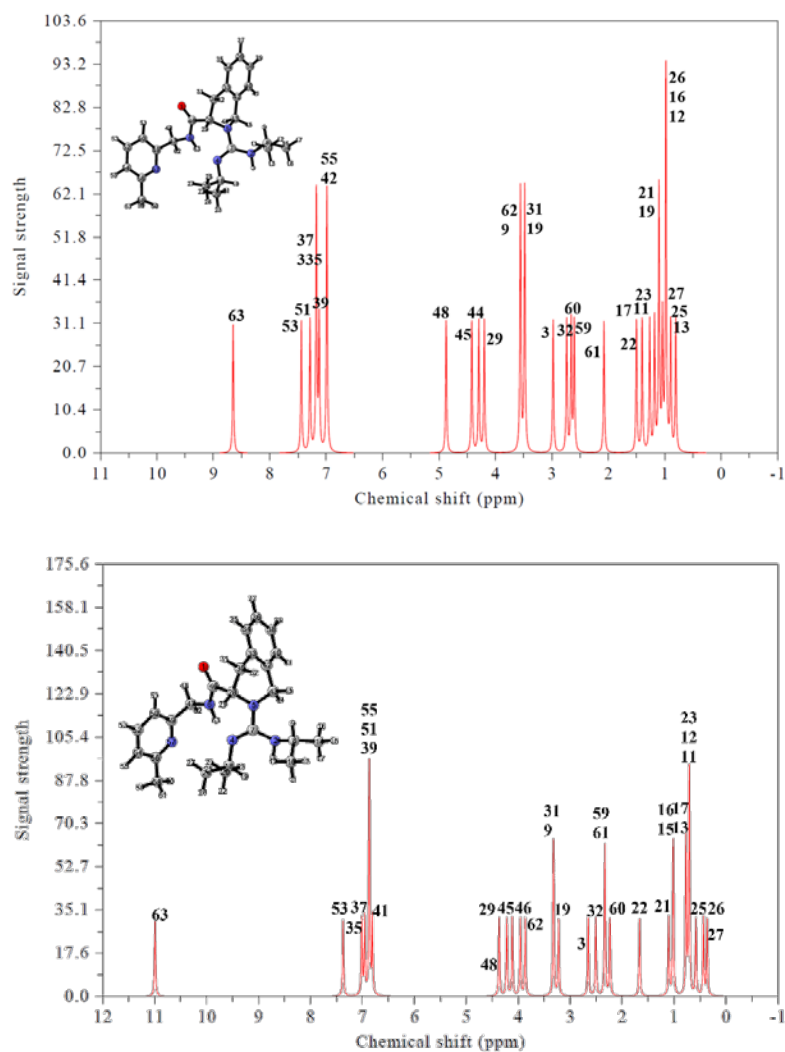

**Figure S20.** Simulated  $^1\text{H}$  NMR of **E1** (up: basic structure, down: Boltzmann-weighted chemical shifts)



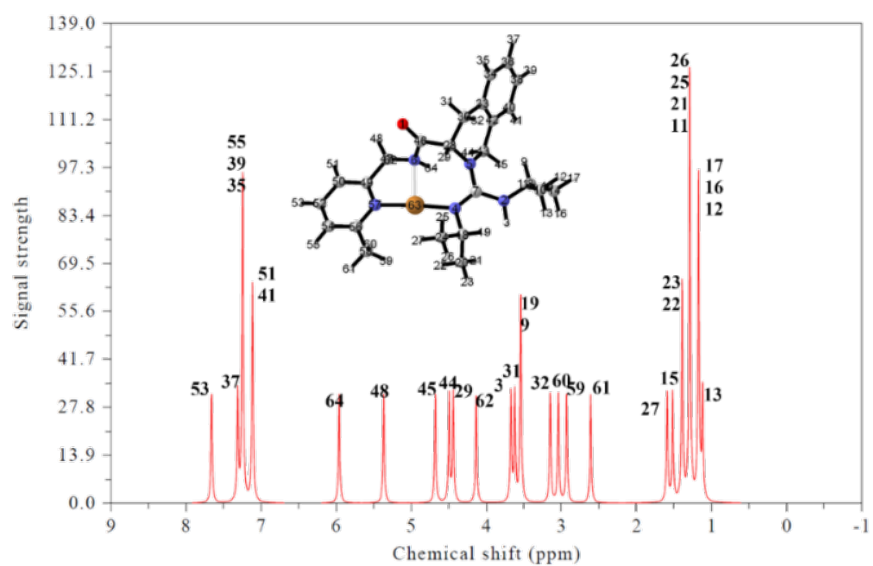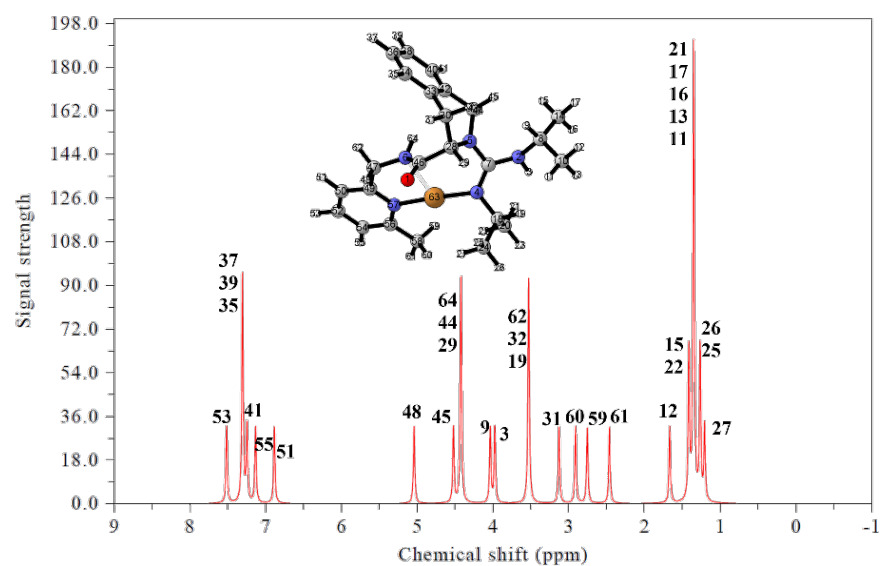

**Figure S21.** Simulated  $^1\text{H}$  NMR of E2. (up: basic structure, down: Boltzmann-weighted chemical shifts)

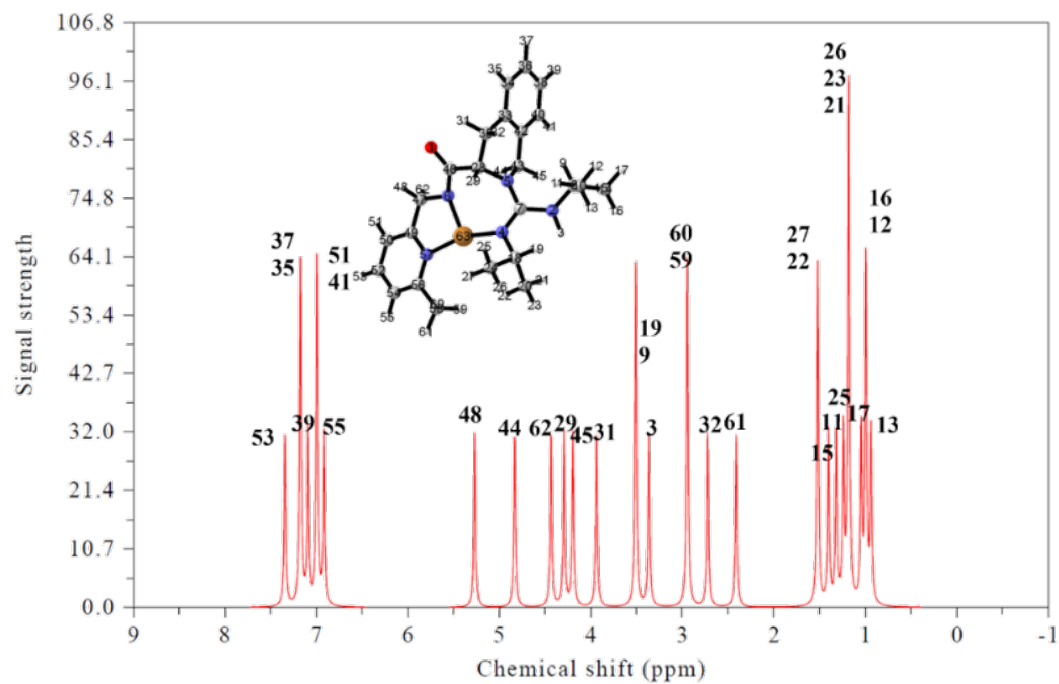

Figure S22. Simulated  $^1\text{H}$  NMR of E3.

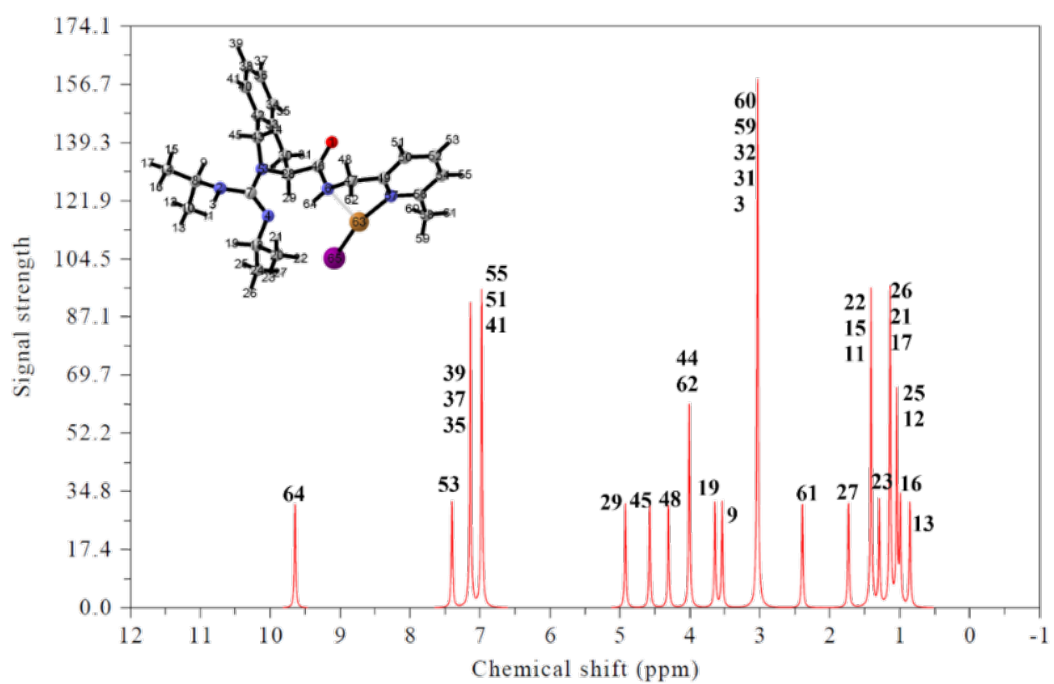

Figure S23. Simulated  $^1\text{H}$  NMR of E4.

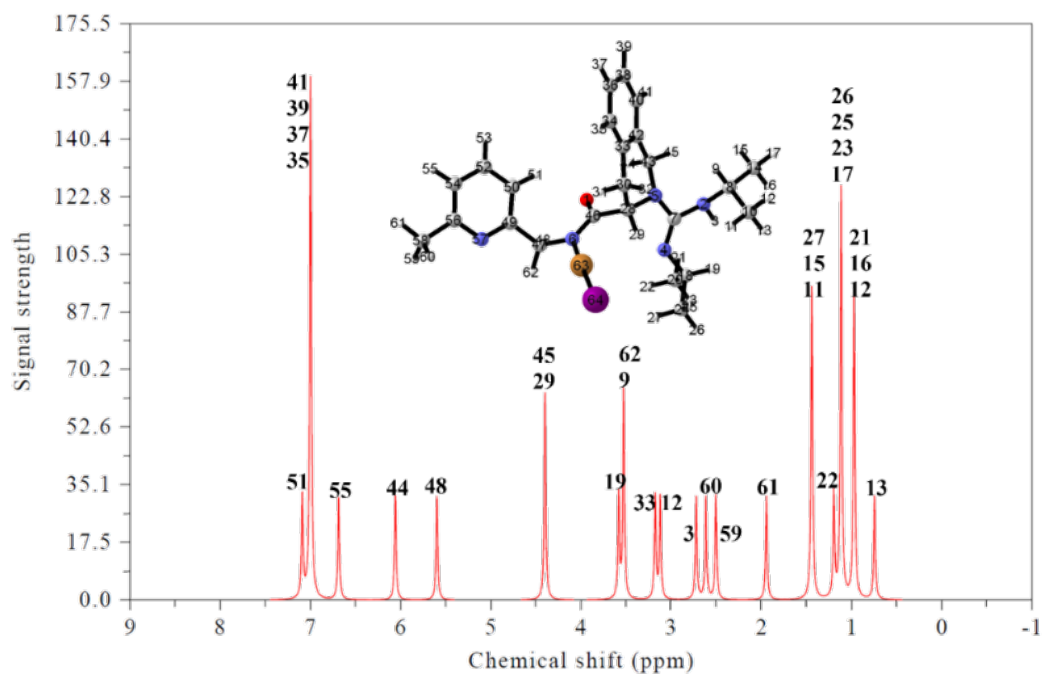

Figure S24. Simulated  $^1\text{H}$  NMR of E5.

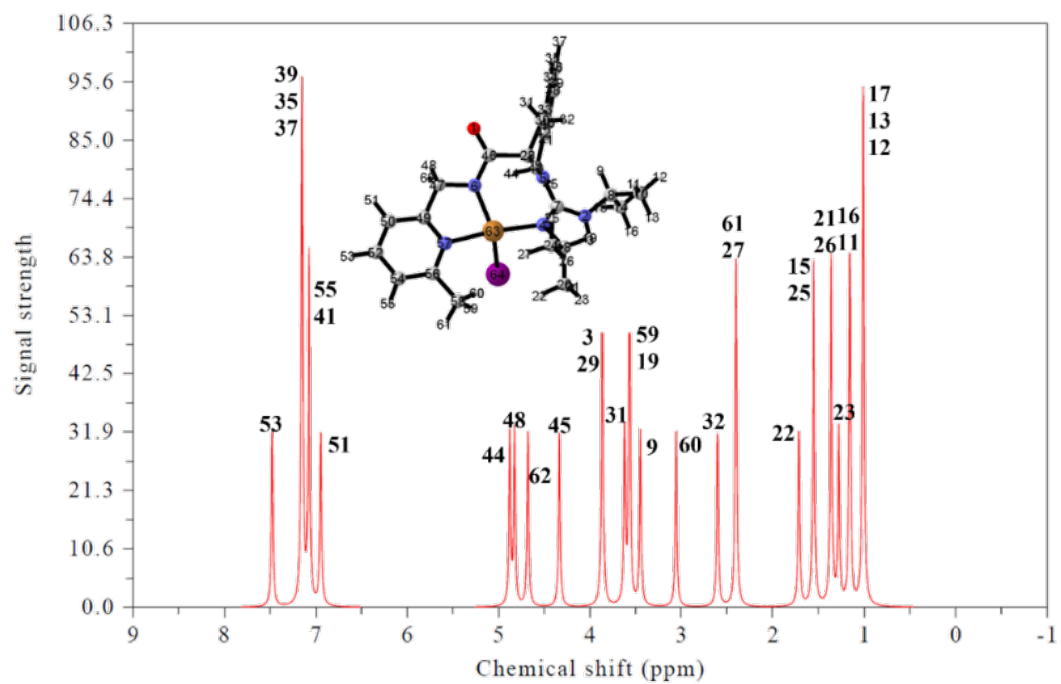

Figure S25. Simulated  $^1\text{H}$  NMR of E6.

**Table S26.** The NMR comparison of simulated structures

|       | E1    | E1'    |       | E2    | E2'   | E3     | E4    | E5    | E6    |
|-------|-------|--------|-------|-------|-------|--------|-------|-------|-------|
| No.   | CS    | CS     | No.   | CS    | CS    | CS     | CS    | CS    | CS    |
| 3(H)  | 2.977 | 2.654  | 3(H)  | 3.671 | 3.974 | 3.364  | 3.032 | 2.720 | 3.864 |
| 9(H)  | 3.557 | 3.322  | 9(H)  | 3.540 | 4.033 | 3.507  | 3.539 | 3.524 | 3.448 |
| 11(H) | 1.266 | 0.710  | 11(H) | 1.289 | 1.349 | 1.316  | 1.410 | 1.438 | 1.157 |
| 12(H) | 0.979 | 0.738  | 12(H) | 1.172 | 1.665 | 0.993  | 1.042 | 0.969 | 1.010 |
| 13(H) | 0.804 | 0.769  | 13(H) | 1.118 | 1.328 | 0.937  | 0.854 | 0.743 | 1.008 |
| 15(H) | 1.401 | 1.016  | 15(H) | 1.517 | 1.413 | 1.400  | 1.404 | 1.426 | 1.552 |
| 16(H) | 0.986 | 1.000  | 16(H) | 1.135 | 1.316 | 0.999  | 0.991 | 0.945 | 1.109 |
| 17(H) | 1.101 | 0.767  | 17(H) | 1.156 | 1.362 | 1.045  | 1.138 | 1.113 | 1.059 |
| 19(H) | 3.482 | 3.224  | 19(H) | 3.587 | 3.526 | 3.503  | 3.641 | 3.579 | 3.566 |
| 21(H) | 1.107 | 1.103  | 21(H) | 1.274 | 1.326 | 1.181  | 1.143 | 0.934 | 1.361 |
| 22(H) | 1.500 | 1.663  | 22(H) | 1.390 | 1.401 | 1.519  | 1.403 | 1.194 | 1.714 |
| 23(H) | 1.180 | 0.757  | 23(H) | 1.378 | 1.301 | 1.173  | 1.292 | 1.063 | 1.277 |
| 25(H) | 0.895 | 0.580  | 25(H) | 1.318 | 1.264 | 1.239  | 1.014 | 1.154 | 1.584 |
| 26(H) | 1.014 | 0.435  | 26(H) | 1.335 | 1.274 | 1.161  | 1.143 | 1.075 | 1.398 |
| 27(H) | 1.040 | 0.364  | 27(H) | 1.590 | 1.205 | 1.526  | 1.732 | 1.440 | 2.402 |
| 29(H) | 4.197 | 4.220  | 29(H) | 4.439 | 4.420 | 4.292  | 4.923 | 4.396 | 3.914 |
| 31(H) | 3.449 | 3.316  | 31(H) | 3.619 | 3.126 | 3.937  | 3.024 | 3.174 | 3.620 |
| 32(H) | 2.737 | 2.508  | 32(H) | 3.147 | 3.497 | 2.722  | 3.061 | 3.119 | 2.603 |
| 35(H) | 7.173 | 7.014  | 35(H) | 7.244 | 7.304 | 7.174  | 7.139 | 6.996 | 7.150 |
| 37(H) | 7.180 | 6.958  | 37(H) | 7.309 | 7.327 | 7.163  | 7.156 | 6.997 | 7.159 |
| 39(H) | 7.123 | 6.868  | 39(H) | 7.290 | 7.264 | 7.092  | 7.098 | 7.041 | 7.116 |
| 41(H) | 6.987 | 6.807  | 41(H) | 7.112 | 7.244 | 6.992  | 6.977 | 6.991 | 7.073 |
| 44(H) | 4.295 | 3.960  | 44(H) | 4.494 | 4.400 | 4.830  | 4.009 | 6.055 | 4.877 |
| 45(H) | 4.419 | 4.115  | 45(H) | 4.678 | 4.520 | 4.195  | 4.575 | 4.415 | 4.334 |
| 48(H) | 4.874 | 4.367  | 48(H) | 5.365 | 5.039 | 5.269  | 4.308 | 5.595 | 4.825 |
| 51(H) | 7.286 | 6.873  | 51(H) | 7.127 | 6.883 | 6.966  | 6.996 | 7.088 | 6.945 |
| 53(H) | 7.341 | 7.372  | 53(H) | 7.657 | 7.513 | 7.344  | 7.404 | 6.992 | 7.476 |
| 55(H) | 6.961 | 6.866  | 55(H) | 7.208 | 7.131 | 6.915  | 7.021 | 6.684 | 7.063 |
| 59(H) | 2.604 | 2.331  | 59(H) | 2.929 | 2.753 | 2.945  | 2.995 | 2.501 | 3.553 |
| 60(H) | 2.658 | 2.235  | 60(H) | 3.039 | 2.908 | 2.908  | 2.995 | 2.613 | 3.058 |
| 61(H) | 2.076 | 2.367  | 61(H) | 2.609 | 2.460 | 2.410  | 2.391 | 1.942 | 2.357 |
| 62(H) | 3.587 | 3.865  | 62(H) | 4.133 | 3.540 | 4.434  | 4.007 | 3.554 | 4.678 |
| 63(H) | 8.649 | 10.992 | 64(H) | 5.958 | 4.388 | 10.992 | 9.645 |       |       |

It was found that protons related to *N*-isopropyl substituents (H 11-13, 15-17) and *para*-proton at pyridine ring (H 53) of the ligand appeared to significant downfield shift upon mixing CuI with the ligand G-TqPy-*o*Me, which E1 and E2 were well consistent with the <sup>1</sup>H NMR experiments. While the Boltzmann-weighted chemical shifts of E1' were inconsistent with the <sup>1</sup>H NMR experiments bearing a wider range of chemical shifts. It reveals the coordination of two sp<sup>2</sup>-N of the ligand to the copper center.

## 9.2 Computational methods

Geometries were fully optimized by using B3LYP density functional, as implemented in Gaussian 09 program package<sup>2</sup>. The aug-cc-pVTZ-PP basis set was used for the I atom and LANL2DZ basis set and pseudopotential for the Cu atom, and the 6-31g(d) for C, H, O and N atom. The scaling method<sup>3</sup> was used to obtain the NMR shifts. Based on the optimized structures, the NMR shift was calculated at the same level using the gauge-invariant atomic orbital (GIAO) method. The SMD solvent model of chloroform was used during the calculation. The Boltzmann-weighted chemical shifts were calculated by using Multiwfn software<sup>4</sup> combined with xtb program<sup>5</sup> to generate the conformers. The cartesian coordinates of lowest free energy structures were given in this study.

## 9.3 Cartesian coordinats

### E1

O 0.305680000 -2.796609000 0.154354000  
N -1.777995000 2.591989000 -0.483276000

|   |              |              |              |
|---|--------------|--------------|--------------|
| H | -1.326516000 | 3.475644000  | -0.690789000 |
| N | 0.395685000  | 1.784402000  | 0.134044000  |
| N | -1.418844000 | 0.338536000  | 0.040274000  |
| N | 1.085461000  | -0.864320000 | -0.793762000 |
| H | 1.117657000  | 0.147701000  | -0.625586000 |
| C | -0.865386000 | 1.614563000  | -0.084542000 |
| C | -3.077192000 | 2.775459000  | 0.199120000  |
| H | -3.519875000 | 1.781448000  | 0.303564000  |
| C | -2.913879000 | 3.378930000  | 1.601850000  |
| H | -2.264889000 | 2.752241000  | 2.222815000  |
| H | -3.884366000 | 3.465260000  | 2.104549000  |
| H | -2.472107000 | 4.382368000  | 1.549025000  |
| C | -3.983264000 | 3.630511000  | -0.690347000 |
| H | -4.112321000 | 3.172233000  | -1.676099000 |
| H | -3.559533000 | 4.633339000  | -0.834964000 |
| H | -4.969975000 | 3.753051000  | -0.231343000 |
| C | 1.014937000  | 3.098501000  | 0.241227000  |
| H | 0.267853000  | 3.891877000  | 0.424473000  |
| C | 1.761383000  | 3.426523000  | -1.062968000 |
| H | 1.075027000  | 3.457332000  | -1.917505000 |
| H | 2.515822000  | 2.657465000  | -1.266271000 |
| H | 2.265878000  | 4.397573000  | -0.992920000 |
| C | 1.977181000  | 3.088836000  | 1.436999000  |
| H | 1.439529000  | 2.868160000  | 2.365443000  |
| H | 2.475152000  | 4.059356000  | 1.548037000  |
| H | 2.742413000  | 2.316979000  | 1.297229000  |
| C | -0.731232000 | -0.690160000 | 0.830642000  |
| H | -0.124382000 | -0.156290000 | 1.568800000  |
| C | -1.782993000 | -1.543510000 | 1.551736000  |
| H | -1.297863000 | -2.445696000 | 1.935021000  |
| H | -2.151202000 | -0.973695000 | 2.415664000  |
| C | -2.958372000 | -1.927783000 | 0.674956000  |
| C | -3.840892000 | -2.936348000 | 1.084518000  |
| H | -3.651849000 | -3.453067000 | 2.023198000  |
| C | -4.943343000 | -3.289463000 | 0.310668000  |
| H | -5.612911000 | -4.077233000 | 0.645838000  |
| C | -5.180770000 | -2.630533000 | -0.898300000 |
| H | -6.039085000 | -2.895898000 | -1.509824000 |
| C | -4.310052000 | -1.627121000 | -1.315265000 |
| H | -4.489423000 | -1.112224000 | -2.257531000 |
| C | -3.201054000 | -1.268471000 | -0.538688000 |
| C | -2.247192000 | -0.204859000 | -1.041534000 |
| H | -1.595897000 | -0.634162000 | -1.822767000 |
| H | -2.794436000 | 0.614402000  | -1.510955000 |
| C | 0.265969000  | -1.574369000 | 0.025584000  |
| C | 2.199557000  | -1.493960000 | -1.493629000 |
| H | 1.907674000  | -2.523841000 | -1.710657000 |
| C | 3.480943000  | -1.458384000 | -0.679669000 |
| C | 3.780460000  | -2.476235000 | 0.235116000  |
| H | 3.093531000  | -3.306990000 | 0.360536000  |
| C | 4.954968000  | -2.374183000 | 0.973996000  |
| H | 5.225952000  | -3.145715000 | 1.690375000  |
| C | 5.782174000  | -1.267938000 | 0.781053000  |
| H | 6.707928000  | -1.160363000 | 1.339159000  |
| C | 5.402659000  | -0.289840000 | -0.144932000 |
| N | 4.269264000  | -0.388961000 | -0.862005000 |
| C | 6.245700000  | 0.936790000  | -0.395677000 |
| H | 6.520293000  | 1.002819000  | -1.454474000 |
| H | 5.681542000  | 1.845463000  | -0.155069000 |
| H | 7.161805000  | 0.929332000  | 0.202781000  |
| H | 2.366281000  | -0.959257000 | -2.432998000 |

## E1'

|   |              |              |              |
|---|--------------|--------------|--------------|
| O | -0.538345000 | -2.807878000 | 0.590005000  |
| N | -1.230892000 | 2.786319000  | -0.470132000 |
| H | -0.531777000 | 3.392559000  | -0.883010000 |
| N | 0.597844000  | 1.439629000  | 0.252870000  |
| N | -1.518420000 | 0.615089000  | 0.339761000  |
| N | 0.591853000  | -1.139776000 | -0.446587000 |
| C | -0.653391000 | 1.635486000  | 0.061674000  |
| C | -2.195183000 | 3.565381000  | 0.297284000  |
| H | -2.760501000 | 2.872604000  | 0.926033000  |
| C | -1.492326000 | 4.572002000  | 1.212743000  |
| H | -0.935951000 | 5.299481000  | 0.623206000  |
| H | -0.799685000 | 4.058013000  | 1.877030000  |
| H | -2.220656000 | 5.105457000  | 1.818308000  |
| C | -3.144097000 | 4.273250000  | -0.666822000 |
| H | -3.898195000 | 4.828115000  | -0.115163000 |
| H | -3.639711000 | 3.549132000  | -1.307774000 |
| H | -2.591470000 | 4.968162000  | -1.295331000 |
| C | 1.624461000  | 2.431606000  | 0.076860000  |
| H | 1.243645000  | 3.461029000  | 0.214370000  |
| C | 2.223657000  | 2.303333000  | -1.328046000 |
| H | 2.651037000  | 1.310458000  | -1.451677000 |
| H | 3.004744000  | 3.046269000  | -1.473030000 |
| H | 1.456726000  | 2.446888000  | -2.087621000 |
| C | 2.699915000  | 2.172981000  | 1.133059000  |
| H | 2.278617000  | 2.264664000  | 2.131537000  |
| H | 3.513791000  | 2.886207000  | 1.027289000  |
| H | 3.089799000  | 1.165463000  | 1.015121000  |
| C | -1.095317000 | -0.509721000 | 1.152651000  |
| H | -0.396430000 | -0.111890000 | 1.900333000  |
| C | -2.326361000 | -1.134748000 | 1.815875000  |
| H | -2.014268000 | -1.929793000 | 2.491237000  |
| H | -2.865617000 | -0.372304000 | 2.385255000  |
| C | -3.178888000 | -1.684986000 | 0.713882000  |
| C | -3.738624000 | -2.950997000 | 0.735542000  |
| H | -3.601881000 | -3.578807000 | 1.602875000  |
| C | -4.456018000 | -3.411573000 | -0.354359000 |
| H | -4.891572000 | -4.399598000 | -0.334209000 |
| C | -4.602648000 | -2.614043000 | -1.476712000 |
| H | -5.151183000 | -2.978583000 | -2.332806000 |
| C | -4.040611000 | -1.349747000 | -1.506020000 |
| H | -4.152366000 | -0.725544000 | -2.381555000 |
| C | -3.330708000 | -0.880999000 | -0.411968000 |
| C | -2.786324000 | 0.517386000  | -0.366638000 |
| H | -2.657825000 | 0.917331000  | -1.377041000 |
| H | -3.548315000 | 1.134216000  | 0.136858000  |
| C | -0.324731000 | -1.625662000 | 0.398134000  |
| C | 1.561599000  | -1.976981000 | -1.120783000 |
| H | 1.232748000  | -3.014367000 | -1.022825000 |
| C | 2.907457000  | -1.768505000 | -0.477601000 |
| C | 3.229705000  | -2.392914000 | 0.721626000  |
| H | 2.534570000  | -3.081468000 | 1.175484000  |
| C | 4.450678000  | -2.101618000 | 1.306941000  |
| H | 4.739002000  | -2.568584000 | 2.238028000  |
| C | 5.295778000  | -1.200960000 | 0.681944000  |
| H | 6.254116000  | -0.947501000 | 1.109728000  |
| C | 4.887389000  | -0.617644000 | -0.514645000 |
| N | 3.718346000  | -0.902832000 | -1.071278000 |
| C | 5.744890000  | 0.382470000  | -1.226314000 |
| H | 6.758028000  | 0.003679000  | -1.344253000 |

|   |             |              |              |
|---|-------------|--------------|--------------|
| H | 5.320928000 | 0.598077000  | -2.202453000 |
| H | 5.792833000 | 1.306254000  | -0.650956000 |
| H | 1.612228000 | -1.692110000 | -2.175151000 |
| H | 0.808419000 | -0.136261000 | -0.340150000 |

**E2**

|   |              |              |              |
|---|--------------|--------------|--------------|
| O | 0.361146000  | -2.603899000 | 1.609357000  |
| N | -1.790945000 | 2.364074000  | -0.705243000 |
| H | -1.378450000 | 3.238706000  | -1.005005000 |
| N | 0.327655000  | 1.770281000  | 0.174212000  |
| N | -1.345865000 | 0.148261000  | -0.098834000 |
| N | 0.785086000  | -1.616362000 | -0.408552000 |
| C | -0.904293000 | 1.458020000  | -0.194888000 |
| C | -3.230987000 | 2.471787000  | -0.355989000 |
| H | -3.555824000 | 1.474102000  | -0.051391000 |
| C | -3.429406000 | 3.430612000  | 0.826272000  |
| H | -2.869213000 | 3.097350000  | 1.706684000  |
| H | -4.488881000 | 3.483441000  | 1.098457000  |
| H | -3.101216000 | 4.445887000  | 0.571272000  |
| C | -4.024242000 | 2.910073000  | -1.590069000 |
| H | -3.899318000 | 2.207909000  | -2.420777000 |
| H | -3.702790000 | 3.901460000  | -1.933145000 |
| H | -5.090386000 | 2.972813000  | -1.351743000 |
| C | 0.651161000  | 3.184882000  | 0.484580000  |
| H | -0.283449000 | 3.719288000  | 0.698645000  |
| C | 1.347900000  | 3.871964000  | -0.699072000 |
| H | 0.732930000  | 3.854986000  | -1.606921000 |
| H | 2.292354000  | 3.368059000  | -0.937172000 |
| H | 1.573095000  | 4.917214000  | -0.461994000 |
| C | 1.502210000  | 3.248734000  | 1.757363000  |
| H | 0.987694000  | 2.770862000  | 2.597227000  |
| H | 1.706639000  | 4.290329000  | 2.027427000  |
| H | 2.464723000  | 2.743990000  | 1.614133000  |
| C | -0.983209000 | -0.679309000 | 1.055127000  |
| H | -0.475047000 | -0.016078000 | 1.762509000  |
| C | -2.235364000 | -1.243127000 | 1.748530000  |
| H | -1.916066000 | -2.043321000 | 2.423357000  |
| H | -2.656918000 | -0.449287000 | 2.379401000  |
| C | -3.298164000 | -1.738684000 | 0.790498000  |
| C | -4.314682000 | -2.587386000 | 1.252545000  |
| H | -4.304973000 | -2.908001000 | 2.291550000  |
| C | -5.326895000 | -3.023051000 | 0.402353000  |
| H | -6.104043000 | -3.682254000 | 0.777657000  |
| C | -5.337282000 | -2.613095000 | -0.934668000 |
| H | -6.124492000 | -2.946218000 | -1.604411000 |
| C | -4.331785000 | -1.773854000 | -1.404760000 |
| H | -4.334130000 | -1.458676000 | -2.446441000 |
| C | -3.312658000 | -1.330786000 | -0.549713000 |
| C | -2.205492000 | -0.468282000 | -1.121285000 |
| H | -1.587823000 | -1.093333000 | -1.791580000 |
| H | -2.609878000 | 0.321010000  | -1.755231000 |
| C | 0.074696000  | -1.764842000 | 0.776168000  |
| C | 1.873534000  | -2.520902000 | -0.727937000 |
| H | 1.776653000  | -3.396973000 | -0.079050000 |
| C | 3.270409000  | -1.932851000 | -0.545619000 |
| C | 4.359630000  | -2.789557000 | -0.713043000 |
| H | 4.186593000  | -3.835783000 | -0.946018000 |
| C | 5.647246000  | -2.288579000 | -0.574365000 |
| H | 6.509708000  | -2.936326000 | -0.698982000 |
| C | 5.811978000  | -0.938866000 | -0.268910000 |
| H | 6.802003000  | -0.512093000 | -0.151766000 |

|    |             |              |              |
|----|-------------|--------------|--------------|
| C  | 4.692280000 | -0.125897000 | -0.106984000 |
| N  | 3.432345000 | -0.624891000 | -0.247461000 |
| C  | 4.839523000 | 1.330357000  | 0.238746000  |
| H  | 4.292510000 | 1.961535000  | -0.470709000 |
| H  | 4.447167000 | 1.533496000  | 1.242378000  |
| H  | 5.889560000 | 1.632923000  | 0.222574000  |
| H  | 1.767966000 | -2.863503000 | -1.763656000 |
| Cu | 1.833529000 | 0.530009000  | 0.003151000  |
| H  | 0.317211000 | -1.146292000 | -1.171659000 |

E2'

|   |              |              |              |
|---|--------------|--------------|--------------|
| O | -0.465078000 | 0.971386000  | 2.824108000  |
| N | 2.526190000  | -2.022018000 | -0.735785000 |
| H | 2.255784000  | -2.922264000 | -1.113883000 |
| N | 0.367547000  | -1.895184000 | 0.218229000  |
| N | 1.700547000  | 0.027195000  | 0.067144000  |
| N | -0.808965000 | 1.357616000  | 0.593004000  |
| C | 1.510756000  | -1.335006000 | -0.130640000 |
| C | 3.970310000  | -1.935424000 | -0.405063000 |
| H | 4.113109000  | -0.986460000 | 0.117016000  |
| C | 4.370788000  | -3.071772000 | 0.546672000  |
| H | 3.789502000  | -3.039305000 | 1.474407000  |
| H | 5.431499000  | -2.992386000 | 0.807127000  |
| H | 4.218683000  | -4.051486000 | 0.076950000  |
| C | 4.800739000  | -1.945873000 | -1.691787000 |
| H | 4.524944000  | -1.119225000 | -2.353495000 |
| H | 4.655147000  | -2.883881000 | -2.241416000 |
| H | 5.866908000  | -1.862058000 | -1.458622000 |
| C | 0.305359000  | -3.363933000 | 0.414112000  |
| H | 1.317385000  | -3.727940000 | 0.637103000  |
| C | -0.209200000 | -4.087136000 | -0.840058000 |
| H | 0.414857000  | -3.894514000 | -1.721454000 |
| H | -1.225802000 | -3.759323000 | -1.083552000 |
| H | -0.233413000 | -5.169656000 | -0.675515000 |
| C | -0.570175000 | -3.670966000 | 1.634043000  |
| H | -0.191121000 | -3.163550000 | 2.526536000  |
| H | -0.589468000 | -4.748480000 | 1.829652000  |
| H | -1.603631000 | -3.339711000 | 1.469566000  |
| C | 1.429502000  | 0.604751000  | 1.398003000  |
| H | 1.660195000  | -0.144483000 | 2.160375000  |
| C | 2.325601000  | 1.848643000  | 1.626207000  |
| H | 2.078289000  | 2.283936000  | 2.598532000  |
| H | 3.371185000  | 1.514091000  | 1.679773000  |
| C | 2.132616000  | 2.834679000  | 0.499800000  |
| C | 1.911992000  | 4.200539000  | 0.687220000  |
| H | 1.905816000  | 4.613112000  | 1.692965000  |
| C | 1.704916000  | 5.035396000  | -0.414473000 |
| H | 1.543979000  | 6.098741000  | -0.263085000 |
| C | 1.697874000  | 4.504301000  | -1.705942000 |
| H | 1.531344000  | 5.152177000  | -2.561392000 |
| C | 1.905317000  | 3.135774000  | -1.899675000 |
| H | 1.905169000  | 2.721912000  | -2.905434000 |
| C | 2.130262000  | 2.301957000  | -0.800851000 |
| C | 2.433510000  | 0.829039000  | -0.944901000 |
| H | 2.150549000  | 0.464013000  | -1.935947000 |
| H | 3.519620000  | 0.687750000  | -0.852512000 |
| C | -0.031404000 | 0.995941000  | 1.685361000  |
| C | -2.126493000 | 1.937032000  | 0.805328000  |
| H | -2.298172000 | 1.914016000  | 1.887959000  |
| C | -3.258646000 | 1.198500000  | 0.109095000  |
| C | -4.454732000 | 1.873580000  | -0.135447000 |



|    |              |              |              |
|----|--------------|--------------|--------------|
| H  | -4.541840000 | 2.924091000  | 0.123465000  |
| C  | -5.519695000 | 1.183051000  | -0.702778000 |
| H  | -6.461779000 | 1.685722000  | -0.899943000 |
| C  | -5.356571000 | -0.164007000 | -1.018021000 |
| H  | -6.165486000 | -0.733066000 | -1.462874000 |
| C  | -4.136046000 | -0.789253000 | -0.764606000 |
| N  | -3.101625000 | -0.106689000 | -0.205728000 |
| C  | -3.919472000 | -2.238274000 | -1.104590000 |
| H  | -3.128355000 | -2.347303000 | -1.856112000 |
| H  | -3.618877000 | -2.806608000 | -0.217007000 |
| H  | -4.831106000 | -2.688991000 | -1.504801000 |
| H  | -2.135204000 | 2.987468000  | 0.494509000  |
| Cu | -1.319690000 | -0.926823000 | 0.087771000  |
| H  | -0.306593000 | 1.624782000  | -0.247227000 |

### E3

|   |              |              |              |
|---|--------------|--------------|--------------|
| O | -0.246781000 | -2.951833000 | 1.495174000  |
| N | -1.678621000 | 2.345599000  | -0.731337000 |
| H | -1.232702000 | 3.217691000  | -0.985153000 |
| N | 0.342909000  | 1.775237000  | 0.378551000  |
| N | -1.336557000 | 0.173141000  | 0.035773000  |
| N | 0.954011000  | -1.533002000 | 0.107850000  |
| C | -0.851524000 | 1.450152000  | -0.079018000 |
| C | -3.133364000 | 2.461396000  | -0.509297000 |
| H | -3.512623000 | 1.448599000  | -0.357582000 |
| C | -3.449309000 | 3.289942000  | 0.745355000  |
| H | -2.980839000 | 2.848913000  | 1.631821000  |
| H | -4.530876000 | 3.333232000  | 0.918621000  |
| H | -3.084358000 | 4.319797000  | 0.640194000  |
| C | -3.785106000 | 3.051943000  | -1.763231000 |
| H | -3.578107000 | 2.434876000  | -2.643476000 |
| H | -3.410938000 | 4.065287000  | -1.961675000 |
| H | -4.870503000 | 3.119992000  | -1.635523000 |
| C | 0.662239000  | 3.183882000  | 0.660223000  |
| H | -0.270897000 | 3.743671000  | 0.826837000  |
| C | 1.418901000  | 3.840763000  | -0.505754000 |
| H | 0.838217000  | 3.822789000  | -1.436343000 |
| H | 2.353856000  | 3.302659000  | -0.696628000 |
| H | 1.661578000  | 4.885185000  | -0.276600000 |
| C | 1.476058000  | 3.263131000  | 1.957481000  |
| H | 0.920162000  | 2.819331000  | 2.789790000  |
| H | 1.708651000  | 4.304758000  | 2.209307000  |
| H | 2.418213000  | 2.712415000  | 1.851545000  |
| C | -1.059168000 | -0.695970000 | 1.190789000  |
| H | -0.589273000 | -0.063651000 | 1.950096000  |
| C | -2.400426000 | -1.210729000 | 1.739803000  |
| H | -2.177108000 | -2.052139000 | 2.401795000  |
| H | -2.868060000 | -0.420294000 | 2.344721000  |
| C | -3.377691000 | -1.651287000 | 0.666569000  |
| C | -4.507463000 | -2.407567000 | 1.009762000  |
| H | -4.654271000 | -2.690815000 | 2.049932000  |
| C | -5.431470000 | -2.806940000 | 0.046898000  |
| H | -6.297413000 | -3.396628000 | 0.336540000  |
| C | -5.237043000 | -2.452429000 | -1.291003000 |
| H | -5.952029000 | -2.757786000 | -2.050487000 |
| C | -4.118602000 | -1.701709000 | -1.645324000 |
| H | -3.959699000 | -1.424964000 | -2.686327000 |
| C | -3.188923000 | -1.296874000 | -0.678559000 |
| C | -1.957298000 | -0.519081000 | -1.095404000 |
| H | -1.206363000 | -1.203785000 | -1.519261000 |
| H | -2.198892000 | 0.211795000  | -1.870039000 |

|           |              |              |              |
|-----------|--------------|--------------|--------------|
| C         | -0.061574000 | -1.867713000 | 0.913563000  |
| C         | 1.971887000  | -2.539950000 | -0.043892000 |
| H         | 2.036913000  | -3.181766000 | 0.851459000  |
| C         | 3.342206000  | -1.943623000 | -0.306768000 |
| C         | 4.418489000  | -2.787086000 | -0.616924000 |
| H         | 4.248655000  | -3.857769000 | -0.683826000 |
| C         | 5.676590000  | -2.243169000 | -0.824558000 |
| H         | 6.524332000  | -2.881072000 | -1.060287000 |
| C         | 5.838623000  | -0.859474000 | -0.723775000 |
| H         | 6.808695000  | -0.398083000 | -0.878906000 |
| C         | 4.734513000  | -0.066016000 | -0.421737000 |
| N         | 3.507504000  | -0.606008000 | -0.218263000 |
| C         | 4.854532000  | 1.430548000  | -0.315088000 |
| H         | 4.273818000  | 1.920760000  | -1.105586000 |
| H         | 4.457964000  | 1.781938000  | 0.643760000  |
| H         | 5.896223000  | 1.753554000  | -0.403220000 |
| H         | 1.751894000  | -3.235553000 | -0.873583000 |
| Cu        | 1.721202000  | 0.362555000  | 0.139587000  |
| <b>E4</b> |              |              |              |
| O         | 0.067499000  | 2.397277000  | 0.301569000  |
| N         | -3.688961000 | -1.449161000 | 1.408613000  |
| H         | -3.700121000 | -2.243323000 | 2.038437000  |
| N         | -1.304434000 | -1.741709000 | 1.308288000  |
| N         | -2.327441000 | 0.101923000  | 0.316263000  |
| N         | 0.650699000  | 0.368605000  | 1.181534000  |
| C         | -2.390581000 | -1.097406000 | 1.032972000  |
| C         | -4.788435000 | -1.517935000 | 0.418878000  |
| H         | -4.749200000 | -0.591238000 | -0.159985000 |
| C         | -4.624357000 | -2.698005000 | -0.549818000 |
| H         | -3.668114000 | -2.638441000 | -1.080343000 |
| H         | -5.426749000 | -2.701678000 | -1.296803000 |
| H         | -4.659749000 | -3.655112000 | -0.013701000 |
| C         | -6.120167000 | -1.575241000 | 1.171989000  |
| H         | -6.234823000 | -0.712202000 | 1.835890000  |
| H         | -6.187349000 | -2.485505000 | 1.782813000  |
| H         | -6.959755000 | -1.587715000 | 0.469000000  |
| C         | -1.291617000 | -3.120068000 | 1.793012000  |
| H         | -2.292682000 | -3.467927000 | 2.101164000  |
| C         | -0.379683000 | -3.207298000 | 3.024823000  |
| H         | -0.727135000 | -2.537754000 | 3.820199000  |
| H         | 0.645860000  | -2.924256000 | 2.758894000  |
| H         | -0.356737000 | -4.229089000 | 3.420500000  |
| C         | -0.807898000 | -4.053018000 | 0.671873000  |
| H         | -1.502132000 | -4.033229000 | -0.175400000 |
| H         | -0.735837000 | -5.086342000 | 1.032565000  |
| H         | 0.173983000  | -3.737416000 | 0.303784000  |
| C         | -1.137683000 | 0.414651000  | -0.488625000 |
| H         | -0.689937000 | -0.537048000 | -0.785404000 |
| C         | -1.563091000 | 1.190960000  | -1.742775000 |
| H         | -0.679151000 | 1.657394000  | -2.191204000 |
| H         | -1.934951000 | 0.459251000  | -2.472264000 |
| C         | -2.635382000 | 2.234461000  | -1.502842000 |
| C         | -2.932805000 | 3.176659000  | -2.496636000 |
| H         | -2.360858000 | 3.166778000  | -3.422171000 |
| C         | -3.939854000 | 4.122032000  | -2.315922000 |
| H         | -4.151870000 | 4.845867000  | -3.098392000 |
| C         | -4.673320000 | 4.135733000  | -1.126564000 |
| H         | -5.464134000 | 4.865826000  | -0.976480000 |
| C         | -4.386732000 | 3.202112000  | -0.133369000 |
| H         | -4.953847000 | 3.208855000  | 0.795838000  |
| C         | -3.374256000 | 2.251165000  | -0.311697000 |

|    |              |              |              |
|----|--------------|--------------|--------------|
| C  | -3.048401000 | 1.284236000  | 0.806030000  |
| H  | -2.440178000 | 1.806257000  | 1.566178000  |
| H  | -3.956257000 | 0.952976000  | 1.311578000  |
| C  | -0.092032000 | 1.184446000  | 0.348397000  |
| C  | 1.390672000  | 0.985862000  | 2.272033000  |
| H  | 0.764613000  | 1.705718000  | 2.813434000  |
| C  | 2.660763000  | 1.697709000  | 1.836304000  |
| C  | 3.114140000  | 2.813043000  | 2.541068000  |
| H  | 2.522890000  | 3.208393000  | 3.360773000  |
| C  | 4.314472000  | 3.406062000  | 2.165673000  |
| H  | 4.688268000  | 4.278095000  | 2.694877000  |
| C  | 5.025926000  | 2.871735000  | 1.093660000  |
| H  | 5.962680000  | 3.313159000  | 0.770120000  |
| C  | 4.521507000  | 1.758474000  | 0.419120000  |
| N  | 3.353061000  | 1.186098000  | 0.800577000  |
| C  | 5.243179000  | 1.152200000  | -0.753660000 |
| H  | 5.441579000  | 0.088271000  | -0.582049000 |
| H  | 4.631590000  | 1.216852000  | -1.661062000 |
| H  | 6.193069000  | 1.662341000  | -0.937675000 |
| H  | 1.661218000  | 0.185222000  | 2.971453000  |
| Cu | 2.567783000  | -0.341759000 | -0.241051000 |
| H  | 0.205275000  | -0.550167000 | 1.349406000  |
| I  | 2.276381000  | -2.171806000 | -1.847481000 |

**E5**

|   |              |              |              |
|---|--------------|--------------|--------------|
| O | -0.338762000 | 1.550943000  | 1.831305000  |
| N | -4.555829000 | -0.083732000 | 0.872624000  |
| H | -5.048118000 | -0.698188000 | 1.512076000  |
| N | -2.580161000 | -1.288631000 | 1.543887000  |
| N | -2.416760000 | 0.569654000  | 0.156317000  |
| N | 1.133488000  | -0.036120000 | 1.030576000  |
| C | -3.162705000 | -0.334567000 | 0.909641000  |
| C | -5.248683000 | -0.016850000 | -0.429465000 |
| H | -4.684742000 | 0.685898000  | -1.048894000 |
| C | -5.278892000 | -1.369964000 | -1.158452000 |
| H | -4.263964000 | -1.757763000 | -1.293533000 |
| H | -5.742109000 | -1.273819000 | -2.148704000 |
| H | -5.854496000 | -2.110691000 | -0.587443000 |
| C | -6.657511000 | 0.542538000  | -0.208304000 |
| H | -6.615384000 | 1.521235000  | 0.281024000  |
| H | -7.250242000 | -0.128799000 | 0.428612000  |
| H | -7.190245000 | 0.649180000  | -1.160412000 |
| C | -3.314471000 | -2.374077000 | 2.164967000  |
| H | -4.323621000 | -2.511642000 | 1.726995000  |
| C | -3.488811000 | -2.093611000 | 3.668878000  |
| H | -4.075363000 | -1.182138000 | 3.837291000  |
| H | -2.507423000 | -1.944368000 | 4.132196000  |
| H | -3.993299000 | -2.928151000 | 4.173272000  |
| C | -2.542129000 | -3.681701000 | 1.937639000  |
| H | -2.425770000 | -3.878304000 | 0.866676000  |
| H | -3.061821000 | -4.533772000 | 2.395359000  |
| H | -1.538687000 | -3.604981000 | 2.370049000  |
| C | -1.010373000 | 0.236651000  | -0.103062000 |
| H | -0.961737000 | -0.848960000 | -0.198872000 |
| C | -0.621773000 | 0.859412000  | -1.461211000 |
| H | 0.462301000  | 0.782306000  | -1.597802000 |
| H | -1.075719000 | 0.248080000  | -2.254447000 |
| C | -1.075249000 | 2.292418000  | -1.637115000 |
| C | -0.497844000 | 3.104924000  | -2.624018000 |
| H | 0.310233000  | 2.699515000  | -3.230072000 |
| C | -0.937697000 | 4.409864000  | -2.836517000 |
| H | -0.473843000 | 5.022853000  | -3.605943000 |

|           |              |              |              |
|-----------|--------------|--------------|--------------|
| C         | -1.974023000 | 4.924894000  | -2.052480000 |
| H         | -2.329001000 | 5.941215000  | -2.208208000 |
| C         | -2.549768000 | 4.127095000  | -1.066000000 |
| H         | -3.351461000 | 4.527067000  | -0.446640000 |
| C         | -2.111840000 | 2.813744000  | -0.848067000 |
| C         | -2.716282000 | 2.005792000  | 0.277591000  |
| H         | -2.310161000 | 2.373493000  | 1.228037000  |
| H         | -3.799574000 | 2.142237000  | 0.293845000  |
| C         | -0.030012000 | 0.638778000  | 1.033462000  |
| C         | 2.075858000  | 0.336177000  | 2.092700000  |
| H         | 1.507354000  | 0.720207000  | 2.951150000  |
| C         | 3.084212000  | 1.389382000  | 1.667576000  |
| C         | 2.652556000  | 2.646081000  | 1.202967000  |
| H         | 1.589430000  | 2.860181000  | 1.172851000  |
| C         | 3.608679000  | 3.575567000  | 0.817341000  |
| H         | 3.308729000  | 4.557503000  | 0.457052000  |
| C         | 4.962939000  | 3.236845000  | 0.900377000  |
| H         | 5.736100000  | 3.940251000  | 0.601226000  |
| C         | 5.307777000  | 1.970713000  | 1.376943000  |
| N         | 4.383216000  | 1.068893000  | 1.755485000  |
| C         | 6.748459000  | 1.528120000  | 1.487537000  |
| H         | 6.970177000  | 1.192916000  | 2.507509000  |
| H         | 6.938922000  | 0.676094000  | 0.823925000  |
| H         | 7.442404000  | 2.334072000  | 1.224556000  |
| H         | 2.638778000  | -0.546999000 | 2.407571000  |
| Cu        | 1.638795000  | -1.440153000 | -0.178823000 |
| I         | 2.227834000  | -3.241295000 | -1.759711000 |
| <b>E6</b> |              |              |              |
| O         | 1.054249000  | 3.433306000  | 0.914964000  |
| N         | 1.820056000  | -2.340561000 | 0.261232000  |
| H         | 1.241319000  | -3.168147000 | 0.195233000  |
| N         | -0.022246000 | -1.205092000 | 1.206346000  |
| N         | 1.769368000  | -0.001304000 | 0.353603000  |
| N         | -0.513614000 | 1.843970000  | 0.394968000  |
| C         | 1.160703000  | -1.199796000 | 0.620770000  |
| C         | 3.274405000  | -2.570295000 | 0.256337000  |
| H         | 3.745979000  | -1.585128000 | 0.235743000  |
| C         | 3.713432000  | -3.295279000 | 1.538002000  |
| H         | 3.439629000  | -2.717991000 | 2.427563000  |
| H         | 4.799637000  | -3.440822000 | 1.545230000  |
| H         | 3.242020000  | -4.283462000 | 1.611521000  |
| C         | 3.674844000  | -3.348039000 | -1.002488000 |
| H         | 3.377786000  | -2.815140000 | -1.911085000 |
| H         | 3.198381000  | -4.336605000 | -1.020060000 |
| H         | 4.758923000  | -3.500805000 | -1.028635000 |
| C         | -0.424060000 | -2.340741000 | 2.060579000  |
| H         | 0.498091000  | -2.831560000 | 2.407160000  |
| C         | -1.287867000 | -3.406493000 | 1.367983000  |
| H         | -0.803718000 | -3.831918000 | 0.482542000  |
| H         | -2.241294000 | -2.990323000 | 1.030892000  |
| H         | -1.495372000 | -4.223516000 | 2.069749000  |
| C         | -1.143819000 | -1.781819000 | 3.295890000  |
| H         | -0.509106000 | -1.065734000 | 3.828149000  |
| H         | -1.414754000 | -2.588548000 | 3.986812000  |
| H         | -2.064483000 | -1.262083000 | 3.003387000  |
| C         | 1.653024000  | 1.121303000  | 1.292690000  |
| H         | 1.217916000  | 0.708785000  | 2.207087000  |
| C         | 3.063930000  | 1.648614000  | 1.601864000  |
| H         | 2.966206000  | 2.633797000  | 2.065403000  |
| H         | 3.527394000  | 0.979012000  | 2.340408000  |
| C         | 3.970210000  | 1.743920000  | 0.388881000  |

|    |              |              |              |
|----|--------------|--------------|--------------|
| C  | 5.165582000  | 2.472637000  | 0.464003000  |
| H  | 5.411001000  | 2.987571000  | 1.390427000  |
| C  | 6.032495000  | 2.553151000  | -0.622976000 |
| H  | 6.951859000  | 3.127170000  | -0.542898000 |
| C  | 5.712586000  | 1.898798000  | -1.815893000 |
| H  | 6.382079000  | 1.954376000  | -2.670011000 |
| C  | 4.527461000  | 1.172599000  | -1.903697000 |
| H  | 4.270438000  | 0.664995000  | -2.831674000 |
| C  | 3.655093000  | 1.087488000  | -0.810792000 |
| C  | 2.350856000  | 0.328560000  | -0.948139000 |
| H  | 1.620604000  | 0.934546000  | -1.507720000 |
| H  | 2.485401000  | -0.592786000 | -1.518376000 |
| C  | 0.696571000  | 2.249446000  | 0.830960000  |
| C  | -1.429892000 | 2.928898000  | 0.099013000  |
| H  | -1.330558000 | 3.742626000  | 0.833126000  |
| C  | -2.864954000 | 2.469582000  | 0.071579000  |
| C  | -3.898333000 | 3.383205000  | -0.163322000 |
| H  | -3.656982000 | 4.423151000  | -0.360923000 |
| C  | -5.212114000 | 2.939033000  | -0.126279000 |
| H  | -6.033645000 | 3.627535000  | -0.303990000 |
| C  | -5.465695000 | 1.597361000  | 0.162164000  |
| H  | -6.482193000 | 1.223070000  | 0.223457000  |
| C  | -4.400742000 | 0.724604000  | 0.378797000  |
| N  | -3.120208000 | 1.167848000  | 0.308773000  |
| C  | -4.635280000 | -0.721834000 | 0.714067000  |
| H  | -4.244626000 | -1.368498000 | -0.079135000 |
| H  | -4.120988000 | -0.992010000 | 1.643919000  |
| H  | -5.702710000 | -0.922555000 | 0.841483000  |
| H  | -1.186419000 | 3.391098000  | -0.872233000 |
| Cu | -1.352334000 | 0.048520000  | 0.283564000  |
| I  | -1.847702000 | -1.451643000 | -1.876227000 |

## 10. Copies of NMR spectra for the ligands and the products

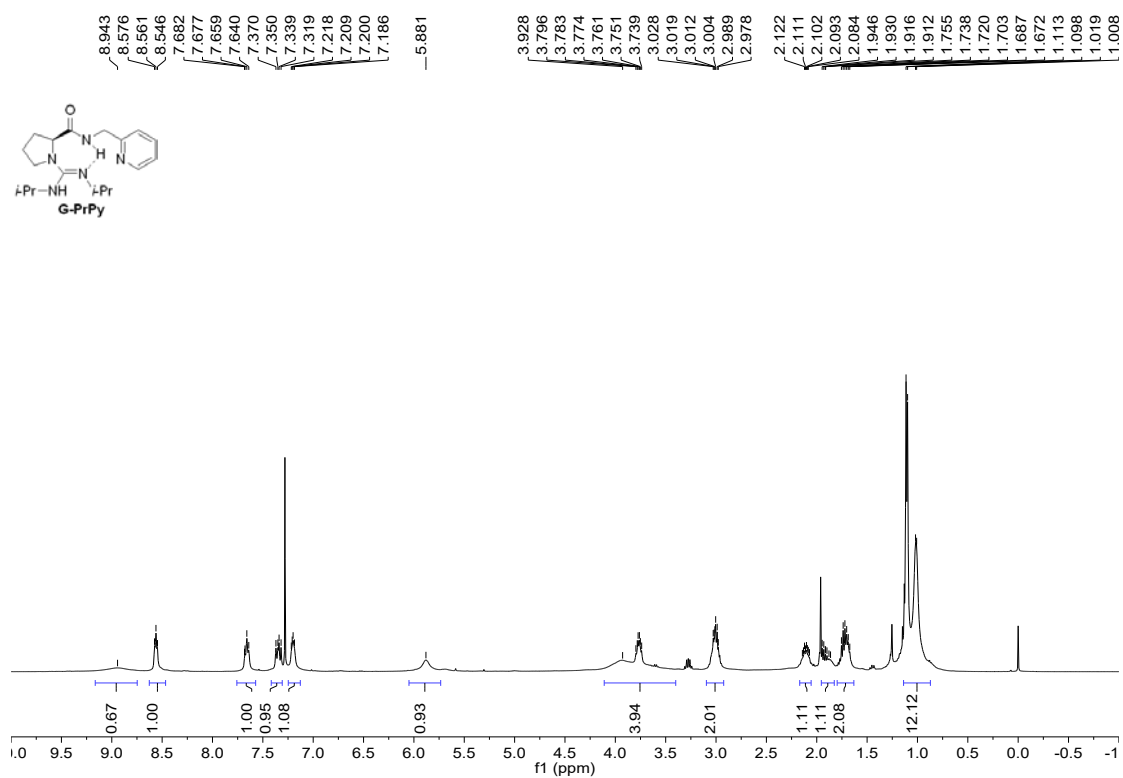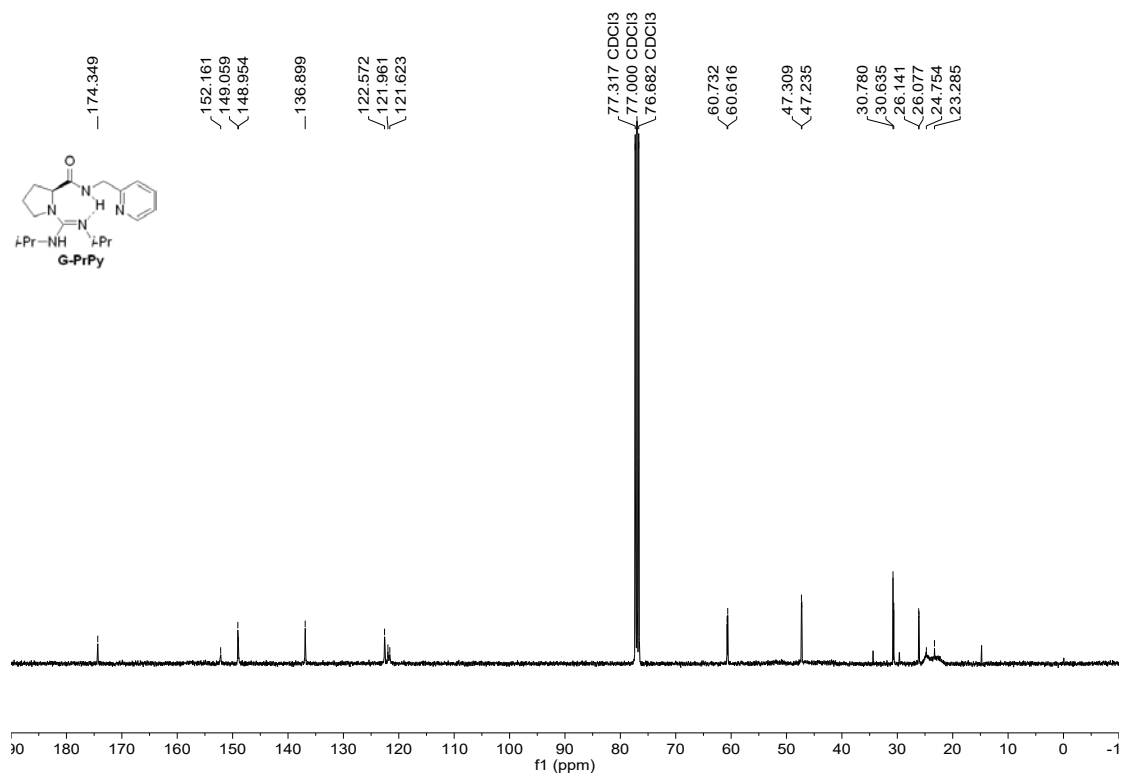

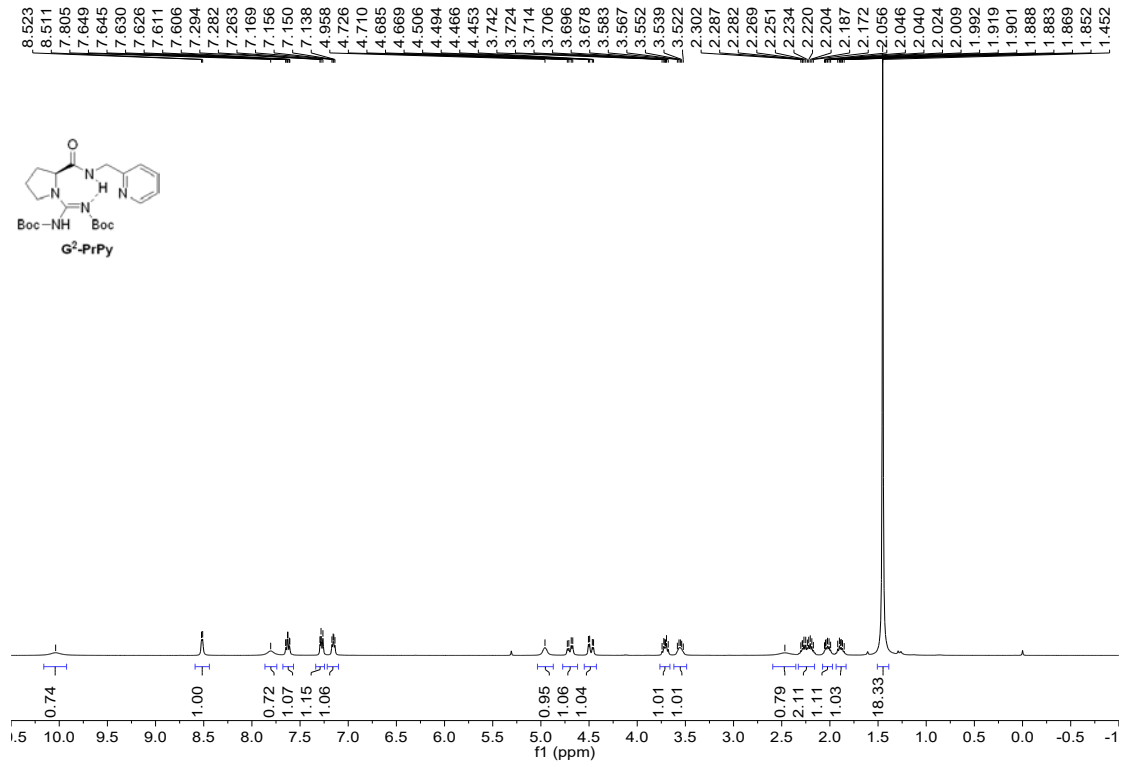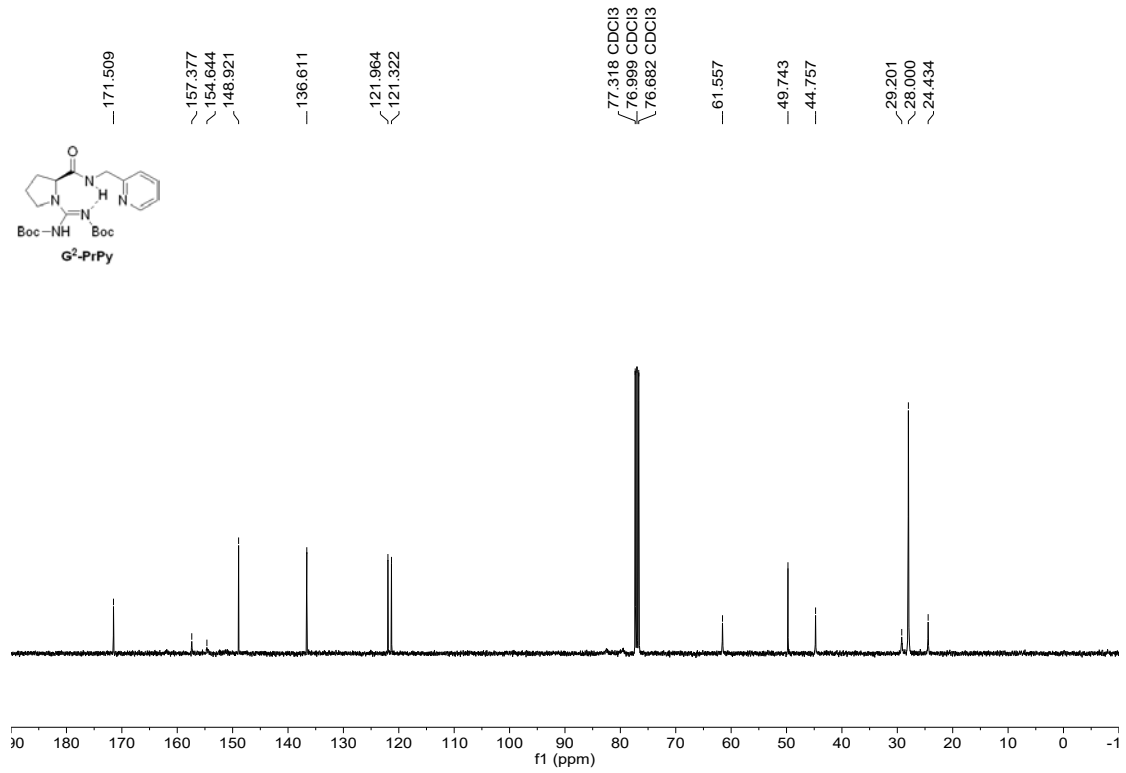

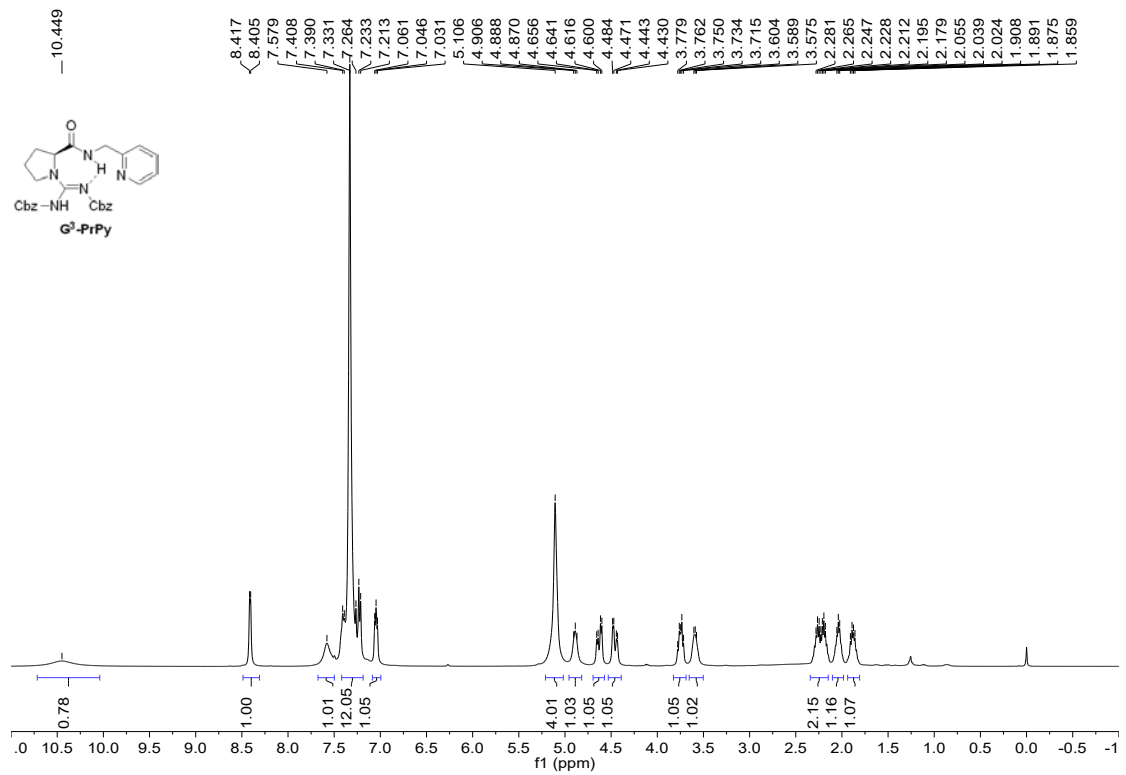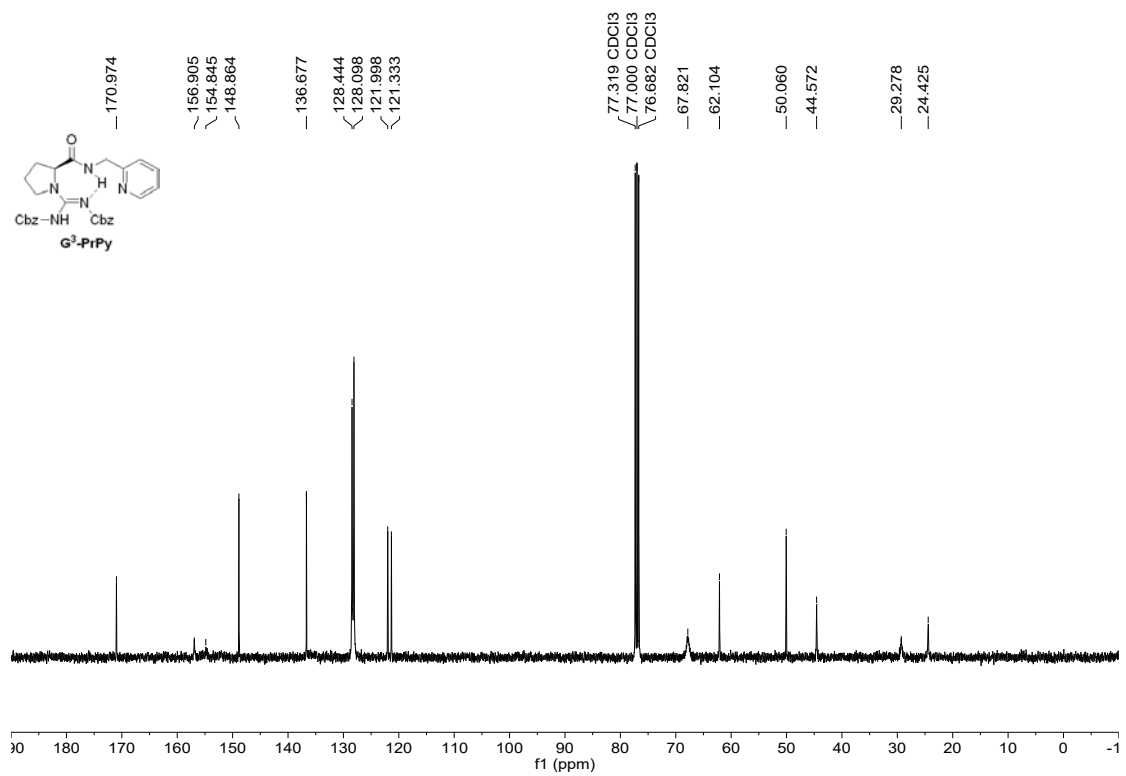



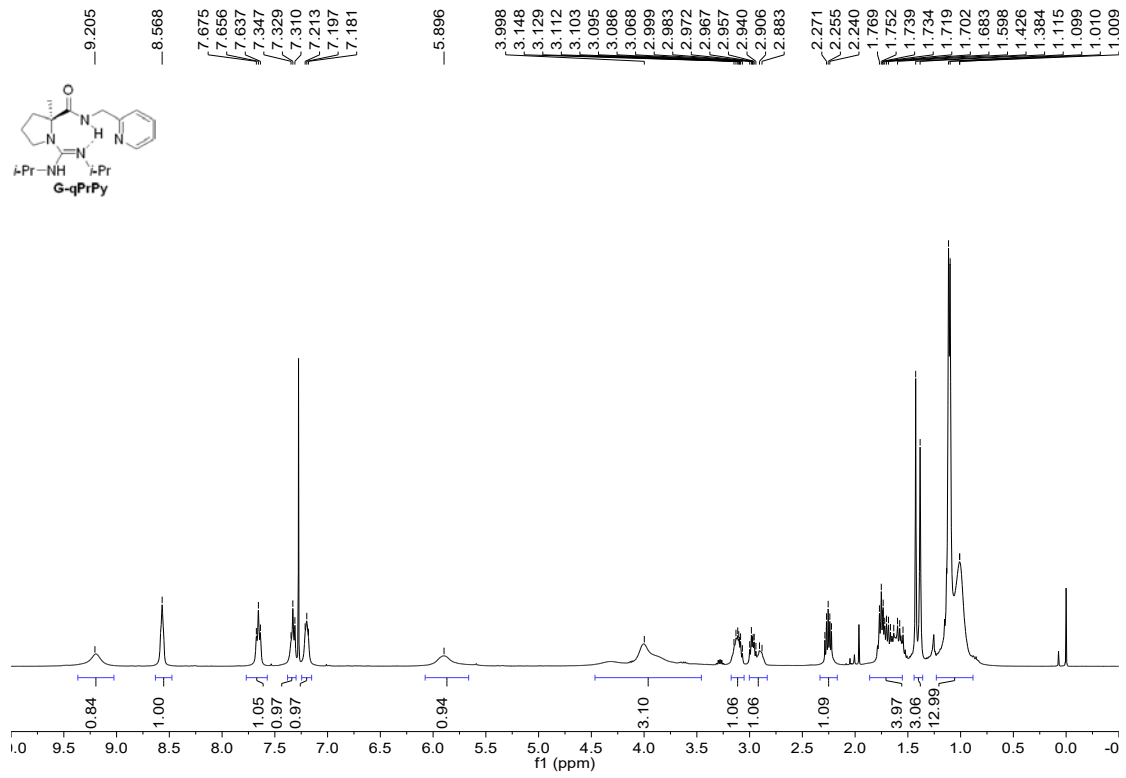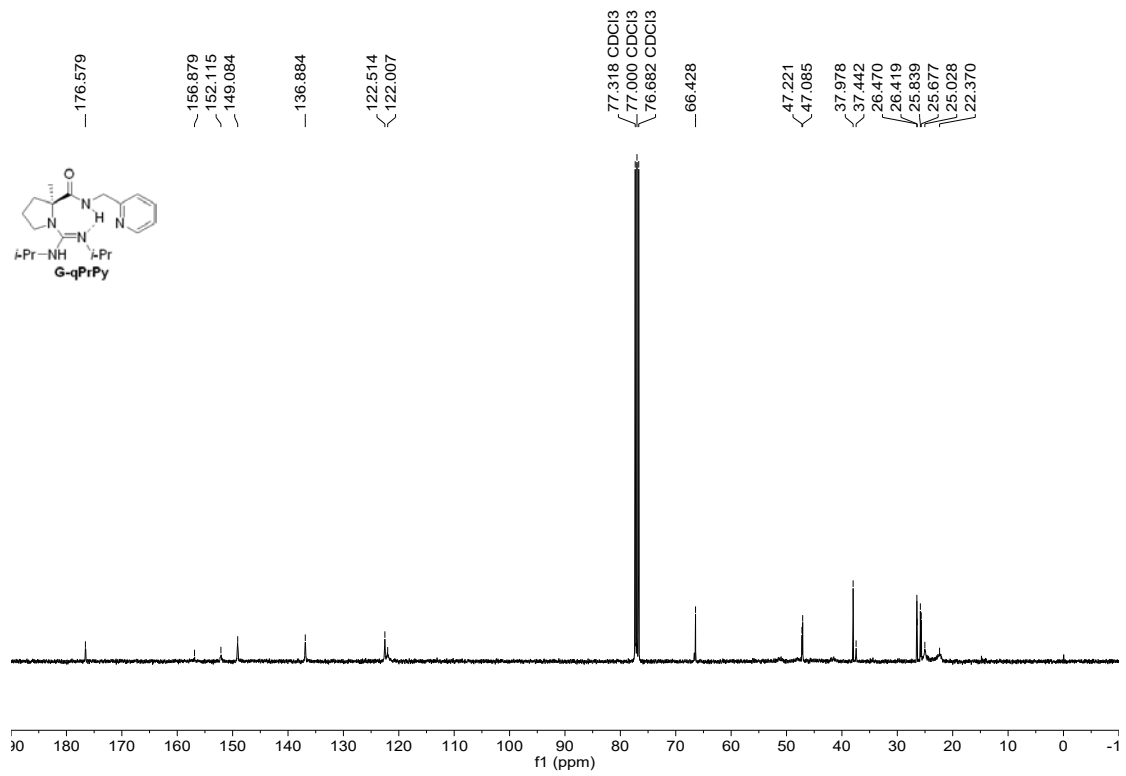

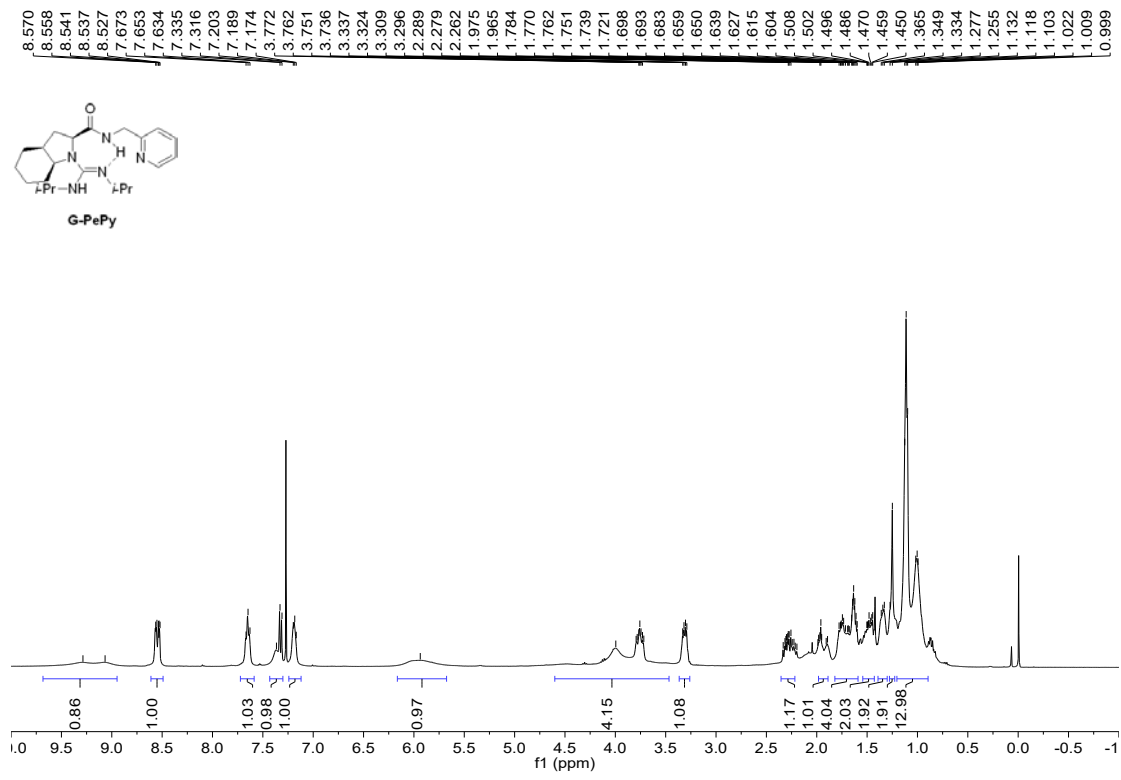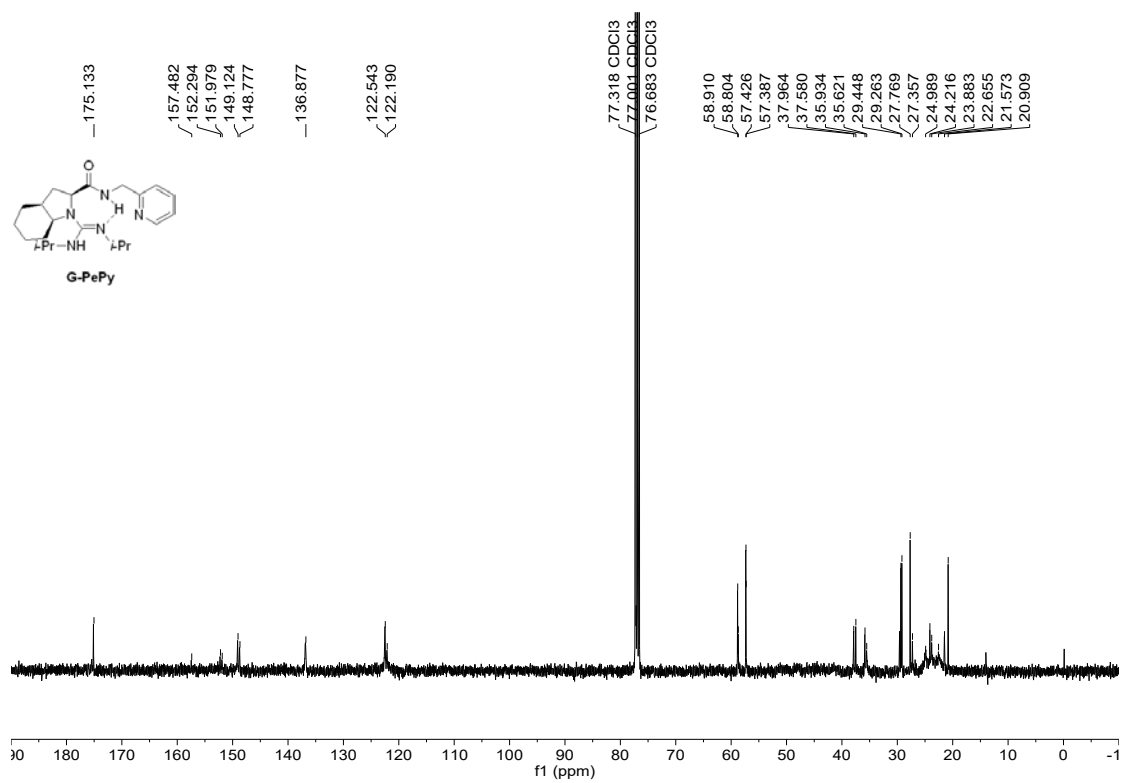

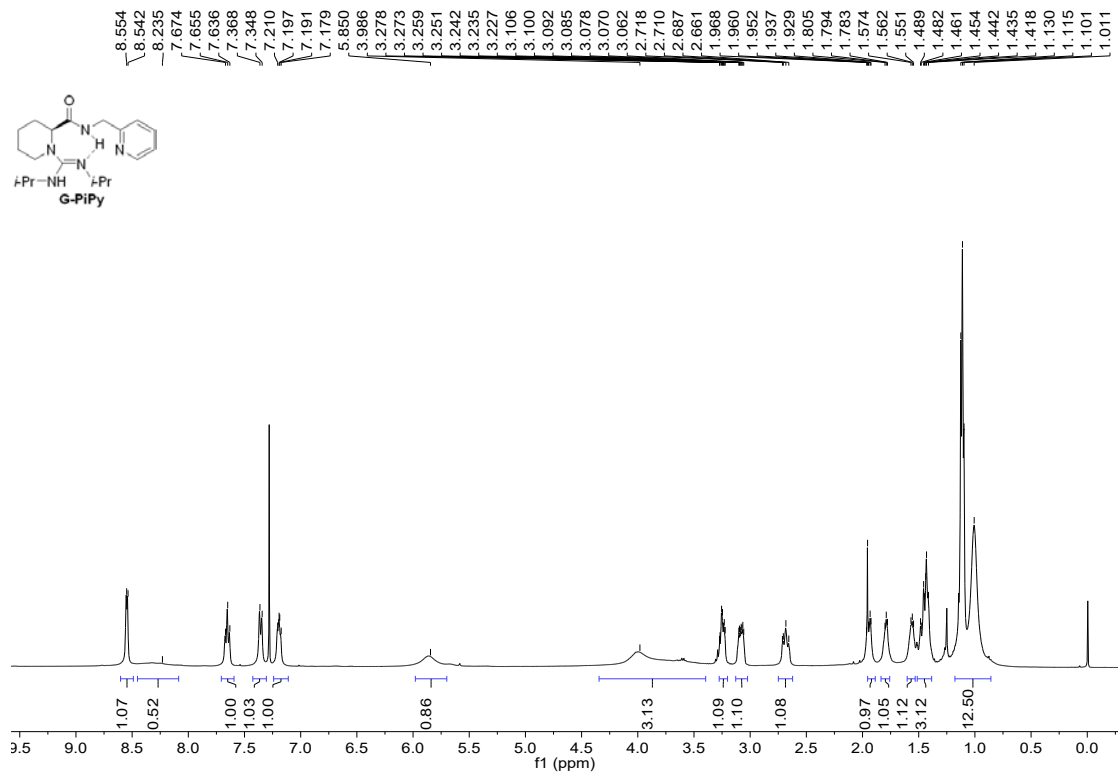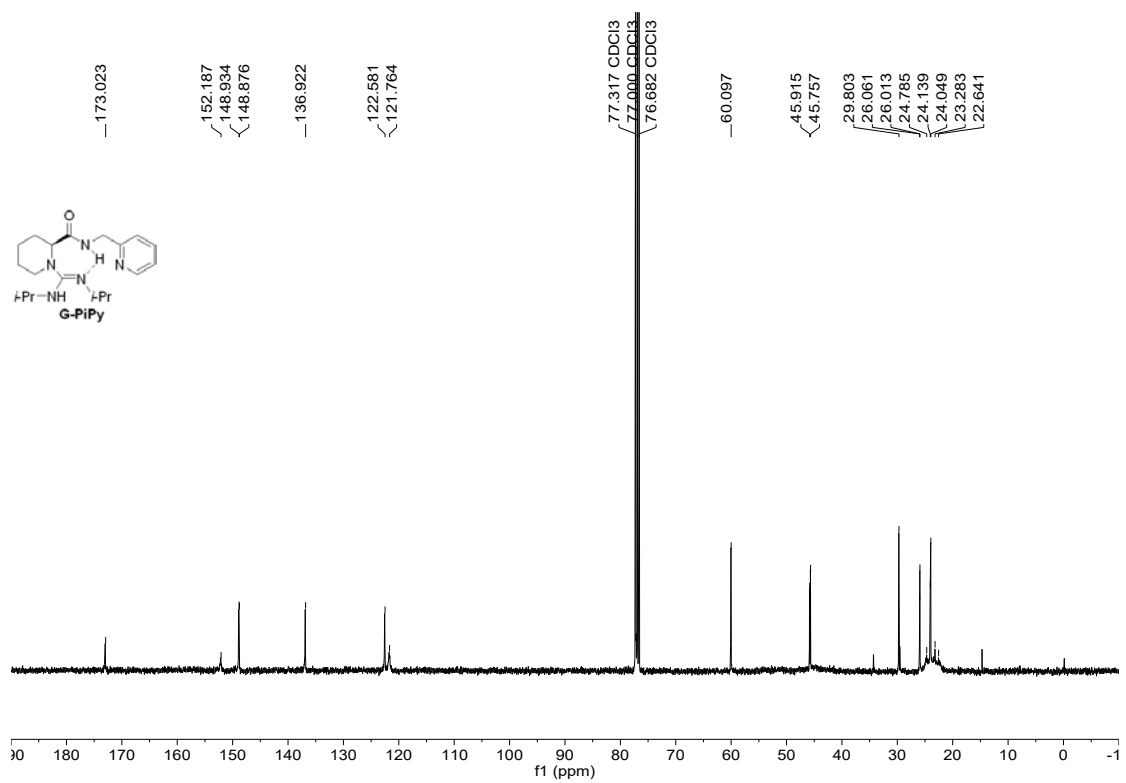

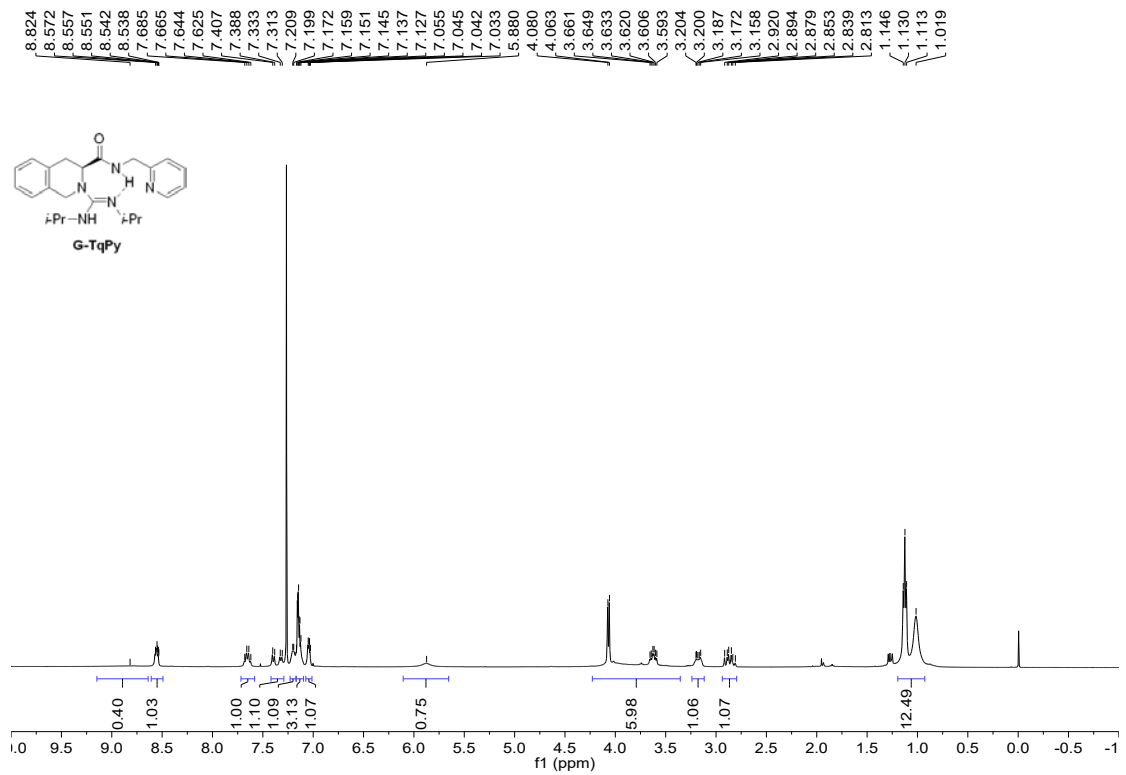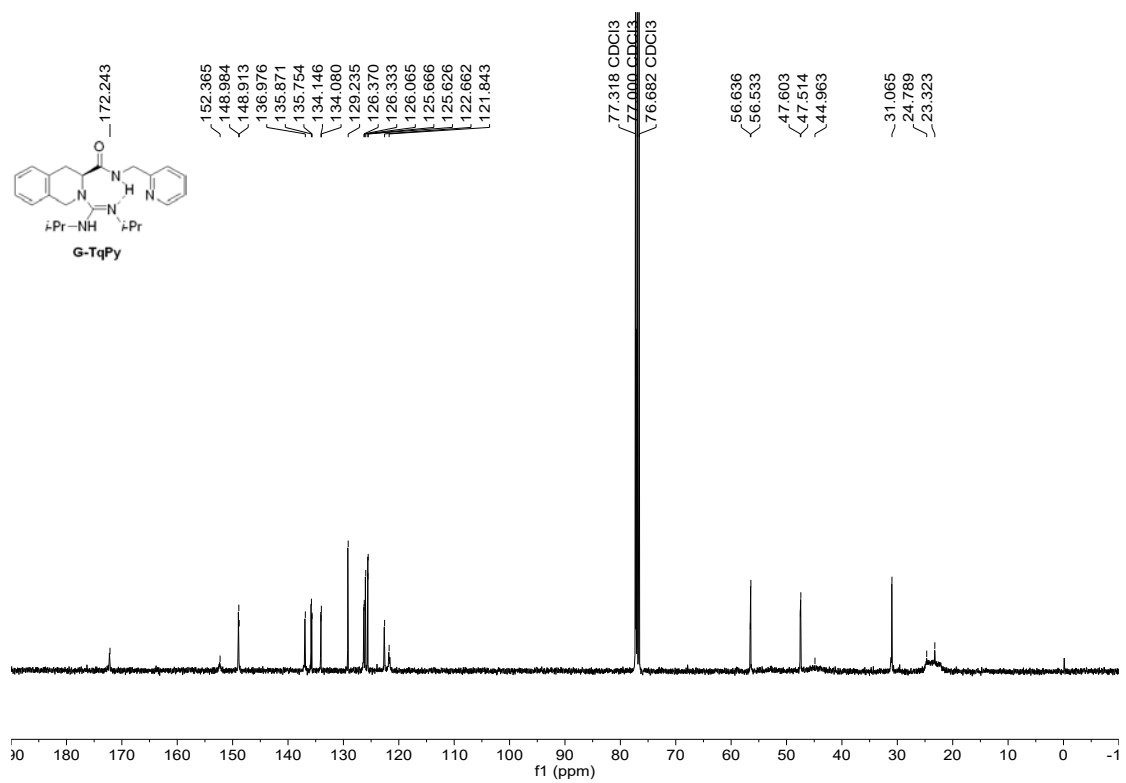

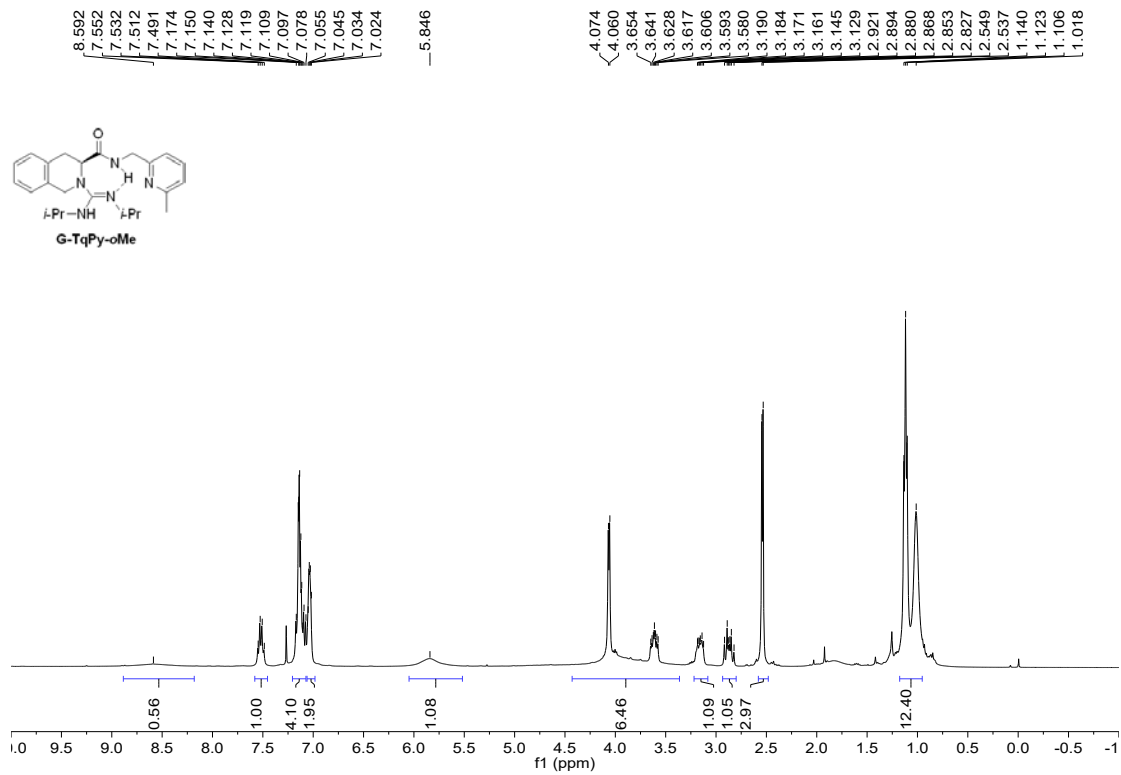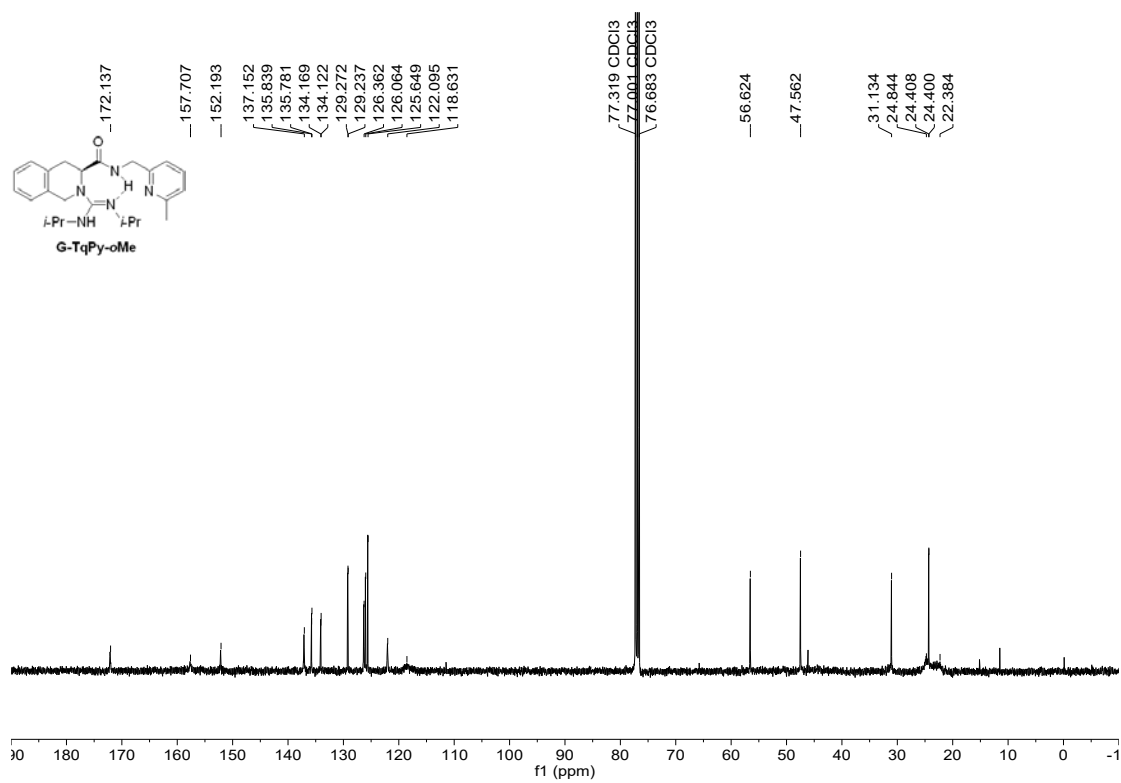

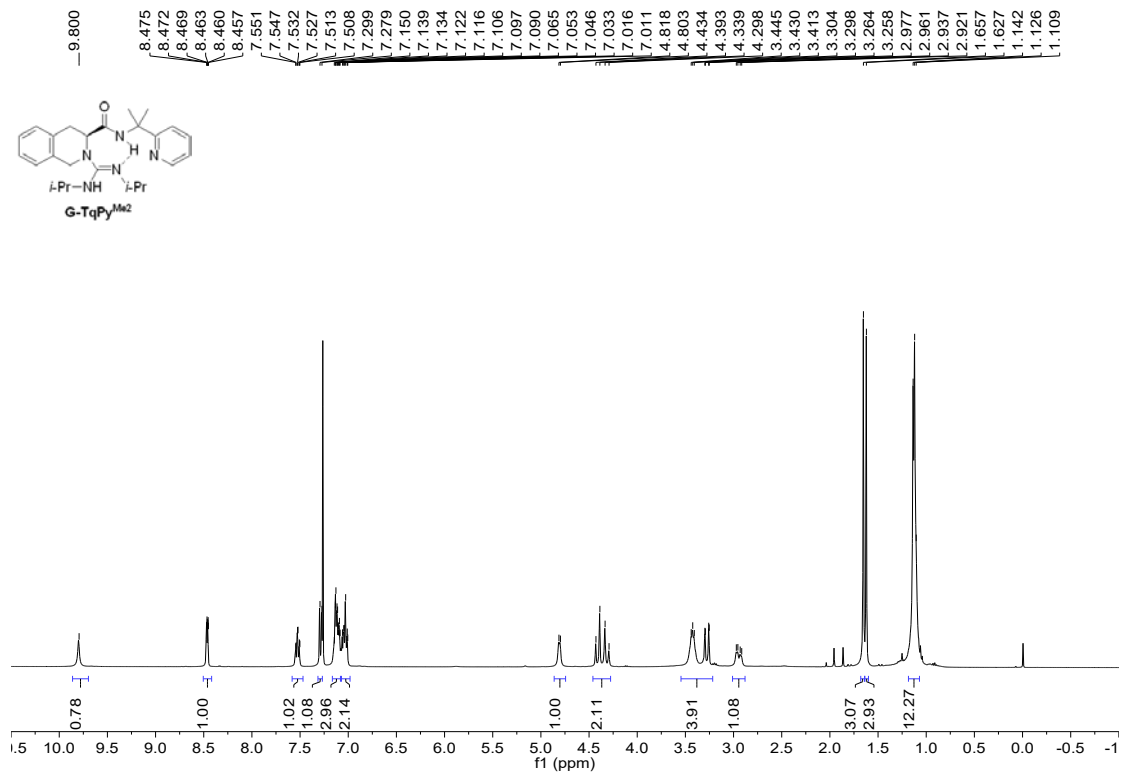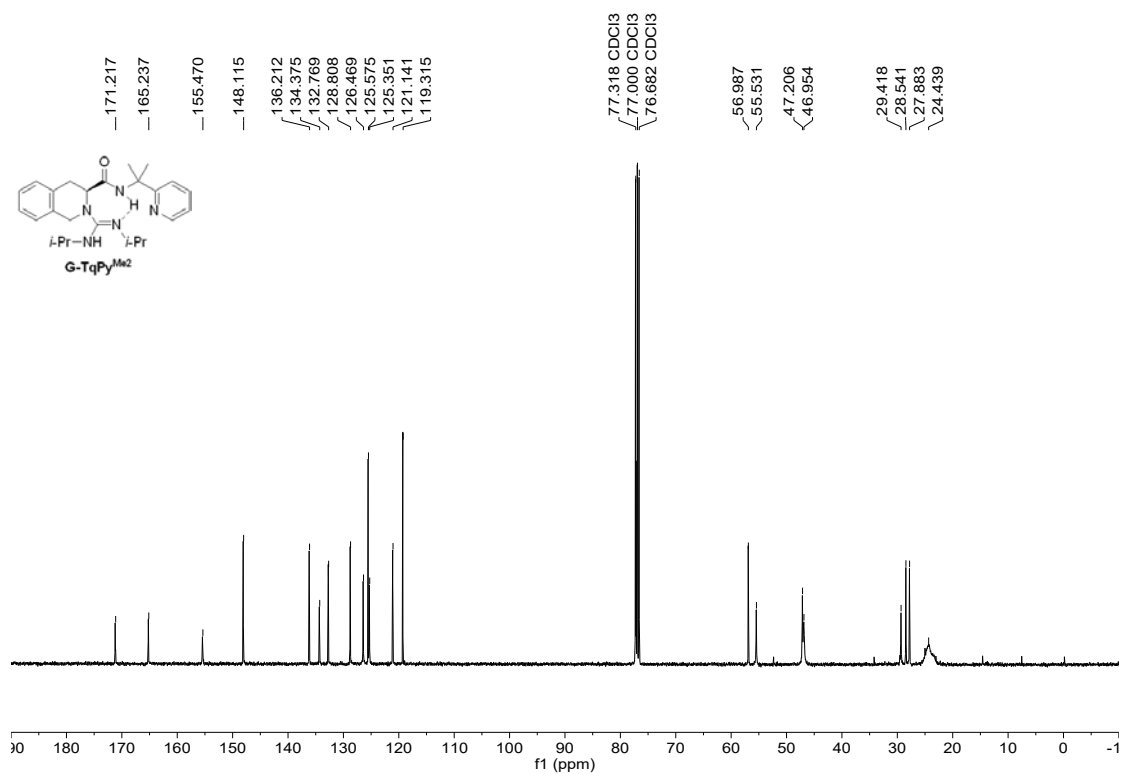

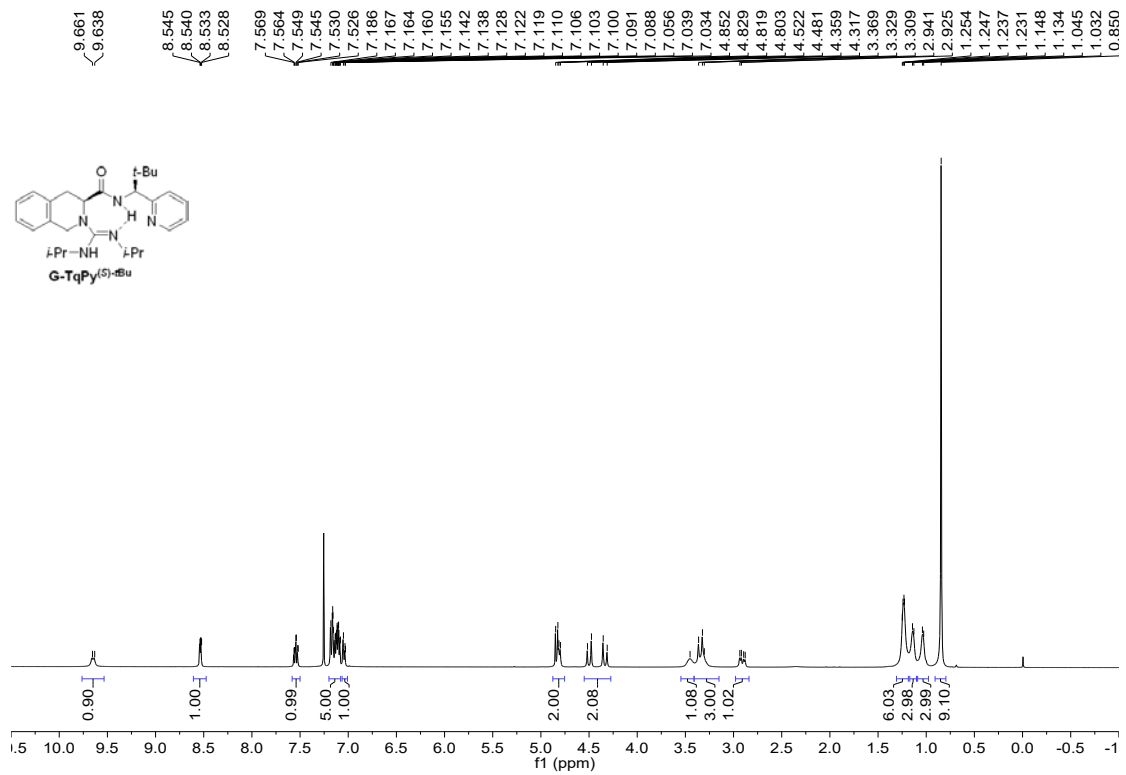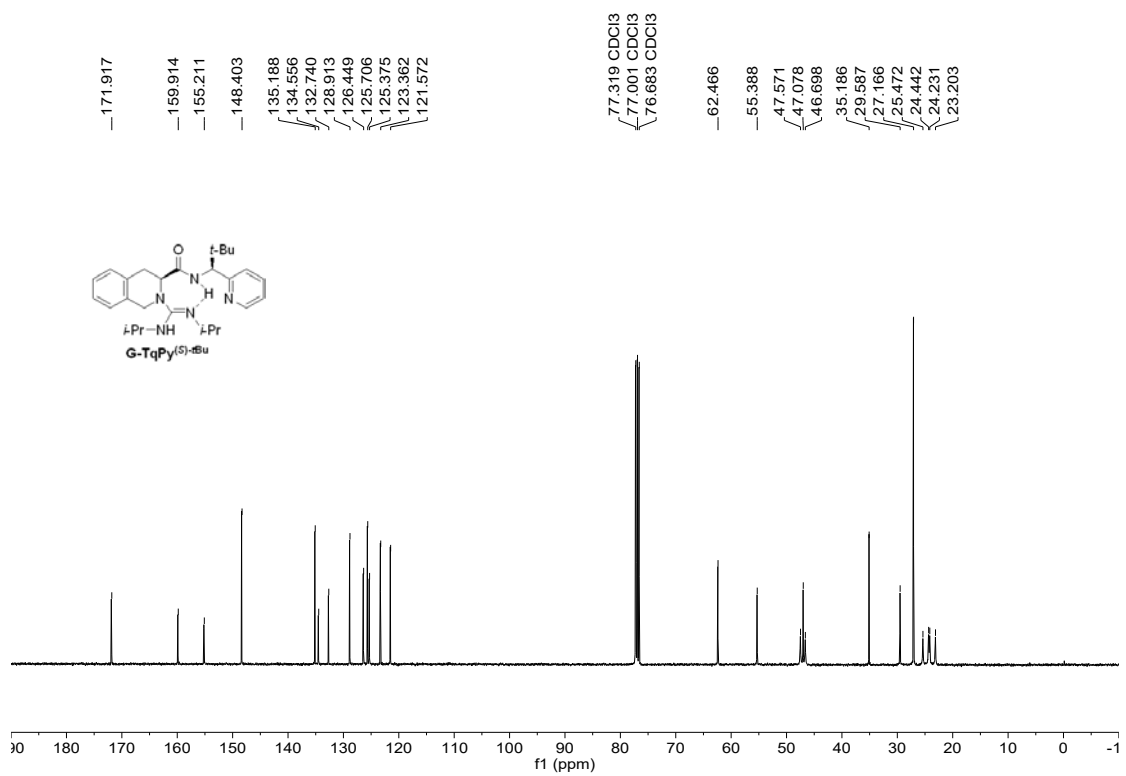

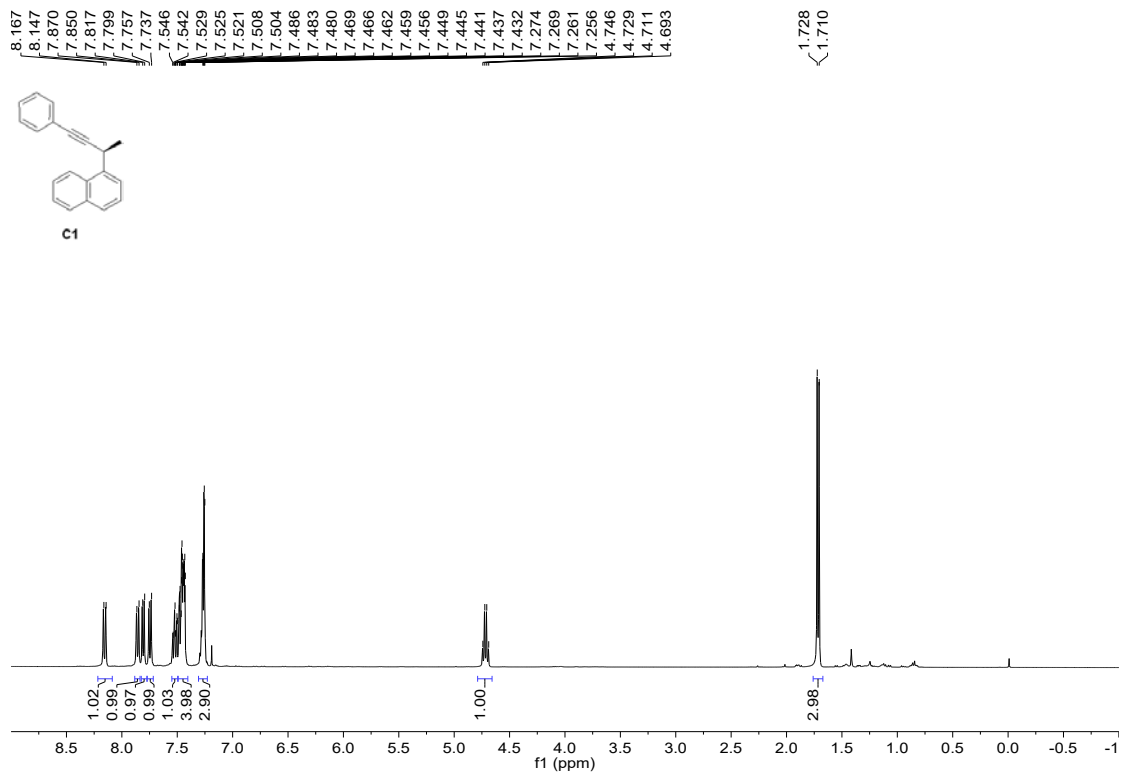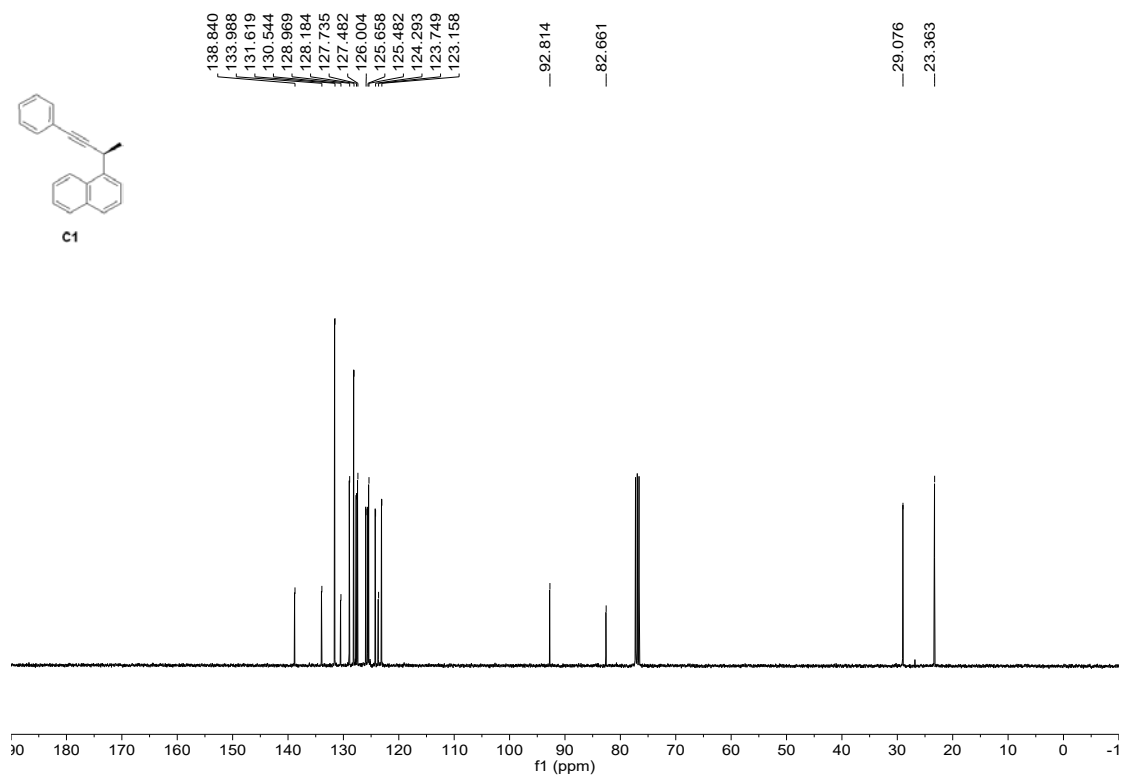



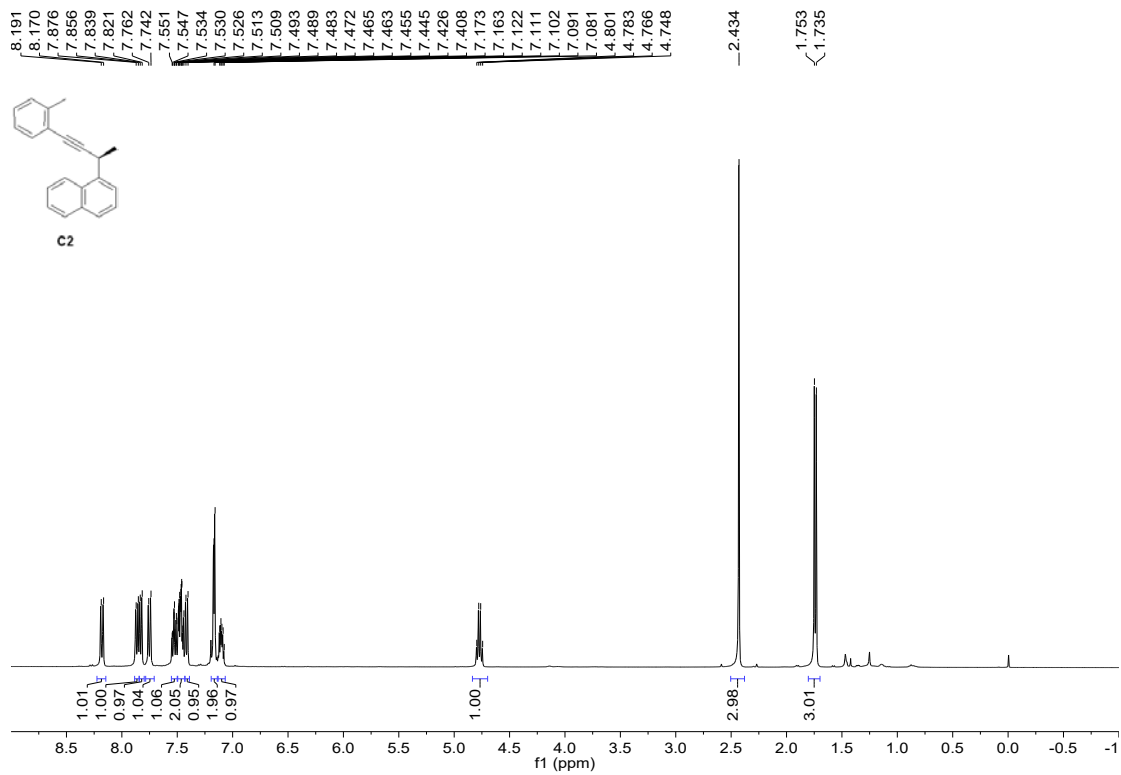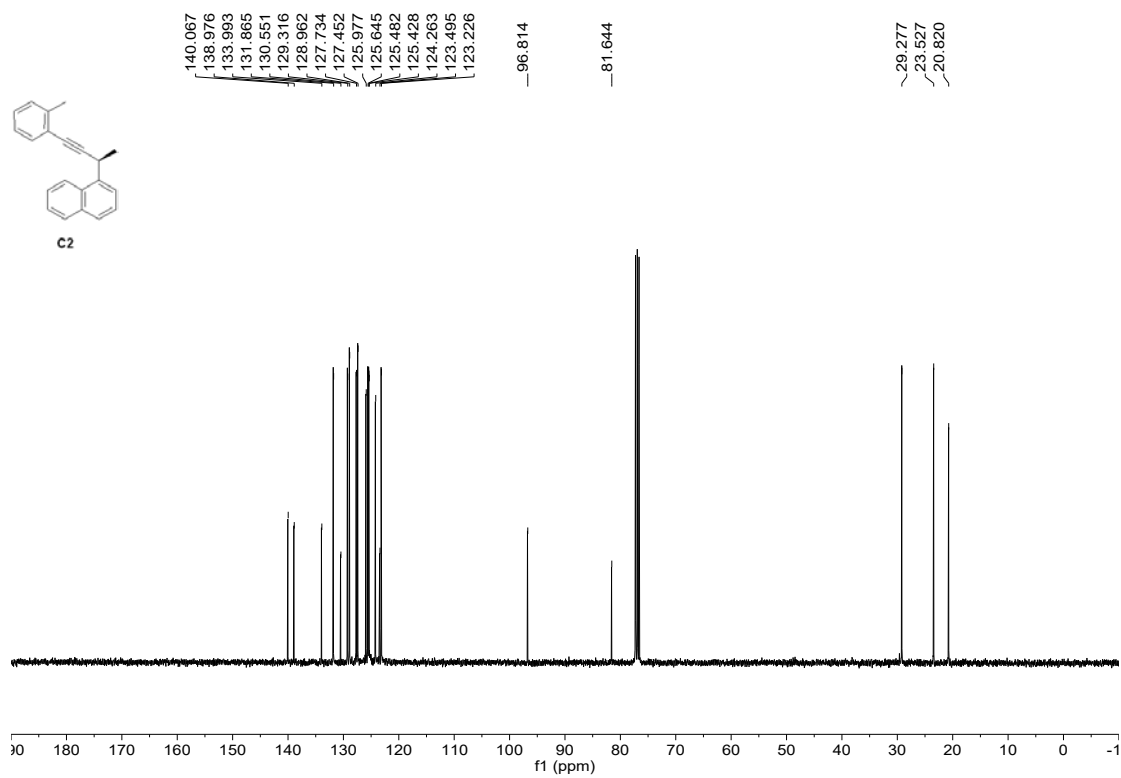

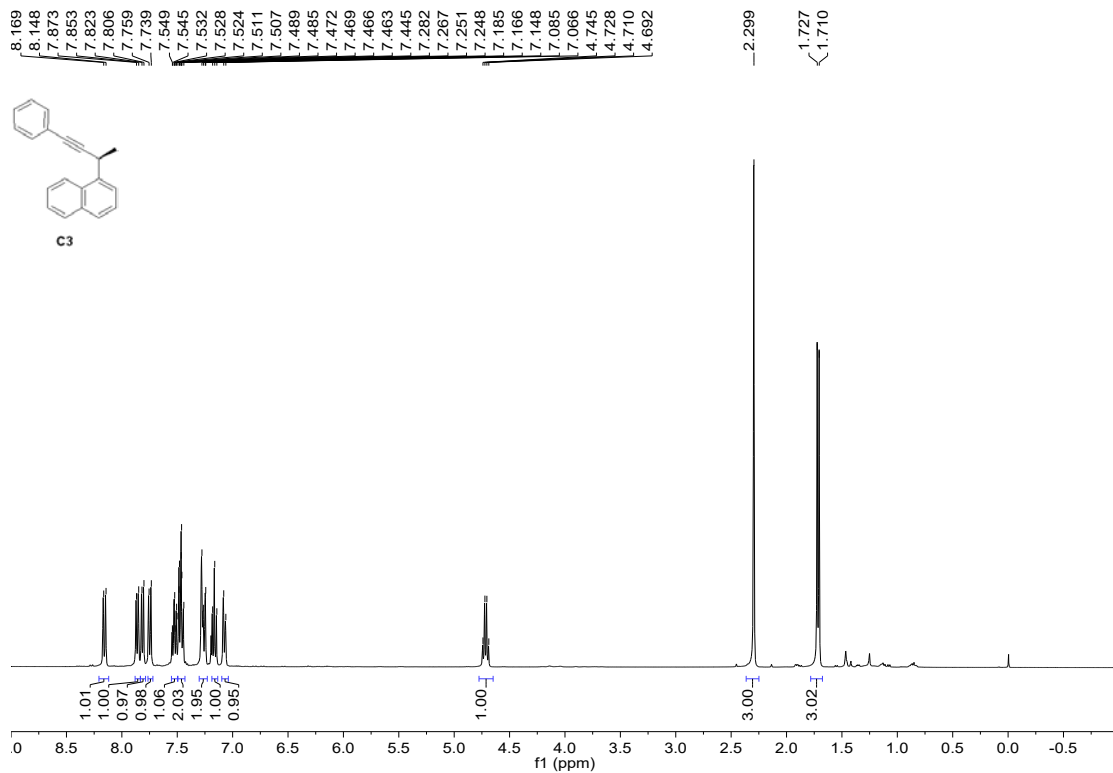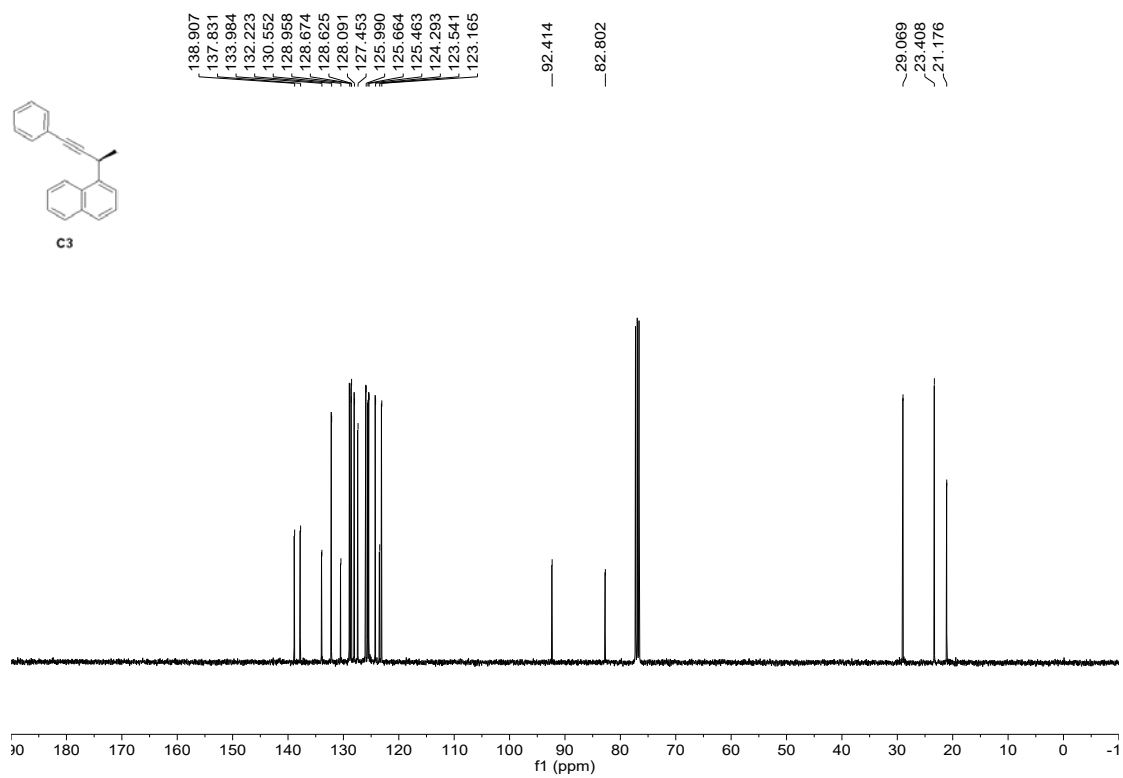

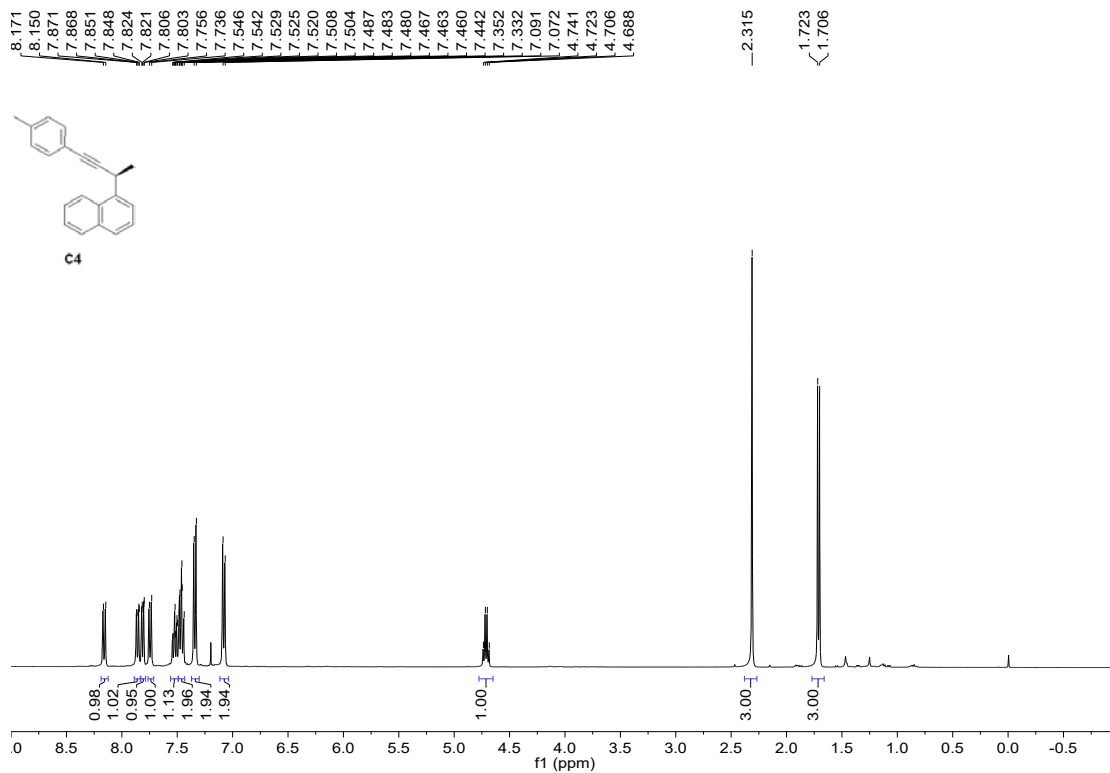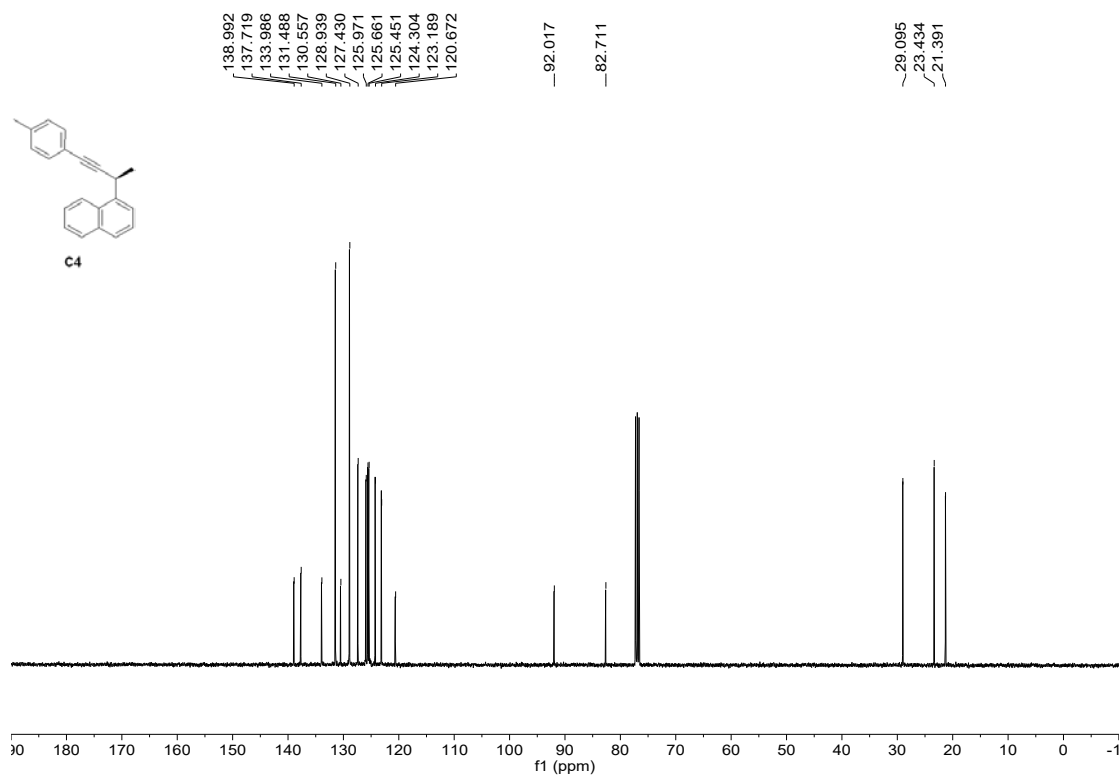

8.172  
8.151  
7.877  
7.874  
7.872  
7.856  
7.852  
7.831  
7.828  
7.813  
7.810  
7.761  
7.740  
7.550  
7.546  
7.533  
7.529  
7.524  
7.511  
7.507  
7.491  
7.488  
7.484  
7.474  
7.471  
7.468  
7.466  
7.463  
7.454  
7.451  
7.445  
7.385  
7.380  
7.369  
7.365  
7.359  
7.124  
7.120  
7.104  
4.729  
4.711  
4.694  
2.643  
2.624  
2.605  
2.586  
1.724  
1.707  
1.223  
1.204  
1.185

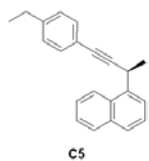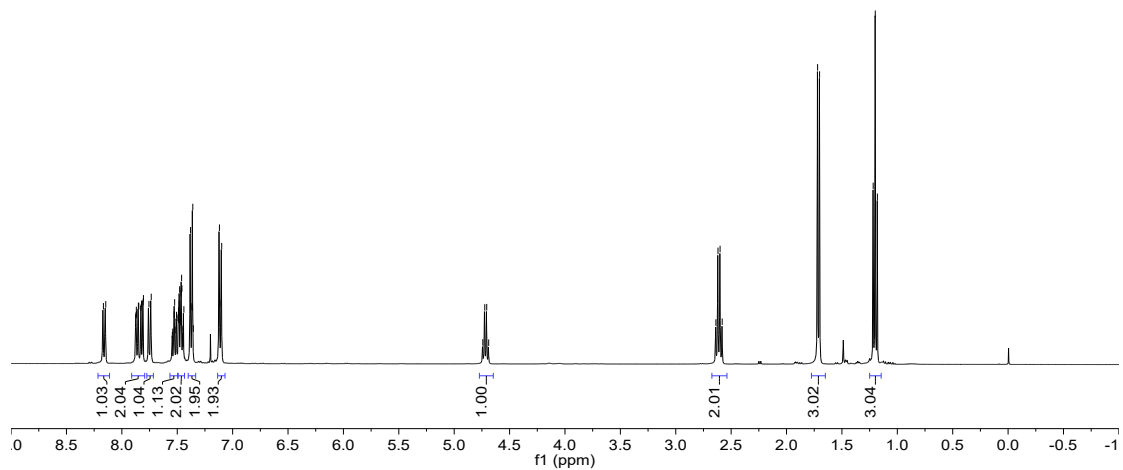

144.070  
138.971  
133.945  
131.566  
130.516  
128.942  
127.750  
127.418  
125.968  
125.655  
125.447  
124.299  
123.171  
120.875  
91.993  
82.727  
29.082  
28.744  
23.446  
15.421

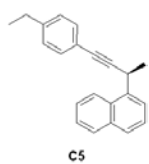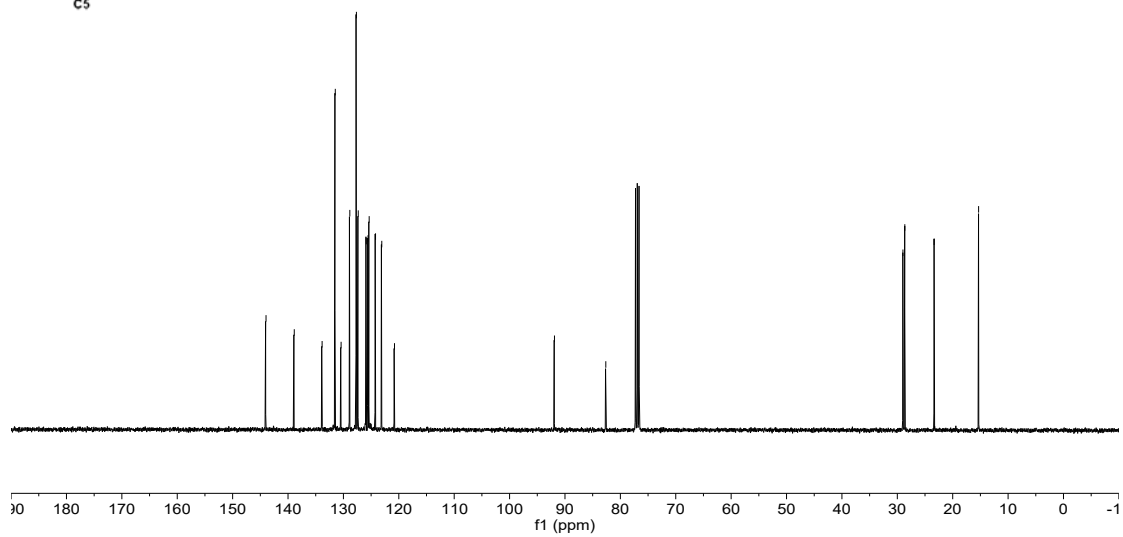

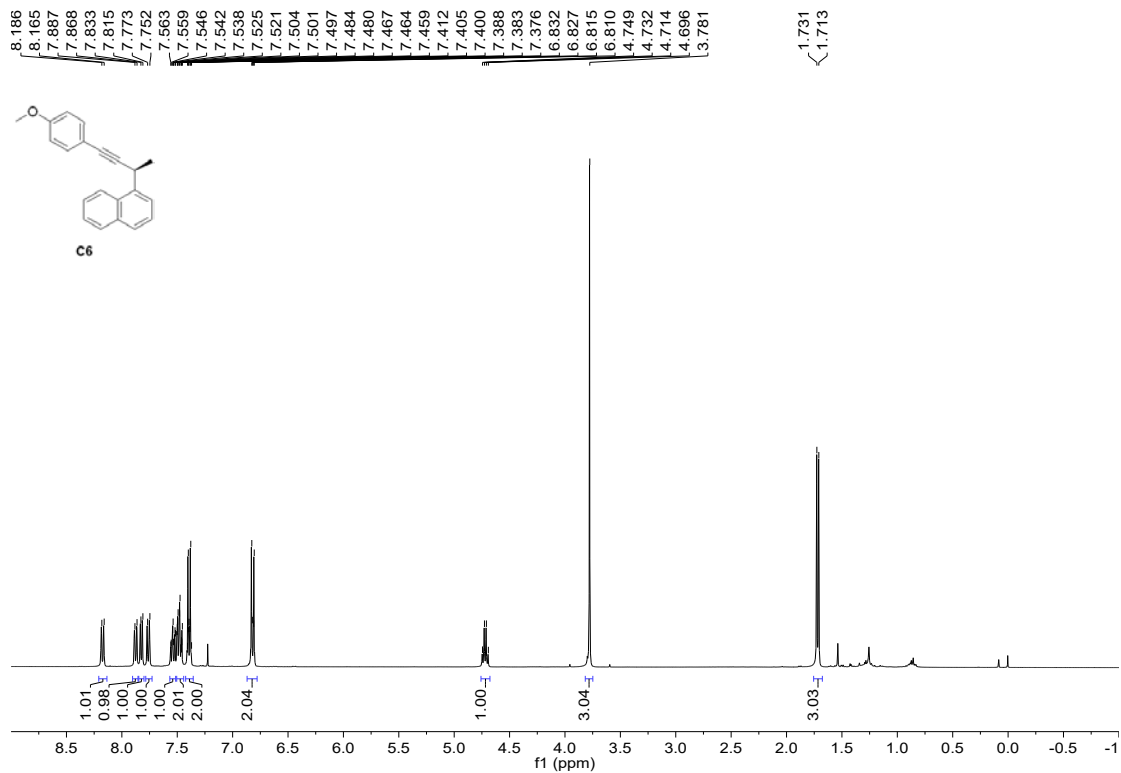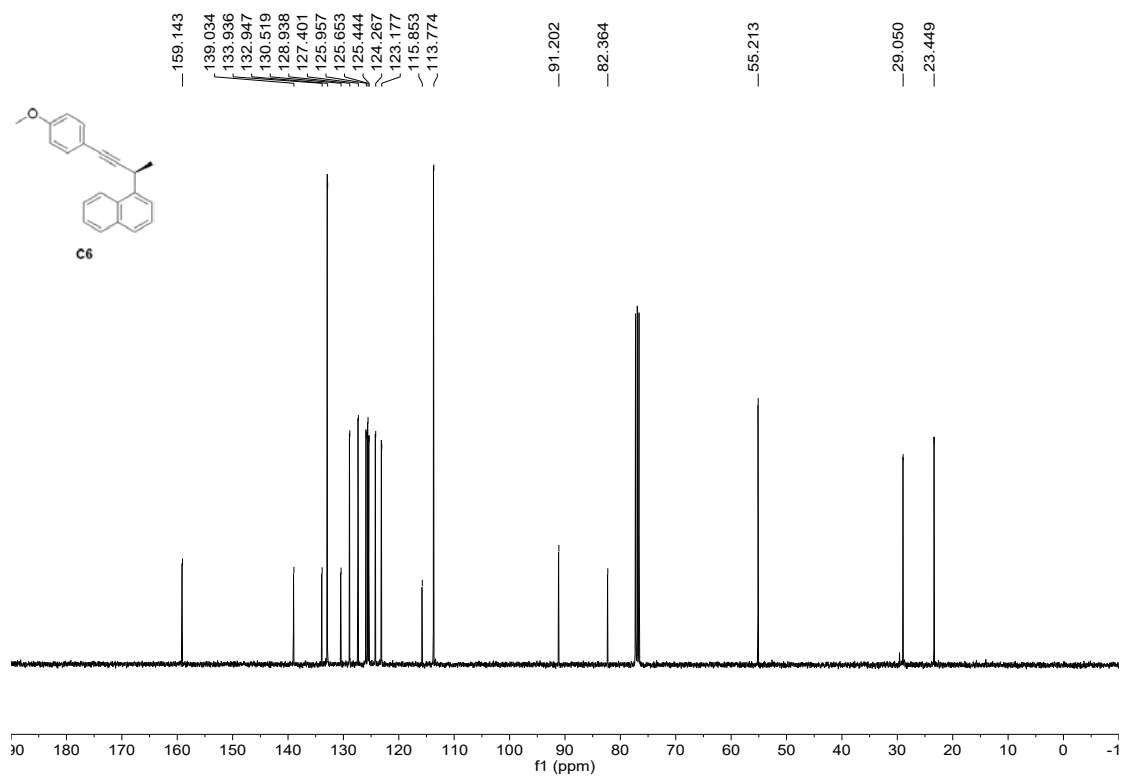

8.170  
8.149  
7.884  
7.882  
7.879  
7.864  
7.860  
7.853  
7.851  
7.836  
7.833  
7.773  
7.753  
7.563  
7.560  
7.546  
7.543  
7.538  
7.525  
7.521  
7.501  
7.498  
7.484  
7.481  
7.478  
7.464  
7.460  
7.449  
7.445  
7.431  
7.426  
7.412  
7.408  
7.267  
7.263  
7.254  
7.249  
7.245  
7.242  
7.235  
7.230  
7.228  
7.223  
7.215  
7.210  
7.073  
7.070  
7.067  
7.051  
7.049  
7.032  
7.029  
4.795  
4.777  
4.742  
4.759  
1.750  
1.732

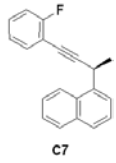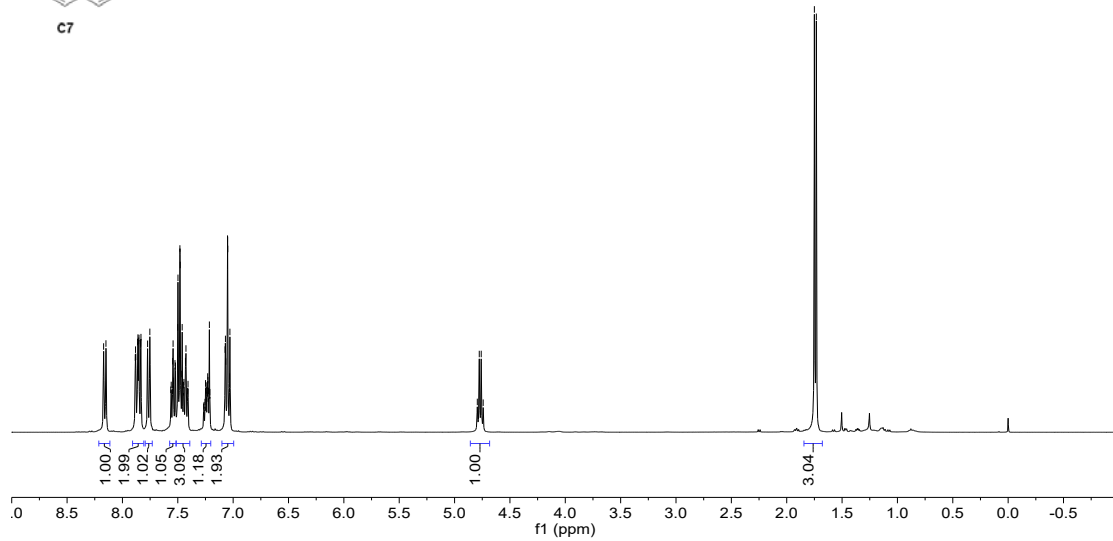

164.101  
161.610  
138.452  
133.954  
133.496  
130.454  
129.426  
129.347  
128.970  
127.542  
126.040  
125.685  
125.504  
124.372  
123.788  
123.751  
123.108  
115.467  
115.258  
112.277  
112.124  
98.173  
98.138  
76.084  
29.307  
23.301

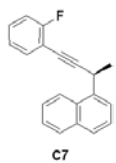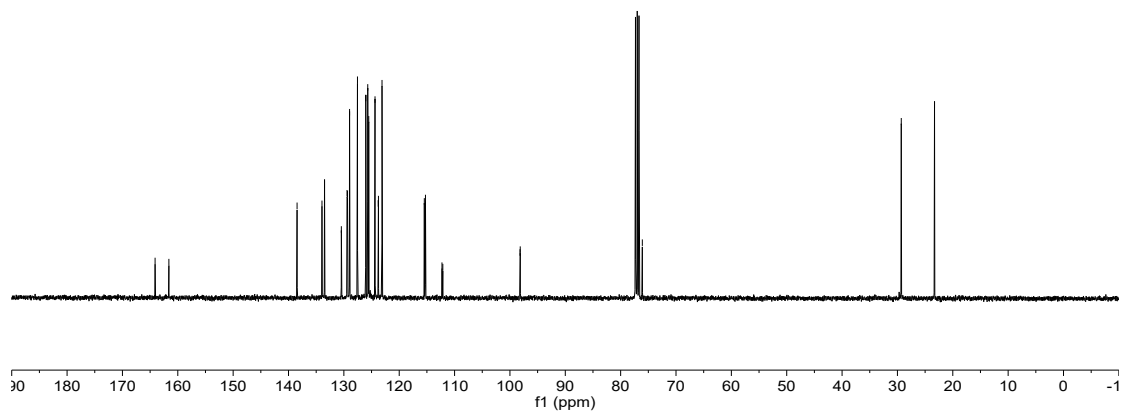

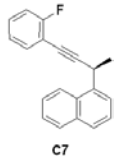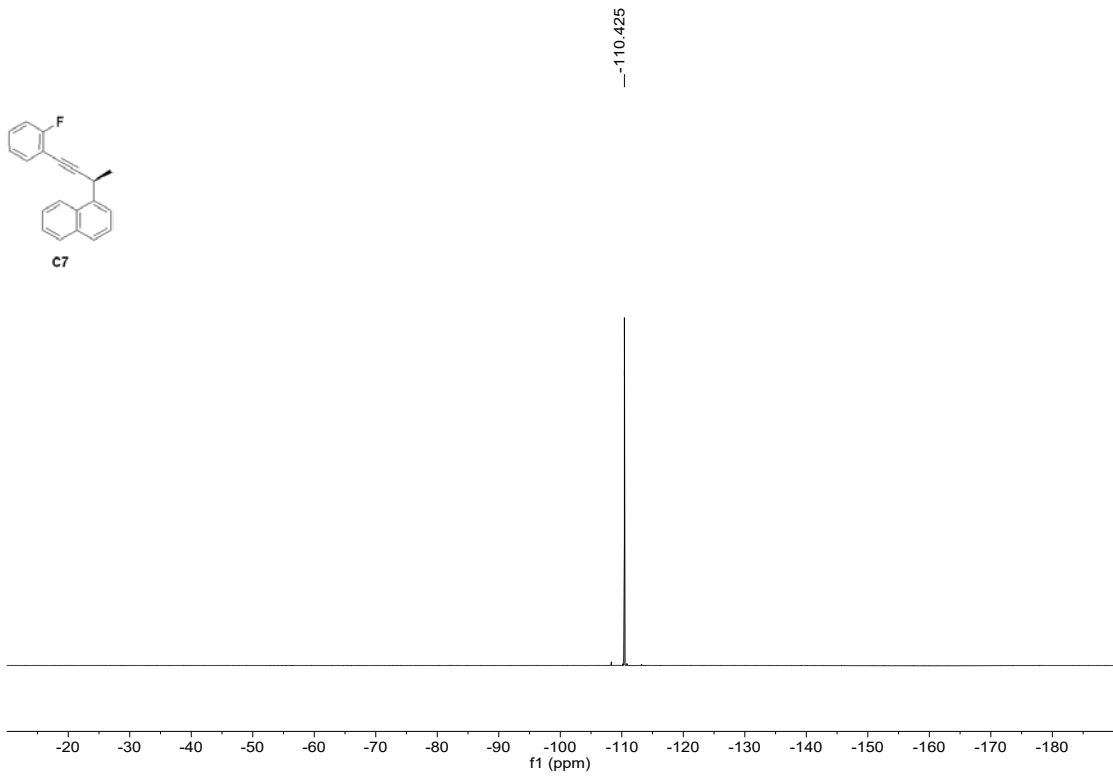

8.151  
8.130  
7.880  
7.876  
7.860  
7.856  
7.788  
7.785  
7.770  
7.767  
7.749  
7.557  
7.553  
7.540  
7.536  
7.532  
7.519  
7.515  
7.498  
7.495  
7.487  
7.481  
7.478  
7.475  
7.470  
7.467  
7.461  
7.458  
7.449  
7.229  
7.217  
7.213  
7.211  
7.207  
7.204  
7.196  
7.161  
7.158  
7.153  
7.136  
7.129  
6.994  
6.987  
6.981  
6.977  
6.971  
6.965  
6.961  
6.954  
6.949  
6.942  
4.738  
4.721  
4.703  
4.685  
1.727  
1.709

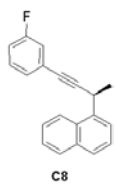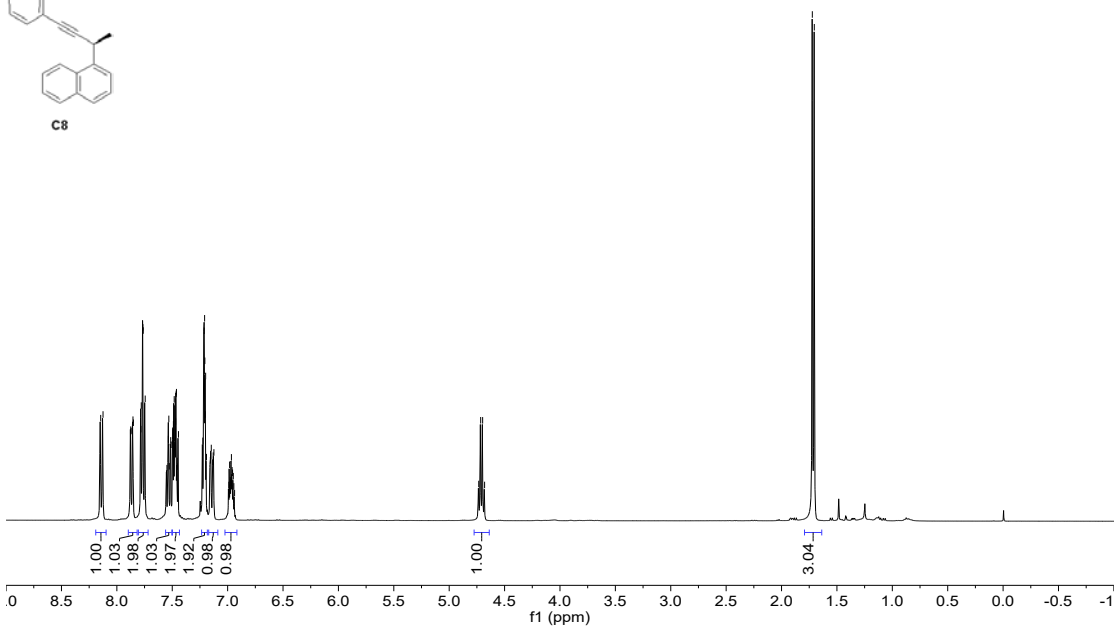

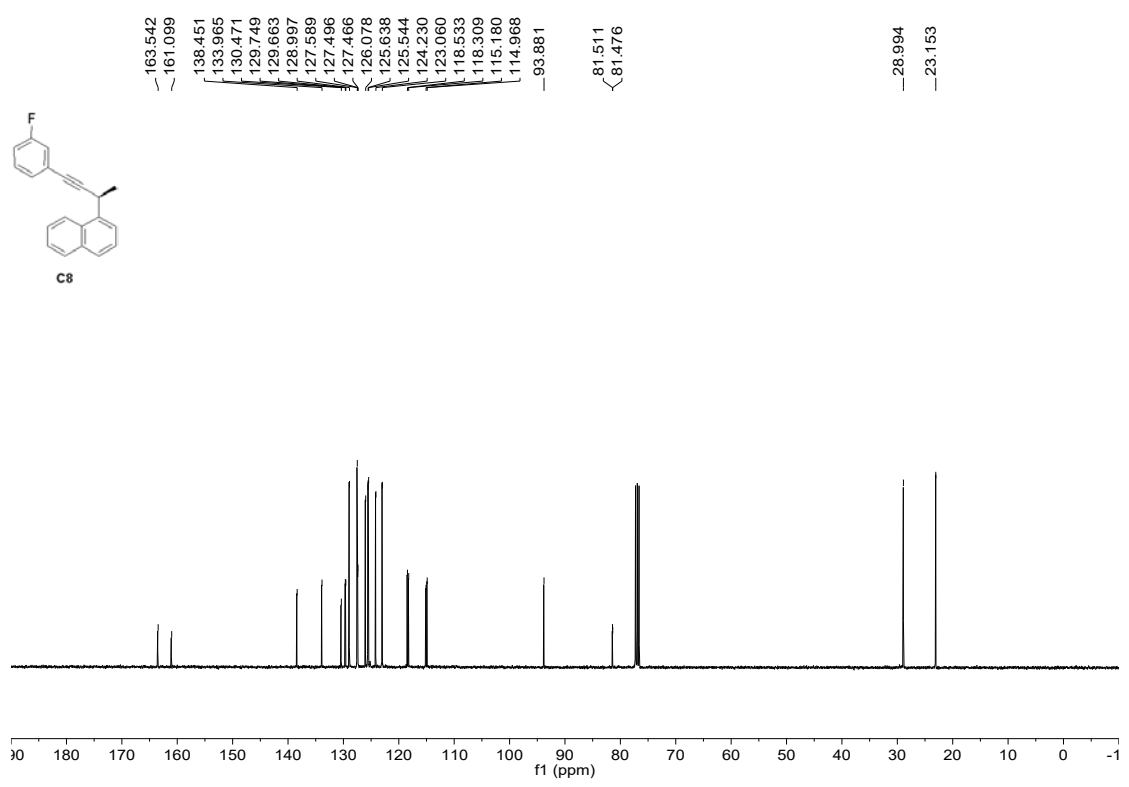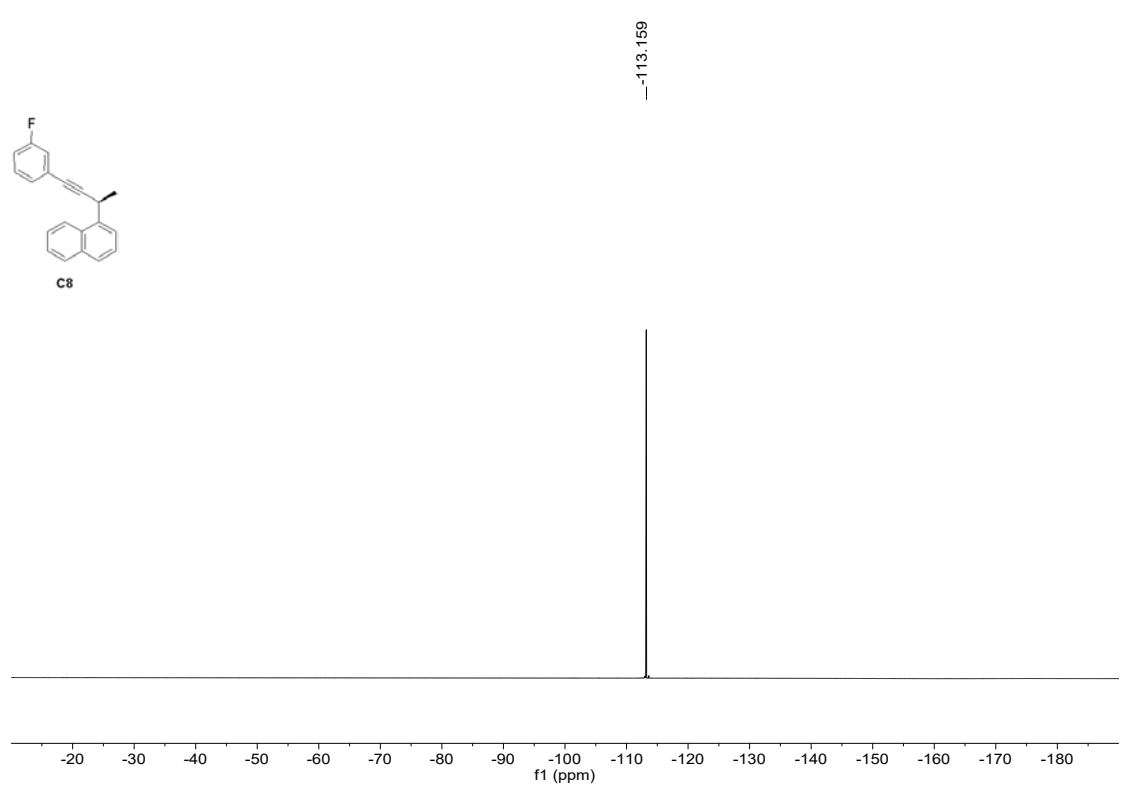



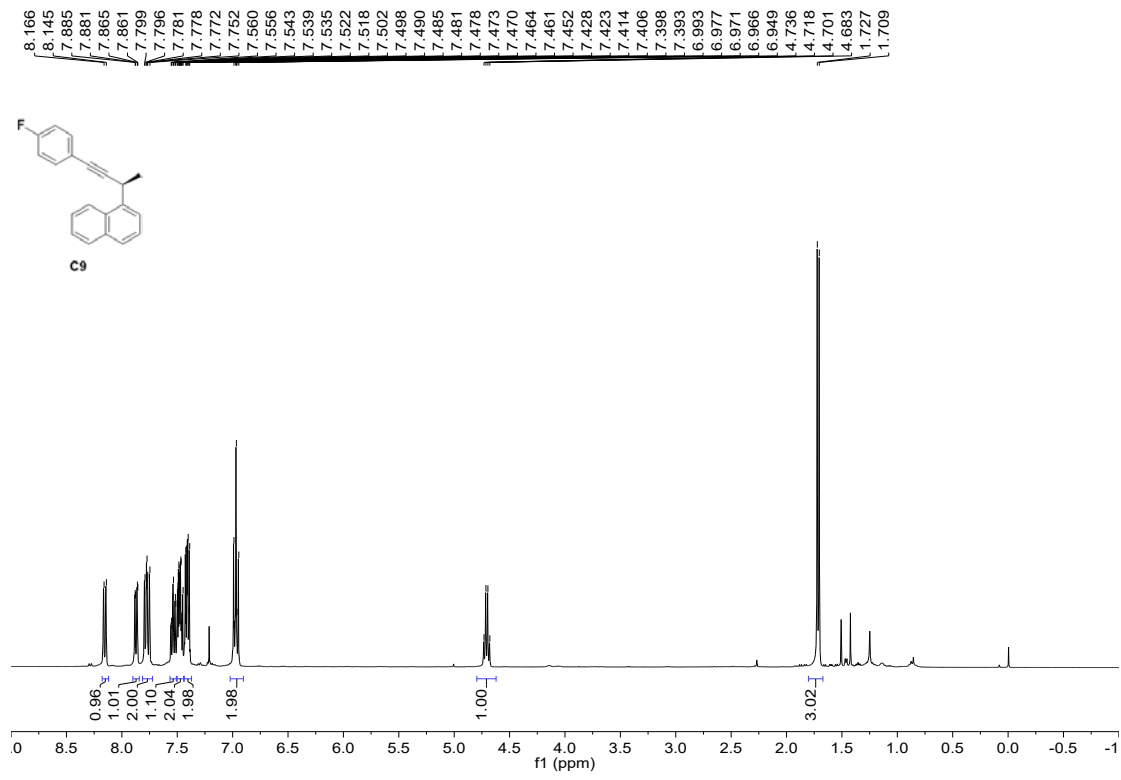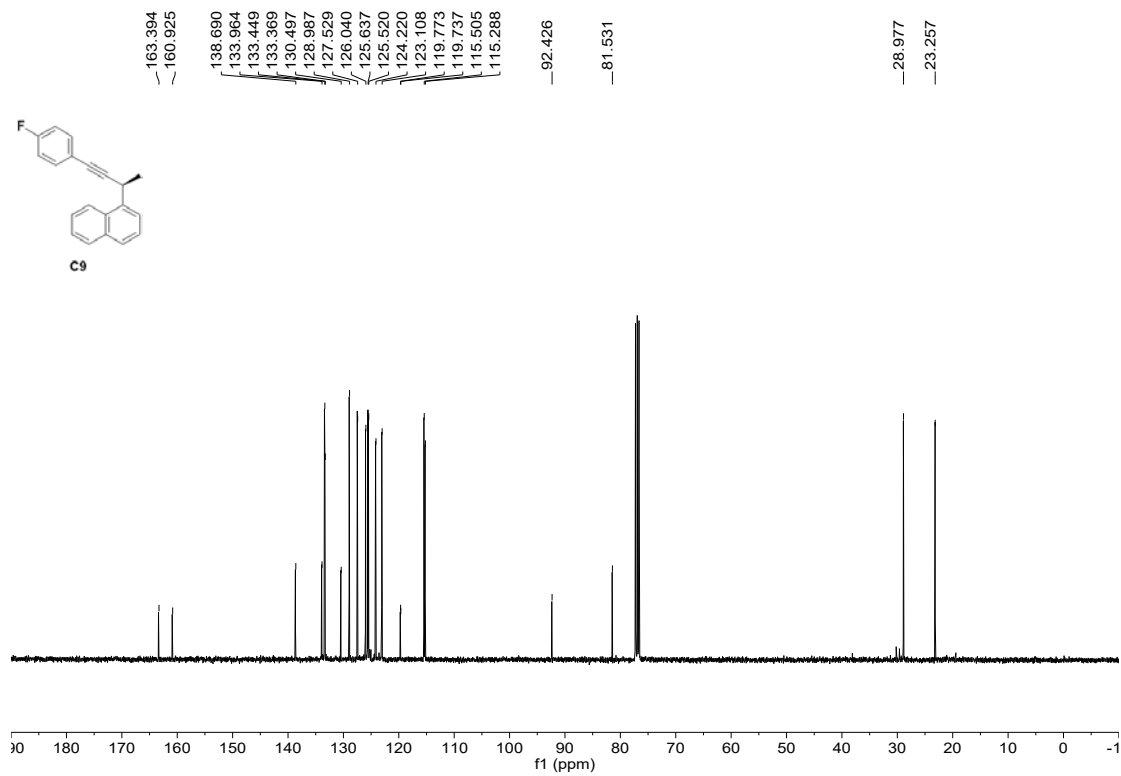

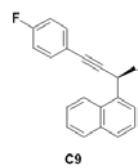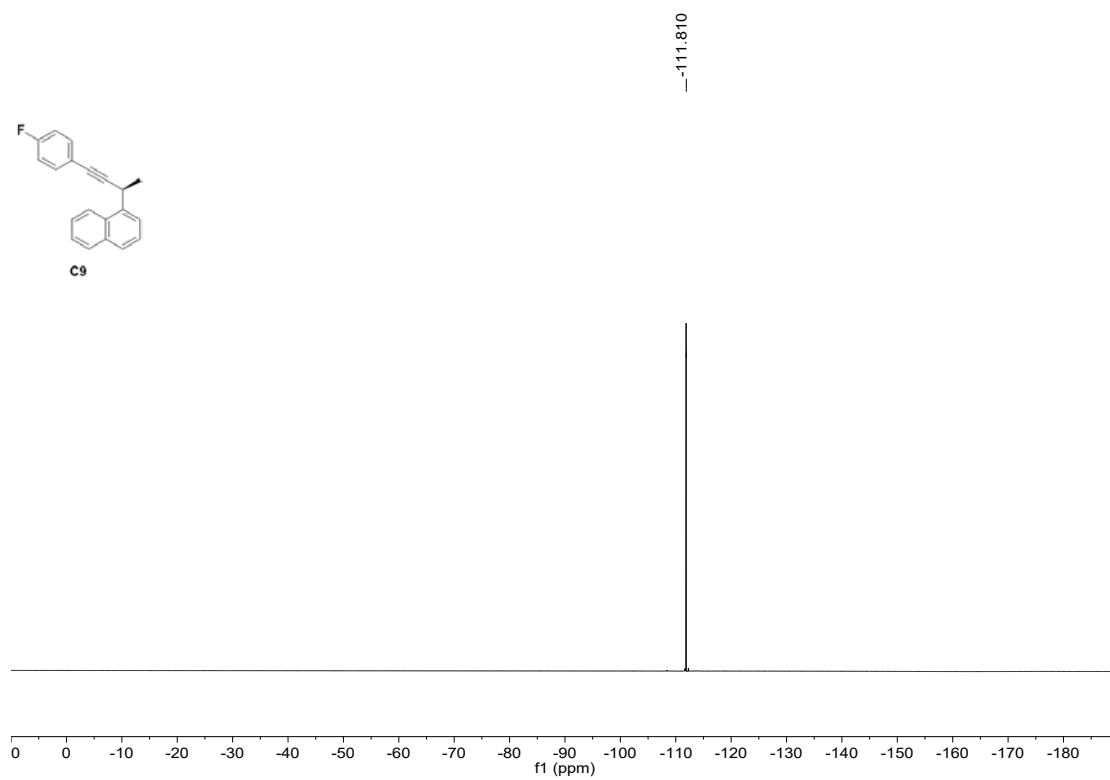

8.152  
8.131  
7.878  
7.858  
7.782  
7.766  
7.748  
7.555  
7.551  
7.538  
7.534  
7.530  
7.517  
7.513  
7.498  
7.494  
7.485  
7.480  
7.477  
7.474  
7.468  
7.465  
7.460  
7.457  
7.447  
7.363  
7.347  
7.342  
7.253  
7.248  
7.231  
4.733  
4.716  
4.696  
4.681

1.724  
1.706

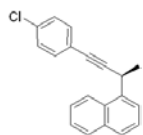

C10

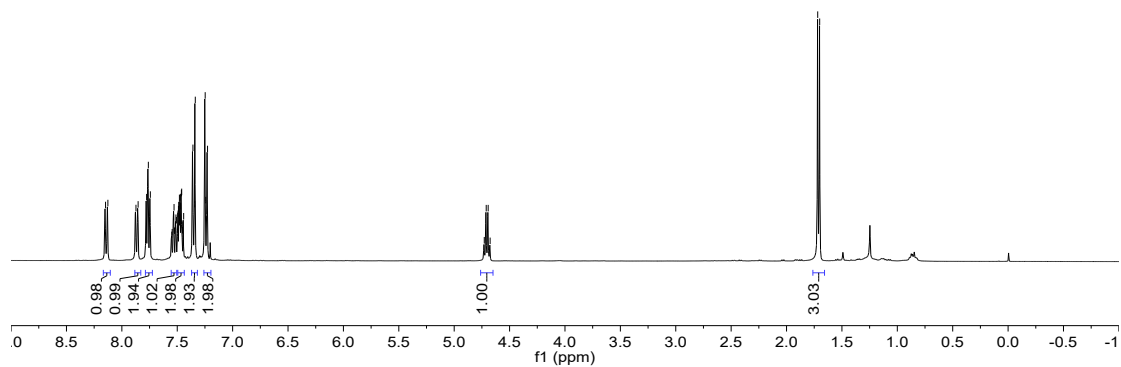

138.530  
133.959  
133.665  
132.833  
130.472  
128.991  
128.479  
127.567  
126.059  
125.627  
125.533  
124.212  
123.070  
122.189

93.833

81.521

29.023

23.182

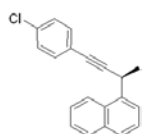

C10

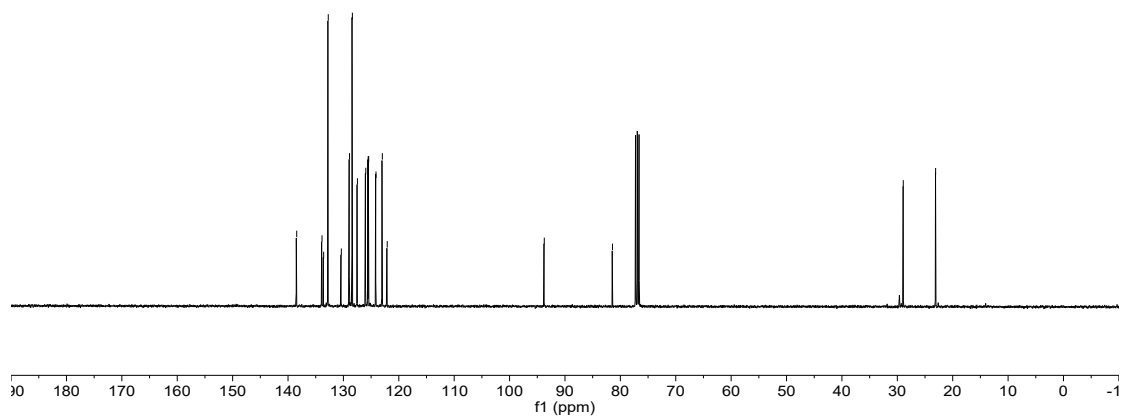

8.150  
8.129  
7.878  
7.858  
7.781  
7.778  
7.769  
7.760  
7.749  
7.565  
7.551  
7.538  
7.534  
7.530  
7.517  
7.513  
7.498  
7.495  
7.485  
7.478  
7.475  
7.468  
7.465  
7.461  
7.458  
7.447  
7.410  
7.405  
7.394  
7.389  
7.383  
7.302  
7.296  
7.291  
7.279  
7.275  
4.727  
4.709  
4.691  
4.674  
1.723  
1.705

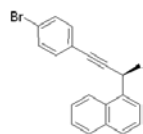

C11

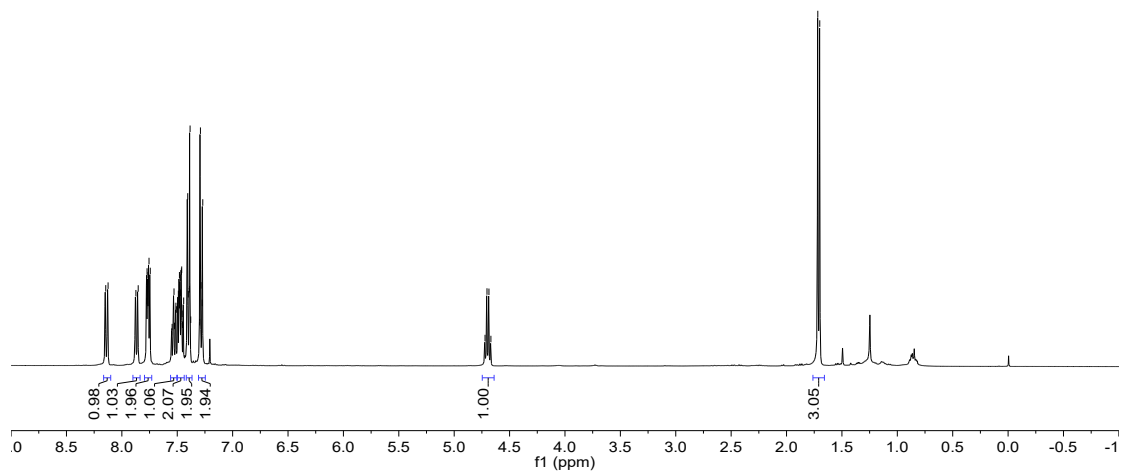

138.481  
133.951  
133.070  
131.395  
130.464  
128.990  
127.568  
126.059  
125.625  
125.532  
124.210  
123.062  
122.650  
121.857  
94.043  
81.578  
29.040  
23.153

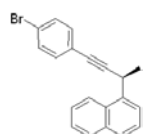

C11

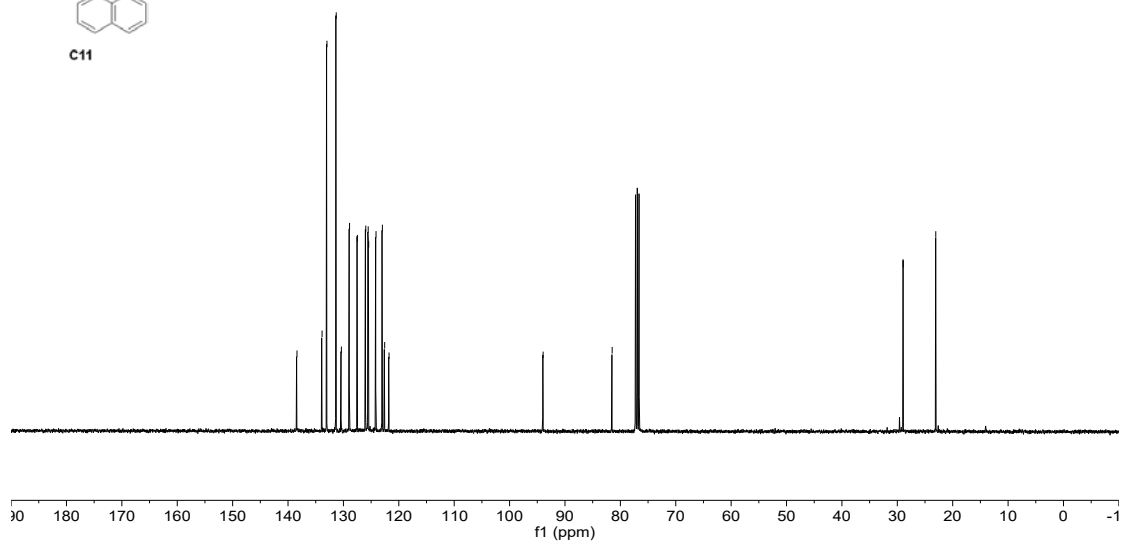

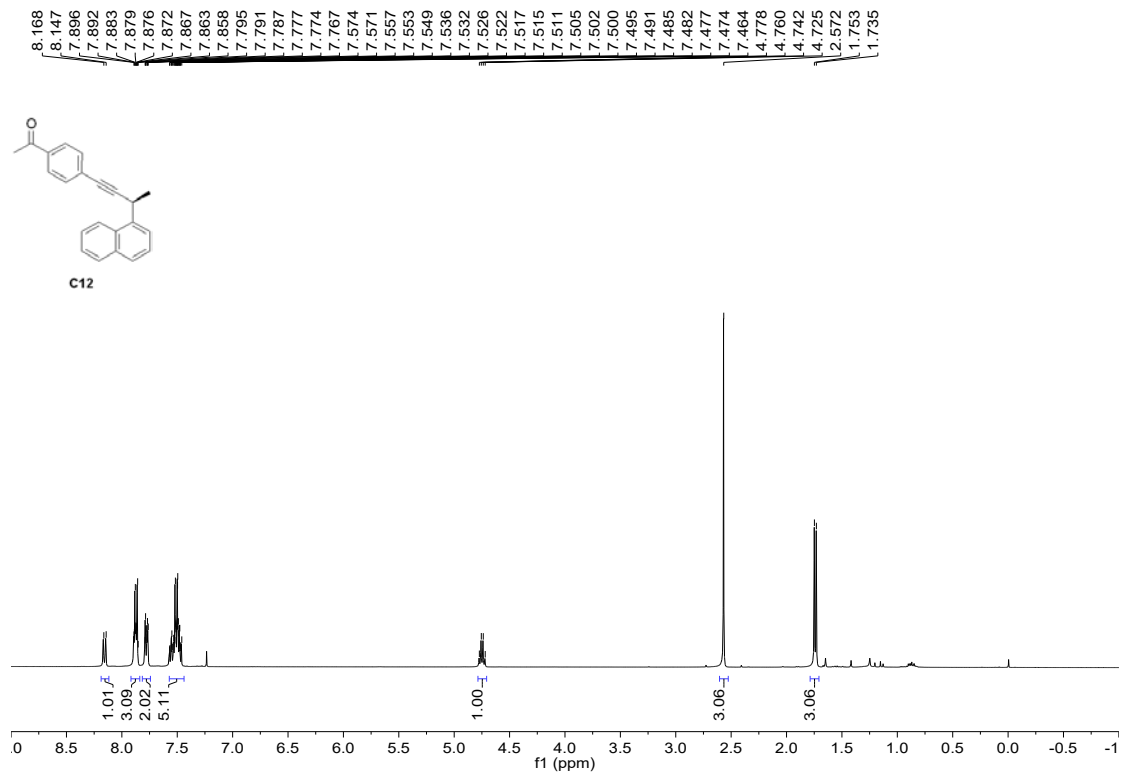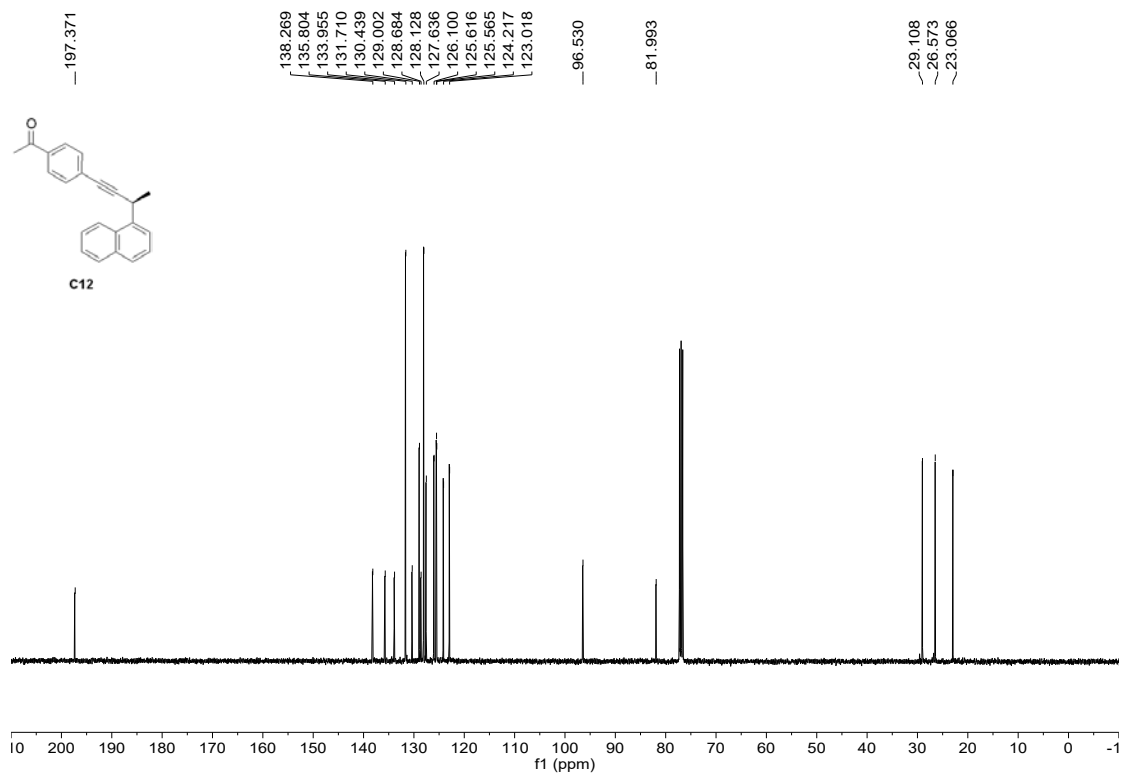

8.369  
8.348  
8.235  
8.214  
7.916  
7.914  
7.898  
7.896  
7.886  
7.882  
7.866  
7.862  
7.810  
7.806  
7.791  
7.787  
7.775  
7.766  
7.754  
7.745  
7.681  
7.678  
7.663  
7.660  
7.567  
7.564  
7.550  
7.547  
7.542  
7.529  
7.525  
7.510  
7.506  
7.502  
7.498  
7.490  
7.485  
7.479  
7.464  
7.460  
7.447  
7.443  
7.394  
7.376  
7.373  
7.355  
4.907  
4.890  
4.872  
4.854  
1.835  
1.817

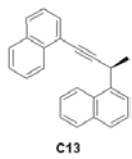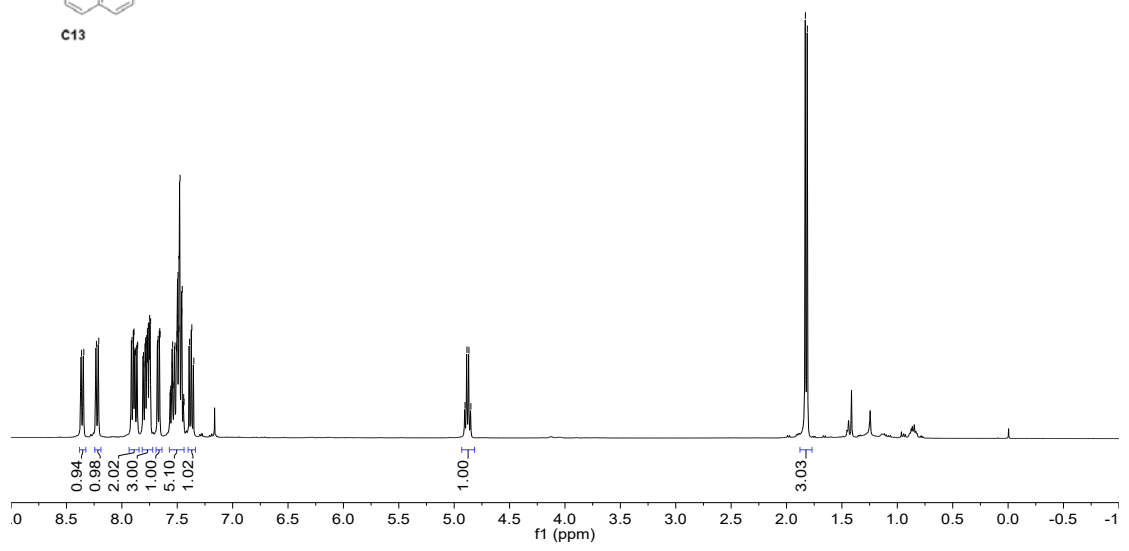

138.836  
133.999  
133.474  
130.147  
130.547  
130.186  
129.002  
128.183  
127.543  
126.561  
126.265  
126.228  
126.065  
125.696  
125.537  
124.344  
123.196  
121.349  
97.830  
80.760  
29.411  
23.518

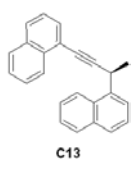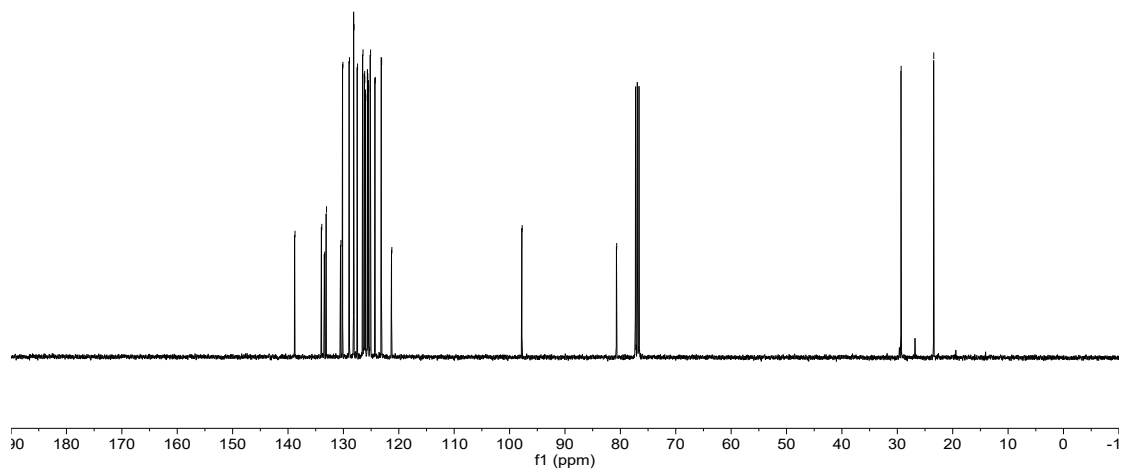

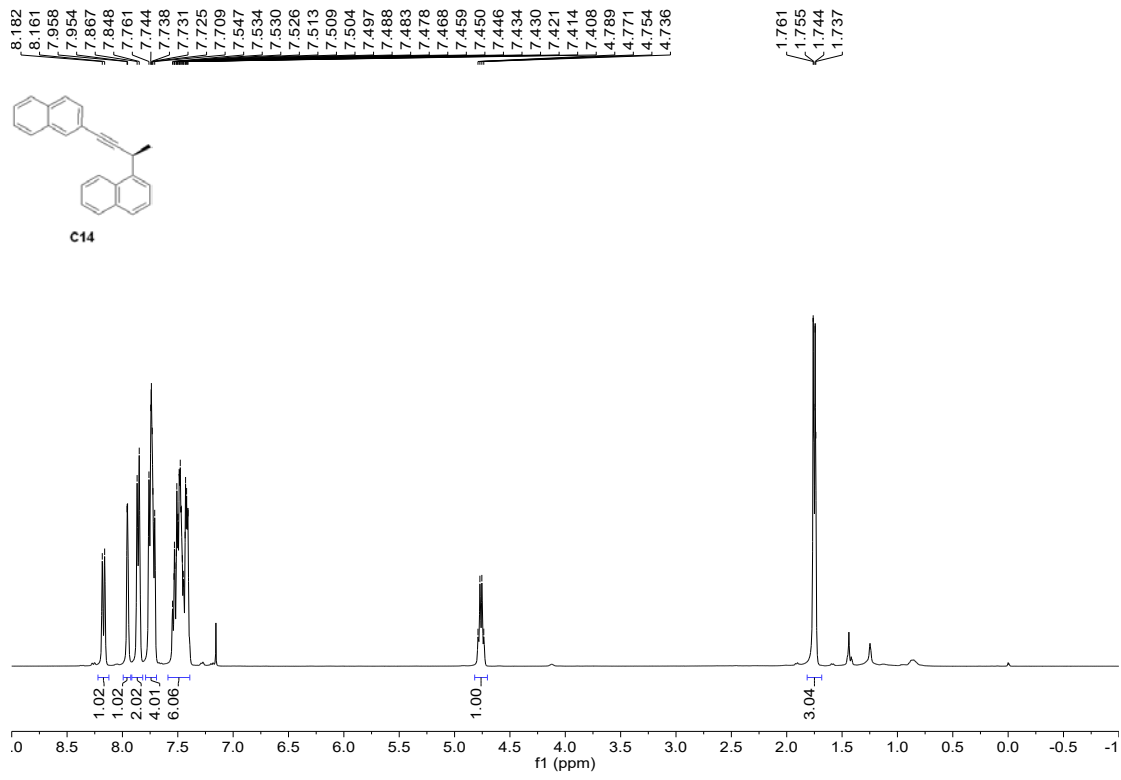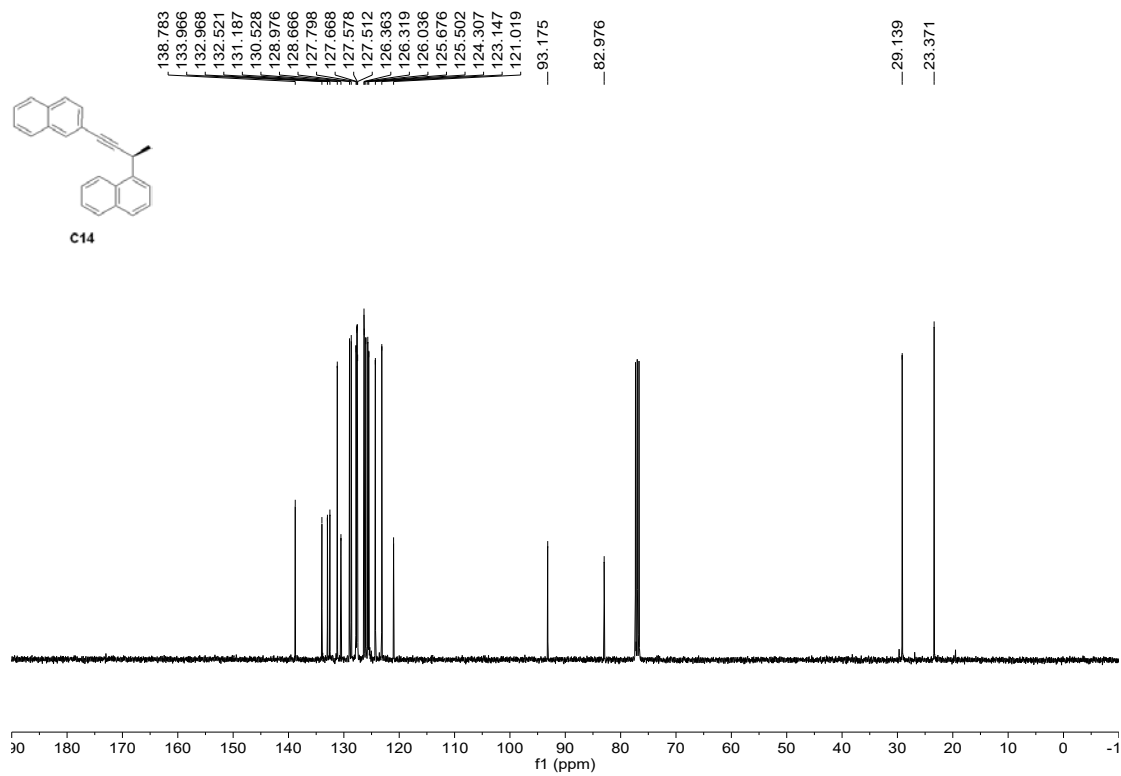

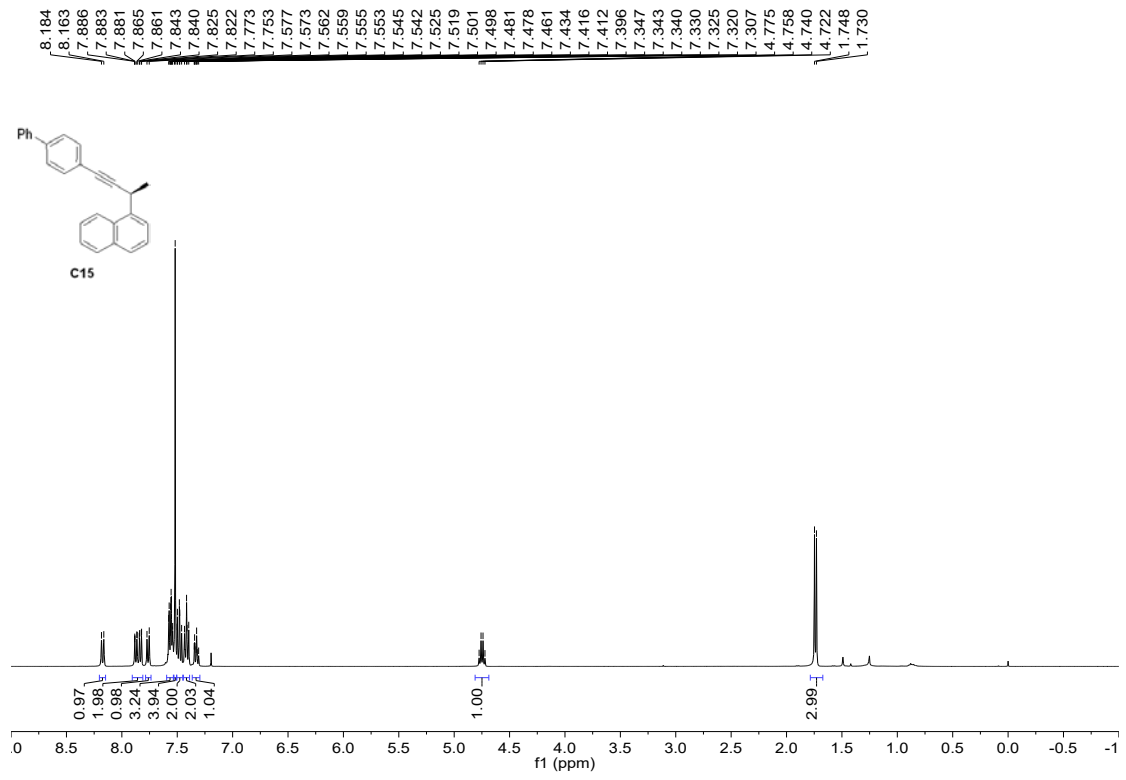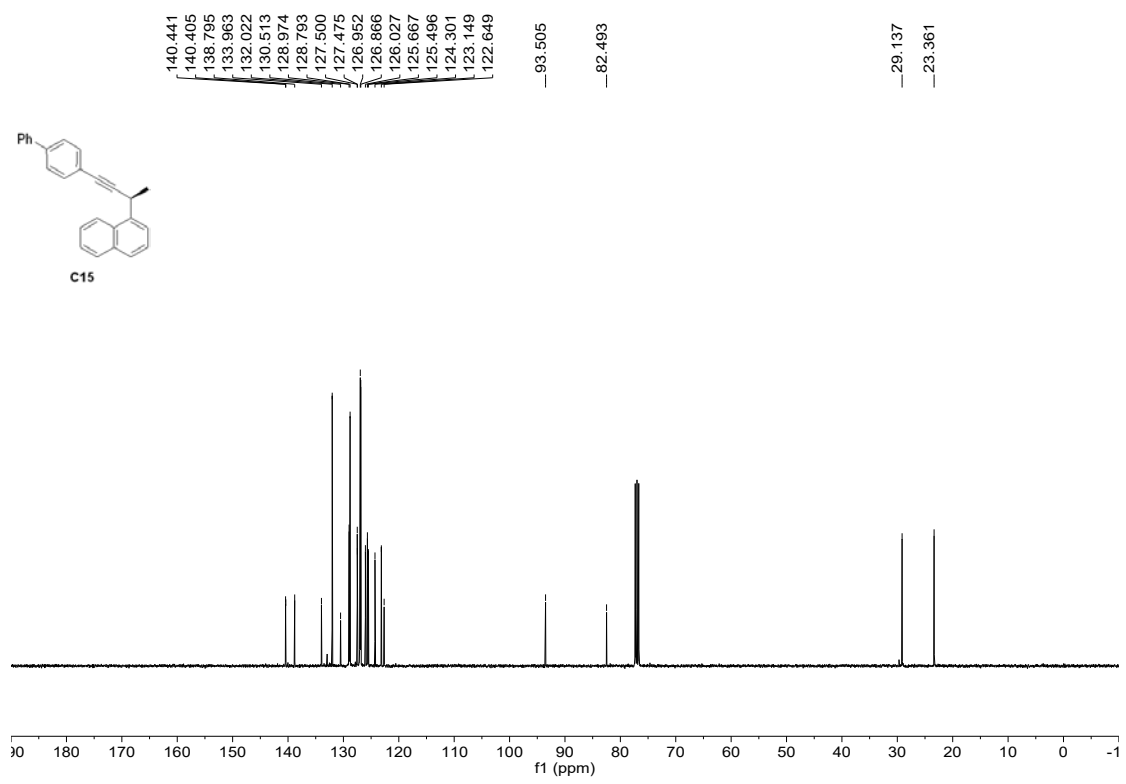



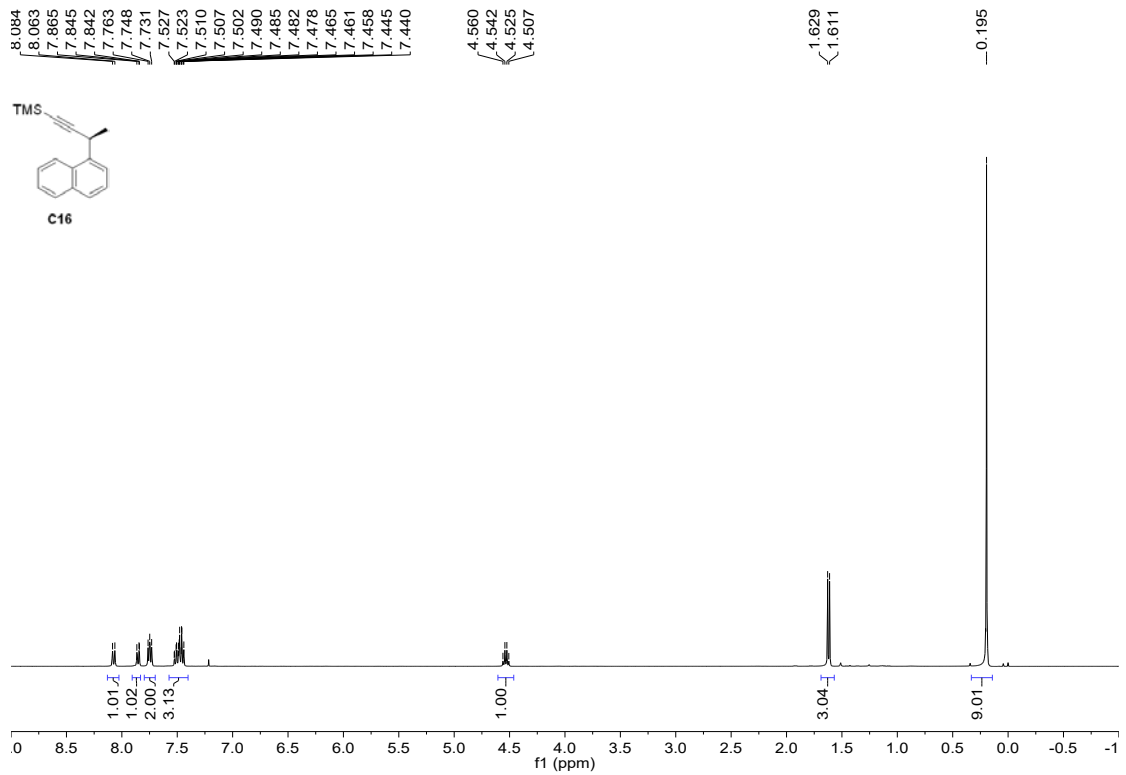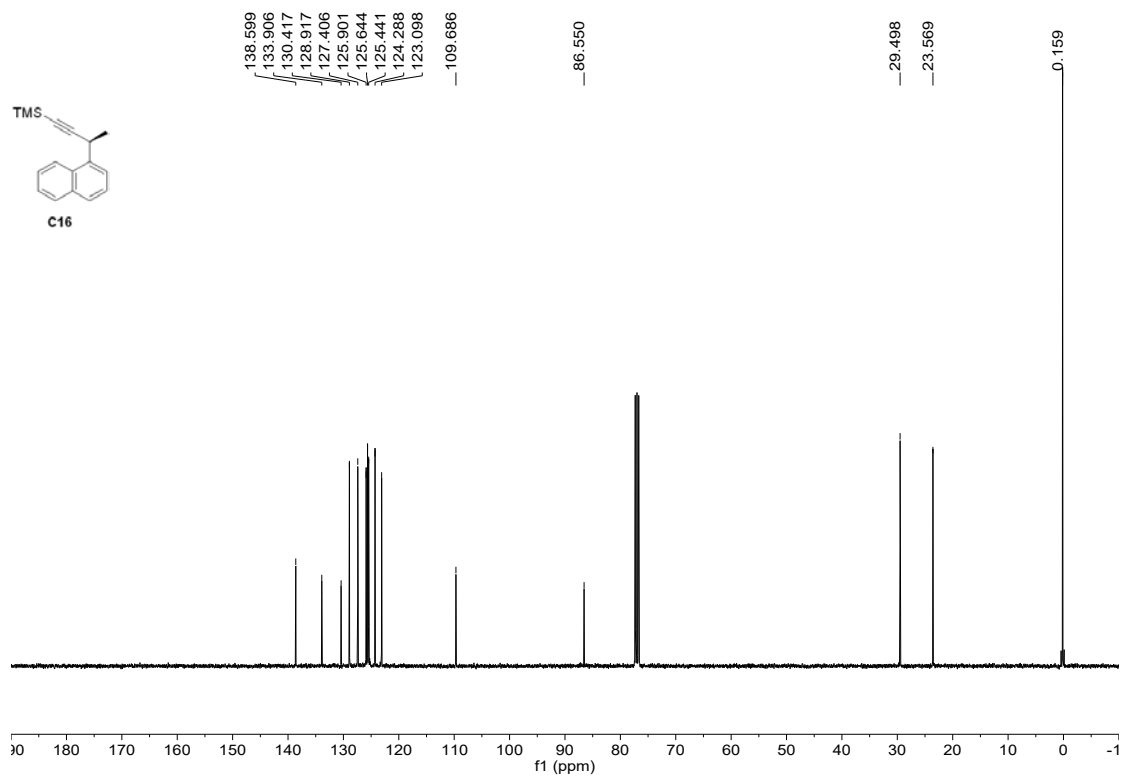

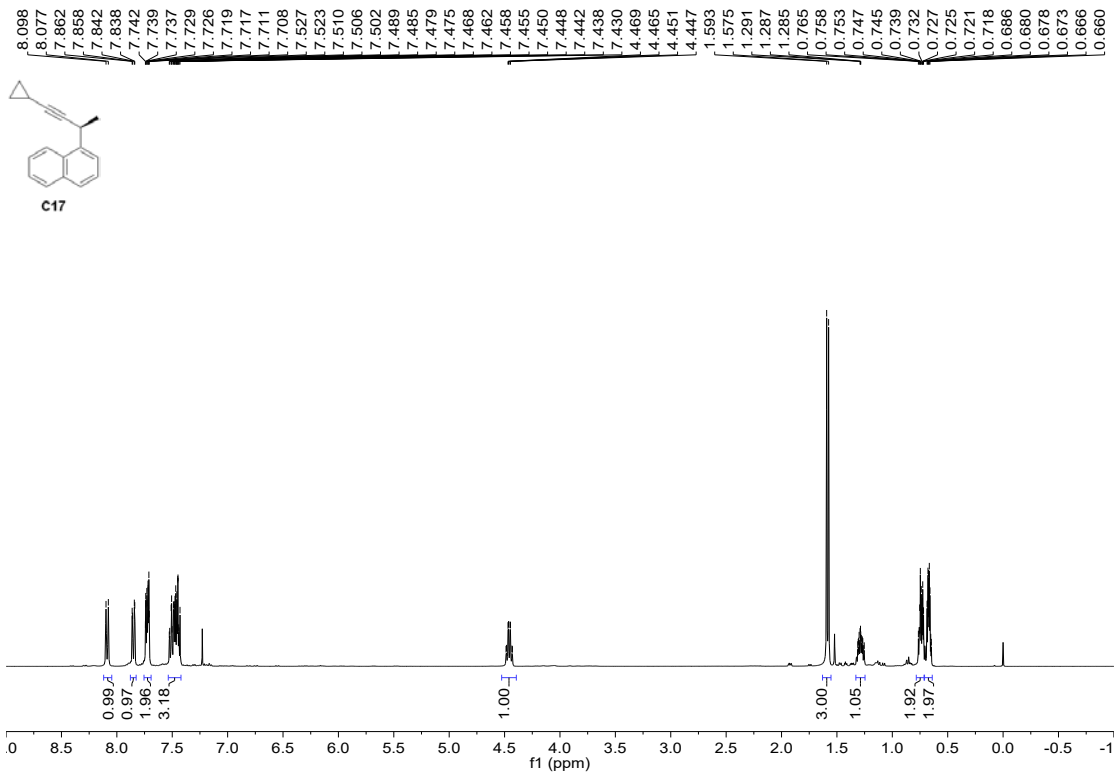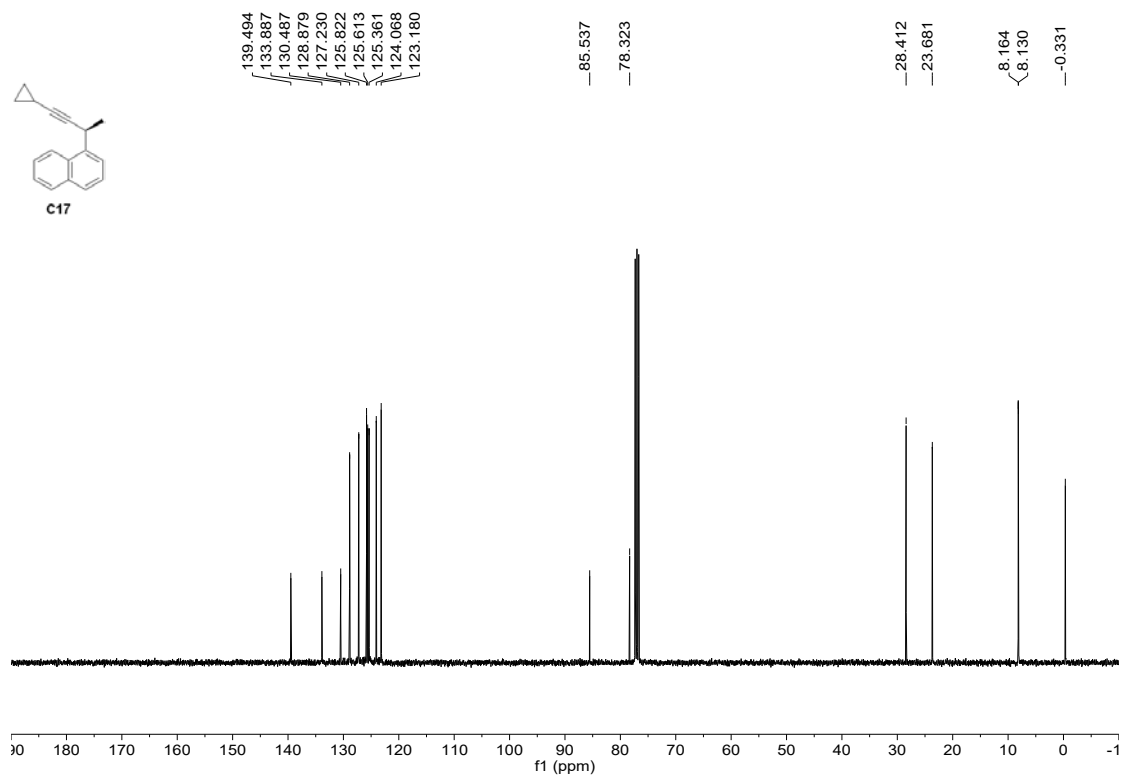

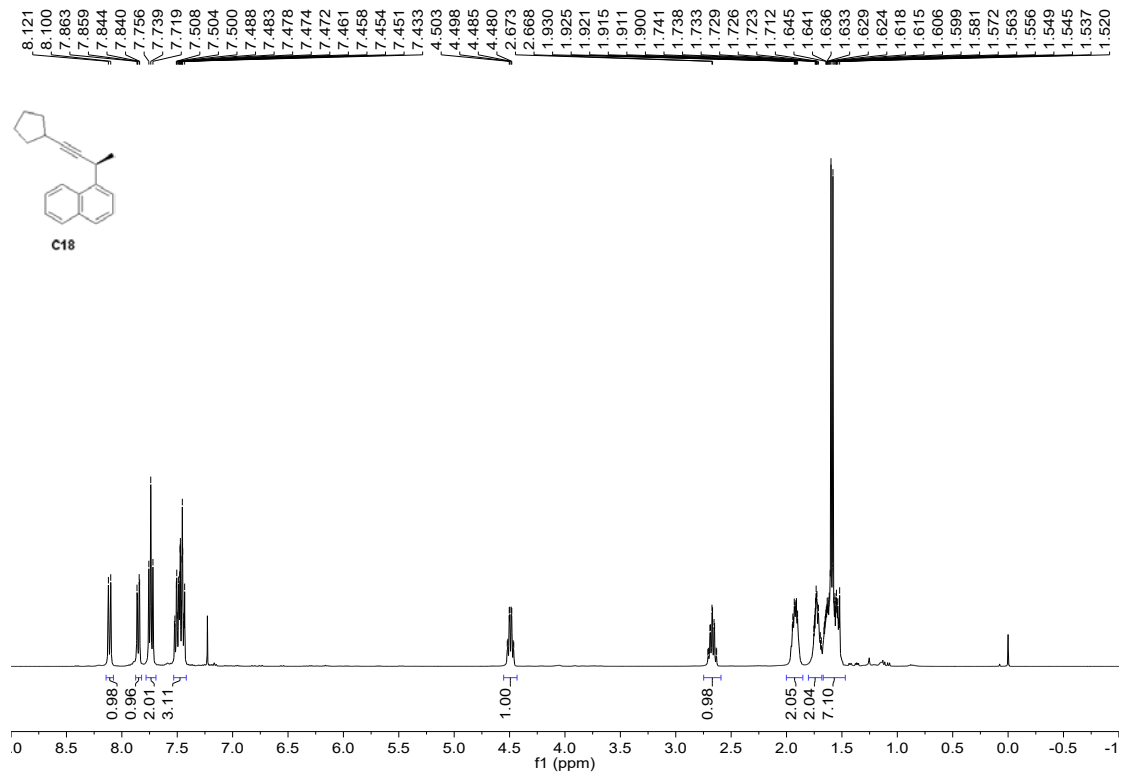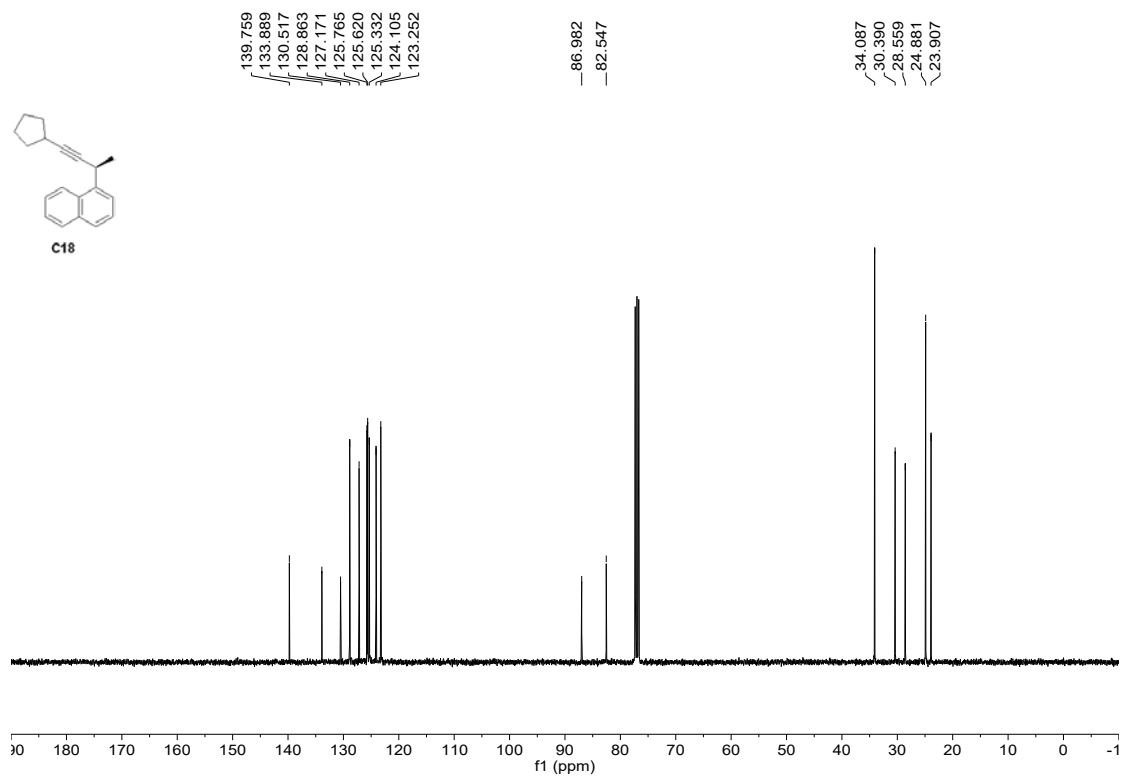

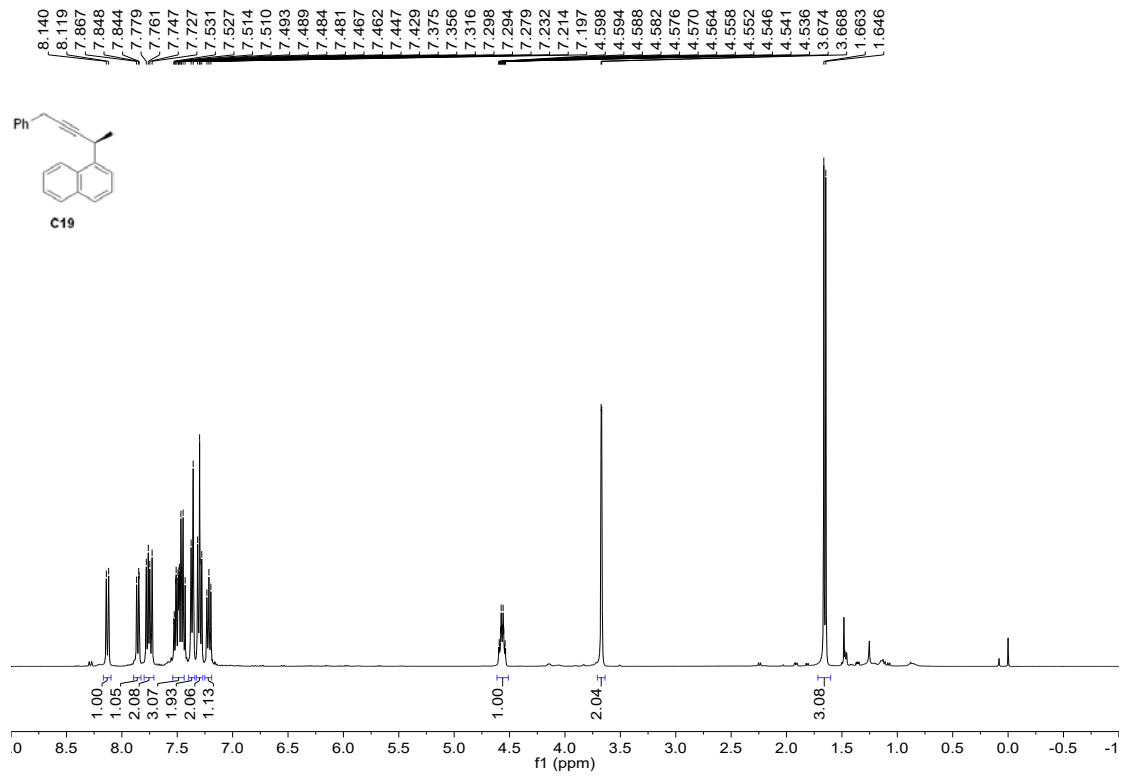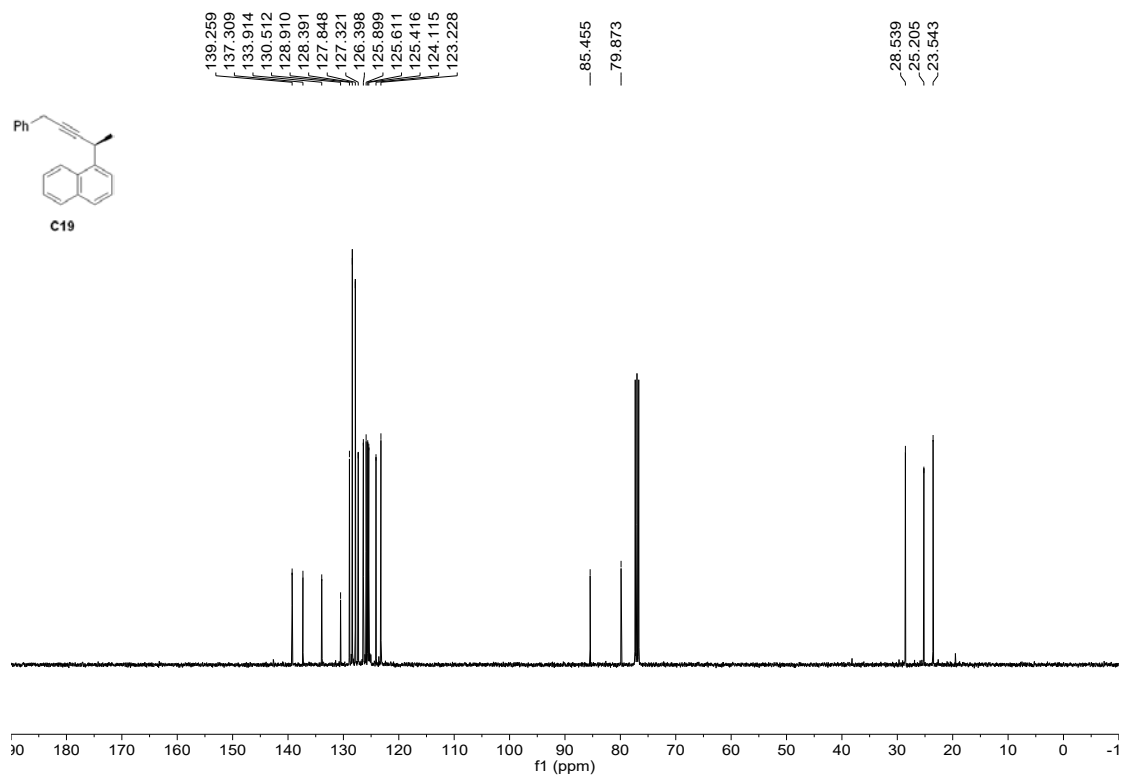

8.079  
8.058  
7.859  
7.840  
7.836  
7.733  
7.713  
7.641  
7.624  
7.513  
7.509  
7.496  
7.492  
7.488  
7.475  
7.470  
7.454  
7.451  
7.434  
7.414  
7.395  
7.288  
7.284  
7.280  
7.270  
7.268  
7.259  
7.252  
7.222  
7.204  
7.202  
7.195  
7.190  
7.186  
4.493  
4.487  
4.481  
4.475  
4.470  
4.463  
4.458  
4.452  
4.440  
2.858  
2.840  
2.821  
2.556  
2.550  
2.537  
2.531  
2.518  
2.513  
1.588  
1.570

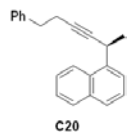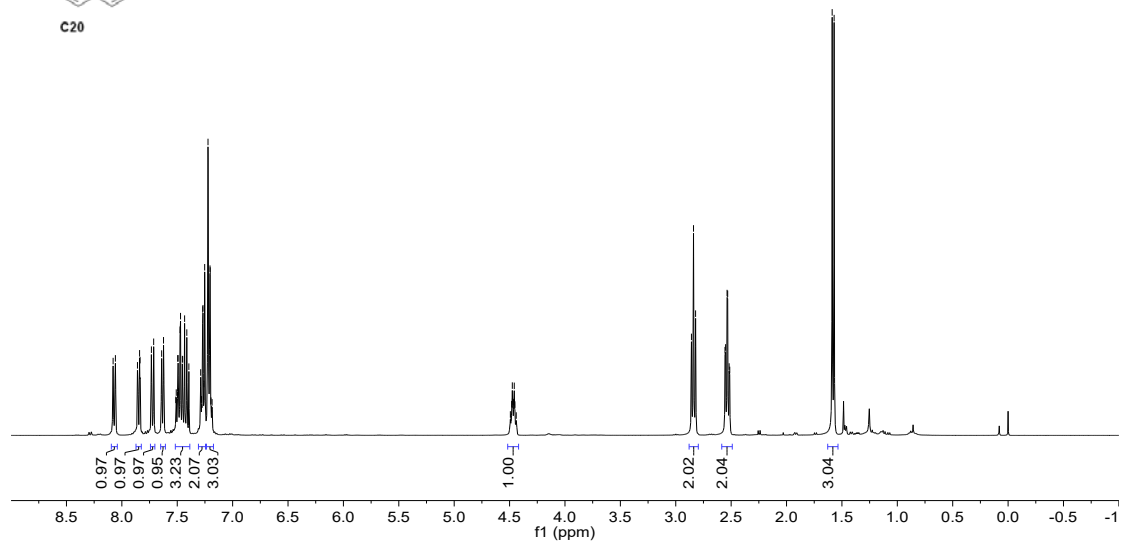

140.869  
139.318  
133.865  
130.485  
128.876  
128.550  
128.262  
127.213  
126.132  
125.842  
125.610  
125.352  
124.096  
123.184  
83.890  
81.765  
35.379  
28.374  
23.559  
21.083

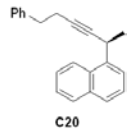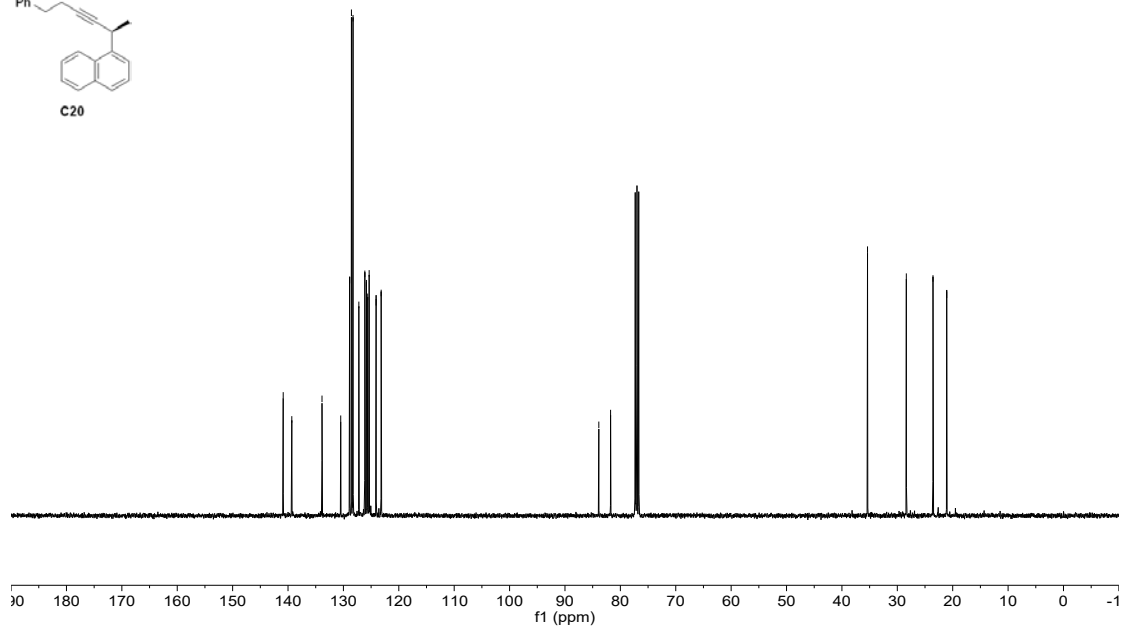

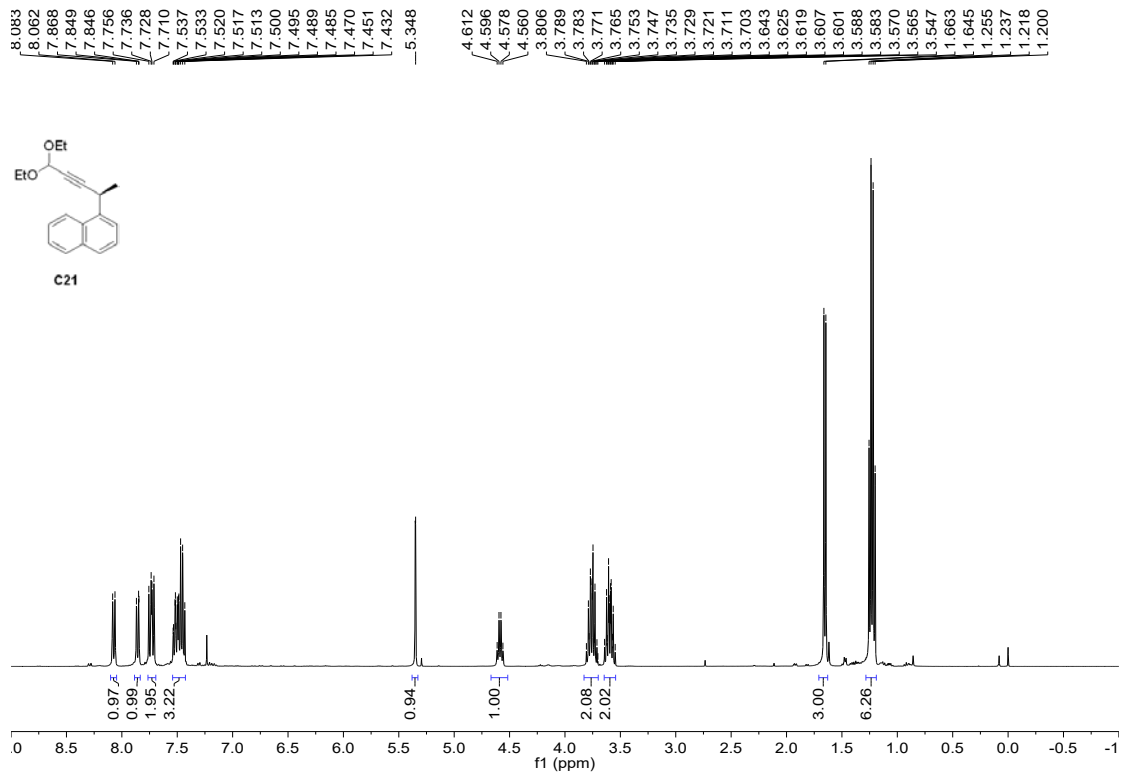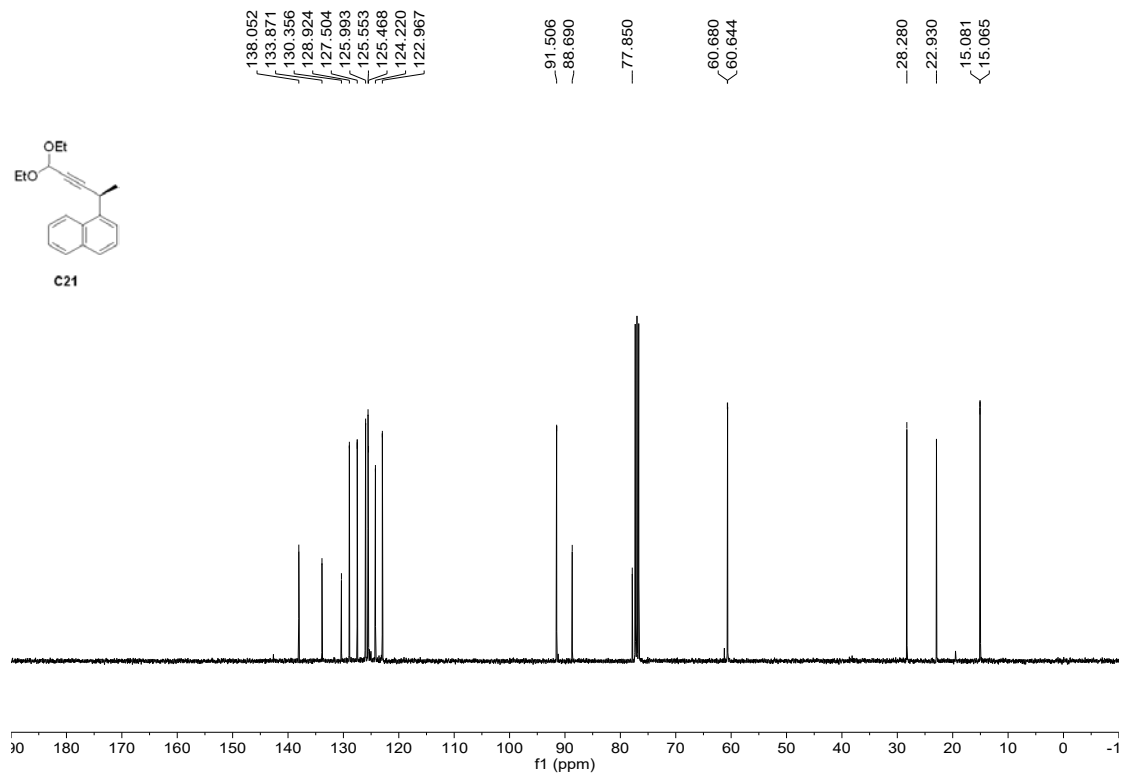

8.053  
8.048  
8.030  
7.860  
7.852  
7.842  
7.837  
7.742  
7.721  
7.649  
7.632  
7.507  
7.502  
7.490  
7.485  
7.479  
7.472  
7.465  
7.459  
7.455  
7.442  
7.438  
7.426  
7.407  
7.387  
7.309  
7.303  
7.298  
7.291  
7.285  
7.282  
7.276  
7.269  
7.263  
7.257  
7.211  
7.003  
6.997  
6.983  
6.981  
6.977  
6.961  
6.959  
4.746  
4.741  
4.562  
4.545  
4.527  
4.509  
1.626  
1.608

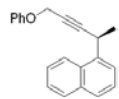

C22

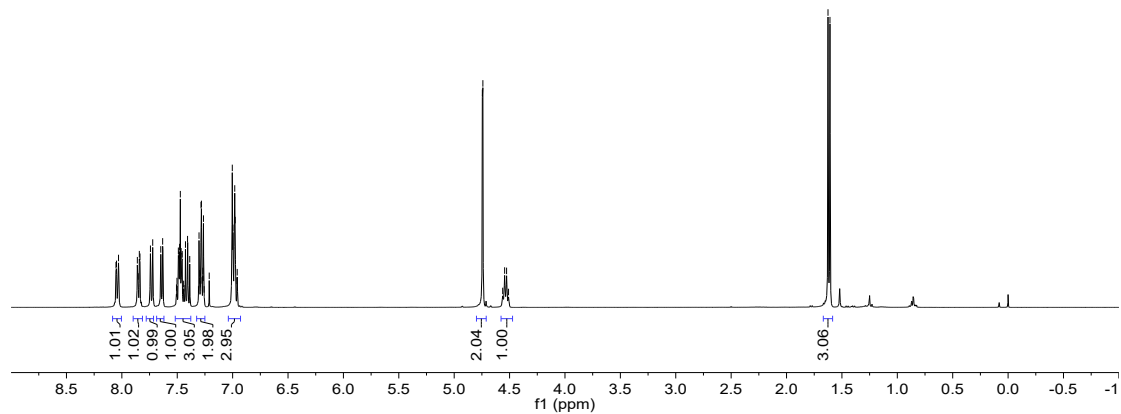

157.739  
138.210  
133.874  
130.380  
129.354  
128.928  
127.499  
126.026  
125.556  
125.478  
124.164  
123.023  
121.238  
115.028  
90.665  
56.386  
28.448  
22.918

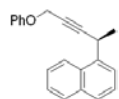

C22

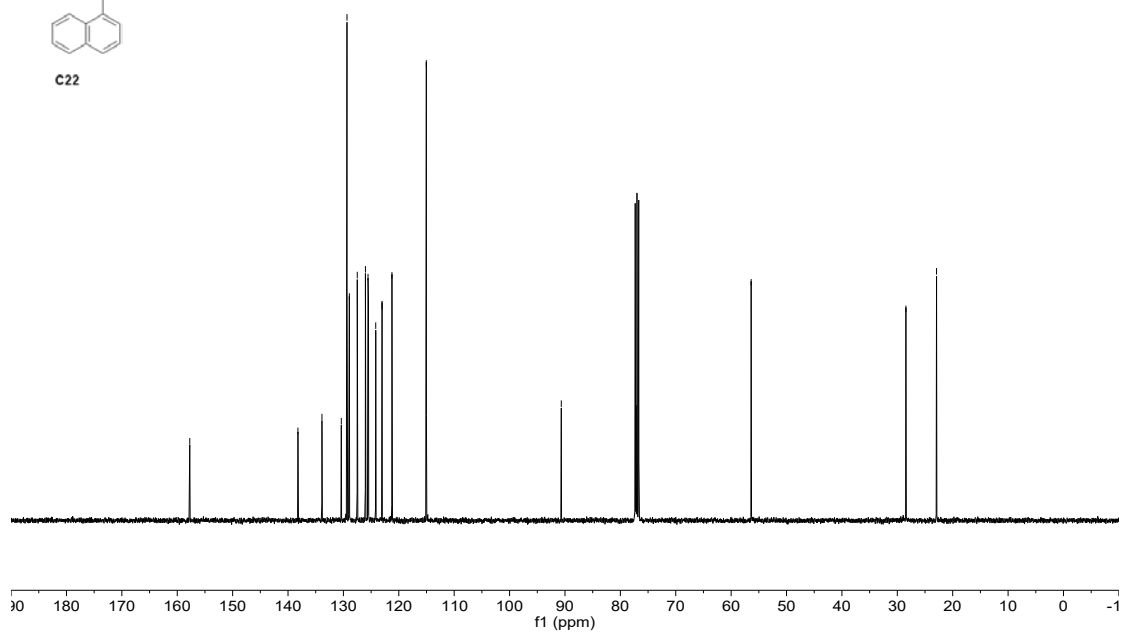

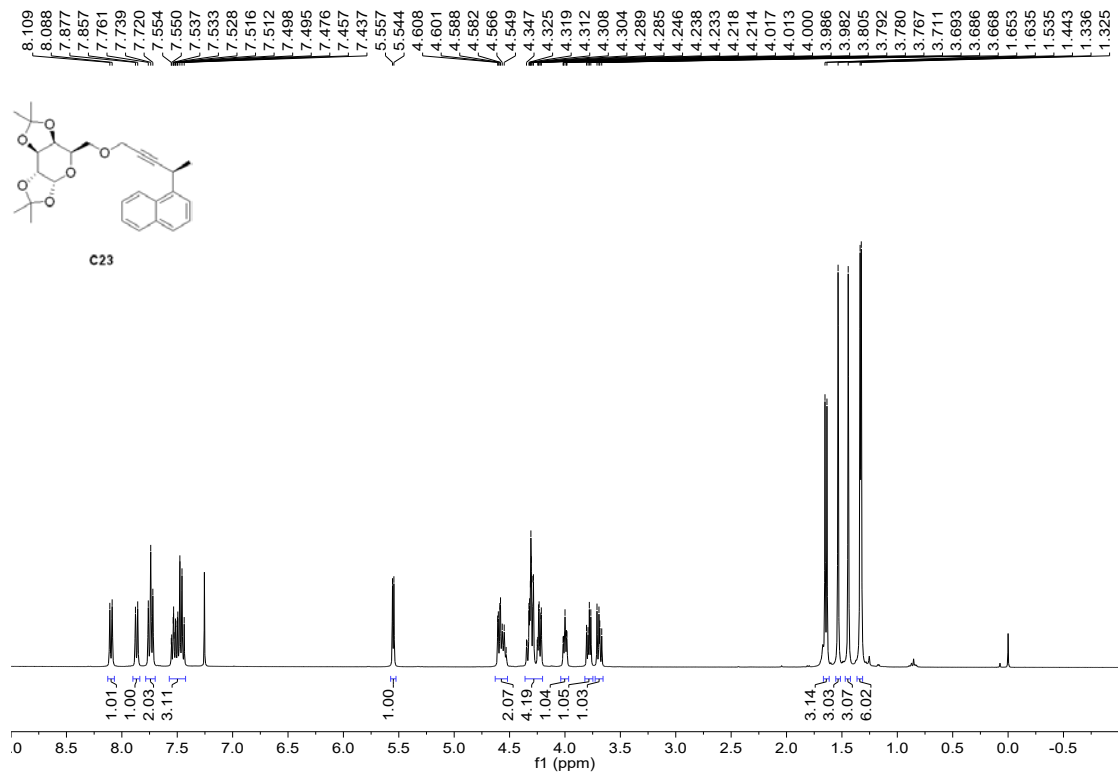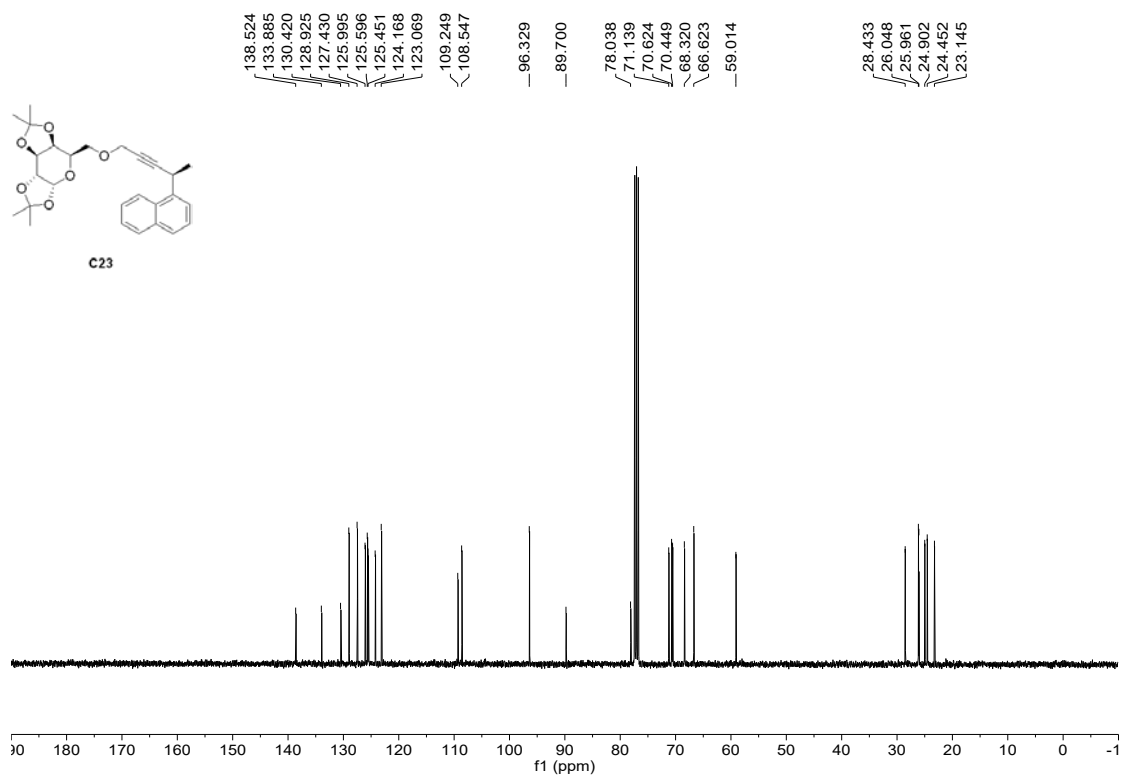



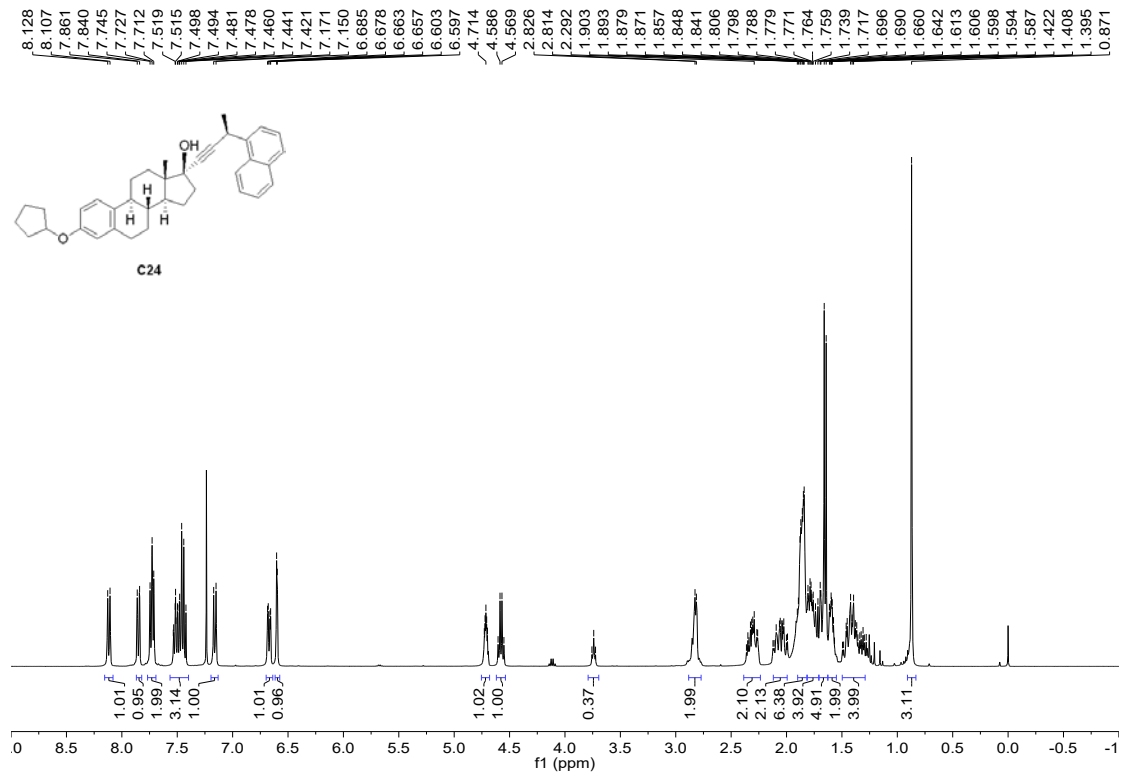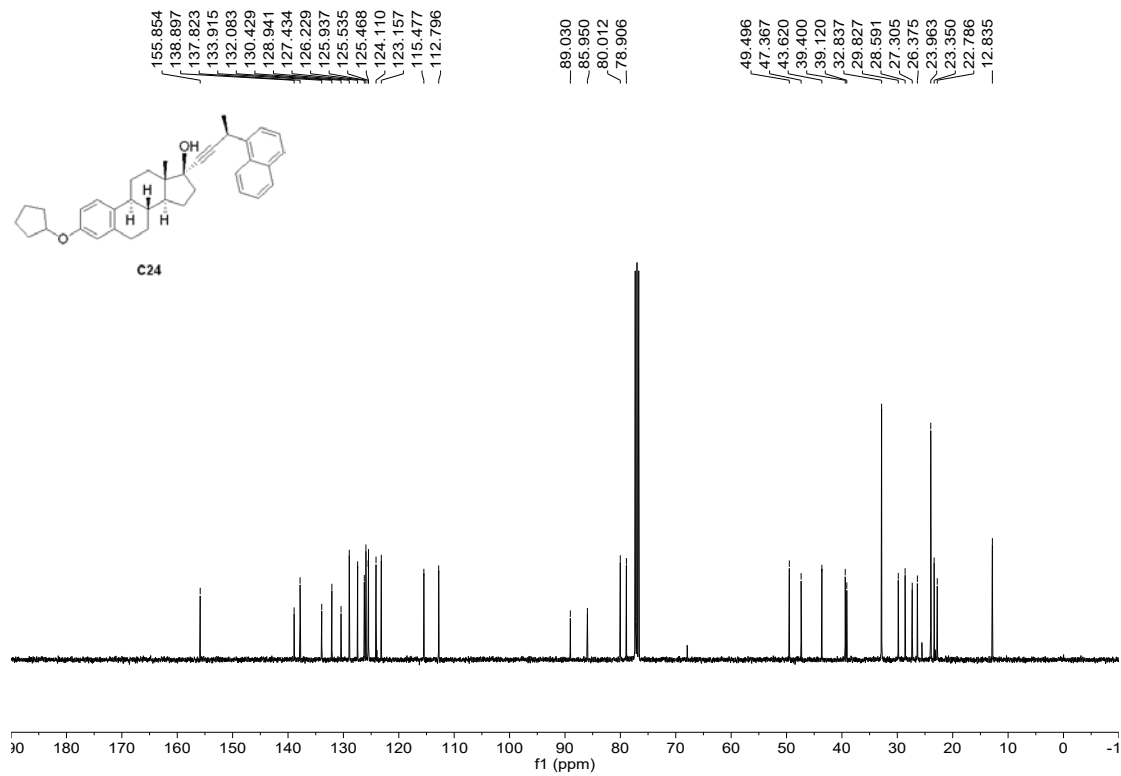

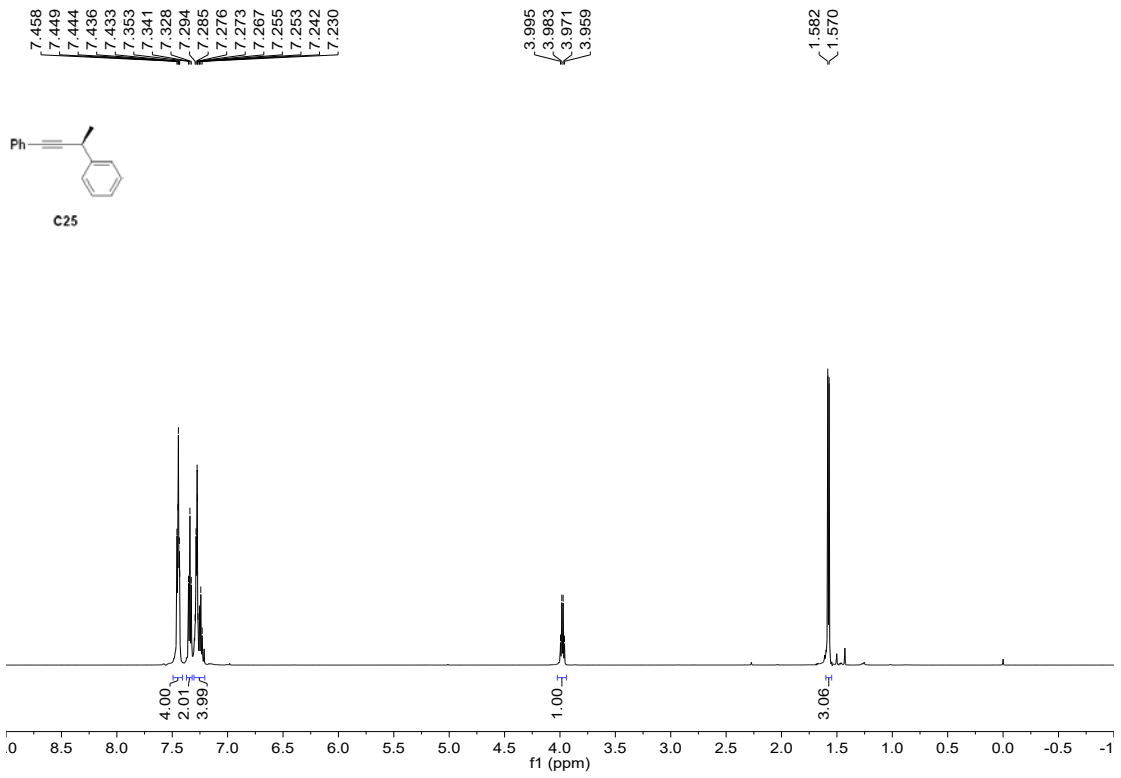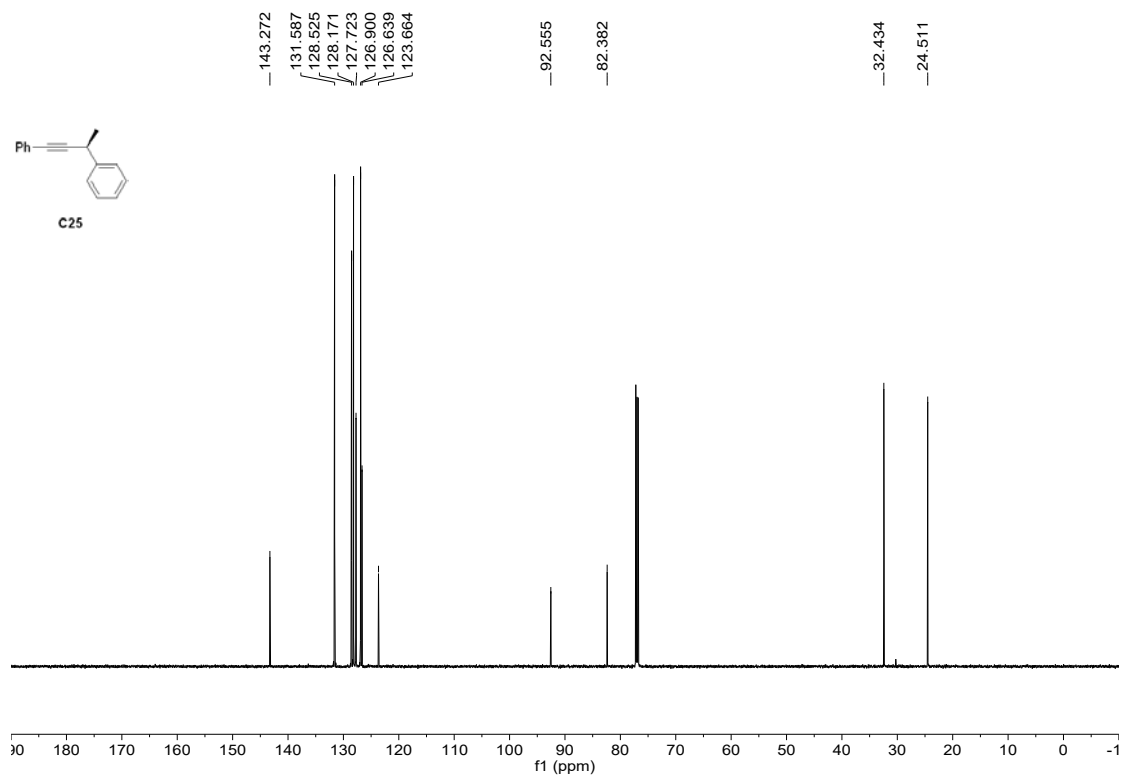

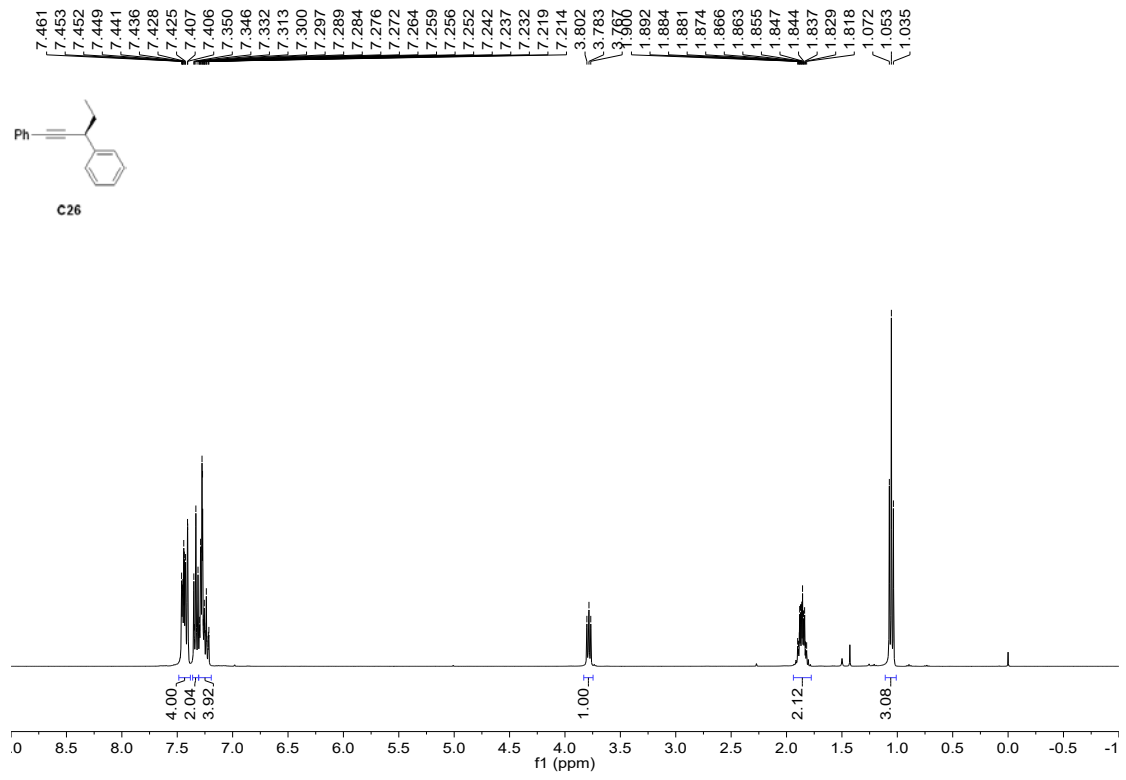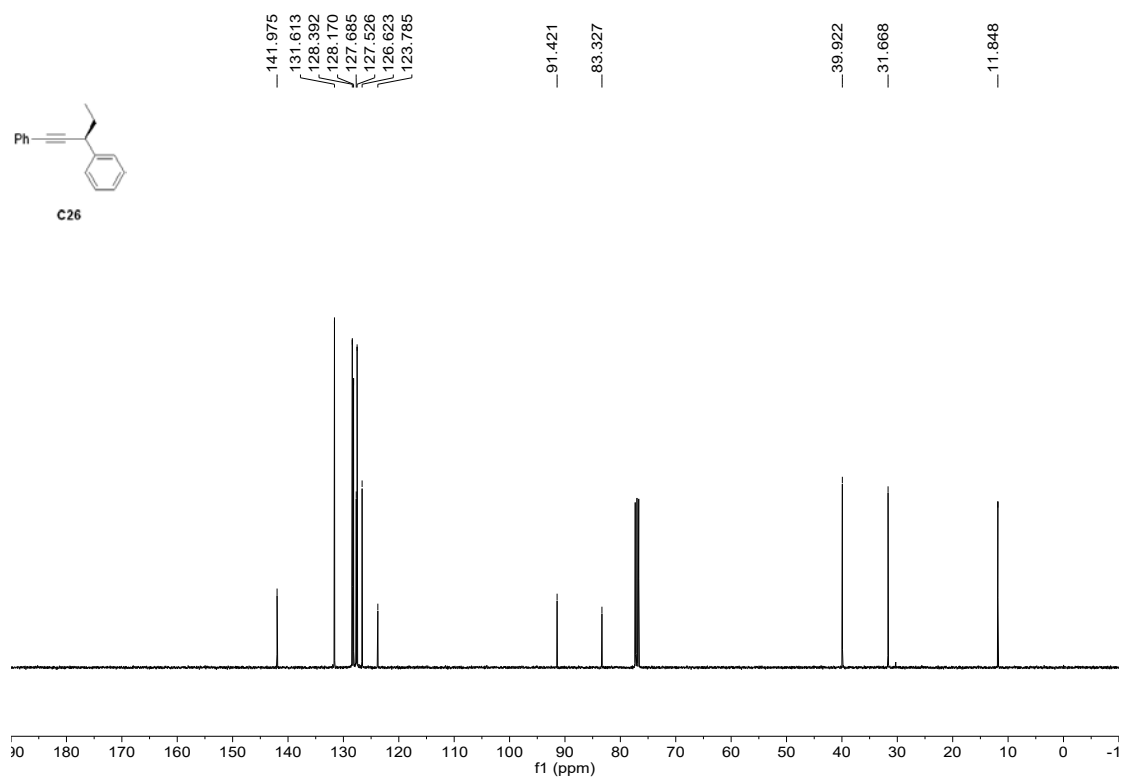

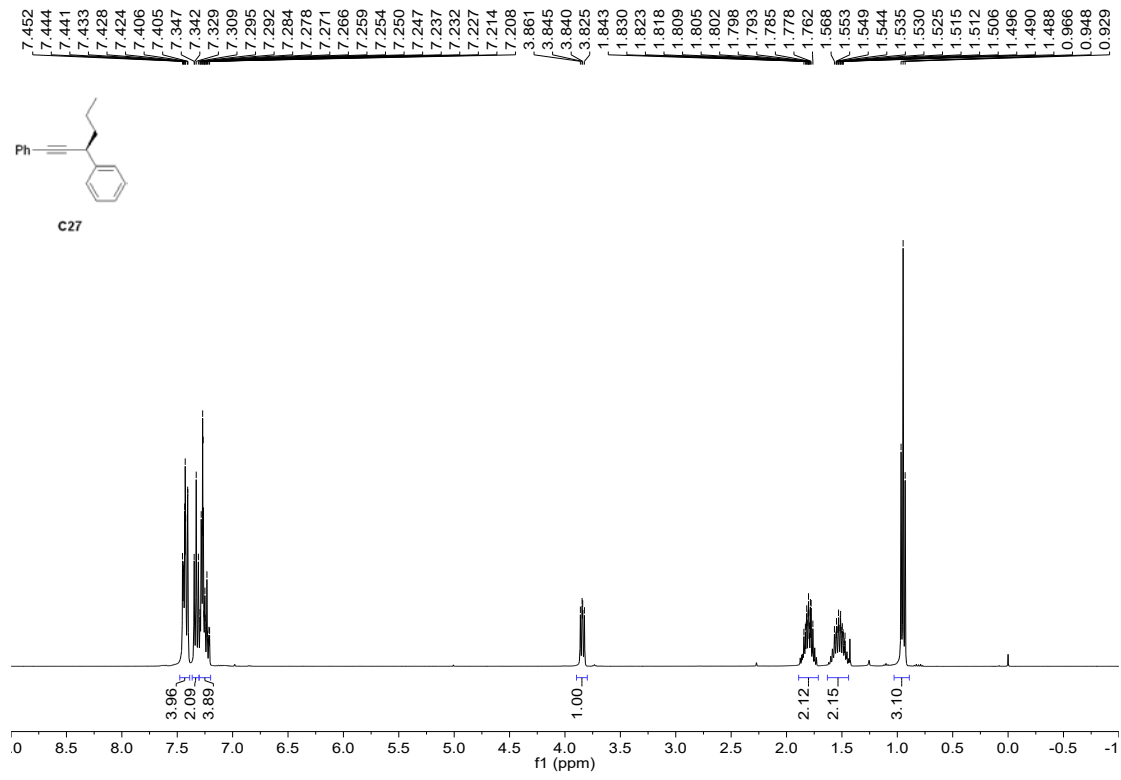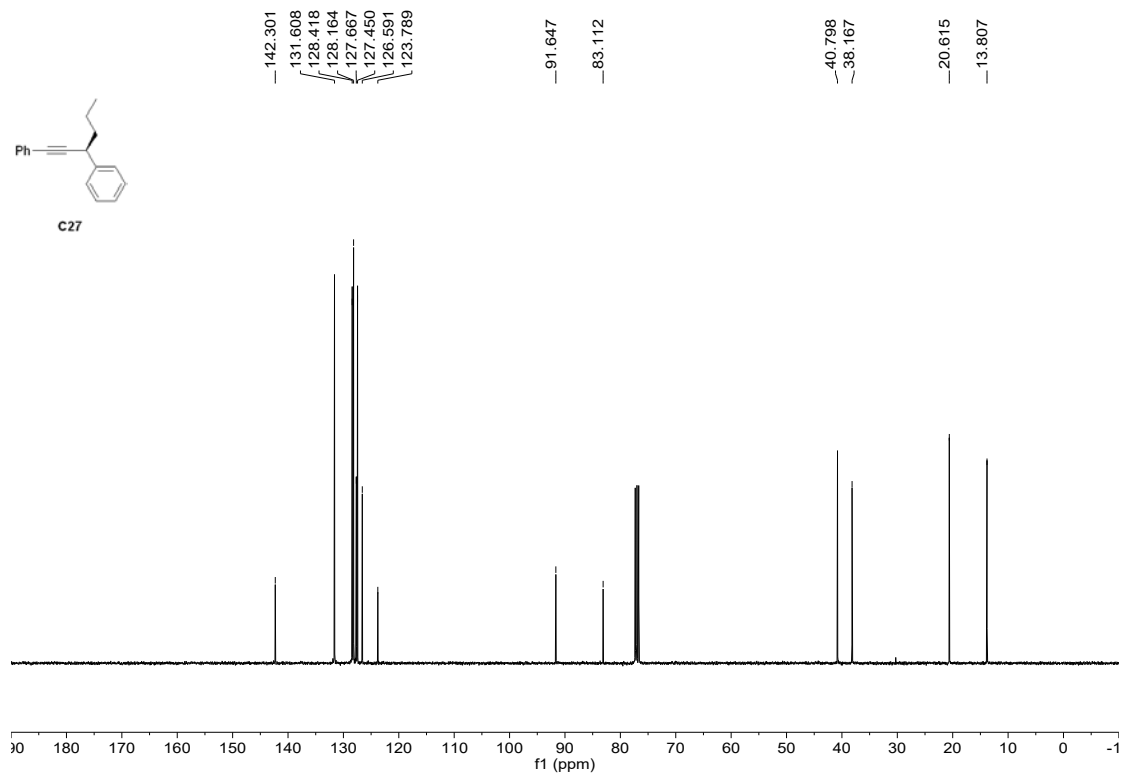

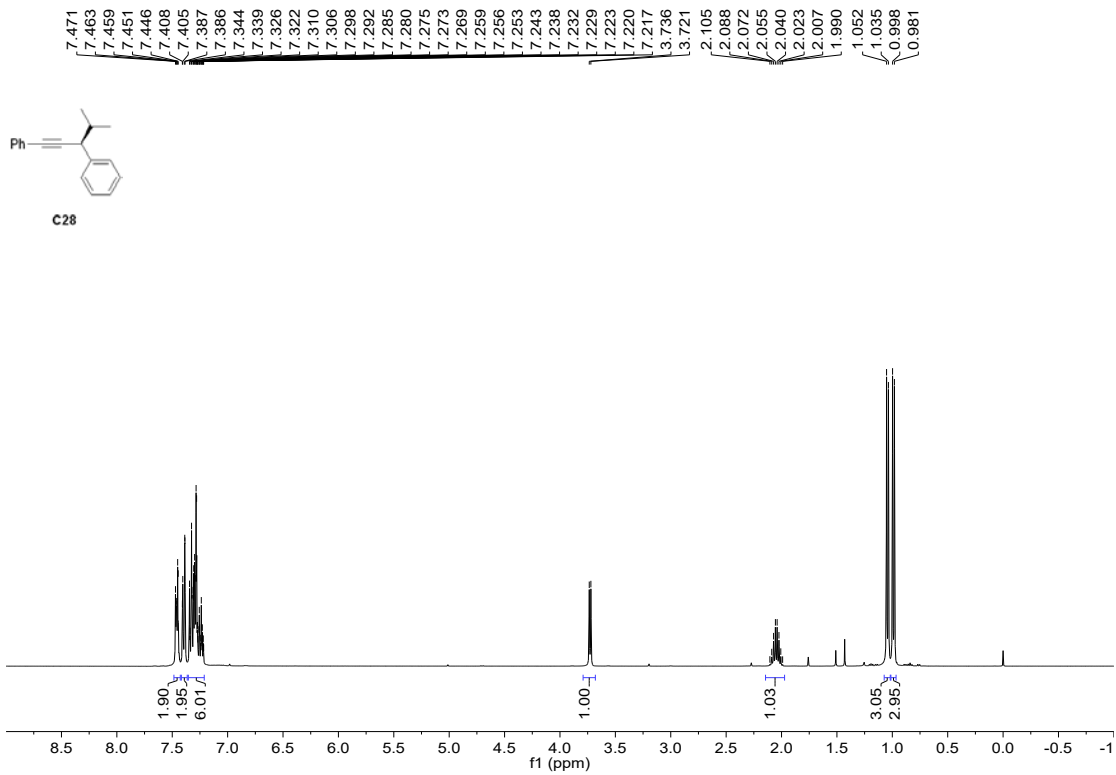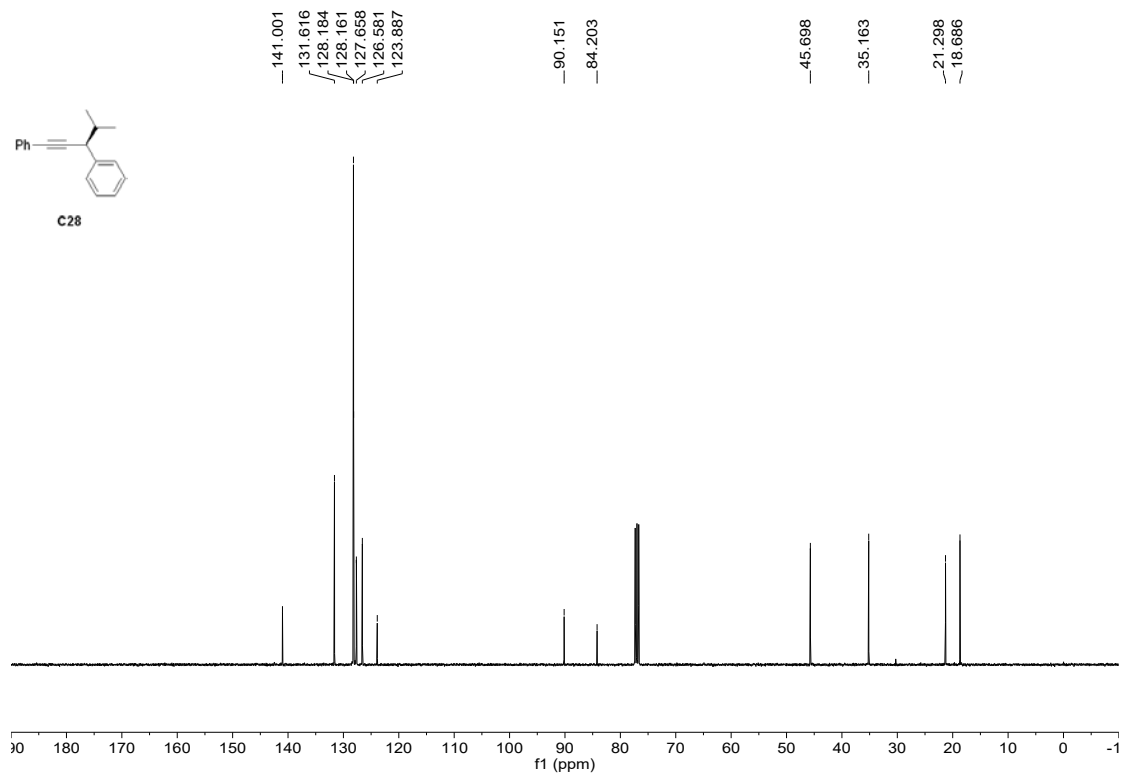

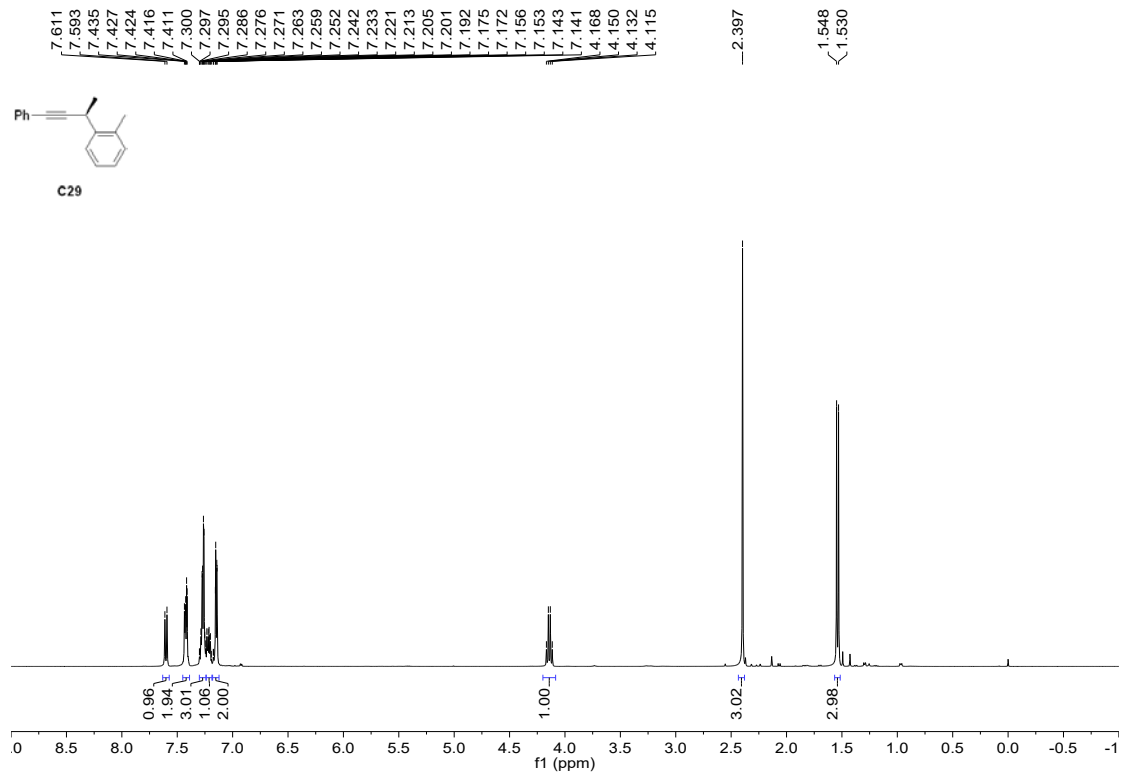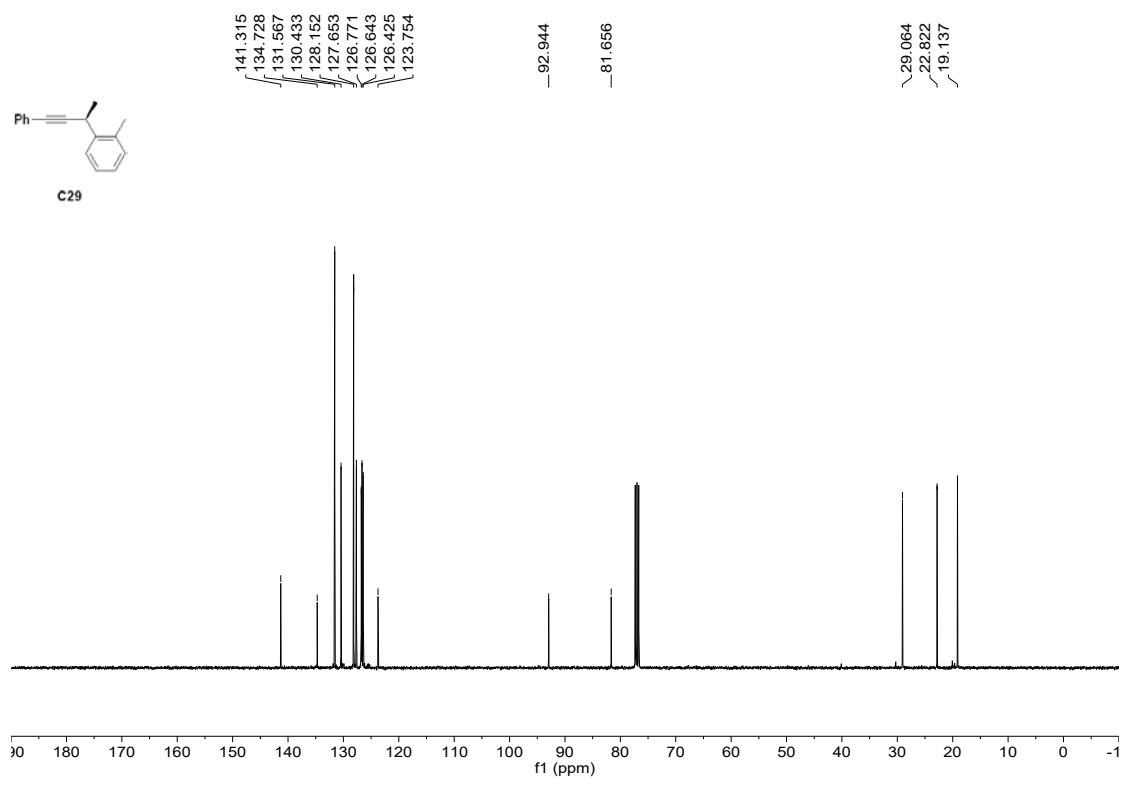

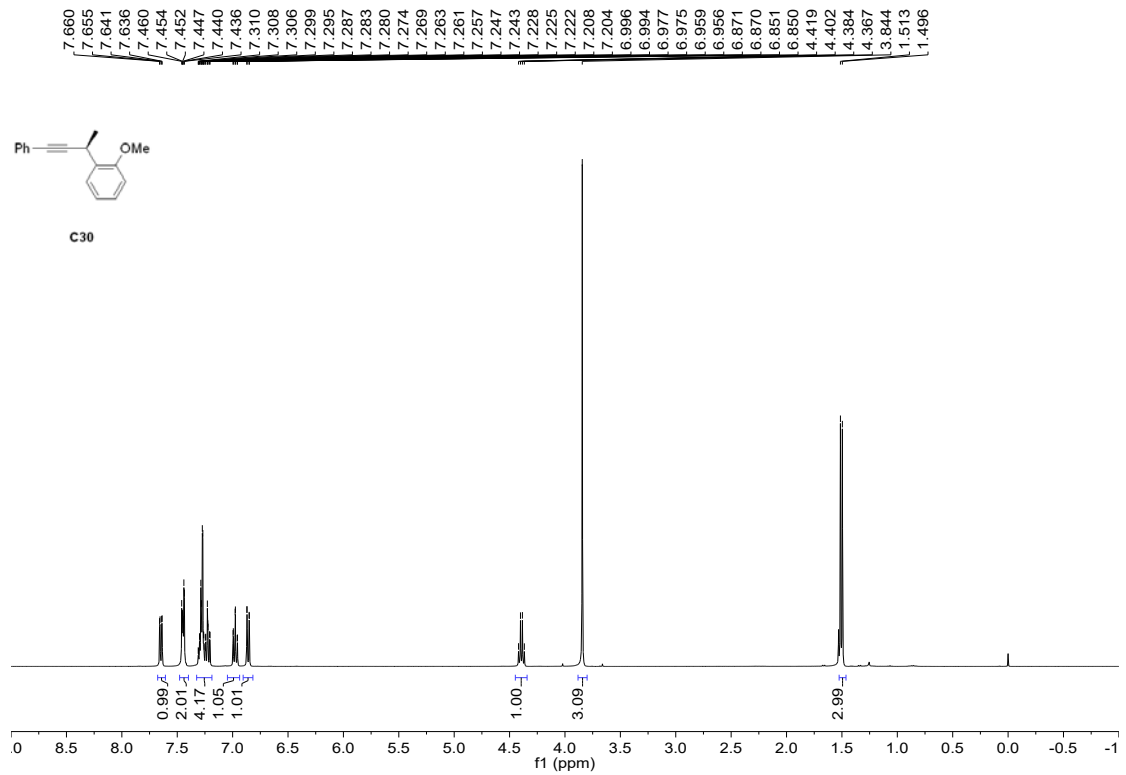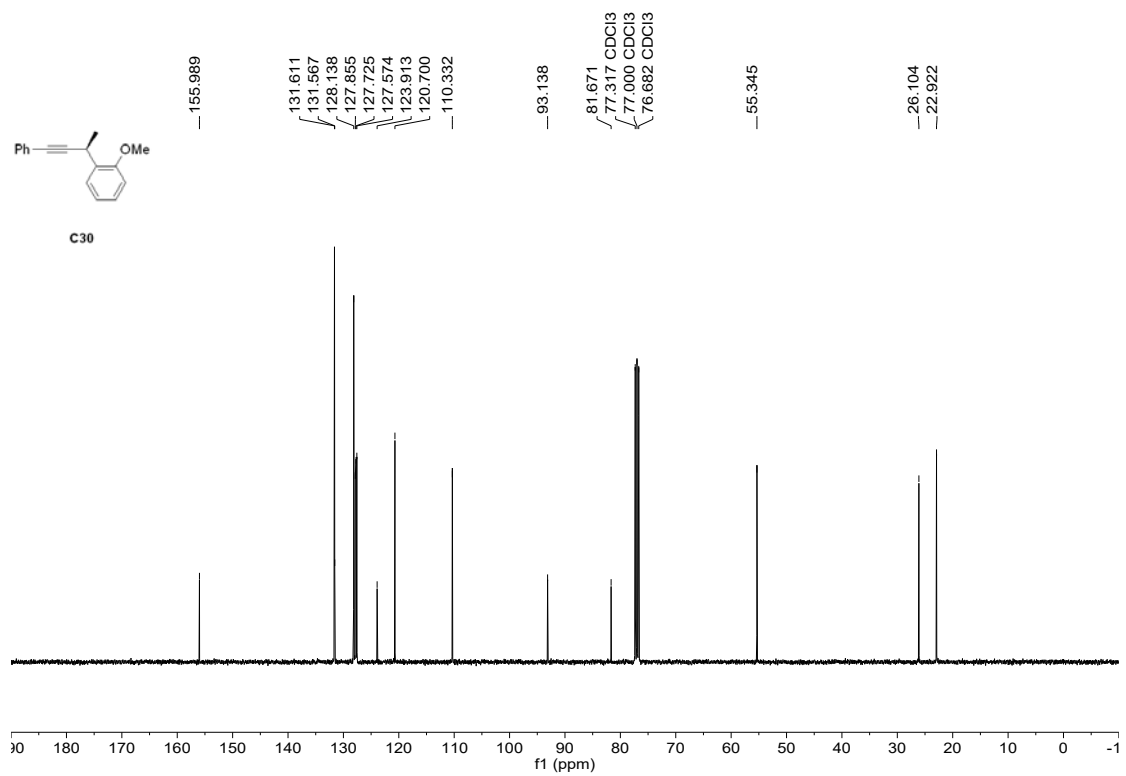

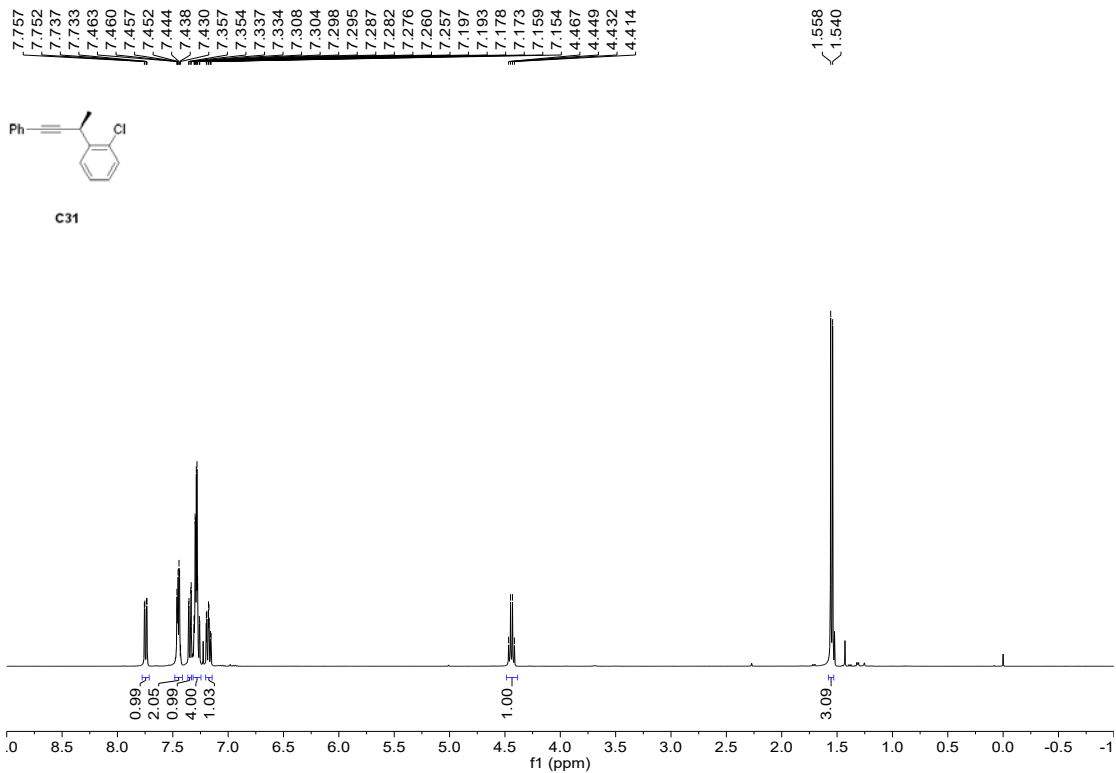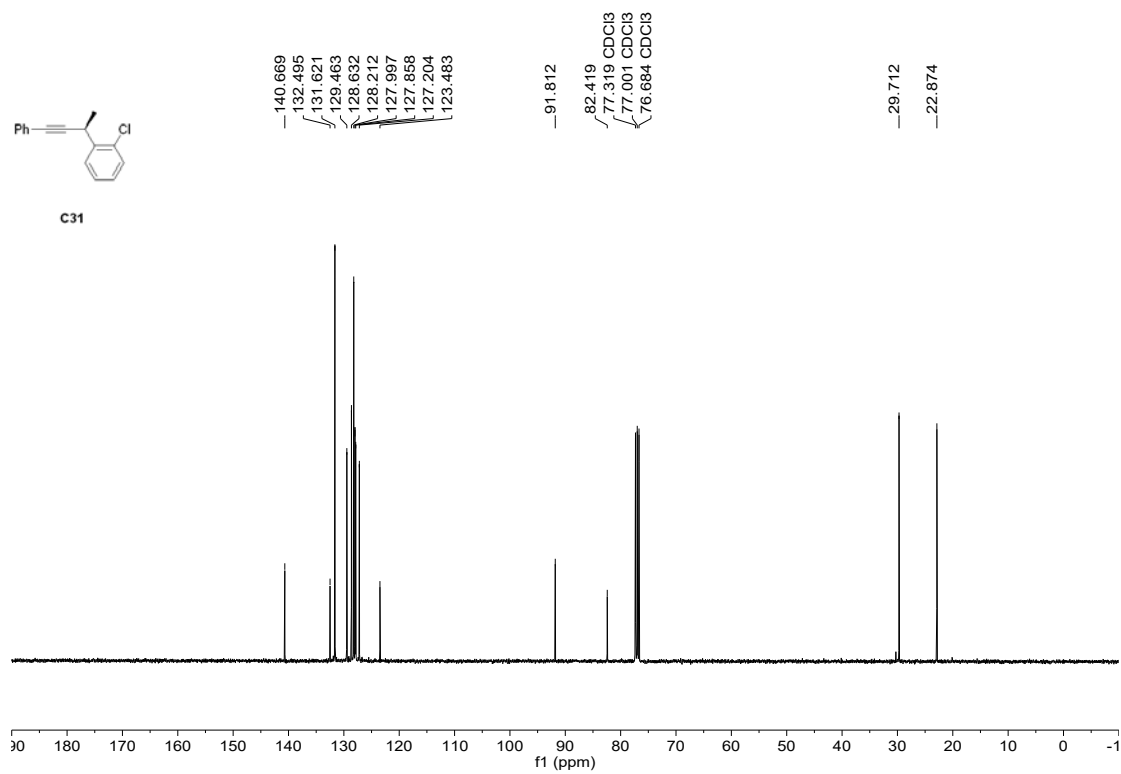



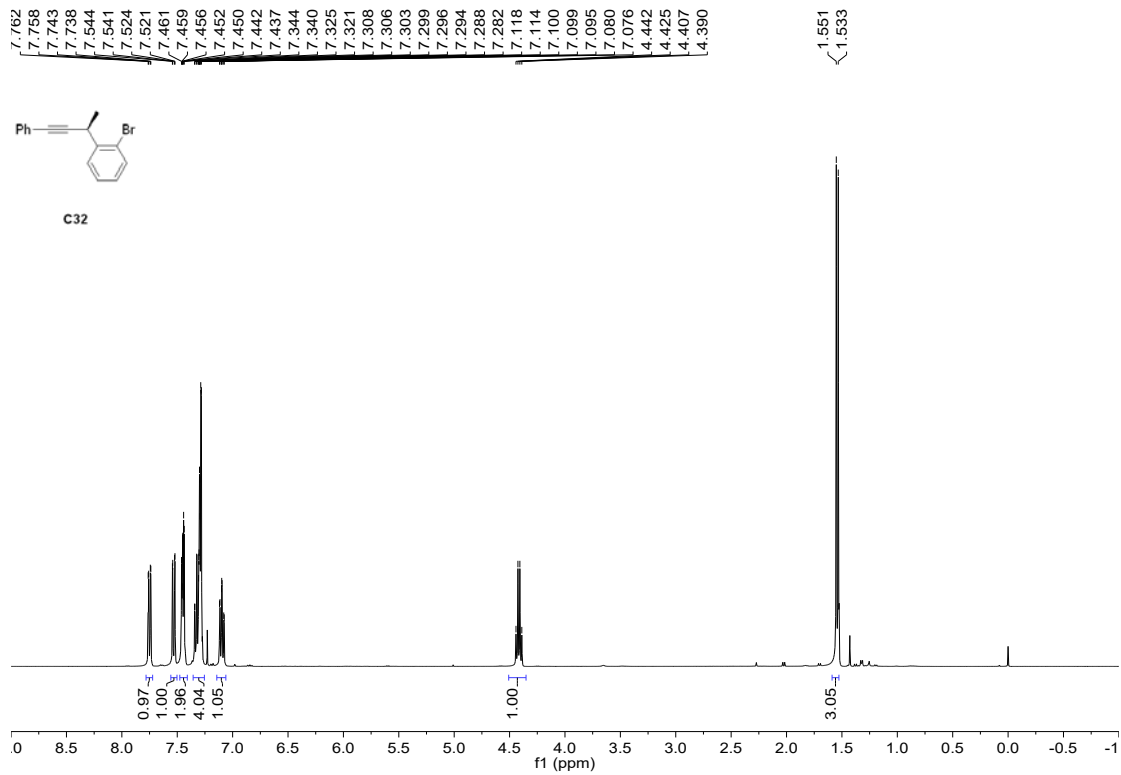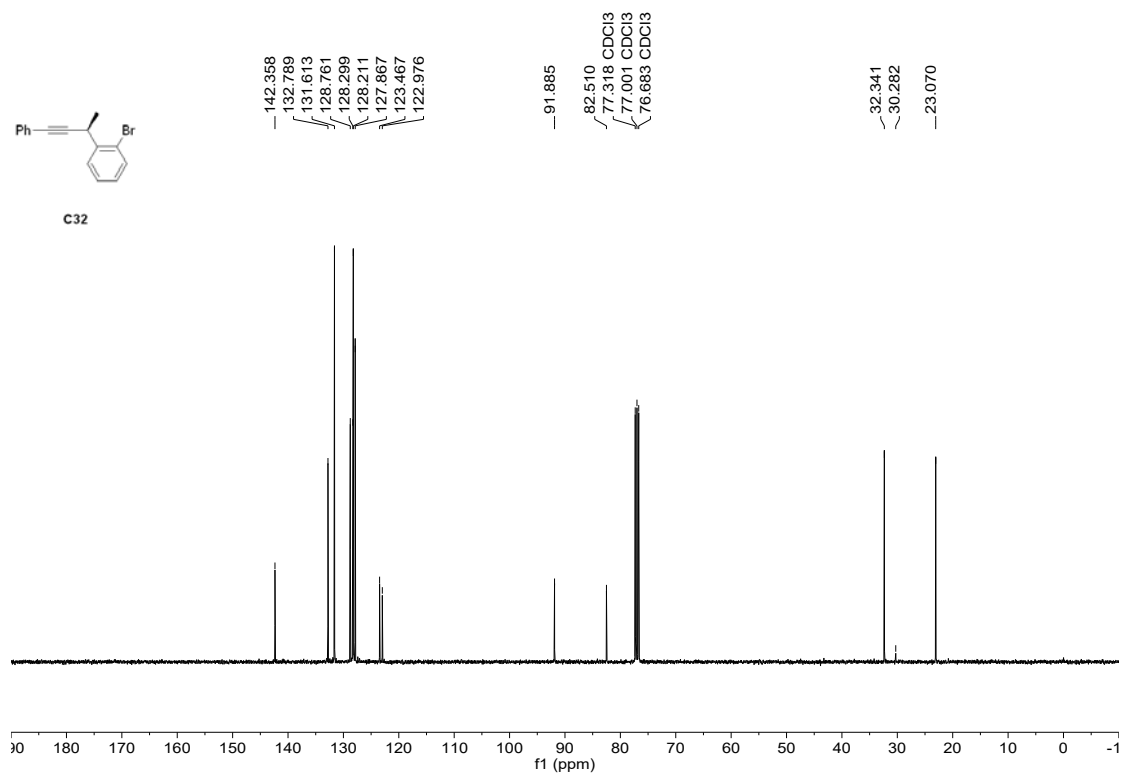

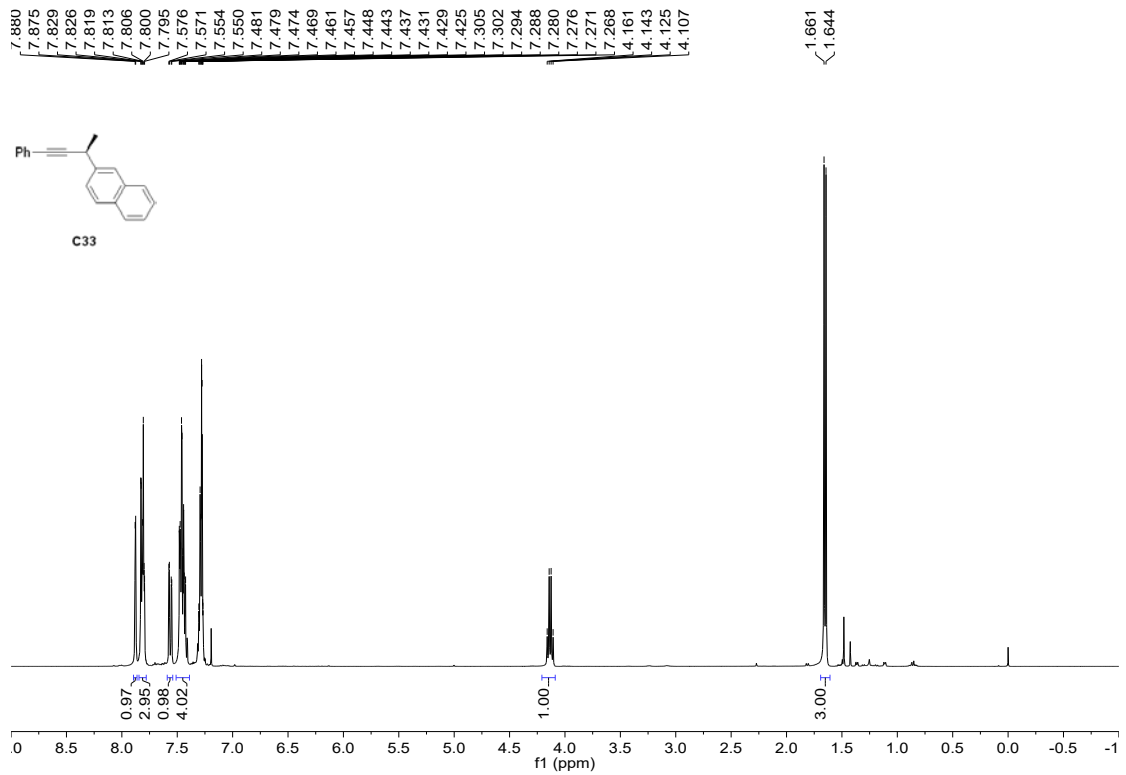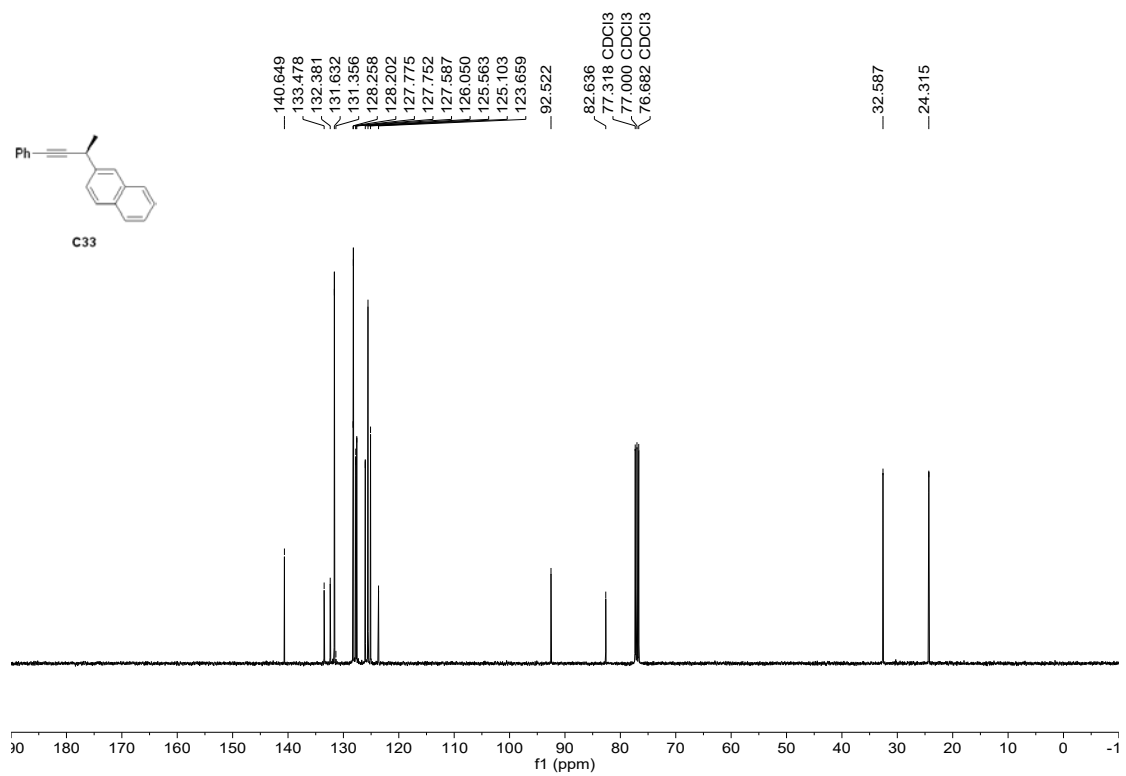

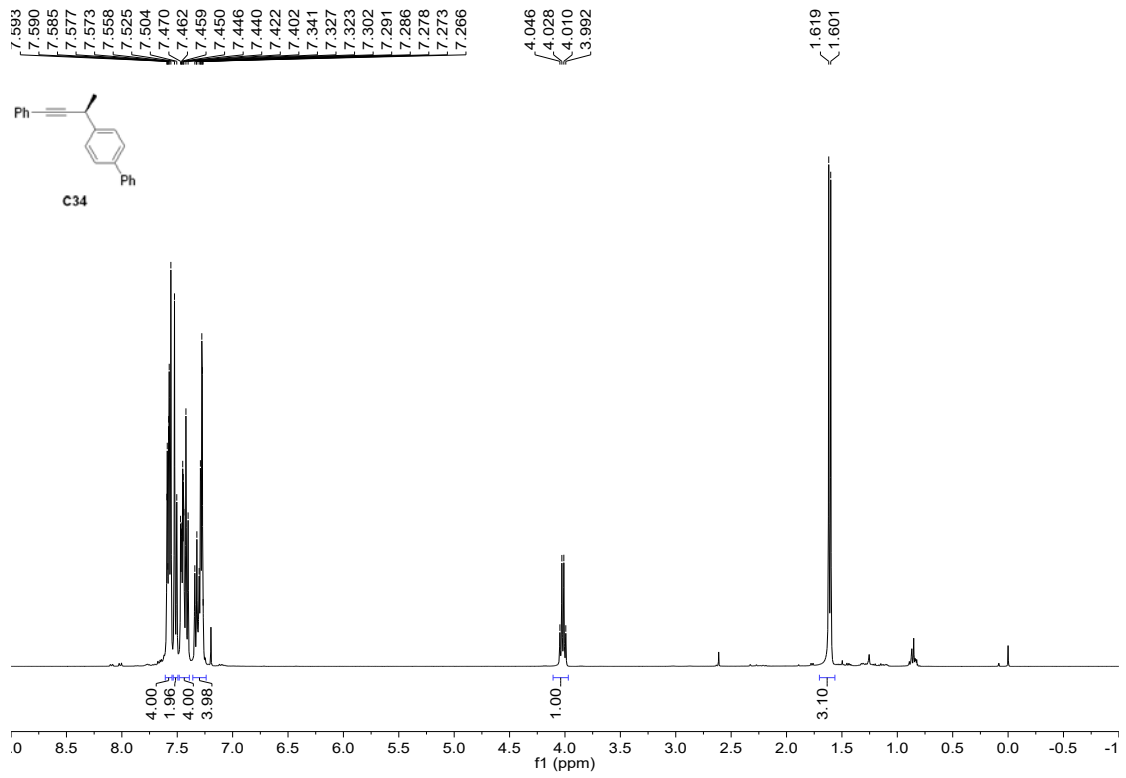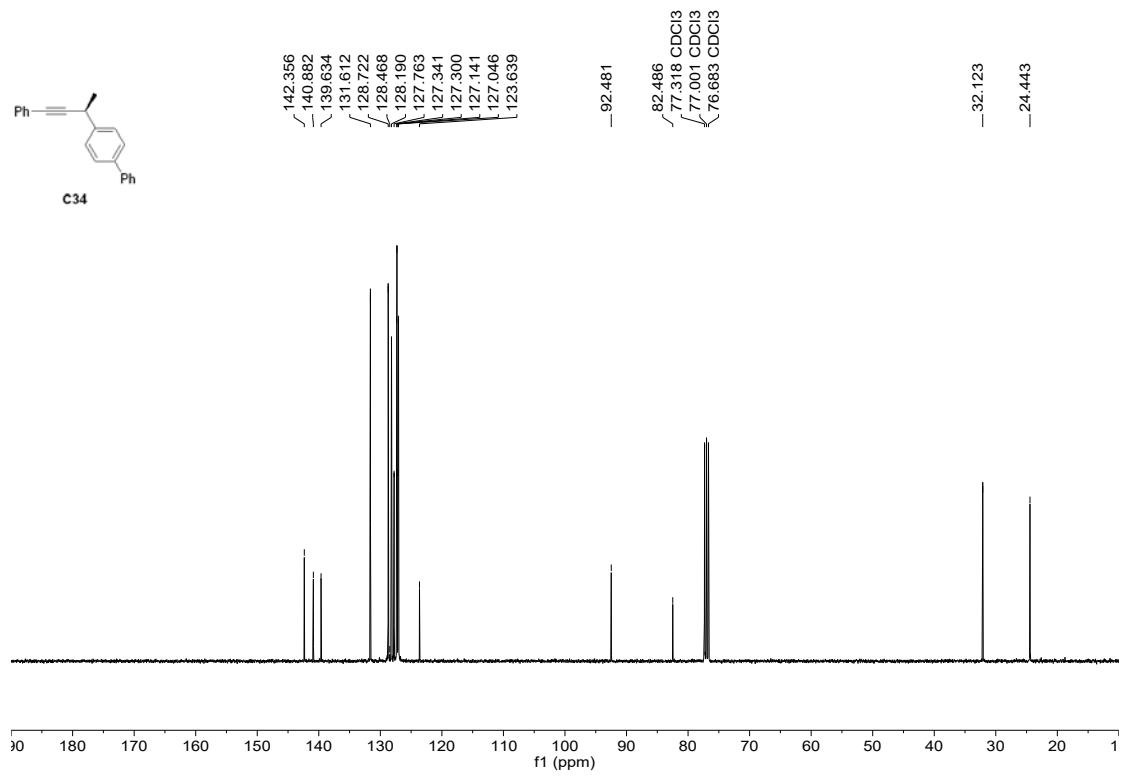

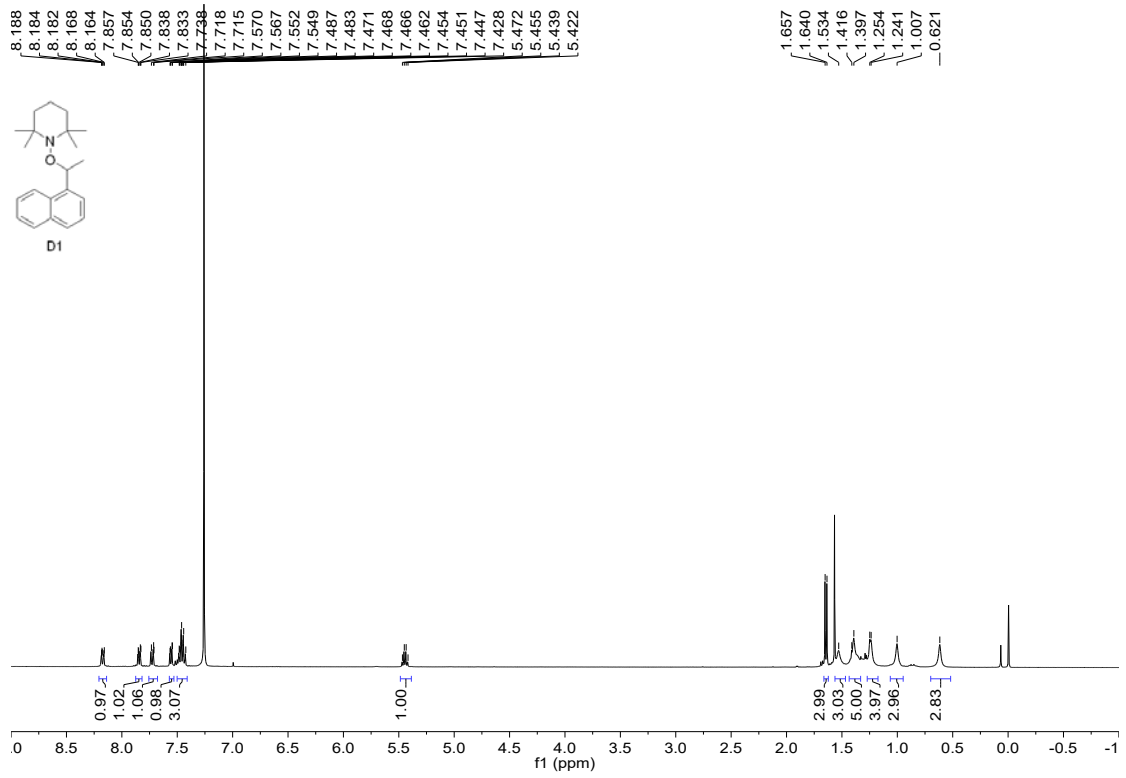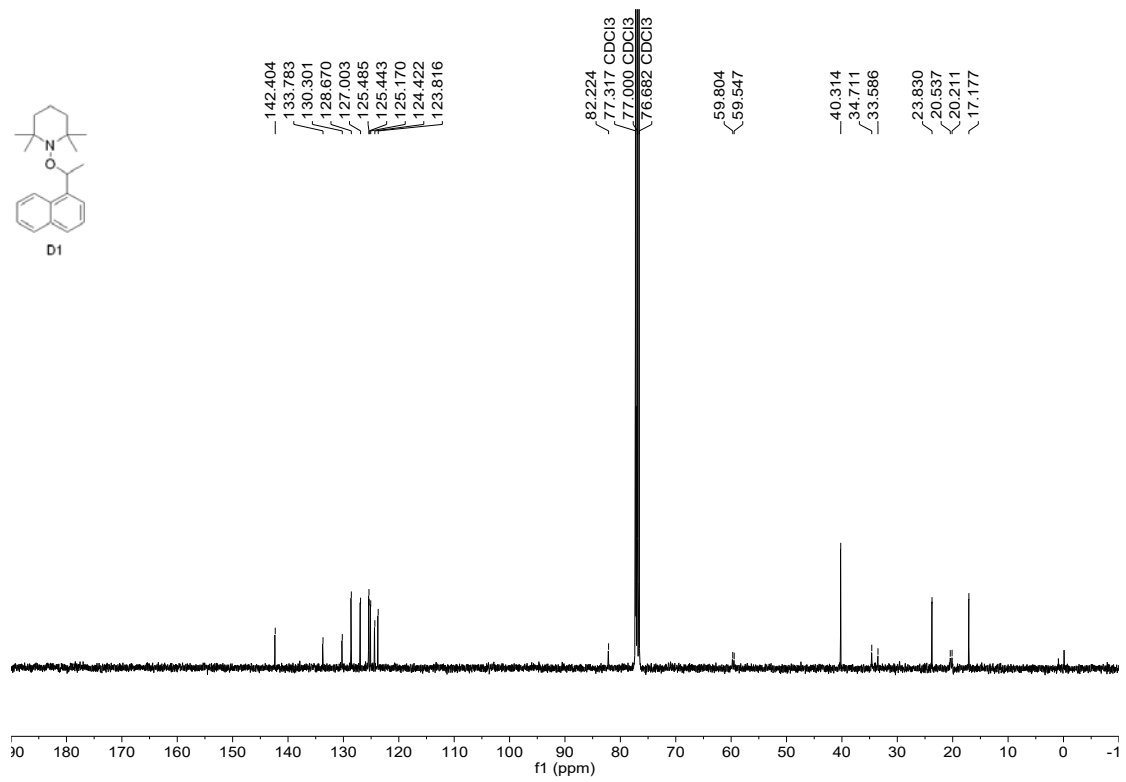

## 11. References

1. Dong, X.-Y.; Zhang, Y.-F.; Ma, C.-L.; Gu, Q.-S.; Wang, F.-L.; Li, Z.-L.; Jiang, S.-P.; Liu, X.-Y. *Nat. Chem.* **2019**, *11*, 1158–1166.
2. Frisch, M. J.; Trucks, G. W.; Schlegel, H. B.; Scuseria, G. E.; Robb, M. A.; Cheeseman, J. R.; Scalmani, G.; Barone, V.; Mennucci, B.; Petersson, G. A.; Nakatsuji, H.; Caricato, M.; Li, X.; Hratchian, H. P.; Izmaylov, A. F.; Bloino, J.; Zheng, G.; Sonnenberg, J. L.; Hada, M.; Ehara, M.; Toyota, K.; Fukuda, R.; Hasegawa, J.; Ishida, M.; Nakajima, T.; Honda, Y.; Kitao, O.; Nakai, H.; Vreven, T.; Montgomery, J. A.; Peralta, J. J. E.; Ogliaro, F.; Bearpark, M.; Heyd, J. J.; Brothers, E.; Kudin, K. N.; Taroverov, V. N.; Keith, T.; Kobayashi, R.; Normand, J.; Raghavachari, K.; Rendell, A.; Burant, J. C.; Iyengar, S. S.; Tomasi, J.; Cossi, M.; Rega, N.; Millam, J. M.; Klene, M.; Knox, J. E.; Cross, J. B.; Bakken, V.; Adamo, C.; Jaramillo, J.; Gomperts, R.; Stratmann, R. E.; Yazyev, O.; Austin, A. J.; Cammi, R.; Pomelli, C.; Ochterski, J. W.; Martin, R. L.; Morokuma, K.; Zakrzewski, V. G.; Voth, G. A.; Salvador, P.; Dannenberg, J. J.; Dapprich, S.; Daniels, A. D.; Farkas, O.; Foresman, J. B.; Ortiz, J. V.; Cioslowski, J.; Fox, D. J. *Gaussian 09 (Revision D.01)*. Gaussian, Wallingford, CT, 2013.
3. Pierens, G. K. *J. Comput. Chem.* **2014**, *35*, 1388–1394.
4. Lu, T.; Chen, F., *J. Comput. Chem.*, **2012**, *33*, 580–592
5. Bannwarth, C.; Ehlert, S.; Grimme, S., *J. Chem. Theory Comput.*, **2019**, *15*, 1652–1671

## 12. Author Contributions

X. H. L. guided the research. J. Z. L. conducted the experiments, analyzed the results, and wrote the Supplementary Information and manuscript. L. C. N. conducted the DFT calculations. Q. F. T. repeated some experiments. X. H. L. and X. M. F. helped revise the Supplementary Information and manuscript. All the authors contributed to the discussion.
